# Supplementary material for: Transcriptome and Gene Expression Analysis of the Rice Leaf Folder, Cnaphalocrosis medinalis
Source: PLoS One. 2012 Nov 19;7(11):e47401. doi: 10.1371/journal.pone.0047401 (PMC3501527; doi:10.1371/journal.pone.0047401)
Supplement: Table S2 — The unigenes annotated by BLASTx against the NCBI Nr protein database. (XLS) [file pone.0047401.s005.xls]

## Sheet: Table S2
Supplementary Table S2. The unigenes annotated by BLASTx against the NCBI Nr protein database.
geneID	geneLength	CmRNA_rawfragments(8763677)	CmRNA_FPKM	Nr-ID	Nr-Score	Nr-Evalue	Nr-annotation
CL10.Contig3_CmRNA	398	21	6.0207	gi|208657693|gb|ACI30143.1|	53.9	2e-06	Kazal domain-containing peptide [Anopheles darlingi]
CL10.Contig4_CmRNA	314	107	38.8837	gi|208657693|gb|ACI30143.1|	55.5	7e-07	Kazal domain-containing peptide [Anopheles darlingi]
CL1000.Contig1_CmRNA	1721	360	23.8691	gi|114051590|ref|NP_001040355.1|	530	1e-149	cellular retinaldehyde-binding protein [Bombyx mori] >gi|95102616|gb|ABF51246.1| cellular retinaldehyde-binding protein [Bombyx mori]
CL1001.Contig1_CmRNA	599	68	12.9538	gi|114052577|ref|NP_001040259.1|	194	2e-48	Mo-molybdopterin cofactor sulfurase [Bombyx mori] >gi|87248539|gb|ABD36322.1| Mo-molybdopterin cofactor sulfurase [Bombyx mori]
CL1001.Contig2_CmRNA	582	97	19.0179	gi|114052577|ref|NP_001040259.1|	194	2e-48	Mo-molybdopterin cofactor sulfurase [Bombyx mori] >gi|87248539|gb|ABD36322.1| Mo-molybdopterin cofactor sulfurase [Bombyx mori]
CL1009.Contig1_CmRNA	953	12	1.4368	gi|151301186|ref|NP_001093084.1|	206	1e-51	proteasome 26S non-ATPase subunit 9 [Bombyx mori] >gi|87248565|gb|ABD36335.1| proteasome 26S non-ATPase subunit 9 [Bombyx mori]
CL1009.Contig2_CmRNA	936	4	0.4876	gi|151301186|ref|NP_001093084.1|	206	9e-52	proteasome 26S non-ATPase subunit 9 [Bombyx mori] >gi|87248565|gb|ABD36335.1| proteasome 26S non-ATPase subunit 9 [Bombyx mori]
CL1011.Contig1_CmRNA	1449	331	26.0659	gi|123439757|ref|XP_001310646.1|	136	3e-30	smooth muscle caldesmon [Trichomonas vaginalis G3]
CL1011.Contig2_CmRNA	2159	1326	70.0817	gi|218505765|ref|NP_001136228.1|	188	8e-46	death-related protein [Bombyx mori] >gi|212989183|gb|ACJ38715.1| death-related protein [Bombyx mori]
CL1017.Contig1_CmRNA	410	132	36.737	gi|3868784|dbj|BAA34219.1|	72	7e-12	MBF2 [Samia cynthia]
CL1018.Contig1_CmRNA	574	192	38.1683	gi|122106997|sp|Q17L24.1|DRE2_AEDAE	194	2e-48	RecName: Full=Anamorsin homolog; AltName: Full=Fe-S cluster assembly protein DRE2 homolog
CL1024.Contig1_CmRNA	1306	341	29.7937	gi|307170050|gb|EFN62498.1|	105	6e-21	RNA-directed DNA polymerase from mobile element jockey [Camponotus floridanus]
CL1024.Contig2_CmRNA	404	12	3.3893	gi|156540830|ref|XP_001599301.1|	52.4	6e-06	PREDICTED: similar to pol-like protein [Nasonia vitripennis]
CL1025.Contig1_CmRNA	384	13	3.863	gi|307204651|gb|EFN83273.1|	116	3e-25	Titin [Harpegnathos saltator]
CL1025.Contig2_CmRNA	269	0	0	gi|307172724|gb|EFN64030.1|	73.9	2e-12	Titin [Camponotus floridanus]
CL1027.Contig1_CmRNA	1968	54	3.131	gi|283483977|ref|NP_001164469.1|	625	1e-177	flavone synthase I [Bombyx mori] >gi|214011179|gb|ACJ61346.1| flavone synthase I [Bombyx mori]
CL1027.Contig2_CmRNA	1887	17	1.028	gi|283483977|ref|NP_001164469.1|	625	1e-177	flavone synthase I [Bombyx mori] >gi|214011179|gb|ACJ61346.1| flavone synthase I [Bombyx mori]
CL1033.Contig1_CmRNA	528	33	7.1317	gi|307180445|gb|EFN68471.1|	143	3e-33	NADH dehydrogenase [ubiquinone] 1 alpha subcomplex subunit 13 [Camponotus floridanus]
CL1033.Contig2_CmRNA	381	2	0.599	gi|195397581|ref|XP_002057407.1|	115	4e-25	GJ16359 [Drosophila virilis] >gi|194147174|gb|EDW62893.1| GJ16359 [Drosophila virilis]
CL1036.Contig1_CmRNA	264	209	90.335	gi|148696949|gb|EDL28896.1|	52.4	6e-06	mCG1051063 [Mus musculus]
CL104.Contig1_CmRNA	409	8	2.2319	gi|195488944|ref|XP_002092528.1|	89	6e-17	GE14248 [Drosophila yakuba] >gi|194178629|gb|EDW92240.1| GE14248 [Drosophila yakuba]
CL104.Contig2_CmRNA	391	2	0.5837	gi|24658804|ref|NP_523815.2|	81.6	9e-15	nahoda, isoform A [Drosophila melanogaster] >gi|24658811|ref|NP_726264.1| nahoda, isoform B [Drosophila melanogaster] >gi|16767924|gb|AAL28180.1| GH04942p [Drosophila melanogaster] >gi|21626572|gb|AAF46927.2| nahoda, isoform A [Drosophila melanogaster] >gi|23240118|gb|AAN16114.1| nahoda, isoform B [Drosophila melanogaster]
CL104.Contig3_CmRNA	301	6	2.2746	gi|290973138|ref|XP_002669306.1|	58.9	6e-08	predicted protein [Naegleria gruberi] >gi|284082852|gb|EFC36562.1| predicted protein [Naegleria gruberi]
CL1043.Contig1_CmRNA	1231	84	7.7864	gi|328670879|gb|AEB26316.1|	556	1e-157	heat shock protein 105 [Helicoverpa armigera]
CL1043.Contig2_CmRNA	895	5	0.6375	gi|328670879|gb|AEB26316.1|	491	1e-137	heat shock protein 105 [Helicoverpa armigera]
CL1043.Contig3_CmRNA	554	7	1.4418	gi|328670879|gb|AEB26316.1|	337	2e-91	heat shock protein 105 [Helicoverpa armigera]
CL1044.Contig1_CmRNA	866	748	98.5592	gi|91077188|ref|XP_972702.1|	148	3e-34	PREDICTED: similar to CG33205 CG33205-PH [Tribolium castaneum]
CL1044.Contig2_CmRNA	783	102	14.8646	gi|91077188|ref|XP_972702.1|	62.4	2e-08	PREDICTED: similar to CG33205 CG33205-PH [Tribolium castaneum]
CL1048.Contig1_CmRNA	1296	155	13.6471	gi|162424429|gb|ABX89935.1|	778	0	diacylglycerol kinase [Spodoptera littoralis]
CL1048.Contig2_CmRNA	829	7	0.9635	gi|162424429|gb|ABX89935.1|	509	1e-143	diacylglycerol kinase [Spodoptera littoralis]
CL105.Contig1_CmRNA	493	10	2.3146	gi|158293544|ref|XP_314885.3|	167	1e-40	AGAP008763-PA [Anopheles gambiae str. PEST] >gi|157016759|gb|EAA10272.3| AGAP008763-PA [Anopheles gambiae str. PEST]
CL105.Contig2_CmRNA	477	3	0.7177	gi|158293544|ref|XP_314885.3|	167	1e-40	AGAP008763-PA [Anopheles gambiae str. PEST] >gi|157016759|gb|EAA10272.3| AGAP008763-PA [Anopheles gambiae str. PEST]
CL105.Contig3_CmRNA	476	2	0.4794	gi|158293544|ref|XP_314885.3|	167	1e-40	AGAP008763-PA [Anopheles gambiae str. PEST] >gi|157016759|gb|EAA10272.3| AGAP008763-PA [Anopheles gambiae str. PEST]
CL1053.Contig1_CmRNA	857	91	12.1164	gi|158286916|ref|XP_001688152.1|	54.3	7e-06	AGAP006740-PB [Anopheles gambiae str. PEST] >gi|157020696|gb|EDO64801.1| AGAP006740-PB [Anopheles gambiae str. PEST]
CL1057.Contig1_CmRNA	250	27	12.3236	gi|33590491|gb|AAQ22771.1|	65.1	9e-10	serine proteinase inhibitor [Procambarus clarkii]
CL1059.Contig1_CmRNA	1257	9	0.817	gi|340722743|ref|XP_003399762.1|	63.5	2e-08	PREDICTED: hypothetical protein LOC100650739 [Bombus terrestris]
CL1059.Contig2_CmRNA	1206	5	0.4731	gi|340722743|ref|XP_003399762.1|	63.5	2e-08	PREDICTED: hypothetical protein LOC100650739 [Bombus terrestris]
CL106.Contig1_CmRNA	2345	2712	131.965	gi|91084741|ref|XP_971031.1|	327	2e-87	PREDICTED: similar to apolipoprotein D [Tribolium castaneum]
CL1061.Contig1_CmRNA	482	33	7.8123	gi|340708910|ref|XP_003393060.1|	175	5e-43	PREDICTED: apoptosis 1 inhibitor-like isoform 1 [Bombus terrestris] >gi|340708912|ref|XP_003393061.1| PREDICTED: apoptosis 1 inhibitor-like isoform 2 [Bombus terrestris]
CL1062.Contig1_CmRNA	1692	328	22.1201	gi|183979268|dbj|BAG30795.1|	482	1e-134	similar to CG3431-PA [Papilio xuthus]
CL1062.Contig2_CmRNA	1003	8	0.9101	gi|183979268|dbj|BAG30795.1|	196	2e-48	similar to CG3431-PA [Papilio xuthus]
CL1063.Contig1_CmRNA	776	202	29.7032	gi|328787927|ref|XP_392519.2|	60.5	8e-08	PREDICTED: sortilin-related receptor [Apis mellifera]
CL1066.Contig1_CmRNA	1139	42	4.2076	gi|157118987|ref|XP_001659281.1|	303	1e-80	zinc finger protein [Aedes aegypti] >gi|108875491|gb|EAT39716.1| zinc finger protein [Aedes aegypti]
CL1066.Contig2_CmRNA	790	3	0.4333	gi|157118987|ref|XP_001659281.1|	296	5e-79	zinc finger protein [Aedes aegypti] >gi|108875491|gb|EAT39716.1| zinc finger protein [Aedes aegypti]
CL1069.Contig1_CmRNA	760	32	4.8045	gi|291227185|ref|XP_002733567.1|	103	6e-21	PREDICTED: HSPC069-like [Saccoglossus kowalevskii]
CL1069.Contig2_CmRNA	676	6	1.0128	gi|291227185|ref|XP_002733567.1|	89	2e-16	PREDICTED: HSPC069-like [Saccoglossus kowalevskii]
CL1073.Contig1_CmRNA	1820	611	38.3075	gi|241659425|emb|CAZ65619.1|	721	0	cytochrome P450 [Cnaphalocrocis medinalis]
CL1073.Contig2_CmRNA	1408	26	2.1071	gi|241659425|emb|CAZ65619.1|	790	0	cytochrome P450 [Cnaphalocrocis medinalis]
CL1073.Contig3_CmRNA	1074	447	47.4916	gi|241659425|emb|CAZ65619.1|	727	0	cytochrome P450 [Cnaphalocrocis medinalis]
CL1073.Contig4_CmRNA	718	445	70.7211	gi|241659425|emb|CAZ65619.1|	180	6e-44	cytochrome P450 [Cnaphalocrocis medinalis]
CL1073.Contig5_CmRNA	435	24	6.2956	gi|241659425|emb|CAZ65619.1|	219	4e-56	cytochrome P450 [Cnaphalocrocis medinalis]
CL1082.Contig1_CmRNA	789	273	39.482	gi|149393001|gb|ABR26563.1|	53.5	1e-09	truncated cytochrome P450 [Helicoverpa zea] >gi|149393003|gb|ABR26564.1| truncated cytochrome P450 [Helicoverpa zea]
CL1082.Contig2_CmRNA	737	120	18.5792	gi|149393001|gb|ABR26563.1|	53.5	1e-09	truncated cytochrome P450 [Helicoverpa zea] >gi|149393003|gb|ABR26564.1| truncated cytochrome P450 [Helicoverpa zea]
CL1082.Contig3_CmRNA	708	161	25.9481	gi|149393001|gb|ABR26563.1|	53.5	3e-10	truncated cytochrome P450 [Helicoverpa zea] >gi|149393003|gb|ABR26564.1| truncated cytochrome P450 [Helicoverpa zea]
CL1083.Contig1_CmRNA	1519	2277	171.048	gi|328786724|ref|XP_395500.4|	152	5e-35	PREDICTED: DNA replication licensing factor MCM8 [Apis mellifera]
CL1083.Contig2_CmRNA	1486	391	30.0242	gi|328786724|ref|XP_395500.4|	139	5e-31	PREDICTED: DNA replication licensing factor MCM8 [Apis mellifera]
CL1084.Contig1_CmRNA	327	20	6.979	gi|195578578|ref|XP_002079142.1|	135	5e-31	GD22157 [Drosophila simulans] >gi|194191151|gb|EDX04727.1| GD22157 [Drosophila simulans]
CL1086.Contig1_CmRNA	757	144	21.706	gi|156540509|ref|XP_001599077.1|	80.5	7e-14	PREDICTED: similar to pol polyprotein, partial [Nasonia vitripennis]
CL1087.Contig1_CmRNA	1495	66	5.0375	gi|91082165|ref|XP_970726.1|	322	4e-86	PREDICTED: similar to carnitine o-acetyltransferase [Tribolium castaneum]
CL1087.Contig2_CmRNA	1450	59	4.643	gi|91082165|ref|XP_970726.1|	322	4e-86	PREDICTED: similar to carnitine o-acetyltransferase [Tribolium castaneum]
CL1091.Contig3_CmRNA	1850	552	34.0472	gi|113865941|ref|NP_001038956.1|	261	6e-68	ecdysteroid 22-kinase [Bombyx mori] >gi|111924417|dbj|BAF02792.1| ecdysteroid 22-phosphate [Bombyx mori]
CL1092.Contig1_CmRNA	350	44	14.3449	gi|298204337|gb|ADI61817.1|	79	7e-15	endonuclease-reverse transcriptase [Bombyx mori]
CL1095.Contig1_CmRNA	916	111	13.8274	gi|114051706|ref|NP_001040425.1|	230	6e-59	antennal-enriched UDP-glycosyltransferase [Bombyx mori] >gi|95102846|gb|ABF51364.1| antennal-enriched UDP-glycosyltransferase [Bombyx mori]
CL1095.Contig2_CmRNA	1237	292	26.9356	gi|114051706|ref|NP_001040425.1|	352	3e-95	antennal-enriched UDP-glycosyltransferase [Bombyx mori] >gi|95102846|gb|ABF51364.1| antennal-enriched UDP-glycosyltransferase [Bombyx mori]
CL1097.Contig1_CmRNA	1421	512	41.114	gi|9837385|gb|AAG00554.1|AF286475_1	78.6	7e-13	retinitis pigmentosa GTPase regulator-like protein [Takifugu rubripes]
CL1098.Contig1_CmRNA	1291	330	29.1676	gi|156547534|ref|XP_001607285.1|	170	1e-40	PREDICTED: apolipoprotein D-like isoform 1 [Nasonia vitripennis] >gi|345485043|ref|XP_003425180.1| PREDICTED: apolipoprotein D-like isoform 2 [Nasonia vitripennis]
CL1099.Contig1_CmRNA	2839	4746	190.755	gi|345488586|ref|XP_001602460.2|	1651	0	PREDICTED: elongation factor 2-like [Nasonia vitripennis]
CL110.Contig1_CmRNA	689	99	16.3957	gi|328697880|ref|XP_003240464.1|	83.6	7e-15	PREDICTED: supervillin-like isoform 2 [Acyrthosiphon pisum]
CL1100.Contig1_CmRNA	2268	1169	58.8146	gi|156548356|ref|XP_001603617.1|	931	0	PREDICTED: electron transfer flavoprotein-ubiquinone oxidoreductase, mitochondrial-like [Nasonia vitripennis]
CL111.Contig1_CmRNA	881	3565	461.74	gi|146327864|emb|CAM84319.1|	303	5e-81	chymotrypsinogen-like protein 4 [Manduca sexta]
CL111.Contig2_CmRNA	263	19	8.2435	gi|146327862|emb|CAM84318.1|	59.7	4e-08	chymotrypsinogen-like protein 3 [Manduca sexta]
CL111.Contig3_CmRNA	326	655	229.265	gi|304443615|gb|ACR15983.2|	85.1	8e-16	serine protease 33 [Mamestra configurata]
CL1111.Contig1_CmRNA	578	5	0.9871	gi|91093064|ref|XP_968013.1|	201	2e-50	PREDICTED: similar to CG2926 CG2926-PA [Tribolium castaneum]
CL1111.Contig2_CmRNA	563	24	4.8643	gi|91093064|ref|XP_968013.1|	207	2e-52	PREDICTED: similar to CG2926 CG2926-PA [Tribolium castaneum]
CL1114.Contig1_CmRNA	365	38	11.8797	gi|148298736|ref|NP_001091758.1|	196	3e-49	annexin isoform 1 [Bombyx mori] >gi|87248453|gb|ABD36279.1| annexin isoform 1 [Bombyx mori]
CL1114.Contig2_CmRNA	288	27	10.6976	gi|148298736|ref|NP_001091758.1|	159	4e-38	annexin isoform 1 [Bombyx mori] >gi|87248453|gb|ABD36279.1| annexin isoform 1 [Bombyx mori]
CL1115.Contig1_CmRNA	1558	3	0.2197	gi|195478249|ref|XP_002100455.1|	263	1e-68	GE17063 [Drosophila yakuba] >gi|194187979|gb|EDX01563.1| GE17063 [Drosophila yakuba]
CL1115.Contig2_CmRNA	1526	8	0.5982	gi|195478249|ref|XP_002100455.1|	263	1e-68	GE17063 [Drosophila yakuba] >gi|194187979|gb|EDX01563.1| GE17063 [Drosophila yakuba]
CL1119.Contig1_CmRNA	2701	1549	65.4396	gi|345485882|ref|XP_001602506.2|	634	1e-180	PREDICTED: serine/threonine-protein phosphatase 2A catalytic subunit alpha isoform-like [Nasonia vitripennis]
CL1119.Contig3_CmRNA	816	46	6.4325	gi|91079100|ref|XP_975321.1|	144	6e-33	PREDICTED: similar to CG33232 CG33232-PC [Tribolium castaneum]
CL1121.Contig1_CmRNA	1051	59	6.4056	gi|332030782|gb|EGI70458.1|	497	1e-139	Ubiquitin carboxyl-terminal hydrolase 7 [Acromyrmex echinatior]
CL1121.Contig2_CmRNA	1168	40	3.9078	gi|332030782|gb|EGI70458.1|	501	1e-140	Ubiquitin carboxyl-terminal hydrolase 7 [Acromyrmex echinatior]
CL1122.Contig1_CmRNA	1389	1695	139.245	gi|195454847|ref|XP_002074434.1|	47	2e-08	GK10515 [Drosophila willistoni] >gi|194170519|gb|EDW85420.1| GK10515 [Drosophila willistoni]
CL1124.Contig1_CmRNA	378	3	0.9056	gi|297263005|ref|XP_001117606.2|	53.5	3e-06	PREDICTED: pleckstrin homology-like domain family A member 1-like isoform 1 [Macaca mulatta]
CL1125.Contig1_CmRNA	1595	192	13.7358	gi|223006754|gb|ACM69342.1|	141	8e-32	gloverin [Plutella xylostella]
CL1125.Contig2_CmRNA	1356	313	26.3389	gi|223006754|gb|ACM69342.1|	141	6e-32	gloverin [Plutella xylostella]
CL1125.Contig3_CmRNA	1285	2764	245.442	gi|110649240|emb|CAL25129.1|	148	6e-34	gloverin [Manduca sexta]
CL1128.Contig1_CmRNA	967	102	12.0361	gi|156547852|ref|XP_001605005.1|	364	3e-99	PREDICTED: GTP-binding protein SAR1b-like isoform 2 [Nasonia vitripennis] >gi|156547854|ref|XP_001604983.1| PREDICTED: GTP-binding protein SAR1b-like isoform 1 [Nasonia vitripennis] >gi|345485411|ref|XP_003425264.1| PREDICTED: GTP-binding protein SAR1b-like [Nasonia vitripennis]
CL1128.Contig2_CmRNA	873	22	2.8756	gi|156547852|ref|XP_001605005.1|	364	2e-99	PREDICTED: GTP-binding protein SAR1b-like isoform 2 [Nasonia vitripennis] >gi|156547854|ref|XP_001604983.1| PREDICTED: GTP-binding protein SAR1b-like isoform 1 [Nasonia vitripennis] >gi|345485411|ref|XP_003425264.1| PREDICTED: GTP-binding protein SAR1b-like [Nasonia vitripennis]
CL1133.Contig1_CmRNA	760	323	48.4956	gi|290559935|ref|NP_001166792.1|	201	4e-50	cuticular protein glycine-rich 10 [Bombyx mori]
CL1133.Contig2_CmRNA	559	81	16.5343	gi|290559935|ref|NP_001166792.1|	155	9e-37	cuticular protein glycine-rich 10 [Bombyx mori]
CL1139.Contig1_CmRNA	461	405	100.246	gi|215820602|ref|NP_001135960.1|	241	5e-63	uridine diphosphate glucosyltransferase [Bombyx mori] >gi|213494483|gb|ACJ48963.1| uridine diphosphate glucosyltransferase [Bombyx mori]
CL114.Contig1_CmRNA	603	148	28.0064	gi|66513379|ref|XP_624457.1|	235	1e-60	PREDICTED: transcription elongation factor SPT4 isoform 2 [Apis mellifera]
CL114.Contig2_CmRNA	303	33	12.4275	gi|66513379|ref|XP_624457.1|	191	6e-48	PREDICTED: transcription elongation factor SPT4 isoform 2 [Apis mellifera]
CL1140.Contig1_CmRNA	316	20	7.222	gi|298204323|gb|ADI61810.1|	55.8	6e-10	endonuclease-reverse transcriptase [Bombyx mori]
CL1140.Contig2_CmRNA	315	0	0	gi|298204323|gb|ADI61810.1|	55.8	8e-10	endonuclease-reverse transcriptase [Bombyx mori]
CL1145.Contig1_CmRNA	202	4	2.2596	gi|319803029|ref|NP_001188364.1|	101	9e-21	polyhomeotic [Bombyx mori] >gi|317175917|dbj|BAJ54074.1| polyhomeotic [Bombyx mori]
CL1146.Contig1_CmRNA	457	16	3.995	gi|307190255|gb|EFN74362.1|	157	1e-37	Myelin transcription factor 1 [Camponotus floridanus]
CL1150.Contig1_CmRNA	1079	17	1.7978	gi|92096349|gb|AAI15131.1|	211	6e-53	Pih1d1 protein [Danio rerio]
CL1150.Contig2_CmRNA	1054	77	8.3361	gi|92096349|gb|AAI15131.1|	210	1e-52	Pih1d1 protein [Danio rerio]
CL1151.Contig1_CmRNA	523	152	33.1631	gi|237649002|ref|NP_001153678.1|	55.5	1e-06	hypothetical protein LOC100301511 [Bombyx mori] >gi|225580687|gb|ACN94451.1| hypothetical midgut protein Bm123 [Bombyx mori]
CL1153.Contig1_CmRNA	727	85	13.3413	gi|31224828|ref|XP_317494.1|	154	5e-36	AGAP007974-PA [Anopheles gambiae str. PEST] >gi|75010140|sp|Q7PN68.1|DRM_ANOGA RecName: Full=Protein drumstick >gi|30175441|gb|EAA12665.2| AGAP007974-PA [Anopheles gambiae str. PEST]
CL1153.Contig2_CmRNA	694	15	2.4663	gi|31224828|ref|XP_317494.1|	154	4e-36	AGAP007974-PA [Anopheles gambiae str. PEST] >gi|75010140|sp|Q7PN68.1|DRM_ANOGA RecName: Full=Protein drumstick >gi|30175441|gb|EAA12665.2| AGAP007974-PA [Anopheles gambiae str. PEST]
CL1156.Contig1_CmRNA	268	7	2.9804	gi|57506562|dbj|BAD86652.1|	86.7	3e-16	reverse transcriptase [Bombyx mori]
CL1157.Contig1_CmRNA	475	36	8.6481	gi|91090878|ref|XP_973087.1|	72.4	6e-12	PREDICTED: similar to Inositol 1,4,5-triphosphate kinase 1 CG4026-PA [Tribolium castaneum]
CL1157.Contig2_CmRNA	356	15	4.8079	gi|91090878|ref|XP_973087.1|	72.4	6e-12	PREDICTED: similar to Inositol 1,4,5-triphosphate kinase 1 CG4026-PA [Tribolium castaneum]
CL1164.Contig1_CmRNA	1064	269	28.8486	gi|91083579|ref|XP_968212.1|	611	1e-173	PREDICTED: similar to lysyl-tRNA synthetase [Tribolium castaneum]
CL1166.Contig1_CmRNA	652	8	1.4001	gi|170044358|ref|XP_001849818.1|	202	9e-51	kinesin-associated protein [Culex quinquefasciatus] >gi|167867535|gb|EDS30918.1| kinesin-associated protein [Culex quinquefasciatus]
CL1166.Contig2_CmRNA	578	4	0.7897	gi|170044358|ref|XP_001849818.1|	202	7e-51	kinesin-associated protein [Culex quinquefasciatus] >gi|167867535|gb|EDS30918.1| kinesin-associated protein [Culex quinquefasciatus]
CL1167.Contig2_CmRNA	582	226	44.3097	gi|299930615|gb|ADJ58523.1|	76.6	6e-13	seminal fluid protein HACP020 [Heliconius erato]
CL1168.Contig1_CmRNA	473	68	16.4044	gi|198429319|ref|XP_002126067.1|	60.5	2e-08	PREDICTED: similar to trefoil factor [Ciona intestinalis]
CL1169.Contig1_CmRNA	2025	9	0.5071	gi|189242322|ref|XP_001811280.1|	577	1e-163	PREDICTED: similar to polyprotein [Tribolium castaneum]
CL1169.Contig2_CmRNA	2018	15	0.8482	gi|189242322|ref|XP_001811280.1|	560	1e-158	PREDICTED: similar to polyprotein [Tribolium castaneum]
CL1170.Contig1_CmRNA	473	37	8.9259	gi|345489149|ref|XP_001600617.2|	204	1e-51	PREDICTED: glutamyl aminopeptidase-like [Nasonia vitripennis]
CL1171.Contig1_CmRNA	1575	223	16.1562	gi|307203244|gb|EFN82399.1|	319	2e-85	Ubiquitin domain-containing protein UBFD1 [Harpegnathos saltator]
CL1171.Contig2_CmRNA	1521	18	1.3504	gi|307203244|gb|EFN82399.1|	317	1e-84	Ubiquitin domain-containing protein UBFD1 [Harpegnathos saltator]
CL1172.Contig1_CmRNA	200	14	7.9875	gi|37590255|gb|AAH59189.1|	55.1	9e-07	Zgc:64189 [Danio rerio]
CL1173.Contig1_CmRNA	809	2026	285.762	gi|315115333|gb|ADT80639.1|	383	1e-105	ribosomal biogenesis protein RLP24 [Euphydryas aurinia]
CL1176.Contig1_CmRNA	577	83	16.4141	gi|340713011|ref|XP_003395045.1|	149	5e-35	PREDICTED: coronin-2B-like isoform 3 [Bombus terrestris]
CL1180.Contig1_CmRNA	523	21	4.5817	gi|195386320|ref|XP_002051852.1|	190	2e-47	GJ17227 [Drosophila virilis] >gi|194148309|gb|EDW64007.1| GJ17227 [Drosophila virilis]
CL1180.Contig2_CmRNA	352	1	0.3242	gi|195386320|ref|XP_002051852.1|	140	2e-32	GJ17227 [Drosophila virilis] >gi|194148309|gb|EDW64007.1| GJ17227 [Drosophila virilis]
CL1181.Contig1_CmRNA	1116	22	2.2494	gi|189240267|ref|XP_971538.2|	247	6e-64	PREDICTED: similar to CG18136 CG18136-PA [Tribolium castaneum]
CL1181.Contig2_CmRNA	1094	13	1.3559	gi|189240267|ref|XP_971538.2|	247	6e-64	PREDICTED: similar to CG18136 CG18136-PA [Tribolium castaneum]
CL1182.Contig1_CmRNA	871	136	17.817	gi|195381587|ref|XP_002049529.1|	54.3	7e-06	GJ21639 [Drosophila virilis] >gi|194144326|gb|EDW60722.1| GJ21639 [Drosophila virilis]
CL1187.Contig1_CmRNA	524	49	10.6703	gi|343961221|dbj|BAK62200.1|	78.2	2e-13	nuclear pore complex interacting protein [Pan troglodytes]
CL1189.Contig1_CmRNA	767	38	5.6533	gi|339773549|gb|AEK05181.1|	246	6e-64	methyl-binding protein [Schistocerca gregaria]
CL1189.Contig2_CmRNA	617	21	3.8837	gi|91079510|ref|XP_969537.1|	233	4e-60	PREDICTED: similar to methyl-cpg binding protein [Tribolium castaneum]
CL119.Contig1_CmRNA	839	151454	20598.3	gi|198460119|ref|XP_002138784.1|	72.4	2e-11	GA24203 [Drosophila pseudoobscura pseudoobscura] >gi|198136908|gb|EDY69342.1| GA24203 [Drosophila pseudoobscura pseudoobscura]
CL1190.Contig1_CmRNA	217	11	5.7842	gi|58383228|ref|XP_312466.2|	71.6	1e-11	AGAP002472-PA [Anopheles gambiae str. PEST] >gi|55242305|gb|EAA08181.2| AGAP002472-PA [Anopheles gambiae str. PEST]
CL1190.Contig2_CmRNA	206	12	6.647	gi|58383228|ref|XP_312466.2|	71.6	1e-11	AGAP002472-PA [Anopheles gambiae str. PEST] >gi|55242305|gb|EAA08181.2| AGAP002472-PA [Anopheles gambiae str. PEST]
CL1192.Contig1_CmRNA	526	6	1.3016	gi|193664727|ref|XP_001950966.1|	245	7e-64	PREDICTED: zinc transporter 1-like [Acyrthosiphon pisum]
CL1192.Contig2_CmRNA	514	20	4.44	gi|157127704|ref|XP_001661141.1|	223	4e-57	cation efflux protein/ zinc transporter [Aedes aegypti] >gi|108872840|gb|EAT37065.1| cation efflux protein/ zinc transporter [Aedes aegypti]
CL1196.Contig1_CmRNA	474	79	19.0179	gi|307191147|gb|EFN74845.1|	80.1	3e-14	WD repeat-containing protein 65 [Camponotus floridanus]
CL1199.Contig1_CmRNA	1144	415	41.3938	gi|124109902|gb|ABM91320.1|	577	1e-163	integrin beta 1 precursor [Ostrinia furnacalis]
CL12.Contig1_CmRNA	684	10	1.6682	gi|195119532|ref|XP_002004285.1|	155	1e-36	GI19695 [Drosophila mojavensis] >gi|193909353|gb|EDW08220.1| GI19695 [Drosophila mojavensis]
CL12.Contig2_CmRNA	654	11	1.9192	gi|195119532|ref|XP_002004285.1|	155	1e-36	GI19695 [Drosophila mojavensis] >gi|193909353|gb|EDW08220.1| GI19695 [Drosophila mojavensis]
CL120.Contig1_CmRNA	1003	826	93.9708	gi|74876134|sp|Q75JC9.1|Y8484_DICDI	167	7e-40	RecName: Full=Uncharacterized protein DDB_G0271670; Flags: Precursor
CL120.Contig2_CmRNA	1028	482	53.5017	gi|74876134|sp|Q75JC9.1|Y8484_DICDI	167	6e-40	RecName: Full=Uncharacterized protein DDB_G0271670; Flags: Precursor
CL1201.Contig1_CmRNA	257	5	2.22	gi|344240643|gb|EGV96746.1|	65.9	5e-10	Cornifin-B [Cricetulus griseus]
CL1201.Contig2_CmRNA	220	12	6.224	gi|1487990|emb|CAA68173.1|	71.2	1e-11	ott [Rattus norvegicus]
CL1204.Contig1_CmRNA	1709	52	3.472	gi|195064833|ref|XP_001996646.1|	117	2e-24	GH22520 [Drosophila grimshawi] >gi|193895424|gb|EDV94290.1| GH22520 [Drosophila grimshawi]
CL1204.Contig2_CmRNA	1213	2	0.1881	gi|195435820|ref|XP_002065877.1|	107	9e-22	GK16328 [Drosophila willistoni] >gi|194161962|gb|EDW76863.1| GK16328 [Drosophila willistoni]
CL1206.Contig1_CmRNA	970	12	1.4116	gi|125978359|ref|XP_001353212.1|	244	4e-63	GA10415 [Drosophila pseudoobscura pseudoobscura] >gi|54641965|gb|EAL30714.1| GA10415 [Drosophila pseudoobscura pseudoobscura]
CL1206.Contig2_CmRNA	960	11	1.3075	gi|125978359|ref|XP_001353212.1|	244	4e-63	GA10415 [Drosophila pseudoobscura pseudoobscura] >gi|54641965|gb|EAL30714.1| GA10415 [Drosophila pseudoobscura pseudoobscura]
CL1206.Contig3_CmRNA	929	51	6.2642	gi|125978359|ref|XP_001353212.1|	244	4e-63	GA10415 [Drosophila pseudoobscura pseudoobscura] >gi|54641965|gb|EAL30714.1| GA10415 [Drosophila pseudoobscura pseudoobscura]
CL1216.Contig1_CmRNA	622	62	11.374	gi|307204446|gb|EFN83153.1|	267	3e-70	Histone H3.3 [Harpegnathos saltator]
CL1216.Contig2_CmRNA	612	93	17.3398	gi|334359125|pdb|3AV2|A	265	1e-69	Chain A, The Human Nucleosome Structure Containing The Histone Variant H3.3 >gi|334359129|pdb|3AV2|E Chain E, The Human Nucleosome Structure Containing The Histone Variant H3.3
CL1223.Contig1_CmRNA	8170	25948	362.406	gi|2498144|sp|Q25490.1|APLP_MANSE	2788	0	RecName: Full=Apolipophorins; Contains: RecName: Full=Apolipophorin-2; AltName: Full=Apolipophorin II; AltName: Full=apoLp-2; Contains: RecName: Full=Apolipophorin-1; AltName: Full=Apolipophorin I; AltName: Full=apoLp-1; Flags: Precursor >gi|1399218|gb|AAB53254.1| apolipophorin precursor protein [Manduca sexta]
CL1230.Contig1_CmRNA	621	47	8.6361	gi|298204363|gb|ADI61830.1|	209	9e-53	endonuclease-reverse transcriptase [Bombyx mori]
CL1233.Contig1_CmRNA	1162	127	12.4713	gi|34099638|gb|AAQ57129.1|	188	3e-59	endonuclease and reverse transcriptase-like protein [Bombyx mori]
CL1233.Contig2_CmRNA	230	10	4.9612	gi|34099638|gb|AAQ57129.1|	94.4	1e-18	endonuclease and reverse transcriptase-like protein [Bombyx mori]
CL1235.Contig1_CmRNA	786	13	1.8873	gi|270016460|gb|EFA12906.1|	70.1	1e-10	hypothetical protein TcasGA2_TC006975 [Tribolium castaneum]
CL1235.Contig2_CmRNA	770	5	0.741	gi|270016460|gb|EFA12906.1|	70.1	1e-10	hypothetical protein TcasGA2_TC006975 [Tribolium castaneum]
CL1238.Contig1_CmRNA	406	57	16.02	gi|114052613|ref|NP_001040544.1|	154	1e-36	transaldolase [Bombyx mori] >gi|95103094|gb|ABF51488.1| transaldolase [Bombyx mori]
CL1238.Contig2_CmRNA	374	31	9.4581	gi|114052613|ref|NP_001040544.1|	154	1e-36	transaldolase [Bombyx mori] >gi|95103094|gb|ABF51488.1| transaldolase [Bombyx mori]
CL1241.Contig1_CmRNA	710	37	5.9464	gi|1698453|gb|AAB47739.1|	107	6e-37	transposase [Bombyx mori]
CL1241.Contig2_CmRNA	292	14	5.4709	gi|222425220|dbj|BAH20555.1|	53.5	3e-06	transposase [Bombyx mandarina]
CL1243.Contig1_CmRNA	813	111	15.5792	gi|91082317|ref|XP_974328.1|	133	8e-30	PREDICTED: similar to CG6621 CG6621-PA [Tribolium castaneum]
CL1243.Contig2_CmRNA	695	12	1.9702	gi|91082317|ref|XP_974328.1|	83.6	7e-15	PREDICTED: similar to CG6621 CG6621-PA [Tribolium castaneum]
CL1243.Contig3_CmRNA	360	8	2.5357	gi|307190545|gb|EFN74532.1|	71.6	1e-11	Tetratricopeptide repeat protein 14 [Camponotus floridanus]
CL1244.Contig1_CmRNA	1298	199	17.4941	gi|307214185|gb|EFN89302.1|	177	1e-42	Cubilin [Harpegnathos saltator]
CL1246.Contig1_CmRNA	378	37	11.1692	gi|189241164|ref|XP_974773.2|	118	7e-26	PREDICTED: similar to guanine nucleotide exchange factor [Tribolium castaneum]
CL125.Contig1_CmRNA	2374	381	18.3129	gi|189235405|ref|XP_970717.2|	189	5e-46	PREDICTED: similar to T19B10.5 [Tribolium castaneum]
CL1252.Contig1_CmRNA	381	1263	378.261	gi|291225862|ref|XP_002732917.1|	124	1e-27	PREDICTED: zonadhesin-like, partial [Saccoglossus kowalevskii]
CL1254.Contig1_CmRNA	1668	131	8.9617	gi|170030940|ref|XP_001843345.1|	255	5e-66	aspartyl/asparaginyl beta-hydroxylase [Culex quinquefasciatus] >gi|167868825|gb|EDS32208.1| aspartyl/asparaginyl beta-hydroxylase [Culex quinquefasciatus]
CL1254.Contig2_CmRNA	2343	339	16.5098	gi|195430618|ref|XP_002063351.1|	307	2e-81	GK21857 [Drosophila willistoni] >gi|194159436|gb|EDW74337.1| GK21857 [Drosophila willistoni]
CL1256.Contig1_CmRNA	2700	146	6.1702	gi|156549539|ref|XP_001603044.1|	468	1e-130	PREDICTED: similar to ENSANGP00000014982 isoform 2 [Nasonia vitripennis]
CL1256.Contig2_CmRNA	2700	88	3.7191	gi|156549539|ref|XP_001603044.1|	443	1e-122	PREDICTED: similar to ENSANGP00000014982 isoform 2 [Nasonia vitripennis]
CL1258.Contig1_CmRNA	583	17	3.3273	gi|195432370|ref|XP_002064196.1|	112	7e-24	GK20036 [Drosophila willistoni] >gi|194160281|gb|EDW75182.1| GK20036 [Drosophila willistoni]
CL1258.Contig2_CmRNA	1443	212	16.7642	gi|195432370|ref|XP_002064196.1|	194	9e-48	GK20036 [Drosophila willistoni] >gi|194160281|gb|EDW75182.1| GK20036 [Drosophila willistoni]
CL1259.Contig1_CmRNA	417	357	97.689	gi|66827917|ref|XP_647313.1|	71.6	1e-11	initiation factor eIF-4 gamma middle domain-containing protein [Dictyostelium discoideum AX4] >gi|60475416|gb|EAL73351.1| initiation factor eIF-4 gamma middle domain-containing protein [Dictyostelium discoideum AX4]
CL1259.Contig2_CmRNA	783	636	92.6849	gi|209875545|ref|XP_002139215.1|	87.8	5e-16	RNA recognition motif. family protein [Cryptosporidium muris RN66] >gi|209554821|gb|EEA04866.1| RNA recognition motif. family protein [Cryptosporidium muris RN66]
CL1261.Contig1_CmRNA	1072	931	99.0988	gi|195434869|ref|XP_002065424.1|	63.5	2e-08	GK15443 [Drosophila willistoni] >gi|194161509|gb|EDW76410.1| GK15443 [Drosophila willistoni]
CL1263.Contig1_CmRNA	250	7	3.195	gi|298286476|ref|NP_001177233.1|	53.9	2e-06	hemicentin 1 [Danio rerio] >gi|297578316|gb|ADI46643.1| hemicentin1 protein [Danio rerio]
CL1264.Contig1_CmRNA	4693	67	1.6291	gi|194759622|ref|XP_001962046.1|	656	0	GF15269 [Drosophila ananassae] >gi|190615743|gb|EDV31267.1| GF15269 [Drosophila ananassae]
CL1264.Contig2_CmRNA	4583	0	0	gi|194759622|ref|XP_001962046.1|	656	0	GF15269 [Drosophila ananassae] >gi|190615743|gb|EDV31267.1| GF15269 [Drosophila ananassae]
CL1264.Contig3_CmRNA	1005	0	0	gi|239788984|dbj|BAH71142.1|	229	1e-58	ACYPI009245 [Acyrthosiphon pisum]
CL1265.Contig1_CmRNA	525	82	17.8225	gi|328777929|ref|XP_003249419.1|	77.8	2e-13	PREDICTED: UDP-N-acetylglucosamine--peptide N-acetylglucosaminyltransferase 110 kDa subunit isoform 1 [Apis mellifera]
CL1269.Contig1_CmRNA	355	21	6.75	gi|340716513|ref|XP_003396742.1|	121	1e-26	PREDICTED: cell cycle control protein 50A-like [Bombus terrestris]
CL1272.Contig1_CmRNA	1259	57	5.1661	gi|338720832|ref|XP_003364259.1|	70.5	2e-10	PREDICTED: keratin-associated protein 10-3-like [Equus caballus]
CL1272.Contig2_CmRNA	899	139	17.6429	gi|332847622|ref|XP_003315490.1|	52.4	3e-12	PREDICTED: LOW QUALITY PROTEIN: keratin associated protein 4-3 [Pan troglodytes]
CL1276.Contig1_CmRNA	1894	611	36.8108	gi|345492726|ref|XP_003426915.1|	632	1e-179	PREDICTED: xaa-Pro dipeptidase-like isoform 3 [Nasonia vitripennis]
CL1278.Contig1_CmRNA	881	265	34.3229	gi|169234669|ref|NP_001108456.1|	379	1e-103	cytochrome P450 9G3 [Bombyx mori] >gi|167473193|gb|ABZ81070.1| CYP9G3 [Bombyx mori]
CL1278.Contig2_CmRNA	253	17	7.6673	gi|169234669|ref|NP_001108456.1|	98.6	7e-20	cytochrome P450 9G3 [Bombyx mori] >gi|167473193|gb|ABZ81070.1| CYP9G3 [Bombyx mori]
CL128.Contig1_CmRNA	1095	15	1.5631	gi|2055276|dbj|BAA19776.1|	58.5	5e-07	Pol protein [Bombyx mori]
CL128.Contig2_CmRNA	1086	46	4.8333	gi|2055276|dbj|BAA19776.1|	58.9	4e-07	Pol protein [Bombyx mori]
CL1280.Contig1_CmRNA	303	394	148.377	gi|146737998|gb|ABQ42577.1|	81.3	1e-14	moricin-like peptide C3 [Galleria mellonella]
CL1280.Contig2_CmRNA	230	161	79.8751	gi|146738002|gb|ABQ42579.1|	79	6e-14	moricin-like peptide C5 [Galleria mellonella]
CL1280.Contig3_CmRNA	233	79	38.6888	gi|146738002|gb|ABQ42579.1|	73.6	2e-12	moricin-like peptide C5 [Galleria mellonella]
CL1281.Contig1_CmRNA	5599	3332	67.906	gi|189238710|ref|XP_969341.2|	1196	0	PREDICTED: similar to AGAP009638-PA [Tribolium castaneum]
CL1281.Contig2_CmRNA	385	82	24.3034	gi|156552908|ref|XP_001601485.1|	187	1e-46	PREDICTED: similar to CG30069-PA [Nasonia vitripennis]
CL1281.Contig3_CmRNA	295	36	13.925	gi|156552908|ref|XP_001601485.1|	151	9e-36	PREDICTED: similar to CG30069-PA [Nasonia vitripennis]
CL1281.Contig4_CmRNA	461	34	8.4157	gi|189238710|ref|XP_969341.2|	160	1e-38	PREDICTED: similar to AGAP009638-PA [Tribolium castaneum]
CL1282.Contig1_CmRNA	3379	246	8.3073	gi|307212293|gb|EFN88101.1|	692	0	Serine/threonine-protein phosphatase 1 regulatory subunit 10 [Harpegnathos saltator]
CL1282.Contig2_CmRNA	2032	68	3.8186	gi|332019174|gb|EGI59684.1|	355	4e-96	Serine/threonine-protein phosphatase 1 regulatory subunit 10 [Acromyrmex echinatior]
CL1284.Contig1_CmRNA	892	21	2.6864	gi|189237178|ref|XP_966378.2|	120	6e-26	PREDICTED: similar to katanin p80 subunit, partial [Tribolium castaneum]
CL1284.Contig2_CmRNA	835	8	1.0932	gi|189237178|ref|XP_966378.2|	95.9	2e-18	PREDICTED: similar to katanin p80 subunit, partial [Tribolium castaneum]
CL1288.Contig1_CmRNA	1150	369	36.6136	gi|282848147|ref|NP_001164292.1|	209	2e-52	kayak isoform A [Tribolium castaneum] >gi|270014251|gb|EFA10699.1| kayak [Tribolium castaneum]
CL1288.Contig2_CmRNA	1036	133	14.6489	gi|282848151|ref|NP_001164294.1|	202	3e-50	kayak isoform C [Tribolium castaneum]
CL129.Contig1_CmRNA	1672	34	2.3204	gi|91081335|ref|XP_967042.1|	700	0	PREDICTED: similar to phosphorylase b kinase regulatory subunit alpha isoform 1 [Tribolium castaneum]
CL129.Contig2_CmRNA	1627	25	1.7533	gi|91081335|ref|XP_967042.1|	710	0	PREDICTED: similar to phosphorylase b kinase regulatory subunit alpha isoform 1 [Tribolium castaneum]
CL1291.Contig1_CmRNA	837	36	4.9078	gi|48112712|ref|XP_396337.1|	473	1e-132	PREDICTED: protein N-terminal asparagine amidohydrolase-like [Apis mellifera]
CL1291.Contig2_CmRNA	789	26	3.7602	gi|48112712|ref|XP_396337.1|	473	1e-132	PREDICTED: protein N-terminal asparagine amidohydrolase-like [Apis mellifera]
CL1292.Contig1_CmRNA	1642	972	67.5471	gi|312451917|gb|ADQ86007.1|	374	1e-102	death-associated LIM-only protein [Helicoverpa armigera]
CL1296.Contig1_CmRNA	614	2	0.3717	gi|124801210|ref|XP_001349633.1|	107	3e-22	conserved Plasmodium protein [Plasmodium falciparum 3D7] >gi|3845221|gb|AAC71904.1| conserved Plasmodium protein [Plasmodium falciparum 3D7]
CL1296.Contig2_CmRNA	560	18	3.6677	gi|124801210|ref|XP_001349633.1|	107	4e-22	conserved Plasmodium protein [Plasmodium falciparum 3D7] >gi|3845221|gb|AAC71904.1| conserved Plasmodium protein [Plasmodium falciparum 3D7]
CL1299.Contig1_CmRNA	1261	115	10.4063	gi|334683151|emb|CBY85302.1|	614	1e-174	P102 protein [Heliothis virescens]
CL1299.Contig2_CmRNA	1256	63	5.7235	gi|334683151|emb|CBY85302.1|	614	1e-174	P102 protein [Heliothis virescens]
CL1299.Contig3_CmRNA	1246	94	8.6084	gi|334683151|emb|CBY85302.1|	614	1e-174	P102 protein [Heliothis virescens]
CL13.Contig1_CmRNA	394	16	4.6338	gi|91094191|ref|XP_971121.1|	214	1e-54	PREDICTED: similar to TFIIH basal transcription factor complex p52 subunit [Tribolium castaneum]
CL13.Contig2_CmRNA	209	1	0.546	gi|345492819|ref|XP_001602702.2|	100	3e-20	PREDICTED: general transcription factor IIH subunit 4-like [Nasonia vitripennis]
CL1304.Contig1_CmRNA	487	4291	1005.41	gi|13810820|gb|AAK40037.1|	77.4	2e-13	silk protease inhibitor 1 precursor [Galleria mellonella]
CL1305.Contig1_CmRNA	1013	255	28.724	gi|157122007|ref|XP_001659917.1|	311	3e-83	adenylate cyclase [Aedes aegypti] >gi|108874606|gb|EAT38831.1| adenylate cyclase [Aedes aegypti]
CL1309.Contig1_CmRNA	736	191	29.6121	gi|307169864|gb|EFN62373.1|	310	3e-83	Nucleoplasmin-like protein [Camponotus floridanus]
CL1309.Contig2_CmRNA	696	92	15.0832	gi|307169864|gb|EFN62373.1|	257	4e-67	Nucleoplasmin-like protein [Camponotus floridanus]
CL1310.Contig1_CmRNA	665	22	3.775	gi|307186890|gb|EFN72291.1|	315	1e-84	Ubiquitin-conjugating enzyme E2-17 kDa [Camponotus floridanus]
CL1310.Contig2_CmRNA	648	40	7.0437	gi|340713047|ref|XP_003395063.1|	329	5e-89	PREDICTED: ubiquitin-conjugating enzyme E2-17 kDa-like isoform 2 [Bombus terrestris]
CL1311.Contig1_CmRNA	2453	863	40.1446	gi|91080563|ref|XP_973259.1|	680	0	PREDICTED: similar to alpha-N-acetyl glucosaminidase [Tribolium castaneum]
CL1314.Contig1_CmRNA	434	27	7.0988	gi|57506562|dbj|BAD86652.1|	94.7	1e-18	reverse transcriptase [Bombyx mori]
CL1314.Contig2_CmRNA	387	1	0.2949	gi|57506562|dbj|BAD86652.1|	61.2	1e-08	reverse transcriptase [Bombyx mori]
CL1318.Contig1_CmRNA	500	1190	271.575	gi|157820841|ref|NP_001103124.1|	67	3e-10	platelet glycoprotein Ib alpha chain [Rattus norvegicus] >gi|149053210|gb|EDM05027.1| rCG34279 [Rattus norvegicus]
CL1319.Contig1_CmRNA	1259	350	31.7217	gi|328787929|ref|XP_395212.4|	664	0	PREDICTED: spectrin beta chain [Apis mellifera]
CL132.Contig1_CmRNA	634	35	6.2993	gi|27733413|gb|AAO21504.1|AF413063_1	355	6e-97	zinc metalloprotease [Manduca sexta]
CL132.Contig2_CmRNA	586	9	1.7525	gi|27733413|gb|AAO21504.1|AF413063_1	318	1e-85	zinc metalloprotease [Manduca sexta]
CL1322.Contig1_CmRNA	711	2125	341.038	gi|74876134|sp|Q75JC9.1|Y8484_DICDI	97.8	4e-19	RecName: Full=Uncharacterized protein DDB_G0271670; Flags: Precursor
CL1329.Contig1_CmRNA	542	88	18.5267	gi|338807801|gb|AEJ07664.1|	148	1e-34	G protein gamma subunit [Bombyx mori]
CL1329.Contig2_CmRNA	270	25	10.5655	gi|307214704|gb|EFN89633.1|	130	1e-29	Guanine nucleotide-binding protein subunit gamma-e [Harpegnathos saltator]
CL1330.Contig1_CmRNA	1186	51	4.9068	gi|189242495|ref|XP_972404.2|	281	6e-74	PREDICTED: similar to CG9134 CG9134-PB [Tribolium castaneum]
CL1330.Contig2_CmRNA	1117	51	5.2099	gi|189242495|ref|XP_972404.2|	283	8e-75	PREDICTED: similar to CG9134 CG9134-PB [Tribolium castaneum]
CL1333.Contig1_CmRNA	390	75	21.9437	gi|307174076|gb|EFN64763.1|	261	9e-69	Vacuolar ATP synthase subunit B [Camponotus floridanus]
CL1333.Contig2_CmRNA	1805	1840	116.32	gi|401327|sp|P31401.1|VATB_MANSE	973	0	RecName: Full=V-type proton ATPase subunit B; Short=V-ATPase subunit B; AltName: Full=Vacuolar proton pump subunit B >gi|9714|emb|CAA45706.1| H(+)-transporting ATPase [Manduca sexta]
CL1335.Contig1_CmRNA	868	62	8.1505	gi|23480555|gb|EAA17085.1|	139	2e-31	STARP antigen [Plasmodium yoelii yoelii]
CL1335.Contig2_CmRNA	488	27	6.3133	gi|23480555|gb|EAA17085.1|	85.9	6e-16	STARP antigen [Plasmodium yoelii yoelii]
CL1336.Contig1_CmRNA	1372	2008	167.003	gi|218436706|dbj|BAH03386.1|	735	0	acetyltransferase 1 [Ostrinia scapulalis]
CL1337.Contig1_CmRNA	575	20	3.969	gi|289741725|gb|ADD19610.1|	155	1e-36	synaptic vesicle transporter sVOP [Glossina morsitans morsitans]
CL1337.Contig2_CmRNA	542	5	1.0527	gi|289741725|gb|ADD19610.1|	153	3e-36	synaptic vesicle transporter sVOP [Glossina morsitans morsitans]
CL134.Contig1_CmRNA	1438	89	7.0623	gi|87248663|gb|ABD36384.1|	597	1e-169	transmembrane BAX inhibitor motif-containing protein 5 [Bombyx mori]
CL134.Contig2_CmRNA	1301	90	7.8937	gi|87248663|gb|ABD36384.1|	597	1e-169	transmembrane BAX inhibitor motif-containing protein 5 [Bombyx mori]
CL1344.Contig1_CmRNA	2370	228	10.9774	gi|91079214|ref|XP_969966.1|	340	2e-91	PREDICTED: similar to histidine triad protein member [Tribolium castaneum]
CL1344.Contig2_CmRNA	2101	59	3.2043	gi|194898873|ref|XP_001978987.1|	259	5e-67	GG10867 [Drosophila erecta] >gi|190650690|gb|EDV47945.1| GG10867 [Drosophila erecta]
CL1351.Contig1_CmRNA	456	16	4.0038	gi|83583697|gb|ABC24708.1|	94	2e-18	G protein-coupled receptor [Spodoptera frugiperda]
CL1353.Contig1_CmRNA	264	6	2.5933	gi|340726128|ref|XP_003401414.1|	68.6	1e-15	PREDICTED: LOW QUALITY PROTEIN: insulin-degrading enzyme-like [Bombus terrestris]
CL1353.Contig2_CmRNA	263	1	0.4339	gi|340726128|ref|XP_003401414.1|	84.7	2e-20	PREDICTED: LOW QUALITY PROTEIN: insulin-degrading enzyme-like [Bombus terrestris]
CL1355.Contig1_CmRNA	1472	2381	184.572	gi|308512763|gb|ADO33035.1|	823	0	proteasome 26S subunit 6A [Biston betularia]
CL1355.Contig2_CmRNA	212	24	12.9178	gi|340709555|ref|XP_003393371.1|	135	5e-31	PREDICTED: 26S protease regulatory subunit 6A-like [Bombus terrestris]
CL1356.Contig1_CmRNA	1613	309	21.8594	gi|195553243|ref|XP_002076628.1|	80.5	2e-13	GD15162 [Drosophila simulans] >gi|194202239|gb|EDX15815.1| GD15162 [Drosophila simulans]
CL1358.Contig1_CmRNA	2578	66	2.9213	gi|157127959|ref|XP_001661247.1|	186	6e-45	butyrate response factor 1 (TIS11B protein) [Aedes aegypti] >gi|108882307|gb|EAT46532.1| butyrate response factor 1 (TIS11B protein) [Aedes aegypti]
CL1358.Contig2_CmRNA	2620	89	3.8762	gi|157127959|ref|XP_001661247.1|	186	7e-45	butyrate response factor 1 (TIS11B protein) [Aedes aegypti] >gi|108882307|gb|EAT46532.1| butyrate response factor 1 (TIS11B protein) [Aedes aegypti]
CL1359.Contig1_CmRNA	1310	170	14.8078	gi|261335959|emb|CBH09292.1|	184	6e-59	HM00049 [Heliconius melpomene]
CL1359.Contig2_CmRNA	489	7	1.6334	gi|261335959|emb|CBH09292.1|	96.3	4e-19	HM00049 [Heliconius melpomene]
CL136.Contig1_CmRNA	435	70	18.3621	gi|91093929|ref|XP_972503.1|	238	4e-62	PREDICTED: similar to ribosome biogenesis protein TSR1 [Tribolium castaneum]
CL1360.Contig1_CmRNA	822	7	0.9717	gi|149698064|ref|XP_001498242.1|	151	3e-35	PREDICTED: cathepsin B [Equus caballus]
CL1360.Contig2_CmRNA	822	25	3.4704	gi|149698064|ref|XP_001498242.1|	151	3e-35	PREDICTED: cathepsin B [Equus caballus]
CL1361.Contig1_CmRNA	291	26	10.1952	gi|114050773|ref|NP_001040155.1|	142	6e-33	short-chain dehydrogenease/reductase-like [Bombyx mori] >gi|87248227|gb|ABD36166.1| short-chain dehydrogenease/reductase 2 [Bombyx mori]
CL1361.Contig2_CmRNA	349	36	11.7704	gi|114050773|ref|NP_001040155.1|	164	1e-39	short-chain dehydrogenease/reductase-like [Bombyx mori] >gi|87248227|gb|ABD36166.1| short-chain dehydrogenease/reductase 2 [Bombyx mori]
CL1363.Contig1_CmRNA	1065	0	0	gi|332025612|gb|EGI65774.1|	353	1e-108	Epsin-2 [Acromyrmex echinatior]
CL1363.Contig2_CmRNA	1043	0	0	gi|332025612|gb|EGI65774.1|	409	1e-112	Epsin-2 [Acromyrmex echinatior]
CL1363.Contig3_CmRNA	1032	10	1.1057	gi|332025612|gb|EGI65774.1|	361	1e-110	Epsin-2 [Acromyrmex echinatior]
CL1363.Contig4_CmRNA	1010	0	0	gi|332025612|gb|EGI65774.1|	417	1e-115	Epsin-2 [Acromyrmex echinatior]
CL1367.Contig1_CmRNA	1158	9	0.8868	gi|307179497|gb|EFN67811.1|	590	1e-167	Broad-complex core protein isoforms 1/2/3/4/5 [Camponotus floridanus]
CL1367.Contig2_CmRNA	1155	12	1.1855	gi|94400903|ref|NP_001035356.1|	604	1e-171	broad-complex [Apis mellifera] >gi|84579537|dbj|BAE72137.1| broad-complex [Apis mellifera]
CL1369.Contig1_CmRNA	1248	0	0	gi|195473058|ref|XP_002088813.1|	129	3e-28	GE18771 [Drosophila yakuba] >gi|194174914|gb|EDW88525.1| GE18771 [Drosophila yakuba]
CL1369.Contig2_CmRNA	1223	19	1.7727	gi|195115256|ref|XP_002002180.1|	129	2e-28	GI13970 [Drosophila mojavensis] >gi|193912755|gb|EDW11622.1| GI13970 [Drosophila mojavensis]
CL1369.Contig3_CmRNA	605	5	0.943	gi|115681537|ref|XP_001201559.1|	69.3	1e-10	PREDICTED: similar to 5-amp-activated protein kinase, beta subunit [Strongylocentrotus purpuratus] >gi|115931397|ref|XP_001183812.1| PREDICTED: similar to 5-amp-activated protein kinase, beta subunit [Strongylocentrotus purpuratus]
CL1369.Contig4_CmRNA	580	0	0	gi|296475230|gb|DAA17345.1|	62.8	9e-09	fibrous sheath CABYR-binding protein [Bos taurus]
CL137.Contig2_CmRNA	365	86	26.8856	gi|157106438|ref|XP_001649322.1|	52	8e-06	proacrosin, putative [Aedes aegypti] >gi|108879842|gb|EAT44067.1| proacrosin, putative [Aedes aegypti]
CL1370.Contig1_CmRNA	295	35	13.5382	gi|332016774|gb|EGI57595.1|	129	4e-29	Eukaryotic translation initiation factor 3 subunit C [Acromyrmex echinatior]
CL1371.Contig1_CmRNA	301	8	3.0328	gi|345490843|ref|XP_003426476.1|	148	8e-35	PREDICTED: serine/threonine-protein kinase tousled-like 2-like isoform 4 [Nasonia vitripennis]
CL1371.Contig2_CmRNA	215	3	1.5922	gi|345490843|ref|XP_003426476.1|	71.6	1e-14	PREDICTED: serine/threonine-protein kinase tousled-like 2-like isoform 4 [Nasonia vitripennis]
CL1374.Contig1_CmRNA	1805	6897	436.01	gi|7862150|gb|AAF70499.1|AF255341_1	258	5e-67	3-dehydroecdysone 3alpha-reductase [Spodoptera littoralis]
CL1376.Contig1_CmRNA	802	9	1.2805	gi|158289959|ref|XP_559074.3|	257	4e-67	AGAP010382-PA [Anopheles gambiae str. PEST] >gi|259511487|sp|Q5TUF1.3|SRRT_ANOGA RecName: Full=Serrate RNA effector molecule homolog; AltName: Full=Arsenite-resistance protein 2 homolog >gi|157018409|gb|EAL41034.3| AGAP010382-PA [Anopheles gambiae str. PEST]
CL1376.Contig2_CmRNA	746	0	0	gi|158289959|ref|XP_559074.3|	196	1e-48	AGAP010382-PA [Anopheles gambiae str. PEST] >gi|259511487|sp|Q5TUF1.3|SRRT_ANOGA RecName: Full=Serrate RNA effector molecule homolog; AltName: Full=Arsenite-resistance protein 2 homolog >gi|157018409|gb|EAL41034.3| AGAP010382-PA [Anopheles gambiae str. PEST]
CL1376.Contig3_CmRNA	596	2	0.3829	gi|158289959|ref|XP_559074.3|	202	1e-50	AGAP010382-PA [Anopheles gambiae str. PEST] >gi|259511487|sp|Q5TUF1.3|SRRT_ANOGA RecName: Full=Serrate RNA effector molecule homolog; AltName: Full=Arsenite-resistance protein 2 homolog >gi|157018409|gb|EAL41034.3| AGAP010382-PA [Anopheles gambiae str. PEST]
CL1376.Contig4_CmRNA	540	0	0	gi|158289959|ref|XP_559074.3|	140	3e-32	AGAP010382-PA [Anopheles gambiae str. PEST] >gi|259511487|sp|Q5TUF1.3|SRRT_ANOGA RecName: Full=Serrate RNA effector molecule homolog; AltName: Full=Arsenite-resistance protein 2 homolog >gi|157018409|gb|EAL41034.3| AGAP010382-PA [Anopheles gambiae str. PEST]
CL1377.Contig1_CmRNA	1562	2057	150.268	gi|51039033|gb|AAT94286.1|	228	5e-58	lysozyme II [Pieris rapae]
CL1377.Contig2_CmRNA	685	21	3.4982	gi|51039033|gb|AAT94286.1|	228	1e-58	lysozyme II [Pieris rapae]
CL1379.Contig1_CmRNA	758	96	14.4516	gi|156551734|ref|XP_001599719.1|	338	1e-91	PREDICTED: polymerase delta-interacting protein 2-like [Nasonia vitripennis]
CL1379.Contig2_CmRNA	470	1	0.2428	gi|156551734|ref|XP_001599719.1|	153	2e-36	PREDICTED: polymerase delta-interacting protein 2-like [Nasonia vitripennis]
CL138.Contig1_CmRNA	487	80	18.7445	gi|18700461|dbj|BAB85198.1|	186	4e-46	Titin-like protein [Bombyx mori]
CL138.Contig2_CmRNA	487	56	13.1212	gi|18700461|dbj|BAB85198.1|	187	1e-46	Titin-like protein [Bombyx mori]
CL1387.Contig1_CmRNA	2453	11871	552.209	gi|304368175|gb|ADM26737.1|	1401	0	heat shock protein 90 [Ostrinia furnacalis]
CL1387.Contig2_CmRNA	1117	1257	128.409	gi|157419936|gb|ABV55506.1|	706	0	heat shock protein 90 [Microplitis mediator]
CL1387.Contig3_CmRNA	285	31	12.4117	gi|157419936|gb|ABV55506.1|	181	7e-45	heat shock protein 90 [Microplitis mediator]
CL1387.Contig4_CmRNA	1147	1116	111.023	gi|157419936|gb|ABV55506.1|	687	0	heat shock protein 90 [Microplitis mediator]
CL1389.Contig1_CmRNA	1018	21	2.3539	gi|284813581|ref|NP_001165396.1|	311	3e-83	C-type lectin 19 [Bombyx mori] >gi|283139164|gb|ADB12587.1| C-type lectin 10 [Bombyx mori]
CL1389.Contig2_CmRNA	994	27	3.0995	gi|284813581|ref|NP_001165396.1|	311	3e-83	C-type lectin 19 [Bombyx mori] >gi|283139164|gb|ADB12587.1| C-type lectin 10 [Bombyx mori]
CL139.Contig1_CmRNA	1069	149	15.9046	gi|340725834|ref|XP_003401270.1|	124	6e-27	PREDICTED: glycerol-3-phosphate acyltransferase 1, mitochondrial-like isoform 2 [Bombus terrestris]
CL1391.Contig1_CmRNA	1444	133	10.5099	gi|194863403|ref|XP_001970423.1|	119	5e-25	GG23381 [Drosophila erecta] >gi|190662290|gb|EDV59482.1| GG23381 [Drosophila erecta]
CL1395.Contig1_CmRNA	2369	1892	91.1317	gi|323505969|gb|ADX87348.1|	691	0	yellow-c [Heliconius melpomene]
CL1399.Contig1_CmRNA	1635	0	0	gi|156073243|gb|ABU45982.1|	690	0	G(alpha)q [Helicoverpa assulta]
CL1399.Contig2_CmRNA	1635	0	0	gi|156073243|gb|ABU45982.1|	662	0	G(alpha)q [Helicoverpa assulta]
CL1399.Contig3_CmRNA	1496	2	0.1525	gi|201023279|ref|NP_001128385.1|	659	0	G protein alpha q isoform 2 [Bombyx mori] >gi|197245032|dbj|BAG69141.1| G protein alpha q isoform 2 [Bombyx mori]
CL1399.Contig4_CmRNA	1496	1	0.0763	gi|201023279|ref|NP_001128385.1|	687	0	G protein alpha q isoform 2 [Bombyx mori] >gi|197245032|dbj|BAG69141.1| G protein alpha q isoform 2 [Bombyx mori]
CL1399.Contig5_CmRNA	1445	0	0	gi|156073243|gb|ABU45982.1|	690	0	G(alpha)q [Helicoverpa assulta]
CL1399.Contig6_CmRNA	1445	0	0	gi|156073243|gb|ABU45982.1|	662	0	G(alpha)q [Helicoverpa assulta]
CL1399.Contig7_CmRNA	1306	5	0.4369	gi|201023279|ref|NP_001128385.1|	659	0	G protein alpha q isoform 2 [Bombyx mori] >gi|197245032|dbj|BAG69141.1| G protein alpha q isoform 2 [Bombyx mori]
CL1399.Contig8_CmRNA	1306	0	0	gi|201023279|ref|NP_001128385.1|	687	0	G protein alpha q isoform 2 [Bombyx mori] >gi|197245032|dbj|BAG69141.1| G protein alpha q isoform 2 [Bombyx mori]
CL140.Contig1_CmRNA	376	23	6.98	gi|194749683|ref|XP_001957268.1|	171	1e-41	GF25319, isoform A [Drosophila ananassae] >gi|190624550|gb|EDV40074.1| GF25319, isoform A [Drosophila ananassae]
CL1400.Contig1_CmRNA	803	11	1.5631	gi|307175901|gb|EFN65714.1|	405	1e-111	UPF0326 protein FAM152B [Camponotus floridanus]
CL1400.Contig2_CmRNA	489	1	0.2333	gi|332020705|gb|EGI61110.1|	202	3e-51	PPPDE peptidase domain-containing protein 2 [Acromyrmex echinatior]
CL1400.Contig3_CmRNA	408	2	0.5593	gi|307175901|gb|EFN65714.1|	211	8e-54	UPF0326 protein FAM152B [Camponotus floridanus]
CL1400.Contig4_CmRNA	319	6	2.1462	gi|307175901|gb|EFN65714.1|	138	6e-32	UPF0326 protein FAM152B [Camponotus floridanus]
CL1403.Contig1_CmRNA	1114	106	10.8576	gi|195164504|ref|XP_002023087.1|	134	4e-55	GL21148 [Drosophila persimilis] >gi|194105172|gb|EDW27215.1| GL21148 [Drosophila persimilis]
CL1403.Contig2_CmRNA	946	99	11.9415	gi|118788823|ref|XP_317011.3|	115	2e-24	AGAP008432-PA [Anopheles gambiae str. PEST] >gi|116122930|gb|EAA12719.3| AGAP008432-PA [Anopheles gambiae str. PEST]
CL1405.Contig1_CmRNA	2459	129	5.9861	gi|340717180|ref|XP_003397065.1|	561	1e-158	PREDICTED: peroxidase-like isoform 2 [Bombus terrestris]
CL1405.Contig2_CmRNA	2230	68	3.4795	gi|340717180|ref|XP_003397065.1|	561	1e-158	PREDICTED: peroxidase-like isoform 2 [Bombus terrestris]
CL1406.Contig1_CmRNA	1154	31	3.0653	gi|340709880|ref|XP_003393528.1|	478	1e-133	PREDICTED: KH domain-containing, RNA-binding, signal transduction-associated protein 2-like [Bombus terrestris]
CL1406.Contig2_CmRNA	1139	91	9.1166	gi|340709880|ref|XP_003393528.1|	482	1e-134	PREDICTED: KH domain-containing, RNA-binding, signal transduction-associated protein 2-like [Bombus terrestris]
CL1410.Contig1_CmRNA	654	55	9.5962	gi|189236433|ref|XP_972706.2|	105	2e-21	PREDICTED: similar to nuclear transcription factor Y, alpha like [Tribolium castaneum]
CL1410.Contig2_CmRNA	633	25	4.5066	gi|189236433|ref|XP_972706.2|	105	2e-21	PREDICTED: similar to nuclear transcription factor Y, alpha like [Tribolium castaneum]
CL1412.Contig1_CmRNA	1626	4395	308.427	gi|157105561|ref|XP_001648922.1|	565	1e-159	pyruvate dehydrogenase [Aedes aegypti] >gi|108880044|gb|EAT44269.1| pyruvate dehydrogenase [Aedes aegypti]
CL1416.Contig1_CmRNA	1214	457	42.9547	gi|327286641|ref|XP_003228038.1|	133	2e-29	PREDICTED: protein artemis-like [Anolis carolinensis]
CL1419.Contig1_CmRNA	2230	2014	103.055	gi|123431636|ref|XP_001308251.1|	289	4e-76	flocculin [Trichomonas vaginalis G3]
CL142.Contig1_CmRNA	692	99	16.3246	gi|328712197|ref|XP_001944912.2|	115	2e-24	PREDICTED: collagen alpha-2(IV) chain-like [Acyrthosiphon pisum]
CL1420.Contig1_CmRNA	786	225	32.6643	gi|256772701|emb|CBB07053.1|	184	3e-45	CYP6AE30 protein [Cnaphalocrocis medinalis]
CL1420.Contig2_CmRNA	424	29	7.8045	gi|256772701|emb|CBB07053.1|	193	2e-48	CYP6AE30 protein [Cnaphalocrocis medinalis]
CL1422.Contig1_CmRNA	609	10	1.8737	gi|157126801|ref|XP_001660953.1|	228	2e-58	down syndrome cell adhesion molecule [Aedes aegypti] >gi|108873163|gb|EAT37388.1| down syndrome cell adhesion molecule [Aedes aegypti]
CL1422.Contig2_CmRNA	536	9	1.916	gi|170039599|ref|XP_001847617.1|	246	3e-64	down syndrome cell adhesion molecule [Culex quinquefasciatus] >gi|167863135|gb|EDS26518.1| down syndrome cell adhesion molecule [Culex quinquefasciatus]
CL1423.Contig1_CmRNA	1170	16	1.5604	gi|329755387|gb|AEC03972.1|	111	8e-23	nacrein B4 [Pinctada margaritifera]
CL1423.Contig2_CmRNA	1143	19	1.8968	gi|74852044|sp|Q54GV8.1|Y8625_DICDI	119	2e-25	RecName: Full=Uncharacterized transmembrane protein DDB_G0289901; Flags: Precursor
CL1424.Contig1_CmRNA	478	4	0.9549	gi|91076878|ref|XP_974995.1|	70.9	2e-11	PREDICTED: similar to mitochondrial methionyl-tRNA formyltransferase [Tribolium castaneum]
CL1424.Contig2_CmRNA	452	4	1.0098	gi|91076878|ref|XP_974995.1|	122	4e-27	PREDICTED: similar to mitochondrial methionyl-tRNA formyltransferase [Tribolium castaneum]
CL1427.Contig1_CmRNA	447	6	1.5316	gi|283945476|ref|NP_001164650.1|	105	5e-22	scavenger receptor class B member 3 [Bombyx mori] >gi|283483654|dbj|BAI66271.1| Cameo1 [Bombyx mori]
CL1427.Contig2_CmRNA	398	3	0.8601	gi|283945476|ref|NP_001164650.1|	105	5e-22	scavenger receptor class B member 3 [Bombyx mori] >gi|283483654|dbj|BAI66271.1| Cameo1 [Bombyx mori]
CL143.Contig1_CmRNA	909	47	5.8999	gi|158295691|ref|XP_316357.4|	335	2e-90	AGAP006340-PA [Anopheles gambiae str. PEST] >gi|157016158|gb|EAA44201.4| AGAP006340-PA [Anopheles gambiae str. PEST]
CL143.Contig2_CmRNA	825	25	3.4578	gi|45552895|ref|NP_995974.1|	325	1e-87	misshapen, isoform B [Drosophila melanogaster] >gi|45445759|gb|AAS64942.1| misshapen, isoform B [Drosophila melanogaster]
CL1431.Contig1_CmRNA	1091	146	15.2701	gi|189238375|ref|XP_969851.2|	250	7e-65	PREDICTED: similar to acetyl-coa carboxylase [Tribolium castaneum]
CL1431.Contig2_CmRNA	1136	64	6.4286	gi|189238375|ref|XP_969851.2|	244	4e-63	PREDICTED: similar to acetyl-coa carboxylase [Tribolium castaneum]
CL1434.Contig1_CmRNA	494	32	7.3916	gi|164448642|ref|NP_001106734.1|	170	2e-41	chromodomain-helicase-DNA-binding protein 1 [Bombyx mori] >gi|269969346|sp|A9X4T1.1|CHD1_BOMMO RecName: Full=Chromodomain-helicase-DNA-binding protein 1; Short=CHD-1; AltName: Full=ATP-dependent helicase CHD1 >gi|89213694|gb|ABD64154.1| CHD1 [Bombyx mori]
CL1434.Contig2_CmRNA	440	52	13.4854	gi|164448642|ref|NP_001106734.1|	172	5e-42	chromodomain-helicase-DNA-binding protein 1 [Bombyx mori] >gi|269969346|sp|A9X4T1.1|CHD1_BOMMO RecName: Full=Chromodomain-helicase-DNA-binding protein 1; Short=CHD-1; AltName: Full=ATP-dependent helicase CHD1 >gi|89213694|gb|ABD64154.1| CHD1 [Bombyx mori]
CL1436.Contig1_CmRNA	1053	258	27.9579	gi|345493446|ref|XP_001604739.2|	212	3e-53	PREDICTED: traB domain-containing protein-like isoform 1 [Nasonia vitripennis]
CL1436.Contig2_CmRNA	344	10	3.3171	gi|340726746|ref|XP_003401714.1|	79.3	5e-14	PREDICTED: traB domain-containing protein-like [Bombus terrestris]
CL1437.Contig1_CmRNA	325	11	3.8621	gi|1549144|dbj|BAA07467.1|	58.5	8e-08	ORF2 [Bombyx mori]
CL1441.Contig1_CmRNA	1546	420	30.9994	gi|91082587|ref|XP_967423.1|	469	1e-130	PREDICTED: similar to AGAP002425-PA [Tribolium castaneum]
CL1442.Contig1_CmRNA	691	291	48.0539	gi|157107703|ref|XP_001649899.1|	230	4e-59	acireductone dioxygenase [Aedes aegypti] >gi|108879511|gb|EAT43736.1| acireductone dioxygenase [Aedes aegypti]
CL1443.Contig1_CmRNA	2092	2	0.1091	gi|161077598|ref|NP_001096893.1|	207	3e-85	CG34417, isoform D [Drosophila melanogaster] >gi|158031731|gb|ABW09346.1| CG34417, isoform D [Drosophila melanogaster]
CL1443.Contig2_CmRNA	2058	2	0.1109	gi|320541794|ref|NP_001188548.1|	332	6e-89	CG34417, isoform K [Drosophila melanogaster] >gi|318069324|gb|ADV37632.1| CG34417, isoform K [Drosophila melanogaster]
CL1443.Contig3_CmRNA	2044	0	0	gi|194769023|ref|XP_001966607.1|	208	7e-69	GF22264 [Drosophila ananassae] >gi|190617371|gb|EDV32895.1| GF22264 [Drosophila ananassae]
CL1443.Contig4_CmRNA	2010	0	0	gi|194769023|ref|XP_001966607.1|	278	5e-73	GF22264 [Drosophila ananassae] >gi|190617371|gb|EDV32895.1| GF22264 [Drosophila ananassae]
CL1443.Contig5_CmRNA	1919	6	0.3568	gi|333469478|gb|EAA12124.6|	171	1e-40	AGAP000906-PA [Anopheles gambiae str. PEST]
CL1443.Contig6_CmRNA	1871	30	1.8296	gi|333469478|gb|EAA12124.6|	171	1e-40	AGAP000906-PA [Anopheles gambiae str. PEST]
CL1443.Contig7_CmRNA	3305	12	0.4143	gi|333469478|gb|EAA12124.6|	271	2e-70	AGAP000906-PA [Anopheles gambiae str. PEST]
CL1443.Contig8_CmRNA	3166	58	2.0904	gi|333469478|gb|EAA12124.6|	171	2e-40	AGAP000906-PA [Anopheles gambiae str. PEST]
CL1443.Contig9_CmRNA	3357	130	4.4188	gi|333469478|gb|EAA12124.6|	233	3e-66	AGAP000906-PA [Anopheles gambiae str. PEST]
CL1444.Contig1_CmRNA	351	80	26.0074	gi|330802667|ref|XP_003289336.1|	58.2	1e-07	hypothetical protein DICPUDRAFT_153687 [Dictyostelium purpureum] >gi|325080589|gb|EGC34138.1| hypothetical protein DICPUDRAFT_153687 [Dictyostelium purpureum]
CL1445.Contig1_CmRNA	621	9	1.6537	gi|340722673|ref|XP_003399728.1|	91.7	2e-17	PREDICTED: apoptosis regulatory protein Siva-like [Bombus terrestris]
CL1445.Contig2_CmRNA	521	4	0.8761	gi|340722673|ref|XP_003399728.1|	88.6	1e-16	PREDICTED: apoptosis regulatory protein Siva-like [Bombus terrestris]
CL1446.Contig1_CmRNA	1535	41	3.0478	gi|291464020|gb|ADE05548.1|	571	1e-161	truncated carboxylesterase [Helicoverpa armigera]
CL1446.Contig2_CmRNA	1524	102	7.6371	gi|291464020|gb|ADE05548.1|	571	1e-161	truncated carboxylesterase [Helicoverpa armigera]
CL1447.Contig1_CmRNA	631	77	13.9244	gi|194757525|ref|XP_001961015.1|	99.8	8e-20	GF13657 [Drosophila ananassae] >gi|190622313|gb|EDV37837.1| GF13657 [Drosophila ananassae]
CL1447.Contig2_CmRNA	595	65	12.4655	gi|194757525|ref|XP_001961015.1|	92.4	1e-17	GF13657 [Drosophila ananassae] >gi|190622313|gb|EDV37837.1| GF13657 [Drosophila ananassae]
CL1451.Contig1_CmRNA	456	450	112.606	gi|307182795|gb|EFN69911.1|	57	2e-07	hypothetical protein EAG_07209 [Camponotus floridanus]
CL1457.Contig1_CmRNA	1691	201	13.5633	gi|290560655|ref|NP_001166838.1|	706	0	nucleosome assembly protein isoform 1 [Bombyx mori] >gi|95102568|gb|ABF51222.1| nucleosome assembly protein isoform 1 [Bombyx mori]
CL1457.Contig2_CmRNA	1587	152	10.929	gi|114052018|ref|NP_001040201.1|	681	0	nucleosome assembly protein isoform 2 [Bombyx mori] >gi|87248371|gb|ABD36238.1| nucleosome assembly protein [Bombyx mori]
CL1462.Contig1_CmRNA	1969	203	11.7642	gi|189237024|ref|XP_968522.2|	94.7	1e-17	PREDICTED: similar to eukaryotic translation initiation factor 4 gamma, 3 [Tribolium castaneum]
CL1464.Contig1_CmRNA	805	31	4.3942	gi|307173250|gb|EFN64303.1|	313	7e-84	Heterogeneous nuclear ribonucleoprotein Q [Camponotus floridanus]
CL1464.Contig2_CmRNA	799	0	0	gi|189234965|ref|XP_973687.2|	311	2e-83	PREDICTED: similar to CG17838 CG17838-PB [Tribolium castaneum]
CL147.Contig1_CmRNA	1478	1134	87.5492	gi|157110521|ref|XP_001651138.1|	478	1e-133	adenylsulfate kinase [Aedes aegypti] >gi|108878670|gb|EAT42895.1| adenylsulfate kinase [Aedes aegypti]
CL1471.Contig1_CmRNA	326	3	1.0501	gi|296427820|gb|ADH16740.1|	145	4e-34	ABC transporter family C protein ABCC2 [Heliothis virescens]
CL1471.Contig2_CmRNA	294	3	1.1644	gi|296427820|gb|ADH16740.1|	152	6e-36	ABC transporter family C protein ABCC2 [Heliothis virescens]
CL1472.Contig1_CmRNA	485	455	107.049	gi|194749017|ref|XP_001956936.1|	144	1e-33	GF24314 [Drosophila ananassae] >gi|190624218|gb|EDV39742.1| GF24314 [Drosophila ananassae]
CL1483.Contig1_CmRNA	336	13	4.4149	gi|198460119|ref|XP_002138784.1|	67	2e-10	GA24203 [Drosophila pseudoobscura pseudoobscura] >gi|198136908|gb|EDY69342.1| GA24203 [Drosophila pseudoobscura pseudoobscura]
CL1486.Contig1_CmRNA	372	81	24.846	gi|260798418|ref|XP_002594197.1|	52.8	5e-06	hypothetical protein BRAFLDRAFT_201170 [Branchiostoma floridae] >gi|229279430|gb|EEN50208.1| hypothetical protein BRAFLDRAFT_201170 [Branchiostoma floridae]
CL1488.Contig1_CmRNA	355	25	8.0357	gi|91090137|ref|XP_976135.1|	59.7	4e-08	PREDICTED: similar to arrest CG31762-PC isoform 4 [Tribolium castaneum]
CL1488.Contig2_CmRNA	310	13	4.7851	gi|91090137|ref|XP_976135.1|	56.2	4e-07	PREDICTED: similar to arrest CG31762-PC isoform 4 [Tribolium castaneum]
CL1494.Contig1_CmRNA	886	387	49.8415	gi|238481789|gb|ACR43934.1|	208	3e-52	cathepsin L-like cysteine proteinase [Haliotis diversicolor supertexta]
CL1494.Contig2_CmRNA	1036	1216	133.933	gi|238481789|gb|ACR43934.1|	226	1e-57	cathepsin L-like cysteine proteinase [Haliotis diversicolor supertexta]
CL1497.Contig1_CmRNA	557	62	12.7014	gi|156555406|ref|XP_001605538.1|	68.9	1e-10	PREDICTED: similar to RE34508p [Nasonia vitripennis]
CL1497.Contig2_CmRNA	450	8	2.0286	gi|221132307|ref|XP_002161103.1|	70.5	2e-11	PREDICTED: similar to GH18432 [Hydra magnipapillata]
CL1498.Contig1_CmRNA	1523	203	15.2093	gi|189238704|ref|XP_968978.2|	168	7e-40	PREDICTED: similar to Calcium-independent phospholipase A2-gamma (Intracellular membrane-associated calcium-independent phospholipase A2 gamma) (iPLA2-gamma) (Patatin-like phospholipase domain-containing protein 8) (Group VIB calcium-independent phospholipase [Tribolium castaneum]
CL15.Contig1_CmRNA	681	194	32.5064	gi|22004004|dbj|BAC06452.1|	72.4	2e-11	reverse transcrpitase [Papilio xuthus]
CL1503.Contig1_CmRNA	1529	297	22.1647	gi|328790508|ref|XP_624688.3|	510	1e-143	PREDICTED: microspherule protein 1-like [Apis mellifera]
CL1506.Contig1_CmRNA	1044	91	9.9461	gi|345495054|ref|XP_003427425.1|	124	6e-27	PREDICTED: polyadenylate-binding protein-interacting protein 1-like [Nasonia vitripennis]
CL1506.Contig2_CmRNA	828	4	0.5512	gi|345495054|ref|XP_003427425.1|	94.7	4e-18	PREDICTED: polyadenylate-binding protein-interacting protein 1-like [Nasonia vitripennis]
CL1507.Contig1_CmRNA	376	0	0	gi|91076516|ref|XP_973385.1|	73.2	3e-12	PREDICTED: similar to glutamate dehydrogenase [Tribolium castaneum]
CL1507.Contig2_CmRNA	373	0	0	gi|91076516|ref|XP_973385.1|	73.2	3e-12	PREDICTED: similar to glutamate dehydrogenase [Tribolium castaneum]
CL1509.Contig1_CmRNA	1189	2136	204.99	gi|290965440|dbj|BAI82246.1|	70.9	1e-10	merozoite surface protein 1 [Plasmodium inui]
CL151.Contig1_CmRNA	1058	148	15.9621	gi|114052837|ref|NP_001040495.1|	516	1e-145	epimerase family protein SDR39U1 [Bombyx mori] >gi|95103134|gb|ABF51508.1| C14orf124 protein [Bombyx mori]
CL151.Contig2_CmRNA	289	4	1.5793	gi|114052837|ref|NP_001040495.1|	120	2e-26	epimerase family protein SDR39U1 [Bombyx mori] >gi|95103134|gb|ABF51508.1| C14orf124 protein [Bombyx mori]
CL1510.Contig1_CmRNA	814	53	7.4296	gi|284813581|ref|NP_001165396.1|	168	2e-40	C-type lectin 19 [Bombyx mori] >gi|283139164|gb|ADB12587.1| C-type lectin 10 [Bombyx mori]
CL1510.Contig2_CmRNA	812	18	2.5295	gi|284813581|ref|NP_001165396.1|	169	2e-40	C-type lectin 19 [Bombyx mori] >gi|283139164|gb|ADB12587.1| C-type lectin 10 [Bombyx mori]
CL1514.Contig1_CmRNA	718	56	8.8997	gi|112983304|ref|NP_001036961.1|	99.8	1e-19	wing disc-specific protein [Bombyx mori] >gi|17298115|dbj|BAB78526.1| wing disc-specific protein [Bombyx mori]
CL1514.Contig2_CmRNA	682	17	2.8443	gi|112983304|ref|NP_001036961.1|	97.8	3e-19	wing disc-specific protein [Bombyx mori] >gi|17298115|dbj|BAB78526.1| wing disc-specific protein [Bombyx mori]
CL1516.Contig1_CmRNA	1201	162	15.3917	gi|193618024|ref|XP_001950544.1|	719	0	PREDICTED: 116 kDa U5 small nuclear ribonucleoprotein component-like isoform 3 [Acyrthosiphon pisum]
CL1519.Contig1_CmRNA	1139	126	12.6229	gi|158508578|ref|NP_001103478.1|	600	1e-170	cyclin 3 [Bombyx mori] >gi|157695098|gb|ABV66133.1| cyclin 3 [Bombyx mori]
CL1520.Contig1_CmRNA	520	7	1.5361	gi|290462873|gb|ADD24484.1|	103	4e-21	Transposable element Tc3 transposase [Lepeophtheirus salmonis]
CL1520.Contig2_CmRNA	519	9	1.9787	gi|225712314|gb|ACO12003.1|	108	1e-22	Transposable element Tc3 transposase [Lepeophtheirus salmonis]
CL1520.Contig3_CmRNA	508	4	0.8985	gi|290462873|gb|ADD24484.1|	115	1e-24	Transposable element Tc3 transposase [Lepeophtheirus salmonis]
CL1522.Contig1_CmRNA	2709	251	10.5725	gi|300510884|gb|ADK25060.1|	1249	0	NADPH cytochrome P450 reductase [Helicoverpa armigera] >gi|304569603|gb|ADM45306.1| NADPH cytochrome P450 reductase [Helicoverpa armigera]
CL1522.Contig2_CmRNA	2125	29	1.5572	gi|300510884|gb|ADK25060.1|	945	0	NADPH cytochrome P450 reductase [Helicoverpa armigera] >gi|304569603|gb|ADM45306.1| NADPH cytochrome P450 reductase [Helicoverpa armigera]
CL1525.Contig1_CmRNA	298	11	4.212	gi|170068519|ref|XP_001868898.1|	97.1	2e-19	RAD51C protein [Culex quinquefasciatus] >gi|167864512|gb|EDS27895.1| RAD51C protein [Culex quinquefasciatus]
CL1528.Contig1_CmRNA	297	55	21.131	gi|307203440|gb|EFN82515.1|	57	2e-07	Microtubule-associated protein futsch [Harpegnathos saltator]
CL153.Contig1_CmRNA	600	30	5.7054	gi|282165774|ref|NP_001164128.1|	273	5e-72	cardiolipin synthase 1 [Tribolium castaneum]
CL153.Contig2_CmRNA	442	3	0.7745	gi|270011218|gb|EFA07666.1|	92	3e-32	cardiolipin synthase 1 [Tribolium castaneum]
CL1533.Contig1_CmRNA	1003	11	1.2514	gi|189237907|ref|XP_969118.2|	64.7	6e-09	PREDICTED: similar to GA18707-PA [Tribolium castaneum]
CL1533.Contig2_CmRNA	979	7	0.8159	gi|189237907|ref|XP_969118.2|	64.7	6e-09	PREDICTED: similar to GA18707-PA [Tribolium castaneum]
CL1535.Contig1_CmRNA	733	85	13.2321	gi|125980801|ref|XP_001354423.1|	75.1	3e-12	GA13737 [Drosophila pseudoobscura pseudoobscura] >gi|195164371|ref|XP_002023021.1| GL16585 [Drosophila persimilis] >gi|54642731|gb|EAL31476.1| GA13737 [Drosophila pseudoobscura pseudoobscura] >gi|194105083|gb|EDW27126.1| GL16585 [Drosophila persimilis]
CL1536.Contig1_CmRNA	755	33	4.9875	gi|194747353|ref|XP_001956116.1|	216	8e-55	GF25042 [Drosophila ananassae] >gi|190623398|gb|EDV38922.1| GF25042 [Drosophila ananassae]
CL1536.Contig2_CmRNA	735	3	0.4657	gi|54400664|ref|NP_001006081.1|	195	1e-48	DNA replication complex GINS protein PSF1 [Danio rerio] >gi|53733728|gb|AAH83239.1| GINS complex subunit 1 (Psf1 homolog) [Danio rerio]
CL1539.Contig2_CmRNA	256	9	4.0116	gi|195355768|ref|XP_002044360.1|	52.4	6e-06	GM19327 [Drosophila sechellia] >gi|194130674|gb|EDW52717.1| GM19327 [Drosophila sechellia]
CL154.Contig1_CmRNA	823	153	21.2132	gi|189237714|ref|XP_968753.2|	391	1e-107	PREDICTED: similar to Protein Mo25 (dMo25) [Tribolium castaneum]
CL1540.Contig1_CmRNA	723	75	11.8369	gi|326673927|ref|XP_003200032.1|	73.6	8e-12	PREDICTED: histone-lysine N-methyltransferase PRDM9-like [Danio rerio]
CL1549.Contig1_CmRNA	374	631	192.518	gi|299930617|gb|ADJ58524.1|	62	7e-09	seminal fluid protein HACP021 [Heliconius erato] >gi|299930657|gb|ADJ58544.1| seminal fluid protein HACP053 [Heliconius erato]
CL155.Contig1_CmRNA	1091	8	0.8367	gi|169234669|ref|NP_001108456.1|	222	2e-56	cytochrome P450 9G3 [Bombyx mori] >gi|167473193|gb|ABZ81070.1| CYP9G3 [Bombyx mori]
CL155.Contig2_CmRNA	1083	11	1.159	gi|169234669|ref|NP_001108456.1|	222	2e-56	cytochrome P450 9G3 [Bombyx mori] >gi|167473193|gb|ABZ81070.1| CYP9G3 [Bombyx mori]
CL1555.Contig1_CmRNA	621	33	6.0637	gi|340721922|ref|XP_003399362.1|	214	2e-54	PREDICTED: niemann-Pick C1 protein-like [Bombus terrestris]
CL1555.Contig2_CmRNA	552	34	7.0284	gi|340721922|ref|XP_003399362.1|	214	2e-54	PREDICTED: niemann-Pick C1 protein-like [Bombus terrestris]
CL1556.Contig1_CmRNA	1222	329	30.7212	gi|91091726|ref|XP_967236.1|	436	1e-120	PREDICTED: similar to AGAP005420-PA [Tribolium castaneum]
CL1556.Contig2_CmRNA	606	86	16.1935	gi|340729102|ref|XP_003402847.1|	170	3e-41	PREDICTED: UPF0605 protein CG18335-like [Bombus terrestris]
CL156.Contig1_CmRNA	908	139	17.468	gi|91080389|ref|XP_966373.1|	427	1e-118	PREDICTED: similar to type II transmembrane protein, partial [Tribolium castaneum]
CL1560.Contig1_CmRNA	1802	84	5.3191	gi|195448397|ref|XP_002071639.1|	518	1e-145	GK25034 [Drosophila willistoni] >gi|194167724|gb|EDW82625.1| GK25034 [Drosophila willistoni]
CL1560.Contig2_CmRNA	1781	13	0.8329	gi|195448397|ref|XP_002071639.1|	518	1e-145	GK25034 [Drosophila willistoni] >gi|194167724|gb|EDW82625.1| GK25034 [Drosophila willistoni]
CL1568.Contig1_CmRNA	647	36	6.3491	gi|156550075|ref|XP_001605452.1|	142	1e-32	PREDICTED: venom acid phosphatase Acph-1-like isoform 1 [Nasonia vitripennis] >gi|345488198|ref|XP_003425857.1| PREDICTED: venom acid phosphatase Acph-1-like isoform 2 [Nasonia vitripennis]
CL1568.Contig2_CmRNA	427	6	1.6034	gi|307196540|gb|EFN78070.1|	67.8	1e-10	Testicular acid phosphatase-like protein [Harpegnathos saltator]
CL1569.Contig1_CmRNA	520	4	0.8777	gi|195107088|ref|XP_001998148.1|	124	2e-27	GI23796 [Drosophila mojavensis] >gi|193914742|gb|EDW13609.1| GI23796 [Drosophila mojavensis]
CL1569.Contig2_CmRNA	499	6	1.372	gi|195552480|ref|XP_002076483.1|	99.4	6e-20	GD17742 [Drosophila simulans] >gi|194201736|gb|EDX15312.1| GD17742 [Drosophila simulans]
CL1572.Contig1_CmRNA	1198	8	0.762	gi|158302121|ref|XP_321742.4|	374	1e-102	AGAP001394-PA [Anopheles gambiae str. PEST] >gi|157012799|gb|EAA01106.5| AGAP001394-PA [Anopheles gambiae str. PEST]
CL1572.Contig2_CmRNA	967	10	1.18	gi|158302121|ref|XP_321742.4|	380	1e-104	AGAP001394-PA [Anopheles gambiae str. PEST] >gi|157012799|gb|EAA01106.5| AGAP001394-PA [Anopheles gambiae str. PEST]
CL1572.Contig3_CmRNA	953	5	0.5987	gi|345489459|ref|XP_001606157.2|	288	3e-76	PREDICTED: synaptosomal-associated protein 25 [Nasonia vitripennis]
CL1573.Contig1_CmRNA	388	44	12.94	gi|345511|pir||PC1232	109	3e-23	copia polyprotein - fruit fly (Drosophila simulans) retrotransposon copia (fragments)
CL1577.Contig1_CmRNA	319	20	7.1541	gi|328789998|ref|XP_624756.3|	89	6e-17	PREDICTED: TBC1 domain family member 15 [Apis mellifera]
CL158.Contig1_CmRNA	363	65	20.4324	gi|198436270|ref|XP_002126309.1|	69.7	4e-11	PREDICTED: similar to GE22172 [Ciona intestinalis]
CL1583.Contig1_CmRNA	2052	618	34.3657	gi|306518664|ref|NP_001182393.1|	806	0	carboxyl/cholinesterase 7 [Bombyx mori] >gi|301069200|dbj|BAJ11979.1| carboxyl/cholinesterase 7 [Bombyx mori]
CL1583.Contig2_CmRNA	1131	36	3.6321	gi|306518664|ref|NP_001182393.1|	206	2e-51	carboxyl/cholinesterase 7 [Bombyx mori] >gi|301069200|dbj|BAJ11979.1| carboxyl/cholinesterase 7 [Bombyx mori]
CL1590.Contig1_CmRNA	4712	1436	34.7747	gi|114053127|ref|NP_001040337.1|	537	1e-150	aspartate aminotransferase [Bombyx mori] >gi|95102552|gb|ABF51214.1| aspartate aminotransferase [Bombyx mori]
CL1590.Contig2_CmRNA	1259	237	21.4801	gi|114053127|ref|NP_001040337.1|	537	1e-151	aspartate aminotransferase [Bombyx mori] >gi|95102552|gb|ABF51214.1| aspartate aminotransferase [Bombyx mori]
CL1591.Contig1_CmRNA	628	38	6.9046	gi|170057167|ref|XP_001864363.1|	62	2e-08	papillote protein [Culex quinquefasciatus] >gi|167876685|gb|EDS40068.1| papillote protein [Culex quinquefasciatus]
CL1591.Contig2_CmRNA	530	42	9.0425	gi|170057167|ref|XP_001864363.1|	62	1e-08	papillote protein [Culex quinquefasciatus] >gi|167876685|gb|EDS40068.1| papillote protein [Culex quinquefasciatus]
CL1594.Contig1_CmRNA	737	236	36.5391	gi|170063403|ref|XP_001867090.1|	168	2e-40	neuronal calcium sensor [Culex quinquefasciatus] >gi|167881034|gb|EDS44417.1| neuronal calcium sensor [Culex quinquefasciatus]
CL1595.Contig1_CmRNA	1016	345	38.7471	gi|114050833|ref|NP_001040158.1|	256	1e-66	transketolase [Bombyx mori] >gi|87248239|gb|ABD36172.1| transketolase [Bombyx mori]
CL1596.Contig1_CmRNA	420	78	21.1914	gi|117935415|gb|ABK57040.1|	103	3e-21	hypothetical protein GIP_L1_00540 [Glyptapanteles indiensis]
CL1598.Contig1_CmRNA	587	179	34.7959	gi|158292894|ref|XP_314175.4|	111	2e-23	AGAP005257-PA [Anopheles gambiae str. PEST] >gi|157017206|gb|EAA09578.4| AGAP005257-PA [Anopheles gambiae str. PEST]
CL1598.Contig2_CmRNA	488	37	8.6516	gi|158292894|ref|XP_314175.4|	124	1e-27	AGAP005257-PA [Anopheles gambiae str. PEST] >gi|157017206|gb|EAA09578.4| AGAP005257-PA [Anopheles gambiae str. PEST]
CL16.Contig1_CmRNA	1369	191	15.92	gi|340709396|ref|XP_003393296.1|	716	0	PREDICTED: eukaryotic translation initiation factor 3 subunit E-like [Bombus terrestris]
CL16.Contig2_CmRNA	313	14	5.1038	gi|307213129|gb|EFN88651.1|	209	4e-53	Probable eukaryotic translation initiation factor 3 subunit E [Harpegnathos saltator]
CL1601.Contig1_CmRNA	270	11	4.6488	gi|73544890|gb|AAZ78212.1|	137	1e-31	trypsin [Blattella germanica]
CL1604.Contig1_CmRNA	739	39	6.0219	gi|307184407|gb|EFN70816.1|	455	1e-126	Actin-like protein 87C [Camponotus floridanus]
CL1604.Contig2_CmRNA	279	17	6.9528	gi|114053021|ref|NP_001040336.1|	190	2e-47	ARP1 actin-related protein 1-like protein A [Bombyx mori] >gi|95102550|gb|ABF51213.1| ARP1 actin-related protein 1-like protein A [Bombyx mori]
CL1605.Contig1_CmRNA	252	69	31.2437	gi|298204327|gb|ADI61812.1|	78.2	1e-13	endonuclease-reverse transcriptase [Bombyx mori]
CL1608.Contig1_CmRNA	492	55	12.7559	gi|298503944|gb|ADI86224.1|	79.7	4e-14	gliding associated protein 70 [Toxoplasma gondii]
CL1612.Contig1_CmRNA	1012	16	1.8041	gi|91080937|ref|XP_974247.1|	255	3e-66	PREDICTED: similar to CG16786 CG16786-PA [Tribolium castaneum]
CL1612.Contig2_CmRNA	955	28	3.3456	gi|91080937|ref|XP_974247.1|	262	2e-68	PREDICTED: similar to CG16786 CG16786-PA [Tribolium castaneum]
CL1615.Contig1_CmRNA	795	5	0.7177	gi|112983436|ref|NP_001037638.1|	265	2e-69	RNA binding motif protein X-linked 2 [Bombyx mori] >gi|109706821|gb|ABG42997.1| RNA binding motif protein X-linked 2 [Bombyx mori]
CL1615.Contig2_CmRNA	736	16	2.4806	gi|112983436|ref|NP_001037638.1|	267	4e-70	RNA binding motif protein X-linked 2 [Bombyx mori] >gi|109706821|gb|ABG42997.1| RNA binding motif protein X-linked 2 [Bombyx mori]
CL1622.Contig1_CmRNA	970	6	0.7058	gi|224177574|ref|NP_001128676.2|	229	2e-58	cuticular protein glycine-rich 21 [Bombyx mori] >gi|224038239|gb|ACH78251.2| epidermal protein [Bombyx mori]
CL1622.Contig2_CmRNA	952	8	0.9589	gi|224177574|ref|NP_001128676.2|	223	1e-56	cuticular protein glycine-rich 21 [Bombyx mori] >gi|224038239|gb|ACH78251.2| epidermal protein [Bombyx mori]
CL1622.Contig3_CmRNA	934	15	1.8326	gi|224177574|ref|NP_001128676.2|	217	7e-55	cuticular protein glycine-rich 21 [Bombyx mori] >gi|224038239|gb|ACH78251.2| epidermal protein [Bombyx mori]
CL1627.Contig1_CmRNA	1732	10	0.6588	gi|112983356|ref|NP_001037624.1|	726	0	membrane protein TMS1 [Bombyx mori] >gi|108743531|dbj|BAE95628.1| membrane protein TMS1 [Bombyx mori]
CL1627.Contig2_CmRNA	1705	77	5.1532	gi|112983356|ref|NP_001037624.1|	704	0	membrane protein TMS1 [Bombyx mori] >gi|108743531|dbj|BAE95628.1| membrane protein TMS1 [Bombyx mori]
CL1627.Contig3_CmRNA	582	2	0.3921	gi|112983356|ref|NP_001037624.1|	182	8e-45	membrane protein TMS1 [Bombyx mori] >gi|108743531|dbj|BAE95628.1| membrane protein TMS1 [Bombyx mori]
CL1629.Contig1_CmRNA	305	11	4.1153	gi|195128081|ref|XP_002008494.1|	70.9	2e-11	GI11789 [Drosophila mojavensis] >gi|193920103|gb|EDW18970.1| GI11789 [Drosophila mojavensis]
CL1632.Contig1_CmRNA	367	358	111.309	gi|110347849|gb|ABG72726.1|	54.3	2e-06	protease inhibitor-like protein [Antheraea mylitta]
CL1636.Contig1_CmRNA	2497	586	26.7789	gi|262530080|gb|ACY69181.1|	959	0	UDP-glucose pyrophosphorylase [Spodoptera exigua]
CL1636.Contig2_CmRNA	1770	73	4.7061	gi|262530080|gb|ACY69181.1|	959	0	UDP-glucose pyrophosphorylase [Spodoptera exigua]
CL1638.Contig2_CmRNA	690	522	86.3247	gi|307202580|gb|EFN81915.1|	55.5	2e-06	hypothetical protein EAI_14096 [Harpegnathos saltator]
CL1638.Contig3_CmRNA	866	1672	220.309	gi|195014688|ref|XP_001984061.1|	57.4	8e-07	GH16230 [Drosophila grimshawi] >gi|193897543|gb|EDV96409.1| GH16230 [Drosophila grimshawi]
CL164.Contig1_CmRNA	1754	447	29.0798	gi|87248233|gb|ABD36169.1|	328	7e-88	tetraspanin D [Bombyx mori]
CL164.Contig2_CmRNA	1787	111	7.0878	gi|114050851|ref|NP_001040157.1|	331	6e-89	tetraspanin E [Bombyx mori] >gi|87248235|gb|ABD36170.1| tetraspanin E [Bombyx mori]
CL1640.Contig1_CmRNA	2459	159	7.3782	gi|149502465|ref|XP_001508728.1|	63.5	5e-08	PREDICTED: major centromere autoantigen B-like [Ornithorhynchus anatinus]
CL1640.Contig2_CmRNA	2181	15	0.7848	gi|149502465|ref|XP_001508728.1|	63.5	4e-08	PREDICTED: major centromere autoantigen B-like [Ornithorhynchus anatinus]
CL1640.Contig3_CmRNA	1372	111	9.2317	gi|149502465|ref|XP_001508728.1|	59.3	4e-07	PREDICTED: major centromere autoantigen B-like [Ornithorhynchus anatinus]
CL1640.Contig4_CmRNA	1094	12	1.2516	gi|149502465|ref|XP_001508728.1|	59.3	3e-07	PREDICTED: major centromere autoantigen B-like [Ornithorhynchus anatinus]
CL1643.Contig1_CmRNA	1895	1129	67.9827	gi|225542818|gb|ACN91292.1|	93.6	3e-17	dentin sialophosphoprotein precursor [Ornithorhynchus anatinus]
CL1649.Contig1_CmRNA	1981	35	2.016	gi|195122112|ref|XP_002005556.1|	541	1e-152	GI20531 [Drosophila mojavensis] >gi|193910624|gb|EDW09491.1| GI20531 [Drosophila mojavensis]
CL1649.Contig2_CmRNA	1853	59	3.6332	gi|195026310|ref|XP_001986228.1|	534	1e-150	GH21244 [Drosophila grimshawi] >gi|193902228|gb|EDW01095.1| GH21244 [Drosophila grimshawi]
CL1652.Contig1_CmRNA	303	8	3.0127	gi|198041638|ref|NP_001128236.1|	89	6e-17	ORAI calcium release-activated calcium modulator 1 isoform A [Bombyx mori] >gi|197245030|dbj|BAG69140.1| Orai1 alternative splice form A [Bombyx mori]
CL1656.Contig1_CmRNA	388	62	18.2336	gi|170595123|ref|XP_001902255.1|	82	7e-15	U88 [Brugia malayi]
CL1657.Contig1_CmRNA	269	8	3.3935	gi|340721333|ref|XP_003399077.1|	140	2e-32	PREDICTED: hypothetical protein LOC100644856 [Bombus terrestris]
CL1657.Contig2_CmRNA	222	1	0.514	gi|340721333|ref|XP_003399077.1|	89	6e-17	PREDICTED: hypothetical protein LOC100644856 [Bombus terrestris]
CL1659.Contig1_CmRNA	373	20	6.1184	gi|329669050|gb|AEB96413.1|	54.7	1e-06	hypothetical secreted mucin [Simulium guianense]
CL1661.Contig1_CmRNA	821	69	9.59	gi|189238821|ref|XP_968538.2|	263	9e-69	PREDICTED: similar to heterogeneous nuclear ribonucleoprotein k [Tribolium castaneum]
CL1661.Contig2_CmRNA	786	21	3.0487	gi|189238821|ref|XP_968538.2|	263	8e-69	PREDICTED: similar to heterogeneous nuclear ribonucleoprotein k [Tribolium castaneum]
CL1663.Contig1_CmRNA	377	41	12.4096	gi|189235894|ref|XP_967579.2|	205	4e-52	PREDICTED: similar to AGAP006254-PA [Tribolium castaneum]
CL1665.Contig1_CmRNA	606	16	3.0127	gi|157130020|ref|XP_001655520.1|	189	7e-47	glycine cleavage system h protein [Aedes aegypti] >gi|108884403|gb|EAT48628.1| glycine cleavage system h protein [Aedes aegypti]
CL1665.Contig2_CmRNA	564	6	1.2139	gi|157130020|ref|XP_001655520.1|	189	6e-47	glycine cleavage system h protein [Aedes aegypti] >gi|108884403|gb|EAT48628.1| glycine cleavage system h protein [Aedes aegypti]
CL1667.Contig1_CmRNA	941	10	1.2126	gi|62082409|gb|AAX62032.1|	328	2e-88	trypsin-like serine protease [Ostrinia nubilalis]
CL1667.Contig2_CmRNA	883	2	0.2585	gi|62082409|gb|AAX62032.1|	327	4e-88	trypsin-like serine protease [Ostrinia nubilalis]
CL1667.Contig3_CmRNA	824	136	18.8333	gi|62082409|gb|AAX62032.1|	325	2e-87	trypsin-like serine protease [Ostrinia nubilalis]
CL1668.Contig1_CmRNA	1803	18	1.1392	gi|340725916|ref|XP_003401310.1|	906	0	PREDICTED: cytosolic purine 5'-nucleotidase-like isoform 2 [Bombus terrestris]
CL1668.Contig2_CmRNA	1965	74	4.2972	gi|340725916|ref|XP_003401310.1|	914	0	PREDICTED: cytosolic purine 5'-nucleotidase-like isoform 2 [Bombus terrestris]
CL167.Contig1_CmRNA	1720	260	17.2488	gi|194892525|ref|XP_001977678.1|	717	0	GG19169 [Drosophila erecta] >gi|190649327|gb|EDV46605.1| GG19169 [Drosophila erecta]
CL1670.Contig1_CmRNA	1240	35	3.2208	gi|307175778|gb|EFN65613.1|	514	1e-144	Putative cysteine proteinase CG12163 [Camponotus floridanus]
CL1670.Contig2_CmRNA	1100	7	0.7261	gi|307175778|gb|EFN65613.1|	436	1e-121	Putative cysteine proteinase CG12163 [Camponotus floridanus]
CL1672.Contig1_CmRNA	682	1047	175.177	gi|114052775|ref|NP_001040275.1|	249	9e-65	ring box protein [Bombyx mori] >gi|87248591|gb|ABD36348.1| ring box protein [Bombyx mori]
CL1672.Contig2_CmRNA	418	43	11.7383	gi|114052775|ref|NP_001040275.1|	237	1e-61	ring box protein [Bombyx mori] >gi|87248591|gb|ABD36348.1| ring box protein [Bombyx mori]
CL1675.Contig1_CmRNA	419	8	2.1787	gi|301070146|gb|ADK55519.1|	101	1e-20	small heat shock protein [Spodoptera litura]
CL1675.Contig2_CmRNA	336	4	1.3584	gi|301070146|gb|ADK55519.1|	101	1e-20	small heat shock protein [Spodoptera litura]
CL1676.Contig1_CmRNA	465	13	3.1901	gi|1078989|pir||S53811	164	1e-39	BmGATA beta isoform 2 - silkworm (fragment) >gi|603165|gb|AAA67885.1| BmGATA beta isoform 2 [Bombyx mori]
CL1676.Contig2_CmRNA	463	29	7.1471	gi|603162|gb|AAC13781.1|	134	9e-31	BmGATA beta isoform 3 [Bombyx mori]
CL1680.Contig1_CmRNA	775	82	12.0733	gi|307193108|gb|EFN76025.1|	356	7e-97	Niemann-Pick C1 protein [Harpegnathos saltator]
CL1680.Contig2_CmRNA	385	24	7.1132	gi|307193108|gb|EFN76025.1|	161	9e-39	Niemann-Pick C1 protein [Harpegnathos saltator]
CL1681.Contig1_CmRNA	978	323888	37789.4	gi|195167092|ref|XP_002024368.1|	84.7	6e-15	GL14840 [Drosophila persimilis] >gi|194107741|gb|EDW29784.1| GL14840 [Drosophila persimilis]
CL1682.Contig1_CmRNA	1005	92	10.4456	gi|114052122|ref|NP_001040215.1|	488	1e-136	stathmin [Bombyx mori] >gi|87248413|gb|ABD36259.1| stathmin [Bombyx mori]
CL1682.Contig2_CmRNA	864	7	0.9245	gi|114052122|ref|NP_001040215.1|	403	1e-111	stathmin [Bombyx mori] >gi|87248413|gb|ABD36259.1| stathmin [Bombyx mori]
CL1685.Contig1_CmRNA	1335	1616	138.125	gi|295315536|gb|ADF97836.1|	168	6e-40	Kazal-type inhibitor [Panstrongylus megistus]
CL1689.Contig1_CmRNA	597	43	8.2188	gi|307196554|gb|EFN78084.1|	198	1e-49	Ankyrin-2 [Harpegnathos saltator]
CL1689.Contig2_CmRNA	493	10	2.3146	gi|307196554|gb|EFN78084.1|	220	2e-56	Ankyrin-2 [Harpegnathos saltator]
CL1692.Contig1_CmRNA	831	92	12.6328	gi|333467144|gb|EAA06210.4|	157	5e-37	AGAP000295-PA [Anopheles gambiae str. PEST]
CL1694.Contig1_CmRNA	292	8	3.1262	gi|307181046|gb|EFN68820.1|	67.8	1e-10	Liprin-beta-1 [Camponotus floridanus]
CL1694.Contig2_CmRNA	272	11	4.6146	gi|307181046|gb|EFN68820.1|	66.2	4e-10	Liprin-beta-1 [Camponotus floridanus]
CL1698.Contig1_CmRNA	958	422	50.2644	gi|260908010|gb|ACX53804.1|	210	7e-53	chemosensory protein [Heliothis virescens]
CL1699.Contig1_CmRNA	675	40	6.7619	gi|296233836|ref|XP_002762178.1|	80.1	7e-14	PREDICTED: periaxin [Callithrix jacchus]
CL1699.Contig2_CmRNA	637	34	6.0905	gi|296233836|ref|XP_002762178.1|	79.7	8e-14	PREDICTED: periaxin [Callithrix jacchus]
CL170.Contig1_CmRNA	441	11	2.8462	gi|156549032|ref|XP_001607937.1|	227	1e-58	PREDICTED: glycerol-3-phosphate dehydrogenase [NAD+], cytoplasmic [Nasonia vitripennis]
CL170.Contig2_CmRNA	394	20	5.7923	gi|156549032|ref|XP_001607937.1|	231	7e-60	PREDICTED: glycerol-3-phosphate dehydrogenase [NAD+], cytoplasmic [Nasonia vitripennis]
CL1700.Contig1_CmRNA	1412	548	44.2853	gi|7271961|gb|AAF44710.1|AF243047_1	685	0	fat body acyl-CoA delta-9 desaturase [Ostrinia nubilalis] >gi|16797677|gb|AAL27033.1| acyl-CoA delta-9 desaturase [Ostrinia furnacalis]
CL1701.Contig1_CmRNA	682	69	11.5446	gi|256772701|emb|CBB07053.1|	349	7e-95	CYP6AE30 protein [Cnaphalocrocis medinalis]
CL1701.Contig2_CmRNA	235	13	6.3123	gi|301386936|emb|CBW30577.1|	123	2e-27	CYP6-2 protein [Cnaphalocrocis medinalis]
CL1701.Contig3_CmRNA	217	7	3.6809	gi|301386936|emb|CBW30577.1|	120	1e-26	CYP6-2 protein [Cnaphalocrocis medinalis]
CL1709.Contig1_CmRNA	1061	16	1.7208	gi|22761812|dbj|BAC11714.1|	696	0	ecdysone receptor B1 isoform [Chilo suppressalis]
CL1709.Contig2_CmRNA	1046	23	2.5091	gi|151327629|gb|ABS00249.1|	689	0	ecdysone receptor B1 isoform [Omphisa fuscidentalis]
CL171.Contig1_CmRNA	3711	1041	32.0091	gi|170045448|ref|XP_001850321.1|	534	1e-149	glycoside hydrolase [Culex quinquefasciatus] >gi|167868490|gb|EDS31873.1| glycoside hydrolase [Culex quinquefasciatus]
CL171.Contig2_CmRNA	2278	395	19.786	gi|158285602|ref|XP_308390.4|	404	1e-110	AGAP007483-PA [Anopheles gambiae str. PEST] >gi|157020071|gb|EAA04375.4| AGAP007483-PA [Anopheles gambiae str. PEST]
CL1710.Contig1_CmRNA	771	37	5.476	gi|298204339|gb|ADI61818.1|	112	6e-42	endonuclease-reverse transcriptase [Bombyx mori]
CL1710.Contig2_CmRNA	761	115	17.2436	gi|298204323|gb|ADI61810.1|	276	9e-73	endonuclease-reverse transcriptase [Bombyx mori]
CL1712.Contig1_CmRNA	749	52	7.922	gi|307211141|gb|EFN87359.1|	365	1e-100	Probable queuine tRNA-ribosyltransferase [Harpegnathos saltator]
CL1712.Contig2_CmRNA	614	4	0.7434	gi|307211141|gb|EFN87359.1|	270	4e-71	Probable queuine tRNA-ribosyltransferase [Harpegnathos saltator]
CL1713.Contig1_CmRNA	459	39	9.6954	gi|58389845|ref|XP_317316.2|	296	1e-79	AGAP008147-PA [Anopheles gambiae str. PEST] >gi|74802307|sp|Q7Q412.2|RTCB_ANOGA RecName: Full=tRNA-splicing ligase RtcB homolog >gi|55237536|gb|EAA12412.2| AGAP008147-PA [Anopheles gambiae str. PEST]
CL1719.Contig1_CmRNA	705	144	23.307	gi|326632041|gb|ADZ99023.1|	340	4e-92	DRK [Bombyx mori]
CL1720.Contig1_CmRNA	394	897	259.783	gi|118361401|ref|XP_001013929.1|	102	7e-21	SCP-like extracellular protein [Tetrahymena thermophila] >gi|89295696|gb|EAR93684.1| SCP-like extracellular protein [Tetrahymena thermophila SB210]
CL1720.Contig2_CmRNA	216	90	47.5447	gi|164448672|ref|NP_001106733.1|	77.8	1e-13	fibroin heavy chain precursor [Bombyx mori] >gi|9087216|sp|P05790.4|FIBH_BOMMO RecName: Full=Fibroin heavy chain; Short=Fib-H; AltName: Full=H-fibroin; Flags: Precursor >gi|8572061|gb|AAF76983.1|AF226688_1 fibroin heavy chain Fib-H [Bombyx mori]
CL1723.Contig1_CmRNA	598	12	2.2898	gi|328705773|ref|XP_001946402.2|	108	2e-22	PREDICTED: constitutive coactivator of PPAR-gamma-like protein 1-like [Acyrthosiphon pisum]
CL1723.Contig2_CmRNA	389	5	1.4667	gi|340726702|ref|XP_003401692.1|	97.4	2e-19	PREDICTED: constitutive coactivator of PPAR-gamma-like protein 1 homolog [Bombus terrestris]
CL1726.Contig1_CmRNA	285	41	16.4154	gi|333469644|gb|EAA14376.5|	76.6	3e-13	AGAP009877-PA [Anopheles gambiae str. PEST]
CL1729.Contig1_CmRNA	1851	617	38.0358	gi|282400162|ref|NP_001164204.1|	179	3e-43	hexamerin 5 [Tribolium castaneum]
CL173.Contig1_CmRNA	1473	292	22.6201	gi|195117180|ref|XP_002003127.1|	148	8e-34	GI17743 [Drosophila mojavensis] >gi|193913702|gb|EDW12569.1| GI17743 [Drosophila mojavensis]
CL1730.Contig1_CmRNA	952	57	6.8321	gi|62082409|gb|AAX62032.1|	327	6e-88	trypsin-like serine protease [Ostrinia nubilalis]
CL1730.Contig2_CmRNA	894	10	1.2764	gi|62082409|gb|AAX62032.1|	325	1e-87	trypsin-like serine protease [Ostrinia nubilalis]
CL1730.Contig3_CmRNA	239	65	31.0334	gi|8347664|gb|AAF74746.1|AF261984_1	96.7	3e-19	trypsin precursor Hz42 [Helicoverpa zea]
CL1732.Contig1_CmRNA	722	54	8.5343	gi|48104740|ref|XP_395839.1|	249	1e-64	PREDICTED: vacuolar protein-sorting-associated protein 25 [Apis mellifera]
CL1732.Contig2_CmRNA	721	19	3.007	gi|48104740|ref|XP_395839.1|	212	1e-53	PREDICTED: vacuolar protein-sorting-associated protein 25 [Apis mellifera]
CL174.Contig1_CmRNA	784	226	32.8932	gi|33860163|sp|P82176.2|IMPI_GALME	164	4e-39	RecName: Full=Inducible metalloproteinase inhibitor protein; Contains: RecName: Full=IMPI alpha; Flags: Precursor >gi|33145975|emb|CAE12200.1| inducible metalloproteinase inhibitor protein [Galleria mellonella] >gi|34485736|gb|AAQ73240.1| inducible metalloproteinase inhibitor [Galleria mellonella]
CL174.Contig2_CmRNA	695	187	30.7023	gi|33860163|sp|P82176.2|IMPI_GALME	142	2e-32	RecName: Full=Inducible metalloproteinase inhibitor protein; Contains: RecName: Full=IMPI alpha; Flags: Precursor >gi|33145975|emb|CAE12200.1| inducible metalloproteinase inhibitor protein [Galleria mellonella] >gi|34485736|gb|AAQ73240.1| inducible metalloproteinase inhibitor [Galleria mellonella]
CL1741.Contig1_CmRNA	690	9	1.4884	gi|66549206|ref|XP_393305.2|	258	2e-67	PREDICTED: beta-glucuronidase-like [Apis mellifera]
CL1741.Contig2_CmRNA	664	3	0.5155	gi|66549206|ref|XP_393305.2|	258	1e-67	PREDICTED: beta-glucuronidase-like [Apis mellifera]
CL1747.Contig1_CmRNA	280	7	2.8527	gi|332105415|gb|AEE01340.1|	127	1e-28	neuropeptide F1 [Ostrinia nubilalis]
CL1747.Contig2_CmRNA	255	1	0.4475	gi|332105415|gb|AEE01340.1|	97.1	2e-19	neuropeptide F1 [Ostrinia nubilalis]
CL1748.Contig1_CmRNA	1184	1052	101.386	gi|156546886|ref|NP_001037028.1|	285	2e-98	ornithine decarboxylase antizyme [Bombyx mori] >gi|10304393|gb|AAG16235.1|AF291575_1 ornithine decarboxylase antizyme [Bombyx mori]
CL1748.Contig2_CmRNA	988	33	3.8113	gi|156546886|ref|NP_001037028.1|	285	2e-92	ornithine decarboxylase antizyme [Bombyx mori] >gi|10304393|gb|AAG16235.1|AF291575_1 ornithine decarboxylase antizyme [Bombyx mori]
CL1750.Contig1_CmRNA	1032	311	34.387	gi|332026850|gb|EGI66953.1|	302	2e-80	Valacyclovir hydrolase [Acromyrmex echinatior]
CL1751.Contig1_CmRNA	1615	45	3.1795	gi|170064403|ref|XP_001867511.1|	568	1e-160	inwardly rectifying k+ channel [Culex quinquefasciatus] >gi|167881801|gb|EDS45184.1| inwardly rectifying k+ channel [Culex quinquefasciatus]
CL1751.Contig2_CmRNA	1527	57	4.2594	gi|170064403|ref|XP_001867511.1|	568	1e-160	inwardly rectifying k+ channel [Culex quinquefasciatus] >gi|167881801|gb|EDS45184.1| inwardly rectifying k+ channel [Culex quinquefasciatus]
CL1754.Contig1_CmRNA	916	73	9.0937	gi|114053035|ref|NP_001040501.1|	99	3e-19	legumaturain [Bombyx mori] >gi|95103152|gb|ABF51517.1| legumaturain [Bombyx mori]
CL1754.Contig2_CmRNA	871	1	0.131	gi|114053035|ref|NP_001040501.1|	99	2e-19	legumaturain [Bombyx mori] >gi|95103152|gb|ABF51517.1| legumaturain [Bombyx mori]
CL1756.Contig1_CmRNA	593	134	25.7848	gi|340727994|ref|XP_003402318.1|	62.4	1e-08	PREDICTED: hypothetical protein LOC100648920 [Bombus terrestris]
CL1757.Contig1_CmRNA	858	11	1.4629	gi|189236786|ref|XP_968601.2|	103	1e-20	PREDICTED: similar to apoptosis stimulating of P53 [Tribolium castaneum]
CL1757.Contig2_CmRNA	2061	277	15.3361	gi|189236786|ref|XP_968601.2|	483	1e-134	PREDICTED: similar to apoptosis stimulating of P53 [Tribolium castaneum]
CL1762.Contig1_CmRNA	202	2	1.1298	gi|340728097|ref|XP_003402367.1|	128	7e-29	PREDICTED: WD repeat-containing protein 61-like isoform 2 [Bombus terrestris]
CL1762.Contig2_CmRNA	200	0	0	gi|340728097|ref|XP_003402367.1|	110	2e-23	PREDICTED: WD repeat-containing protein 61-like isoform 2 [Bombus terrestris]
CL1767.Contig1_CmRNA	1044	0	0	gi|239835734|ref|NP_001155190.1|	360	6e-98	tau-like protein [Bombyx mori] >gi|228551836|gb|ACQ44664.1| tau-like protein [Bombyx mori]
CL1767.Contig2_CmRNA	1013	4	0.4506	gi|239835734|ref|NP_001155190.1|	360	6e-98	tau-like protein [Bombyx mori] >gi|228551836|gb|ACQ44664.1| tau-like protein [Bombyx mori]
CL1767.Contig3_CmRNA	927	0	0	gi|239835734|ref|NP_001155190.1|	340	4e-92	tau-like protein [Bombyx mori] >gi|228551836|gb|ACQ44664.1| tau-like protein [Bombyx mori]
CL1767.Contig4_CmRNA	896	0	0	gi|189234597|ref|XP_974985.2|	343	6e-93	PREDICTED: similar to tau CG31057-PA [Tribolium castaneum]
CL1768.Contig1_CmRNA	1120	57	5.8072	gi|332028072|gb|EGI68123.1|	368	1e-100	Ubiquitin-conjugating enzyme E2-24 kDa [Acromyrmex echinatior]
CL1768.Contig2_CmRNA	1092	29	3.0303	gi|332028072|gb|EGI68123.1|	366	1e-100	Ubiquitin-conjugating enzyme E2-24 kDa [Acromyrmex echinatior]
CL1768.Contig3_CmRNA	322	23	8.1505	gi|332028072|gb|EGI68123.1|	231	7e-60	Ubiquitin-conjugating enzyme E2-24 kDa [Acromyrmex echinatior]
CL1769.Contig1_CmRNA	543	10	2.1014	gi|328725571|ref|XP_001943693.2|	91.7	4e-37	PREDICTED: beta carbonic anhydrase 1-like [Acyrthosiphon pisum]
CL1769.Contig2_CmRNA	463	17	4.1897	gi|156547528|ref|XP_001606972.1|	180	1e-44	PREDICTED: beta carbonic anhydrase 1-like [Nasonia vitripennis]
CL1770.Contig1_CmRNA	1379	14	1.1585	gi|119888032|gb|ABM05967.1|	694	0	guanine nucleotide-binding protein subunit beta-like [Microplitis mediator]
CL1770.Contig2_CmRNA	1364	19	1.5895	gi|119888032|gb|ABM05967.1|	701	0	guanine nucleotide-binding protein subunit beta-like [Microplitis mediator]
CL1772.Contig1_CmRNA	791	10	1.4426	gi|340725692|ref|XP_003401200.1|	367	1e-100	PREDICTED: fragile X mental retardation syndrome-related protein 1-like isoform 3 [Bombus terrestris]
CL1772.Contig2_CmRNA	695	9	1.4776	gi|340725688|ref|XP_003401198.1|	329	6e-89	PREDICTED: fragile X mental retardation syndrome-related protein 1-like isoform 1 [Bombus terrestris] >gi|340725690|ref|XP_003401199.1| PREDICTED: fragile X mental retardation syndrome-related protein 1-like isoform 2 [Bombus terrestris]
CL1774.Contig1_CmRNA	2006	645	36.6896	gi|158298546|ref|XP_001689143.1|	120	2e-25	AGAP009672-PA [Anopheles gambiae str. PEST] >gi|157013935|gb|EDO63416.1| AGAP009672-PA [Anopheles gambiae str. PEST]
CL1775.Contig1_CmRNA	454	382	96.011	gi|260908012|gb|ACX53805.1|	137	1e-31	estradiol 17-beta-dehydrogenase [Heliothis virescens]
CL1776.Contig1_CmRNA	1089	9	0.943	gi|110749378|ref|XP_624097.2|	333	1e-89	PREDICTED: hyccin-like [Apis mellifera]
CL1776.Contig2_CmRNA	1707	129	8.6232	gi|110749378|ref|XP_624097.2|	431	1e-119	PREDICTED: hyccin-like [Apis mellifera]
CL1782.Contig1_CmRNA	254	3	1.3477	gi|290563223|ref|NP_001166685.1|	124	2e-27	cuticular protein RR-2 motif 75 [Bombyx mori]
CL1782.Contig2_CmRNA	235	8	3.8845	gi|290563223|ref|NP_001166685.1|	108	7e-23	cuticular protein RR-2 motif 75 [Bombyx mori]
CL1785.Contig1_CmRNA	403	74	20.9527	gi|225703088|ref|NP_001139536.1|	246	2e-64	mortality factor 4-like [Bombyx mori] >gi|116518235|gb|ABJ99463.1| mrg15-like protein [Bombyx mori]
CL1787.Contig1_CmRNA	850	130	17.4517	gi|328793847|ref|XP_625157.2|	333	4e-90	PREDICTED: ubiquitin-conjugating enzyme E2 G2 [Apis mellifera]
CL1787.Contig2_CmRNA	206	18	9.9705	gi|238814340|ref|NP_001154931.1|	141	8e-33	courtless [Nasonia vitripennis]
CL1791.Contig1_CmRNA	1172	61	5.939	gi|307212700|gb|EFN88386.1|	407	1e-112	Proactivator polypeptide [Harpegnathos saltator]
CL1791.Contig2_CmRNA	1005	5	0.5677	gi|307212700|gb|EFN88386.1|	336	1e-90	Proactivator polypeptide [Harpegnathos saltator]
CL1798.Contig1_CmRNA	549	17	3.5334	gi|332024104|gb|EGI64320.1|	218	1e-55	Transmembrane protein C9orf91-like protein [Acromyrmex echinatior]
CL1798.Contig2_CmRNA	342	7	2.3355	gi|332024104|gb|EGI64320.1|	204	7e-52	Transmembrane protein C9orf91-like protein [Acromyrmex echinatior]
CL18.Contig2_CmRNA	1159	3264	321.351	gi|148298796|ref|NP_001091804.1|	196	2e-48	thioredoxin-like protein [Bombyx mori] >gi|116272511|gb|ABJ97191.1| thioredoxin-like protein [Bombyx mori] >gi|124127033|gb|ABM92269.1| thioredoxin [Bombyx mori]
CL180.Contig1_CmRNA	607	19	3.5717	gi|118782185|ref|XP_312107.3|	263	5e-69	AGAP002807-PA [Anopheles gambiae str. PEST]
CL180.Contig2_CmRNA	762	62	9.2843	gi|195480258|ref|XP_002101200.1|	272	1e-71	GE17489 [Drosophila yakuba] >gi|194188724|gb|EDX02308.1| GE17489 [Drosophila yakuba]
CL1801.Contig1_CmRNA	1153	28	2.771	gi|268560942|ref|XP_002638195.1|	106	2e-21	Hypothetical protein CBG22624 [Caenorhabditis briggsae]
CL1801.Contig2_CmRNA	1126	1	0.1013	gi|268561050|ref|XP_002638223.1|	94	1e-17	Hypothetical protein CBG22657 [Caenorhabditis briggsae]
CL1801.Contig3_CmRNA	744	6	0.9202	gi|268560942|ref|XP_002638195.1|	106	1e-21	Hypothetical protein CBG22624 [Caenorhabditis briggsae]
CL1801.Contig4_CmRNA	717	1	0.1591	gi|268561050|ref|XP_002638223.1|	94	5e-18	Hypothetical protein CBG22657 [Caenorhabditis briggsae]
CL1804.Contig1_CmRNA	231	119	58.7826	gi|156542046|ref|XP_001601390.1|	153	2e-36	PREDICTED: 40S ribosomal protein S18-like [Nasonia vitripennis]
CL1804.Contig2_CmRNA	576	13239	2622.69	gi|54039447|sp|Q962R1.1|RS18_SPOFR	307	2e-82	RecName: Full=40S ribosomal protein S18 >gi|15213824|gb|AAK92187.1|AF400215_1 ribosomal protein S18 [Spodoptera frugiperda] >gi|48958395|dbj|BAD23920.1| ribosomal protein S18 [Antheraea yamamai] >gi|268306384|gb|ACY95313.1| ribosomal protein S18 [Manduca sexta] >gi|315115383|gb|ADT80664.1| ribosomal protein S18 [Euphydryas aurinia]
CL1805.Contig1_CmRNA	532	24	5.1477	gi|340722352|ref|XP_003399571.1|	326	2e-88	PREDICTED: splicing factor 1-like [Bombus terrestris]
CL1805.Contig2_CmRNA	447	14	3.5738	gi|340722352|ref|XP_003399571.1|	243	2e-63	PREDICTED: splicing factor 1-like [Bombus terrestris]
CL1806.Contig1_CmRNA	388	3	0.8823	gi|298204341|gb|ADI61819.1|	79.7	2e-16	endonuclease-reverse transcriptase [Bombyx mori]
CL1807.Contig1_CmRNA	647	498	87.8292	gi|56462340|gb|AAV91453.1|	96.3	9e-19	protease inhibitor 6 [Lonomia obliqua]
CL1807.Contig2_CmRNA	362	24	7.5651	gi|56462340|gb|AAV91453.1|	106	3e-22	protease inhibitor 6 [Lonomia obliqua]
CL1808.Contig1_CmRNA	1996	207	11.8338	gi|189237669|ref|XP_967427.2|	131	1e-28	PREDICTED: similar to hypoxia-inducible factor 1 alpha [Tribolium castaneum]
CL1808.Contig2_CmRNA	1195	12	1.1458	gi|189237669|ref|XP_967427.2|	131	7e-29	PREDICTED: similar to hypoxia-inducible factor 1 alpha [Tribolium castaneum]
CL1808.Contig3_CmRNA	1156	28	2.7638	gi|189237669|ref|XP_967427.2|	129	3e-28	PREDICTED: similar to hypoxia-inducible factor 1 alpha [Tribolium castaneum]
CL182.Contig1_CmRNA	892	0	0	gi|112982956|ref|NP_001037676.1|	221	3e-56	splicing factor arginine/serine-rich 6 [Bombyx mori] >gi|109706819|gb|ABG42996.1| splicing factor arginine/serine-rich 6 [Bombyx mori]
CL182.Contig2_CmRNA	874	0	0	gi|112982956|ref|NP_001037676.1|	229	1e-58	splicing factor arginine/serine-rich 6 [Bombyx mori] >gi|109706819|gb|ABG42996.1| splicing factor arginine/serine-rich 6 [Bombyx mori]
CL182.Contig3_CmRNA	826	0	0	gi|112982956|ref|NP_001037676.1|	221	2e-56	splicing factor arginine/serine-rich 6 [Bombyx mori] >gi|109706819|gb|ABG42996.1| splicing factor arginine/serine-rich 6 [Bombyx mori]
CL182.Contig4_CmRNA	808	0	0	gi|112982956|ref|NP_001037676.1|	229	1e-58	splicing factor arginine/serine-rich 6 [Bombyx mori] >gi|109706819|gb|ABG42996.1| splicing factor arginine/serine-rich 6 [Bombyx mori]
CL182.Contig5_CmRNA	715	0	0	gi|112982956|ref|NP_001037676.1|	345	1e-93	splicing factor arginine/serine-rich 6 [Bombyx mori] >gi|109706819|gb|ABG42996.1| splicing factor arginine/serine-rich 6 [Bombyx mori]
CL182.Contig6_CmRNA	697	2	0.3274	gi|112982956|ref|NP_001037676.1|	352	6e-96	splicing factor arginine/serine-rich 6 [Bombyx mori] >gi|109706819|gb|ABG42996.1| splicing factor arginine/serine-rich 6 [Bombyx mori]
CL182.Contig7_CmRNA	519	3	0.6596	gi|239790646|dbj|BAH71871.1|	60.1	4e-08	ACYPI003349 [Acyrthosiphon pisum]
CL1825.Contig1_CmRNA	543	12	2.5217	gi|110749350|ref|XP_393349.3|	217	2e-55	PREDICTED: DNA replication factor Cdt1 [Apis mellifera]
CL1825.Contig2_CmRNA	460	5	1.2403	gi|110749350|ref|XP_393349.3|	155	5e-37	PREDICTED: DNA replication factor Cdt1 [Apis mellifera]
CL1828.Contig1_CmRNA	1131	173	17.4541	gi|345485521|ref|XP_003425288.1|	657	0	PREDICTED: COP9 signalosome complex subunit 2-like isoform 2 [Nasonia vitripennis]
CL1828.Contig2_CmRNA	411	20	5.5527	gi|345485521|ref|XP_003425288.1|	271	6e-72	PREDICTED: COP9 signalosome complex subunit 2-like isoform 2 [Nasonia vitripennis]
CL1830.Contig1_CmRNA	527	20	4.3304	gi|328714070|ref|XP_001949199.2|	137	2e-31	PREDICTED: cyclin-dependent kinase-like 1-like [Acyrthosiphon pisum]
CL1830.Contig2_CmRNA	371	4	1.2303	gi|328714070|ref|XP_001949199.2|	138	8e-32	PREDICTED: cyclin-dependent kinase-like 1-like [Acyrthosiphon pisum]
CL1833.Contig1_CmRNA	693	20	3.2931	gi|169218417|gb|ACA50099.1|	111	3e-23	reverse transcriptase-like protein [Ectropis obliqua]
CL1833.Contig2_CmRNA	679	21	3.5291	gi|169218417|gb|ACA50099.1|	114	5e-24	reverse transcriptase-like protein [Ectropis obliqua]
CL1837.Contig1_CmRNA	1237	10	0.9225	gi|307179084|gb|EFN67556.1|	477	1e-133	RNA-binding protein 14 [Camponotus floridanus]
CL1837.Contig2_CmRNA	1195	23	2.1962	gi|307179084|gb|EFN67556.1|	454	1e-126	RNA-binding protein 14 [Camponotus floridanus]
CL1842.Contig1_CmRNA	897	252	32.0569	gi|194913004|ref|XP_001982608.1|	156	1e-36	GG12911 [Drosophila erecta] >gi|190648284|gb|EDV45577.1| GG12911 [Drosophila erecta]
CL1843.Contig1_CmRNA	733	29	4.5145	gi|307180774|gb|EFN68643.1|	255	1e-66	Neurotrimin [Camponotus floridanus]
CL1843.Contig2_CmRNA	718	44	6.9927	gi|189234391|ref|XP_974849.2|	252	9e-66	PREDICTED: similar to GA16498-PA [Tribolium castaneum]
CL1852.Contig1_CmRNA	1736	25	1.6433	gi|189236763|ref|XP_975380.2|	367	1e-100	PREDICTED: similar to YLP motif containing 1 [Tribolium castaneum]
CL1852.Contig2_CmRNA	1681	33	2.2401	gi|189236763|ref|XP_975380.2|	242	1e-93	PREDICTED: similar to YLP motif containing 1 [Tribolium castaneum]
CL186.Contig1_CmRNA	1172	213	20.7379	gi|156537496|ref|XP_001608056.1|	398	1e-109	PREDICTED: clavesin-1-like [Nasonia vitripennis]
CL1861.Contig1_CmRNA	378	21	6.3393	gi|340713851|ref|XP_003395448.1|	228	5e-59	PREDICTED: sodium/potassium-transporting ATPase subunit alpha-like [Bombus terrestris]
CL1861.Contig2_CmRNA	290	10	3.9347	gi|340713851|ref|XP_003395448.1|	190	2e-47	PREDICTED: sodium/potassium-transporting ATPase subunit alpha-like [Bombus terrestris]
CL1864.Contig1_CmRNA	733	91	14.1661	gi|345488546|ref|XP_001601650.2|	107	7e-22	PREDICTED: retinol dehydrogenase 11-like [Nasonia vitripennis]
CL1866.Contig1_CmRNA	1435	484	38.4864	gi|306518642|ref|NP_001182383.1|	894	0	Bm8 interacting protein 2d-4 [Bombyx mori] >gi|296040408|dbj|BAJ07616.1| Bm8 interacting protein 2d-4 [Bombyx mori]
CL1866.Contig2_CmRNA	857	70	9.3203	gi|306518642|ref|NP_001182383.1|	551	1e-155	Bm8 interacting protein 2d-4 [Bombyx mori] >gi|296040408|dbj|BAJ07616.1| Bm8 interacting protein 2d-4 [Bombyx mori]
CL1869.Contig1_CmRNA	623	51	9.3411	gi|170054457|ref|XP_001863138.1|	57.8	3e-07	leucine-rich transmembrane protein [Culex quinquefasciatus] >gi|167874744|gb|EDS38127.1| leucine-rich transmembrane protein [Culex quinquefasciatus]
CL1873.Contig1_CmRNA	365	12	3.7515	gi|270002870|gb|EEZ99317.1|	226	2e-58	groucho-like protein [Tribolium castaneum]
CL1873.Contig2_CmRNA	1116	224	22.9033	gi|201025390|ref|NP_001128361.1|	625	1e-178	groucho [Bombyx mori] >gi|194399145|gb|ACF60606.1| groucho protein [Bombyx mori]
CL1875.Contig1_CmRNA	893	161	20.5725	gi|307173781|gb|EFN64568.1|	303	9e-81	Spectrin beta chain, brain 4 [Camponotus floridanus]
CL1875.Contig2_CmRNA	342	9	3.0028	gi|307173781|gb|EFN64568.1|	154	1e-36	Spectrin beta chain, brain 4 [Camponotus floridanus]
CL1876.Contig1_CmRNA	1577	2248	162.659	gi|156549026|ref|XP_001607355.1|	403	1e-110	PREDICTED: heterogeneous nuclear ribonucleoprotein A1, A2/B1 homolog [Nasonia vitripennis]
CL1877.Contig1_CmRNA	751	1475	224.112	gi|290560620|ref|NP_001166636.1|	147	5e-34	cuticular protein RR-2 motif 134 [Bombyx mori]
CL1877.Contig2_CmRNA	730	9405	1470.11	gi|290560620|ref|NP_001166636.1|	150	7e-35	cuticular protein RR-2 motif 134 [Bombyx mori]
CL1877.Contig3_CmRNA	709	2990	481.214	gi|290560620|ref|NP_001166636.1|	150	6e-35	cuticular protein RR-2 motif 134 [Bombyx mori]
CL1878.Contig1_CmRNA	3298	1650	57.0883	gi|340709439|ref|XP_003393317.1|	1427	0	PREDICTED: plexin-A4-like [Bombus terrestris]
CL188.Contig1_CmRNA	503	34	7.713	gi|332026735|gb|EGI66844.1|	94.4	2e-18	Receptor-interacting serine/threonine-protein kinase 1 [Acromyrmex echinatior]
CL188.Contig2_CmRNA	305	8	2.993	gi|332026735|gb|EGI66844.1|	109	3e-23	Receptor-interacting serine/threonine-protein kinase 1 [Acromyrmex echinatior]
CL1881.Contig1_CmRNA	975	1340	156.825	gi|225346695|gb|ACN86370.1|	406	1e-112	troponin I transcript variant C [Bombyx mandarina]
CL1881.Contig2_CmRNA	957	1320	157.389	gi|164451507|gb|ABY56688.1|	389	1e-107	troponin I [Loxostege sticticalis]
CL1882.Contig1_CmRNA	2054	509	28.2768	gi|326670276|ref|XP_003199179.1|	176	3e-42	PREDICTED: uncharacterized protein K02A2.6-like [Danio rerio]
CL1882.Contig2_CmRNA	1178	449	43.4925	gi|115772515|ref|XP_001179791.1|	97.4	1e-18	PREDICTED: similar to transposase [Strongylocentrotus purpuratus] >gi|115968550|ref|XP_001184972.1| PREDICTED: similar to transposase [Strongylocentrotus purpuratus]
CL1884.Contig1_CmRNA	1529	10	0.7463	gi|91082165|ref|XP_970726.1|	349	2e-94	PREDICTED: similar to carnitine o-acetyltransferase [Tribolium castaneum]
CL1884.Contig2_CmRNA	1493	17	1.2993	gi|91082165|ref|XP_970726.1|	349	2e-94	PREDICTED: similar to carnitine o-acetyltransferase [Tribolium castaneum]
CL1886.Contig1_CmRNA	616	41	7.5948	gi|307204651|gb|EFN83273.1|	154	3e-36	Titin [Harpegnathos saltator]
CL1887.Contig1_CmRNA	2248	36	1.8273	gi|158290026|ref|XP_311599.4|	658	0	AGAP010343-PA [Anopheles gambiae str. PEST] >gi|221272049|sp|Q7PRJ0.4|CTLH2_ANOGA RecName: Full=CTL-like protein 2 >gi|157018441|gb|EAA07143.5| AGAP010343-PA [Anopheles gambiae str. PEST]
CL1887.Contig2_CmRNA	2152	24	1.2726	gi|157127935|ref|XP_001661235.1|	649	0	ctl2 [Aedes aegypti] >gi|108882295|gb|EAT46520.1| ctl2 [Aedes aegypti]
CL1887.Contig3_CmRNA	1757	3	0.1948	gi|189234930|ref|XP_971266.2|	532	1e-149	PREDICTED: similar to ctl2 [Tribolium castaneum]
CL1888.Contig1_CmRNA	963	53	6.2801	gi|1465873|dbj|BAA07211.1|	159	2e-37	Bmsqd-2 [Bombyx mori]
CL1888.Contig2_CmRNA	900	92	11.6643	gi|1465873|dbj|BAA07211.1|	167	6e-40	Bmsqd-2 [Bombyx mori]
CL1892.Contig1_CmRNA	749	14	2.1328	gi|114050873|ref|NP_001040412.1|	237	3e-61	transcription elongation factor B polypeptide 1 [Bombyx mori] >gi|95102792|gb|ABF51337.1| transcription elongation factor B polypeptide 1 [Bombyx mori]
CL1892.Contig2_CmRNA	716	7	1.1156	gi|114050873|ref|NP_001040412.1|	237	3e-61	transcription elongation factor B polypeptide 1 [Bombyx mori] >gi|95102792|gb|ABF51337.1| transcription elongation factor B polypeptide 1 [Bombyx mori]
CL1893.Contig1_CmRNA	881	60	7.7712	gi|307211897|gb|EFN87824.1|	243	8e-63	Tumor protein D54 [Harpegnathos saltator]
CL1893.Contig2_CmRNA	821	55	7.6442	gi|307179237|gb|EFN67633.1|	221	4e-56	Tumor protein D54 [Camponotus floridanus]
CL1898.Contig1_CmRNA	1148	10	0.994	gi|114052514|ref|NP_001040249.1|	398	1e-109	homocysteine S-methyltransferase [Bombyx mori] >gi|87248513|gb|ABD36309.1| homocysteine S-methyltransferase [Bombyx mori]
CL1898.Contig2_CmRNA	1135	3	0.3016	gi|114052514|ref|NP_001040249.1|	398	1e-109	homocysteine S-methyltransferase [Bombyx mori] >gi|87248513|gb|ABD36309.1| homocysteine S-methyltransferase [Bombyx mori]
CL19.Contig1_CmRNA	1916	4113	244.95	gi|91083015|ref|XP_974607.1|	339	3e-91	PREDICTED: similar to CRALBP [Tribolium castaneum]
CL190.Contig1_CmRNA	818	44	6.1378	gi|328787651|ref|XP_393282.4|	361	2e-98	PREDICTED: SAFB-like transcription modulator-like [Apis mellifera]
CL190.Contig2_CmRNA	514	4	0.888	gi|307194386|gb|EFN76709.1|	227	1e-58	Scaffold attachment factor B2 [Harpegnathos saltator]
CL1900.Contig1_CmRNA	516	44	9.7301	gi|23480555|gb|EAA17085.1|	88.2	1e-16	STARP antigen [Plasmodium yoelii yoelii]
CL1901.Contig1_CmRNA	584	232	45.3303	gi|326579958|gb|ADZ96259.1|	182	1e-44	robl [Bombyx mori]
CL1906.Contig1_CmRNA	317	183	65.8727	gi|15011842|ref|NP_032600.2|	55.1	9e-07	sperm mitochondrial-associated cysteine-rich protein [Mus musculus] >gi|14717800|gb|AAB08438.2| selenoprotein [Mus musculus] >gi|34783578|gb|AAH55104.2| Sperm mitochondria-associated cysteine-rich protein [Mus musculus] >gi|38173971|gb|AAH61167.1| Sperm mitochondria-associated cysteine-rich protein [Mus musculus]
CL1907.Contig1_CmRNA	2267	856	43.086	gi|126567522|dbj|BAF48334.1|	277	1e-72	serpin 1b [Plutella xylostella]
CL1908.Contig1_CmRNA	2532	162	7.3007	gi|333468845|gb|EGK97083.1|	960	0	AGAP003623-PC [Anopheles gambiae str. PEST]
CL1908.Contig2_CmRNA	2501	59	2.6919	gi|333468845|gb|EGK97083.1|	960	0	AGAP003623-PC [Anopheles gambiae str. PEST]
CL191.Contig1_CmRNA	2039	44	2.4623	gi|290561573|ref|NP_001166822.1|	1182	0	glycerol-3-phosphate dehydrogenase isoform 2 [Bombyx mori] >gi|259129669|gb|ACV95334.1| glycerol-3-phosphate dehydrogenase [Bombyx mori] >gi|259129671|gb|ACV95335.1| glycerol-3-phosphate dehydrogenase [Bombyx mori]
CL191.Contig2_CmRNA	2039	62	3.4697	gi|260166539|ref|NP_001091835.2|	1165	0	glycerol-3-phosphate dehydrogenase isoform 1 [Bombyx mori] >gi|256368051|gb|ABM46603.2| glycerol-3-phosphate dehydrogenase [Bombyx mori] >gi|259129673|gb|ACV95336.1| glycerol-3-phosphate dehydrogenase [Bombyx mori] >gi|259129675|gb|ACV95337.1| glycerol-3-phosphate dehydrogenase [Bombyx mori]
CL191.Contig3_CmRNA	1971	2	0.1158	gi|290561573|ref|NP_001166822.1|	1182	0	glycerol-3-phosphate dehydrogenase isoform 2 [Bombyx mori] >gi|259129669|gb|ACV95334.1| glycerol-3-phosphate dehydrogenase [Bombyx mori] >gi|259129671|gb|ACV95335.1| glycerol-3-phosphate dehydrogenase [Bombyx mori]
CL191.Contig4_CmRNA	1971	4	0.2316	gi|260166539|ref|NP_001091835.2|	1165	0	glycerol-3-phosphate dehydrogenase isoform 1 [Bombyx mori] >gi|256368051|gb|ABM46603.2| glycerol-3-phosphate dehydrogenase [Bombyx mori] >gi|259129673|gb|ACV95336.1| glycerol-3-phosphate dehydrogenase [Bombyx mori] >gi|259129675|gb|ACV95337.1| glycerol-3-phosphate dehydrogenase [Bombyx mori]
CL1910.Contig1_CmRNA	733	50	7.7836	gi|222101818|gb|ACM44033.1|	404	1e-111	hnRNPA/B-like 28 [Bombyx mori]
CL1910.Contig2_CmRNA	628	3	0.5451	gi|162462398|ref|NP_001104824.1|	377	1e-103	hnRNPA/B-like 28 [Bombyx mori] >gi|161334098|gb|ABX60898.1| hnRNPA/B-like protein [Bombyx mori]
CL1911.Contig1_CmRNA	793	906	130.367	gi|160333873|ref|NP_001103784.1|	226	9e-58	NADH dehydrogenase isoform 2 [Bombyx mori] >gi|95103126|gb|ABF51504.1| NADH dehydrogenase isoform 2 [Bombyx mori]
CL1911.Contig2_CmRNA	787	386	55.9663	gi|114052452|ref|NP_001040477.1|	248	3e-64	NADH dehydrogenase isoform 1 [Bombyx mori] >gi|95103062|gb|ABF51472.1| NADH dehydrogenase isoform 1 [Bombyx mori]
CL1912.Contig1_CmRNA	383	44	13.1089	gi|326578468|gb|ADZ95817.1|	167	2e-40	reverse transcriptase [Anteros formosus]
CL1913.Contig1_CmRNA	746	8	1.2237	gi|156553450|ref|XP_001601505.1|	114	3e-24	PREDICTED: steroid receptor RNA activator 1-like [Nasonia vitripennis]
CL1913.Contig2_CmRNA	736	22	3.4108	gi|156553450|ref|XP_001601505.1|	114	3e-24	PREDICTED: steroid receptor RNA activator 1-like [Nasonia vitripennis]
CL1915.Contig1_CmRNA	412	181	50.1297	gi|110347786|gb|ABG72695.1|	68.9	6e-11	attacin-like protein [Antheraea mylitta]
CL1915.Contig2_CmRNA	952	13002	1558.43	gi|1703758|sp|P50725.1|ATTA_TRINI	191	4e-47	RecName: Full=Attacin-A; Flags: Precursor >gi|1177888|gb|AAC47327.1| preproattacin A [Trichoplusia ni]
CL1917.Contig1_CmRNA	2396	718	34.1941	gi|320544026|ref|NP_001188956.1|	178	1e-42	Stretchin-Mlck, isoform Q [Drosophila melanogaster] >gi|318068626|gb|ADV37202.1| Stretchin-Mlck, isoform Q [Drosophila melanogaster]
CL1918.Contig1_CmRNA	1814	93	5.85	gi|189241520|ref|XP_968500.2|	825	0	PREDICTED: similar to trithorax protein ash2 [Tribolium castaneum]
CL1918.Contig2_CmRNA	1139	15	1.5027	gi|189241520|ref|XP_968500.2|	546	1e-154	PREDICTED: similar to trithorax protein ash2 [Tribolium castaneum]
CL192.Contig1_CmRNA	1067	49	5.2402	gi|167540622|gb|ABZ81991.1|	181	7e-44	Tyr p 3 [Tyrophagus putrescentiae]
CL192.Contig2_CmRNA	1164	77	7.5483	gi|167540622|gb|ABZ81991.1|	181	8e-44	Tyr p 3 [Tyrophagus putrescentiae]
CL192.Contig3_CmRNA	392	30	8.7327	gi|171740889|gb|ACB54939.1|	116	3e-25	trypsin [Helicoverpa armigera]
CL1921.Contig1_CmRNA	2075	227	12.4831	gi|332023448|gb|EGI63691.1|	345	4e-93	Nose resistant to fluoxetine protein 6 [Acromyrmex echinatior]
CL1921.Contig2_CmRNA	1847	55	3.3979	gi|332023448|gb|EGI63691.1|	337	9e-91	Nose resistant to fluoxetine protein 6 [Acromyrmex echinatior]
CL1922.Contig1_CmRNA	1369	2627	218.963	gi|224719|prf||1111288A	150	2e-34	gene cp2.2
CL1922.Contig2_CmRNA	202	106	59.8781	gi|118794603|ref|XP_321613.3|	53.5	3e-06	AGAP001509-PA [Anopheles gambiae str. PEST] >gi|116116374|gb|EAA01286.3| AGAP001509-PA [Anopheles gambiae str. PEST]
CL1923.Contig1_CmRNA	1492	1022	78.162	gi|91086205|ref|XP_971814.1|	123	2e-26	PREDICTED: similar to GA10165-PA [Tribolium castaneum]
CL1928.Contig1_CmRNA	1279	32	2.8549	gi|91089195|ref|XP_974485.1|	556	1e-156	PREDICTED: similar to CG33156 CG33156-PE [Tribolium castaneum]
CL1928.Contig2_CmRNA	1279	37	3.301	gi|91089195|ref|XP_974485.1|	538	1e-151	PREDICTED: similar to CG33156 CG33156-PE [Tribolium castaneum]
CL1930.Contig1_CmRNA	1184	392	37.7788	gi|158300450|ref|XP_320369.4|	296	2e-78	AGAP012165-PA [Anopheles gambiae str. PEST] >gi|157013165|gb|EAA43295.4| AGAP012165-PA [Anopheles gambiae str. PEST]
CL1932.Contig1_CmRNA	449	11	2.7955	gi|307207102|gb|EFN84911.1|	206	3e-52	ATP-sensitive inward rectifier potassium channel 12 [Harpegnathos saltator]
CL1932.Contig2_CmRNA	434	4	1.0517	gi|307183920|gb|EFN70510.1|	207	1e-52	Inward rectifier potassium channel 2 [Camponotus floridanus]
CL1933.Contig1_CmRNA	368	5	1.5504	gi|158287937|ref|XP_309810.4|	175	5e-43	AGAP010884-PA [Anopheles gambiae str. PEST] >gi|157019428|gb|EAA05472.4| AGAP010884-PA [Anopheles gambiae str. PEST]
CL1933.Contig2_CmRNA	361	5	1.5804	gi|158287937|ref|XP_309810.4|	179	3e-44	AGAP010884-PA [Anopheles gambiae str. PEST] >gi|157019428|gb|EAA05472.4| AGAP010884-PA [Anopheles gambiae str. PEST]
CL1935.Contig1_CmRNA	2219	607	31.2137	gi|6016425|sp|O76485.1|CSK2B_SPOFR	461	1e-128	RecName: Full=Casein kinase II subunit beta; Short=CK II beta >gi|3249057|gb|AAC24042.1| casein kinase II beta subunit [Spodoptera frugiperda]
CL1935.Contig2_CmRNA	832	28	3.8402	gi|6016425|sp|O76485.1|CSK2B_SPOFR	455	1e-127	RecName: Full=Casein kinase II subunit beta; Short=CK II beta >gi|3249057|gb|AAC24042.1| casein kinase II beta subunit [Spodoptera frugiperda]
CL1938.Contig1_CmRNA	990	11	1.2679	gi|71980604|ref|NP_001020990.1|	79	3e-13	UNCoordinated family member (unc-89) [Caenorhabditis elegans] >gi|54607254|gb|AAV34801.1| Uncoordinated protein 89, isoform g, partially confirmed by transcript evidence [Caenorhabditis elegans]
CL1938.Contig2_CmRNA	973	11	1.29	gi|601930|gb|AAA57152.1|	87	1e-15	neurofilament-H [Oryctolagus cuniculus]
CL1939.Contig1_CmRNA	579	413	81.3926	gi|194754874|ref|XP_001959719.1|	261	1e-68	GF11903 [Drosophila ananassae] >gi|190621017|gb|EDV36541.1| GF11903 [Drosophila ananassae]
CL1939.Contig2_CmRNA	549	2226	462.665	gi|307209216|gb|EFN86323.1|	282	6e-75	40S ribosomal protein S16 [Harpegnathos saltator] >gi|307209245|gb|EFN86352.1| 40S ribosomal protein S16 [Harpegnathos saltator]
CL194.Contig1_CmRNA	563	50	10.1339	gi|91087773|ref|XP_975069.1|	53.9	4e-06	PREDICTED: similar to sanpodo [Tribolium castaneum]
CL1941.Contig2_CmRNA	517	60	13.2426	gi|270016838|gb|EFA13284.1|	88.6	1e-16	hypothetical protein TcasGA2_TC010304 [Tribolium castaneum]
CL1941.Contig3_CmRNA	385	213	63.1295	gi|270016838|gb|EFA13284.1|	73.2	3e-12	hypothetical protein TcasGA2_TC010304 [Tribolium castaneum]
CL1943.Contig1_CmRNA	394	73	21.1417	gi|328726057|ref|XP_001950046.2|	68.9	6e-11	PREDICTED: aminopeptidase N-like [Acyrthosiphon pisum]
CL1944.Contig1_CmRNA	439	11	2.8592	gi|340723473|ref|XP_003400114.1|	258	7e-68	PREDICTED: voltage-dependent L-type calcium channel subunit beta-2-like [Bombus terrestris]
CL1944.Contig2_CmRNA	427	12	3.2068	gi|340723473|ref|XP_003400114.1|	241	9e-63	PREDICTED: voltage-dependent L-type calcium channel subunit beta-2-like [Bombus terrestris]
CL1945.Contig1_CmRNA	426	15	4.0179	gi|307181238|gb|EFN68935.1|	60.5	2e-08	hypothetical protein EAG_03512 [Camponotus floridanus] >gi|307199415|gb|EFN80040.1| hypothetical protein EAI_10740 [Harpegnathos saltator]
CL1945.Contig2_CmRNA	405	11	3.0992	gi|345494117|ref|XP_003427222.1|	59.7	4e-08	PREDICTED: hypothetical protein LOC100679761 [Nasonia vitripennis]
CL1947.Contig1_CmRNA	587	17	3.3046	gi|260907974|gb|ACX53786.1|	191	2e-47	acetyltransferase [Heliothis virescens]
CL1947.Contig2_CmRNA	559	13	2.6537	gi|260907974|gb|ACX53786.1|	191	2e-47	acetyltransferase [Heliothis virescens]
CL1948.Contig1_CmRNA	339	27	9.0882	gi|301606321|ref|XP_002932757.1|	116	3e-25	PREDICTED: zinc finger protein 135-like [Xenopus (Silurana) tropicalis]
CL1950.Contig1_CmRNA	426	26	6.9643	gi|157820841|ref|NP_001103124.1|	67.4	2e-10	platelet glycoprotein Ib alpha chain [Rattus norvegicus] >gi|149053210|gb|EDM05027.1| rCG34279 [Rattus norvegicus]
CL1950.Contig2_CmRNA	381	7	2.0965	gi|157820841|ref|NP_001103124.1|	62.8	4e-09	platelet glycoprotein Ib alpha chain [Rattus norvegicus] >gi|149053210|gb|EDM05027.1| rCG34279 [Rattus norvegicus]
CL1950.Contig3_CmRNA	315	726	262.99	gi|328751741|gb|AEB39626.1|	54.7	1e-06	FI14751p [Drosophila melanogaster]
CL1951.Contig2_CmRNA	937	232	28.2528	gi|157120338|ref|XP_001653614.1|	179	1e-43	tyrosine aminotransferase [Aedes aegypti] >gi|108874995|gb|EAT39220.1| tyrosine aminotransferase [Aedes aegypti]
CL1955.Contig1_CmRNA	393	5	1.4517	gi|327289497|ref|XP_003229461.1|	93.2	3e-18	PREDICTED: chromosome transmission fidelity protein 8 homolog [Anolis carolinensis]
CL1955.Contig2_CmRNA	377	6	1.816	gi|328782584|ref|XP_003250167.1|	92.8	4e-18	PREDICTED: chromosome transmission fidelity protein 8 homolog [Apis mellifera]
CL1956.Contig1_CmRNA	423	22	5.9347	gi|189237903|ref|XP_968529.2|	113	3e-24	PREDICTED: similar to AGAP010478-PA [Tribolium castaneum]
CL1956.Contig2_CmRNA	265	2	0.8612	gi|170059115|ref|XP_001865220.1|	57.4	2e-07	ubiquitin conjugating enzyme [Culex quinquefasciatus] >gi|251764634|sp|B0X6E8.1|AKTIP_CULQU RecName: Full=Protein crossbronx homolog >gi|167878048|gb|EDS41431.1| ubiquitin conjugating enzyme [Culex quinquefasciatus]
CL196.Contig1_CmRNA	1180	0	0	gi|340715426|ref|XP_003396214.1|	438	1e-121	PREDICTED: glucosamine-6-phosphate isomerase-like [Bombus terrestris]
CL196.Contig2_CmRNA	1093	0	0	gi|340715426|ref|XP_003396214.1|	434	1e-120	PREDICTED: glucosamine-6-phosphate isomerase-like [Bombus terrestris]
CL196.Contig3_CmRNA	1025	2	0.2226	gi|340715426|ref|XP_003396214.1|	438	1e-121	PREDICTED: glucosamine-6-phosphate isomerase-like [Bombus terrestris]
CL196.Contig4_CmRNA	938	22	2.6763	gi|340715426|ref|XP_003396214.1|	434	1e-120	PREDICTED: glucosamine-6-phosphate isomerase-like [Bombus terrestris]
CL1960.Contig1_CmRNA	954	80	9.5688	gi|270006184|gb|EFA02632.1|	69.3	2e-10	hypothetical protein TcasGA2_TC008352 [Tribolium castaneum]
CL1966.Contig1_CmRNA	244	19	8.8854	gi|198471140|ref|XP_002133671.1|	81.6	9e-15	GA23027 [Drosophila pseudoobscura pseudoobscura] >gi|198145784|gb|EDY72298.1| GA23027 [Drosophila pseudoobscura pseudoobscura]
CL1967.Contig1_CmRNA	1317	467	40.4618	gi|165875405|gb|ABY68557.1|	433	1e-119	serpin-1 variant b/c [Mamestra configurata]
CL1967.Contig2_CmRNA	1263	212	19.1534	gi|165875405|gb|ABY68557.1|	433	1e-119	serpin-1 variant b/c [Mamestra configurata]
CL1968.Contig1_CmRNA	1012	573	64.6082	gi|345483968|ref|XP_001600439.2|	358	2e-97	PREDICTED: corepressor interacting with RBPJ 1-like [Nasonia vitripennis]
CL1968.Contig2_CmRNA	278	8	3.2837	gi|340716216|ref|XP_003396596.1|	193	2e-48	PREDICTED: corepressor interacting with RBPJ 1-like [Bombus terrestris]
CL197.Contig1_CmRNA	625	1147	209.41	gi|299930649|gb|ADJ58540.1|	106	6e-22	seminal fluid protein HACP044 [Heliconius erato]
CL1971.Contig1_CmRNA	2066	322	17.7844	gi|307192600|gb|EFN75788.1|	807	0	EH domain-containing protein 1 [Harpegnathos saltator]
CL1977.Contig1_CmRNA	1192	77	7.371	gi|91082161|ref|XP_970591.1|	338	4e-91	PREDICTED: similar to AGAP010191-PA [Tribolium castaneum]
CL1977.Contig2_CmRNA	966	20	2.3625	gi|91082161|ref|XP_970591.1|	292	2e-77	PREDICTED: similar to AGAP010191-PA [Tribolium castaneum]
CL198.Contig1_CmRNA	1982	162	9.3266	gi|291464079|gb|ADE05577.1|	593	1e-167	cytochrome P450 4CG1 [Manduca sexta]
CL198.Contig2_CmRNA	1804	33	2.0873	gi|291464079|gb|ADE05577.1|	593	1e-167	cytochrome P450 4CG1 [Manduca sexta]
CL1982.Contig1_CmRNA	336	22	7.4713	gi|345487615|ref|XP_001603968.2|	99.4	4e-20	PREDICTED: protein Peter pan-like [Nasonia vitripennis]
CL1983.Contig2_CmRNA	262	9	3.9197	gi|242021903|ref|XP_002431382.1|	60.5	2e-08	conserved hypothetical protein [Pediculus humanus corporis] >gi|212516658|gb|EEB18644.1| conserved hypothetical protein [Pediculus humanus corporis]
CL1985.Contig1_CmRNA	596	79	15.125	gi|333466785|gb|EAA06100.5|	199	6e-50	AGAP003808-PA [Anopheles gambiae str. PEST]
CL1986.Contig1_CmRNA	314	8	2.9072	gi|269997336|ref|XP_002652594.1|	56.6	3e-07	out at first protein [Culex quinquefasciatus] >gi|192759133|gb|EDV73628.1| out at first protein [Culex quinquefasciatus]
CL199.Contig1_CmRNA	657	15	2.6052	gi|328788352|ref|XP_392371.3|	322	8e-87	PREDICTED: 5'-3' exoribonuclease 2 homolog [Apis mellifera]
CL199.Contig2_CmRNA	508	0	0	gi|328788352|ref|XP_392371.3|	293	3e-78	PREDICTED: 5'-3' exoribonuclease 2 homolog [Apis mellifera]
CL1991.Contig1_CmRNA	569	236	47.3275	gi|332026341|gb|EGI66470.1|	77.4	3e-13	Apolipoprotein D [Acromyrmex echinatior]
CL20.Contig1_CmRNA	545	40	8.3749	gi|158295565|ref|XP_001688829.1|	88.6	1e-16	AGAP006216-PA [Anopheles gambiae str. PEST] >gi|157016100|gb|EDO63835.1| AGAP006216-PA [Anopheles gambiae str. PEST]
CL20.Contig2_CmRNA	392	2	0.5822	gi|158295565|ref|XP_001688829.1|	88.6	8e-17	AGAP006216-PA [Anopheles gambiae str. PEST] >gi|157016100|gb|EDO63835.1| AGAP006216-PA [Anopheles gambiae str. PEST]
CL2002.Contig1_CmRNA	892	49	6.2682	gi|189242080|ref|XP_001809908.1|	285	2e-75	PREDICTED: similar to BEL12_AG transposon polyprotein [Tribolium castaneum]
CL2002.Contig2_CmRNA	506	5	1.1275	gi|195456452|ref|XP_002075145.1|	123	4e-27	GK23365 [Drosophila willistoni] >gi|194171230|gb|EDW86131.1| GK23365 [Drosophila willistoni]
CL2009.Contig1_CmRNA	274	33	13.7429	gi|345494010|ref|XP_003427202.1|	57	2e-07	PREDICTED: zinc finger CCCH domain-containing protein 28-like [Nasonia vitripennis]
CL2012.Contig1_CmRNA	774	36	5.3073	gi|198455209|ref|XP_001359903.2|	55.8	2e-06	tropomyosin 1 [Drosophila pseudoobscura pseudoobscura] >gi|198133145|gb|EAL29055.2| tropomyosin 1 [Drosophila pseudoobscura pseudoobscura]
CL2012.Contig2_CmRNA	714	789	126.093	gi|340723822|ref|XP_003400287.1|	58.2	3e-07	PREDICTED: tropomyosin-1-like isoform 1 [Bombus terrestris] >gi|340723824|ref|XP_003400288.1| PREDICTED: tropomyosin-1-like isoform 2 [Bombus terrestris]
CL2017.Contig1_CmRNA	556	55	11.2876	gi|161376773|gb|ABX71630.1|	93.6	4e-18	acyl-CoA-delta11-desaturase [Lampronia capitella]
CL2018.Contig1_CmRNA	3059	193	7.1993	gi|340711271|ref|XP_003394202.1|	1253	0	PREDICTED: sterile alpha and TIR motif-containing protein 1-like [Bombus terrestris]
CL2018.Contig2_CmRNA	2743	9	0.3744	gi|340711271|ref|XP_003394202.1|	1183	0	PREDICTED: sterile alpha and TIR motif-containing protein 1-like [Bombus terrestris]
CL202.Contig1_CmRNA	2085	2310	126.421	gi|156538551|ref|XP_001607393.1|	430	1e-118	PREDICTED: facilitated trehalose transporter Tret1-like [Nasonia vitripennis]
CL2022.Contig1_CmRNA	512	45	10.029	gi|340719848|ref|XP_003398357.1|	134	2e-30	PREDICTED: potassium voltage-gated channel protein Shab-like [Bombus terrestris]
CL2022.Contig2_CmRNA	245	8	3.726	gi|340719848|ref|XP_003398357.1|	79.3	5e-14	PREDICTED: potassium voltage-gated channel protein Shab-like [Bombus terrestris]
CL2024.Contig1_CmRNA	1140	327	32.7308	gi|27368048|gb|AAN87265.1|	171	8e-41	lysozyme [Agrius convolvuli]
CL2024.Contig2_CmRNA	973	13	1.5246	gi|27368048|gb|AAN87265.1|	171	6e-41	lysozyme [Agrius convolvuli]
CL2025.Contig1_CmRNA	889	76	9.755	gi|194876014|ref|XP_001973698.1|	164	4e-39	GG16231 [Drosophila erecta] >gi|190655481|gb|EDV52724.1| GG16231 [Drosophila erecta]
CL2025.Contig2_CmRNA	811	18	2.5326	gi|195496642|ref|XP_002095779.1|	150	6e-35	GE22590 [Drosophila yakuba] >gi|194181880|gb|EDW95491.1| GE22590 [Drosophila yakuba]
CL203.Contig1_CmRNA	4672	1929	47.1132	gi|221329866|ref|NP_572797.2|	616	1e-174	protein kinase C delta, isoform B [Drosophila melanogaster] >gi|220901748|gb|AAF48161.2| protein kinase C delta, isoform B [Drosophila melanogaster]
CL2031.Contig1_CmRNA	264	158	68.2915	gi|333469022|gb|EAA09199.6|	98.2	9e-20	AGAP004367-PA [Anopheles gambiae str. PEST]
CL2031.Contig2_CmRNA	648	2969	522.816	gi|32307458|gb|AAP79134.1|	137	3e-31	fibroin heavy chain [Ephestia kuehniella]
CL204.Contig1_CmRNA	530	432	93.0083	gi|198433126|ref|XP_002127125.1|	94.7	2e-18	PREDICTED: similar to mCG17917 [Ciona intestinalis]
CL2049.Contig1_CmRNA	895	348	44.368	gi|91076194|ref|XP_971998.1|	328	2e-88	PREDICTED: similar to caseinolytic protease, ATP-dependent, proteolytic subunit homolog [Tribolium castaneum]
CL205.Contig1_CmRNA	630	9	1.6301	gi|340722767|ref|XP_003399773.1|	191	2e-47	PREDICTED: abhydrolase domain-containing protein 4-like [Bombus terrestris]
CL205.Contig2_CmRNA	591	9	1.7377	gi|340722767|ref|XP_003399773.1|	191	2e-47	PREDICTED: abhydrolase domain-containing protein 4-like [Bombus terrestris]
CL205.Contig3_CmRNA	448	12	3.0564	gi|328791101|ref|XP_624988.3|	189	2e-47	PREDICTED: abhydrolase domain-containing protein 4-like [Apis mellifera]
CL2050.Contig1_CmRNA	784	35	5.0941	gi|194756664|ref|XP_001960596.1|	114	4e-24	GF13438 [Drosophila ananassae] >gi|190621894|gb|EDV37418.1| GF13438 [Drosophila ananassae]
CL2050.Contig2_CmRNA	757	8	1.2059	gi|194756664|ref|XP_001960596.1|	105	3e-21	GF13438 [Drosophila ananassae] >gi|190621894|gb|EDV37418.1| GF13438 [Drosophila ananassae]
CL2051.Contig1_CmRNA	298	8	3.0633	gi|115757083|ref|XP_785784.2|	56.6	3e-07	PREDICTED: similar to ankyrin 2,3/unc44 [Strongylocentrotus purpuratus] >gi|115929471|ref|XP_001195307.1| PREDICTED: similar to ankyrin 2,3/unc44 [Strongylocentrotus purpuratus]
CL2051.Contig2_CmRNA	356	37	11.8595	gi|115757083|ref|XP_785784.2|	62.4	6e-09	PREDICTED: similar to ankyrin 2,3/unc44 [Strongylocentrotus purpuratus] >gi|115929471|ref|XP_001195307.1| PREDICTED: similar to ankyrin 2,3/unc44 [Strongylocentrotus purpuratus]
CL2054.Contig1_CmRNA	509	64	14.3475	gi|114051528|ref|NP_001040354.1|	339	3e-92	cleavage and polyadenylation specific factor 5 [Bombyx mori] >gi|95102614|gb|ABF51245.1| cleavage and polyadenylation specific factor 5 [Bombyx mori]
CL2058.Contig1_CmRNA	273	244	101.986	gi|270015199|gb|EFA11647.1|	147	1e-34	hypothetical protein TcasGA2_TC010626 [Tribolium castaneum]
CL2058.Contig2_CmRNA	4588	20340	505.873	gi|170591136|ref|XP_001900327.1|	127	9e-49	Senescence-associated protein [Brugia malayi]
CL2058.Contig3_CmRNA	3204	2614	93.0951	gi|170571877|ref|XP_001891902.1|	77.4	6e-15	rRNA promoter binding protein [Brugia malayi] >gi|170572043|ref|XP_001891963.1| rRNA promoter binding protein [Brugia malayi]
CL206.Contig1_CmRNA	1036	61	6.7187	gi|189234819|ref|XP_970297.2|	366	1e-100	PREDICTED: similar to CG31064 CG31064-PB [Tribolium castaneum]
CL206.Contig2_CmRNA	601	5	0.9493	gi|195503831|ref|XP_002098818.1|	153	4e-36	GE10579 [Drosophila yakuba] >gi|194184919|gb|EDW98530.1| GE10579 [Drosophila yakuba]
CL206.Contig3_CmRNA	504	11	2.4904	gi|307208936|gb|EFN86147.1|	169	4e-41	RUN and FYVE domain-containing protein 2 [Harpegnathos saltator]
CL2062.Contig1_CmRNA	352	47	15.2359	gi|126566034|gb|ABO20845.1|	183	2e-45	trehalase-2 [Omphisa fuscidentalis]
CL2062.Contig2_CmRNA	276	12	4.9612	gi|126566034|gb|ABO20845.1|	129	3e-29	trehalase-2 [Omphisa fuscidentalis]
CL2063.Contig1_CmRNA	381	9	2.6954	gi|332022728|gb|EGI63004.1|	210	1e-53	Zinc finger protein 91 [Acromyrmex echinatior]
CL2063.Contig2_CmRNA	363	14	4.4008	gi|332022728|gb|EGI63004.1|	213	3e-54	Zinc finger protein 91 [Acromyrmex echinatior]
CL2066.Contig1_CmRNA	285	75	30.0283	gi|270004263|gb|EFA00711.1|	63.9	2e-09	hypothetical protein TcasGA2_TC003590 [Tribolium castaneum]
CL2067.Contig1_CmRNA	649	219	38.5046	gi|189239434|ref|XP_974831.2|	151	2e-35	PREDICTED: similar to 5,10-methenyltetrahydrofolate synthetase (5-formyltetrahydrofolate cyclo-ligase) [Tribolium castaneum]
CL2068.Contig1_CmRNA	3112	34	1.2467	gi|340709090|ref|XP_003393147.1|	871	0	PREDICTED: cytosolic carboxypeptidase 1-like [Bombus terrestris]
CL2068.Contig2_CmRNA	3031	18	0.6776	gi|340709090|ref|XP_003393147.1|	875	0	PREDICTED: cytosolic carboxypeptidase 1-like [Bombus terrestris]
CL2070.Contig1_CmRNA	311	20	7.3381	gi|190702303|gb|ACE75199.1|	103	3e-21	conserved hypothetical protein [Glyptapanteles flavicoxis]
CL2073.Contig1_CmRNA	1717	137	9.1047	gi|340727324|ref|XP_003401996.1|	457	1e-127	PREDICTED: choline-phosphate cytidylyltransferase B-like isoform 1 [Bombus terrestris] >gi|340727326|ref|XP_003401997.1| PREDICTED: choline-phosphate cytidylyltransferase B-like isoform 2 [Bombus terrestris]
CL2073.Contig2_CmRNA	1694	71	4.7825	gi|307187371|gb|EFN72494.1|	460	1e-127	Choline-phosphate cytidylyltransferase B [Camponotus floridanus]
CL2078.Contig1_CmRNA	675	154	26.0334	gi|157132466|ref|XP_001662576.1|	177	3e-43	sodium-bile acid cotransporter [Aedes aegypti] >gi|108871160|gb|EAT35385.1| sodium-bile acid cotransporter [Aedes aegypti]
CL2079.Contig1_CmRNA	710	92	14.7857	gi|340721922|ref|XP_003399362.1|	322	1e-86	PREDICTED: niemann-Pick C1 protein-like [Bombus terrestris]
CL208.Contig1_CmRNA	885	2	0.2579	gi|157361545|gb|ABV44730.1|	86.3	2e-15	membrane-associated LPS-inducible TNF alpha factor protein-like protein [Phlebotomus papatasi]
CL208.Contig2_CmRNA	883	12	1.5507	gi|157361545|gb|ABV44730.1|	86.3	2e-15	membrane-associated LPS-inducible TNF alpha factor protein-like protein [Phlebotomus papatasi]
CL2080.Contig1_CmRNA	1116	170	17.3819	gi|284413718|ref|NP_001165114.1|	203	1e-50	collagen [Bombyx mori]
CL2080.Contig2_CmRNA	345	30	9.9224	gi|170571440|ref|XP_001891729.1|	76.3	4e-13	Calcium-binding protein [Brugia malayi]
CL2086.Contig1_CmRNA	461	47	11.6335	gi|158287252|ref|XP_309331.4|	84.7	1e-15	AGAP011319-PA [Anopheles gambiae str. PEST] >gi|157019562|gb|EAA05233.4| AGAP011319-PA [Anopheles gambiae str. PEST]
CL2086.Contig2_CmRNA	406	12	3.3726	gi|158287252|ref|XP_309331.4|	84.7	1e-15	AGAP011319-PA [Anopheles gambiae str. PEST] >gi|157019562|gb|EAA05233.4| AGAP011319-PA [Anopheles gambiae str. PEST]
CL2091.Contig1_CmRNA	1554	48	3.5246	gi|158288392|ref|XP_559490.5|	635	1e-180	AGAP003725-PA [Anopheles gambiae str. PEST]
CL2091.Contig2_CmRNA	1329	9	0.7727	gi|158288392|ref|XP_559490.5|	545	1e-153	AGAP003725-PA [Anopheles gambiae str. PEST]
CL2091.Contig3_CmRNA	1298	6	0.5275	gi|158288392|ref|XP_559490.5|	530	1e-149	AGAP003725-PA [Anopheles gambiae str. PEST]
CL2092.Contig1_CmRNA	251	7	3.1823	gi|195448180|ref|XP_002071545.1|	54.7	1e-06	GK25084 [Drosophila willistoni] >gi|194167630|gb|EDW82531.1| GK25084 [Drosophila willistoni]
CL2093.Contig1_CmRNA	3122	156779	5730.18	gi|4191598|gb|AAD09820.1|	1809	0	sarco(endo)plasmic reticulum-type calcium ATPase [Heliothis virescens]
CL2093.Contig2_CmRNA	213	23	12.3215	gi|345493530|ref|XP_001603571.2|	140	2e-32	PREDICTED: calcium-transporting ATPase sarcoplasmic/endoplasmic reticulum type-like [Nasonia vitripennis]
CL2093.Contig3_CmRNA	200	9	5.1348	gi|332020025|gb|EGI60476.1|	129	4e-29	Calcium-transporting ATPase sarcoplasmic/endoplasmic reticulum type [Acromyrmex echinatior]
CL2094.Contig1_CmRNA	535	20	4.2657	gi|170050069|ref|XP_001859178.1|	148	1e-34	transcription initiation factor TFIID subunit 10 [Culex quinquefasciatus] >gi|167871655|gb|EDS35038.1| transcription initiation factor TFIID subunit 10 [Culex quinquefasciatus]
CL2094.Contig2_CmRNA	461	15	3.7128	gi|170050069|ref|XP_001859178.1|	148	8e-35	transcription initiation factor TFIID subunit 10 [Culex quinquefasciatus] >gi|167871655|gb|EDS35038.1| transcription initiation factor TFIID subunit 10 [Culex quinquefasciatus]
CL2095.Contig1_CmRNA	1011	55	6.2076	gi|12585494|sp|Q9U0S4.1|VATD_MANSE	448	1e-124	RecName: Full=V-type proton ATPase subunit D; Short=V-ATPase subunit D; AltName: Full=Vacuolar proton pump subunit D >gi|6706298|emb|CAB65912.1| vacuolar ATPase subunit D [Manduca sexta]
CL2095.Contig2_CmRNA	895	76	9.6896	gi|12585494|sp|Q9U0S4.1|VATD_MANSE	441	1e-122	RecName: Full=V-type proton ATPase subunit D; Short=V-ATPase subunit D; AltName: Full=Vacuolar proton pump subunit D >gi|6706298|emb|CAB65912.1| vacuolar ATPase subunit D [Manduca sexta]
CL2095.Contig3_CmRNA	434	92	24.1887	gi|156542568|ref|XP_001600508.1|	255	5e-67	PREDICTED: V-type proton ATPase subunit D 1-like [Nasonia vitripennis]
CL2097.Contig1_CmRNA	945	37	4.4677	gi|91088005|ref|XP_973827.1|	292	1e-77	PREDICTED: similar to l-asparaginase [Tribolium castaneum]
CL2097.Contig2_CmRNA	799	16	2.285	gi|91088005|ref|XP_973827.1|	292	1e-77	PREDICTED: similar to l-asparaginase [Tribolium castaneum]
CL2098.Contig1_CmRNA	1323	133	11.4711	gi|164448642|ref|NP_001106734.1|	795	0	chromodomain-helicase-DNA-binding protein 1 [Bombyx mori] >gi|269969346|sp|A9X4T1.1|CHD1_BOMMO RecName: Full=Chromodomain-helicase-DNA-binding protein 1; Short=CHD-1; AltName: Full=ATP-dependent helicase CHD1 >gi|89213694|gb|ABD64154.1| CHD1 [Bombyx mori]
CL21.Contig1_CmRNA	950	406	48.7659	gi|298204323|gb|ADI61810.1|	393	1e-108	endonuclease-reverse transcriptase [Bombyx mori]
CL21.Contig2_CmRNA	297	71	27.2782	gi|298204323|gb|ADI61810.1|	89.7	6e-32	endonuclease-reverse transcriptase [Bombyx mori]
CL21.Contig3_CmRNA	1258	324	29.3885	gi|298204323|gb|ADI61810.1|	391	1e-107	endonuclease-reverse transcriptase [Bombyx mori]
CL21.Contig4_CmRNA	1730	550	36.2769	gi|298204323|gb|ADI61810.1|	479	1e-158	endonuclease-reverse transcriptase [Bombyx mori]
CL21.Contig5_CmRNA	1030	723	80.0967	gi|298204337|gb|ADI61817.1|	78.6	4e-13	endonuclease-reverse transcriptase [Bombyx mori]
CL21.Contig6_CmRNA	1345	479	40.6375	gi|257480037|gb|ACV60232.1|	523	1e-146	antennal esterase CXE5 [Spodoptera littoralis]
CL21.Contig7_CmRNA	849	270	36.2886	gi|298204337|gb|ADI61817.1|	95.9	2e-18	endonuclease-reverse transcriptase [Bombyx mori]
CL21.Contig8_CmRNA	541	271	57.1591	gi|298204337|gb|ADI61817.1|	95.9	8e-19	endonuclease-reverse transcriptase [Bombyx mori]
CL21.Contig9_CmRNA	958	370	44.0707	gi|298204337|gb|ADI61817.1|	95.9	2e-18	endonuclease-reverse transcriptase [Bombyx mori]
CL2101.Contig1_CmRNA	1098	479	49.7791	gi|307170116|gb|EFN62534.1|	421	1e-116	JmjC domain-containing histone demethylation protein 2B [Camponotus floridanus]
CL2102.Contig1_CmRNA	1134	153	15.3954	gi|189237116|ref|XP_001812356.1|	168	4e-40	PREDICTED: similar to lethal (2) k07433 CG33130-PA [Tribolium castaneum]
CL2105.Contig1_CmRNA	975	104	12.1715	gi|115760567|ref|XP_001179135.1|	243	1e-62	PREDICTED: similar to gag-pol polyprotein [Strongylocentrotus purpuratus] >gi|115961923|ref|XP_001196410.1| PREDICTED: similar to gag-pol polyprotein [Strongylocentrotus purpuratus]
CL2105.Contig2_CmRNA	280	6	2.4452	gi|7243250|dbj|BAA92690.1|	122	6e-27	pol polyprotein [Bombyx mori]
CL2106.Contig1_CmRNA	520	22	4.8276	gi|15290529|gb|AAK94897.1|AF281654_1	147	2e-34	mRNA cap-binding protein eIF4E [Spodoptera frugiperda]
CL2106.Contig2_CmRNA	450	4	1.0143	gi|15290529|gb|AAK94897.1|AF281654_1	147	1e-34	mRNA cap-binding protein eIF4E [Spodoptera frugiperda]
CL2111.Contig1_CmRNA	1284	4090	363.473	gi|156547253|ref|XP_001601340.1|	427	1e-118	PREDICTED: lambda-crystallin homolog [Nasonia vitripennis]
CL2113.Contig1_CmRNA	515	78	17.2823	gi|58385276|ref|XP_313828.2|	70.9	2e-11	AGAP004528-PA [Anopheles gambiae str. PEST] >gi|55240904|gb|EAA09295.2| AGAP004528-PA [Anopheles gambiae str. PEST]
CL2114.Contig1_CmRNA	849	177	23.7892	gi|332019834|gb|EGI60295.1|	260	6e-68	Serine/threonine-protein kinase Doa [Acromyrmex echinatior]
CL2114.Contig2_CmRNA	810	157	22.1171	gi|332019834|gb|EGI60295.1|	254	3e-66	Serine/threonine-protein kinase Doa [Acromyrmex echinatior]
CL2114.Contig3_CmRNA	681	158	26.4742	gi|332019834|gb|EGI60295.1|	226	8e-58	Serine/threonine-protein kinase Doa [Acromyrmex echinatior]
CL2114.Contig4_CmRNA	671	145	24.6581	gi|472913|emb|CAA55367.1|	223	5e-57	Doa kinase [Drosophila melanogaster]
CL2114.Contig5_CmRNA	532	149	31.9586	gi|189241909|ref|XP_970822.2|	216	5e-55	PREDICTED: similar to Darkener of apricot CG33553-PG [Tribolium castaneum]
CL2116.Contig1_CmRNA	535	58	12.3705	gi|270017090|gb|EFA13536.1|	78.6	1e-16	hypothetical protein TcasGA2_TC005054 [Tribolium castaneum]
CL2117.Contig1_CmRNA	469	15	3.6495	gi|332029042|gb|EGI69056.1|	241	9e-63	Protein unc-13-like protein D [Acromyrmex echinatior]
CL2117.Contig2_CmRNA	243	2	0.9392	gi|328780880|ref|XP_392488.4|	123	3e-27	PREDICTED: protein unc-13 homolog D [Apis mellifera]
CL2118.Contig1_CmRNA	433	81	21.3457	gi|300521735|gb|ADK26057.1|	73.2	3e-12	Kunitz-type protease inhibitor precursor [Galleria mellonella]
CL2119.Contig1_CmRNA	812	117	16.4416	gi|300873134|gb|ADK39311.1|	473	1e-132	heat shock protein 70 [Plutella xylostella]
CL2127.Contig1_CmRNA	924	5470	675.506	gi|186396|gb|AAA59163.1|	101	4e-20	mucin [Homo sapiens]
CL213.Contig1_CmRNA	1001	111	12.6533	gi|157128354|ref|XP_001661416.1|	393	1e-108	adducin [Aedes aegypti] >gi|108872625|gb|EAT36850.1| adducin [Aedes aegypti]
CL213.Contig2_CmRNA	262	11	4.7908	gi|158293046|ref|XP_001688561.1|	75.9	5e-13	AGAP004852-PB [Anopheles gambiae str. PEST] >gi|157016918|gb|EDO64038.1| AGAP004852-PB [Anopheles gambiae str. PEST]
CL2130.Contig1_CmRNA	545	34	7.1186	gi|156539774|ref|XP_001601808.1|	176	3e-43	PREDICTED: similar to pol polyprotein [Nasonia vitripennis]
CL2132.Contig1_CmRNA	888	90	11.5649	gi|156540435|ref|XP_001599720.1|	131	3e-29	PREDICTED: similar to ENSANGP00000022132 [Nasonia vitripennis]
CL2133.Contig1_CmRNA	1041	114	12.4959	gi|239792525|dbj|BAH72596.1|	124	7e-27	ACYPI004614 [Acyrthosiphon pisum]
CL2134.Contig1_CmRNA	366	4	1.2471	gi|195457070|ref|XP_002075412.1|	89	6e-17	GK15277 [Drosophila willistoni] >gi|194171497|gb|EDW86398.1| GK15277 [Drosophila willistoni]
CL2134.Contig2_CmRNA	306	12	4.4748	gi|195041346|ref|XP_001991236.1|	94.7	1e-18	GH12549 [Drosophila grimshawi] >gi|193900994|gb|EDV99860.1| GH12549 [Drosophila grimshawi]
CL2135.Contig1_CmRNA	1025	163	18.1459	gi|333470537|gb|EGK97658.1|	197	7e-49	AGAP001141-PB [Anopheles gambiae str. PEST]
CL2136.Contig1_CmRNA	538	44	9.3322	gi|114051978|ref|NP_001040199.1|	196	4e-49	macrophage migration inhibitory factor [Bombyx mori] >gi|87248353|gb|ABD36229.1| macrophage migration inhibitory factor [Bombyx mori]
CL2136.Contig2_CmRNA	430	2	0.5307	gi|114051978|ref|NP_001040199.1|	196	3e-49	macrophage migration inhibitory factor [Bombyx mori] >gi|87248353|gb|ABD36229.1| macrophage migration inhibitory factor [Bombyx mori]
CL2137.Contig1_CmRNA	338	15	5.0639	gi|156100505|ref|XP_001615980.1|	93.2	3e-18	KS1 protein precursor [Plasmodium vivax SaI-1]
CL214.Contig1_CmRNA	2031	439	24.6643	gi|66808577|ref|XP_638011.1|	65.5	1e-08	replication factor C subunit [Dictyostelium discoideum AX4] >gi|74853625|sp|Q54MH9.1|RFC1_DICDI RecName: Full=Probable replication factor C subunit 1; AltName: Full=Activator 1 subunit 1 >gi|60466460|gb|EAL64515.1| replication factor C subunit [Dictyostelium discoideum AX4]
CL2141.Contig1_CmRNA	517	27	5.9592	gi|307168966|gb|EFN61852.1|	109	4e-23	Cytosolic carboxypeptidase 1 [Camponotus floridanus]
CL2141.Contig2_CmRNA	475	35	8.4079	gi|340709090|ref|XP_003393147.1|	110	3e-23	PREDICTED: cytosolic carboxypeptidase 1-like [Bombus terrestris]
CL2142.Contig1_CmRNA	984	59	6.8418	gi|195351816|ref|XP_002042424.1|	154	5e-36	GM23345 [Drosophila sechellia] >gi|194124293|gb|EDW46336.1| GM23345 [Drosophila sechellia]
CL2142.Contig2_CmRNA	773	9	1.3285	gi|195351816|ref|XP_002042424.1|	140	4e-32	GM23345 [Drosophila sechellia] >gi|194124293|gb|EDW46336.1| GM23345 [Drosophila sechellia]
CL2143.Contig1_CmRNA	1273	17	1.5238	gi|157115823|ref|XP_001658299.1|	511	1e-143	sterol o-acyltransferase [Aedes aegypti] >gi|108883469|gb|EAT47694.1| sterol o-acyltransferase [Aedes aegypti]
CL2143.Contig2_CmRNA	1246	20	1.8316	gi|157115823|ref|XP_001658299.1|	509	1e-142	sterol o-acyltransferase [Aedes aegypti] >gi|108883469|gb|EAT47694.1| sterol o-acyltransferase [Aedes aegypti]
CL2149.Contig1_CmRNA	2622	49	2.1324	gi|91094211|ref|XP_972733.1|	526	1e-147	PREDICTED: similar to CG7029 CG7029-PC [Tribolium castaneum]
CL2149.Contig2_CmRNA	2526	18	0.8131	gi|91094211|ref|XP_972733.1|	527	1e-148	PREDICTED: similar to CG7029 CG7029-PC [Tribolium castaneum]
CL2149.Contig3_CmRNA	1766	15	0.9692	gi|91094211|ref|XP_972733.1|	426	1e-117	PREDICTED: similar to CG7029 CG7029-PC [Tribolium castaneum]
CL215.Contig1_CmRNA	863	117	15.4699	gi|195377377|ref|XP_002047467.1|	254	3e-66	GJ13461 [Drosophila virilis] >gi|194154625|gb|EDW69809.1| GJ13461 [Drosophila virilis]
CL215.Contig2_CmRNA	459	8	1.9888	gi|195377377|ref|XP_002047467.1|	137	1e-31	GJ13461 [Drosophila virilis] >gi|194154625|gb|EDW69809.1| GJ13461 [Drosophila virilis]
CL2150.Contig1_CmRNA	812	46	6.4642	gi|148298833|ref|NP_001091765.1|	147	4e-34	NADP-dependent oxidoreductase [Bombyx mori] >gi|95102972|gb|ABF51427.1| NADP-dependent oxidoreductase [Bombyx mori]
CL2150.Contig2_CmRNA	789	25	3.6156	gi|148298833|ref|NP_001091765.1|	147	4e-34	NADP-dependent oxidoreductase [Bombyx mori] >gi|95102972|gb|ABF51427.1| NADP-dependent oxidoreductase [Bombyx mori]
CL2150.Contig3_CmRNA	1329	720	61.8189	gi|148298833|ref|NP_001091765.1|	539	1e-151	NADP-dependent oxidoreductase [Bombyx mori] >gi|95102972|gb|ABF51427.1| NADP-dependent oxidoreductase [Bombyx mori]
CL2154.Contig1_CmRNA	1044	48	5.2463	gi|91076084|ref|XP_967873.1|	366	1e-99	PREDICTED: similar to AGAP008596-PA [Tribolium castaneum]
CL2154.Contig2_CmRNA	1701	454	30.4555	gi|91076084|ref|XP_967873.1|	593	1e-168	PREDICTED: similar to AGAP008596-PA [Tribolium castaneum]
CL2155.Contig1_CmRNA	1743	84	5.4991	gi|195117722|ref|XP_002003396.1|	316	2e-84	GI17890 [Drosophila mojavensis] >gi|193913971|gb|EDW12838.1| GI17890 [Drosophila mojavensis]
CL2155.Contig2_CmRNA	1663	82	5.6265	gi|195117722|ref|XP_002003396.1|	316	2e-84	GI17890 [Drosophila mojavensis] >gi|193913971|gb|EDW12838.1| GI17890 [Drosophila mojavensis]
CL2158.Contig1_CmRNA	400	24	6.8464	gi|319894762|gb|ADV76536.1|	165	6e-40	ATP-binding cassette sub-family B member 1 [Trichoplusia ni]
CL216.Contig1_CmRNA	697	73	11.951	gi|156541498|ref|XP_001601228.1|	85.5	2e-15	PREDICTED: similar to pol-like protein [Nasonia vitripennis]
CL2162.Contig1_CmRNA	785	146	21.2225	gi|310770178|gb|ADP21587.1|	374	1e-102	fatty-acyl CoA Z/E11-desaturase [Yponomeuta evonymellus]
CL2162.Contig2_CmRNA	547	5	1.043	gi|169798406|gb|ACA81687.1|	224	1e-57	acyl-CoA delta-11 desaturase [Ostrinia nubilalis] >gi|169798408|gb|ACA81688.1| acyl-CoA delta-11 desaturase [Ostrinia nubilalis] >gi|294517566|gb|ADE97413.1| acyl-CoA delta-11 desaturase [Ostrinia nubilalis]
CL2163.Contig1_CmRNA	475	11	2.6425	gi|332021581|gb|EGI61946.1|	320	1e-86	NEDD8-conjugating enzyme Ubc12 [Acromyrmex echinatior]
CL2163.Contig2_CmRNA	391	1	0.2918	gi|307214126|gb|EFN89290.1|	249	3e-65	NEDD8-conjugating enzyme Ubc12 [Harpegnathos saltator]
CL2164.Contig1_CmRNA	1841	13335	826.519	gi|91083623|ref|XP_970124.1|	779	0	PREDICTED: similar to citrate synthase [Tribolium castaneum]
CL2164.Contig2_CmRNA	593	171	32.9045	gi|307202019|gb|EFN81583.1|	380	1e-104	Probable citrate synthase 1, mitochondrial [Harpegnathos saltator]
CL2168.Contig1_CmRNA	670	56	9.5373	gi|314906996|gb|ABK29496.2|	251	2e-65	nuclear transport factor 2 [Helicoverpa armigera]
CL2168.Contig2_CmRNA	659	171	29.609	gi|314906996|gb|ABK29496.2|	251	2e-65	nuclear transport factor 2 [Helicoverpa armigera]
CL2170.Contig1_CmRNA	931	561	68.7586	gi|221768562|gb|ACM40881.1|	65.5	3e-09	laminin-like secreted salivary protein [Culicoides nubeculosus]
CL2172.Contig1_CmRNA	583	55	10.7648	gi|195117826|ref|XP_002003448.1|	102	1e-20	GI22475 [Drosophila mojavensis] >gi|193914023|gb|EDW12890.1| GI22475 [Drosophila mojavensis]
CL2174.Contig1_CmRNA	868	40	5.2584	gi|189239335|ref|XP_973573.2|	328	1e-88	PREDICTED: similar to pasilla CG16765-PK [Tribolium castaneum]
CL2174.Contig2_CmRNA	529	4	0.8628	gi|189239335|ref|XP_973573.2|	260	2e-68	PREDICTED: similar to pasilla CG16765-PK [Tribolium castaneum]
CL2176.Contig1_CmRNA	941	119	14.4302	gi|66523982|ref|XP_393981.2|	358	1e-97	PREDICTED: transformation/transcription domain-associated protein isoform 1 [Apis mellifera]
CL2178.Contig1_CmRNA	554	7	1.4418	gi|238664621|emb|CAZ35443.1|	55.5	1e-06	expressed protein [Schistosoma mansoni]
CL2178.Contig2_CmRNA	602	30	5.6864	gi|238664621|emb|CAZ35443.1|	61.2	3e-08	expressed protein [Schistosoma mansoni]
CL2181.Contig1_CmRNA	516	612	135.337	gi|13810820|gb|AAK40037.1|	75.5	9e-13	silk protease inhibitor 1 precursor [Galleria mellonella]
CL2186.Contig1_CmRNA	725	137	21.5624	gi|5869985|emb|CAB55603.1|	55.8	2e-06	moderately methionine rich storage protein [Spodoptera litura]
CL2187.Contig1_CmRNA	1255	1	0.0909	gi|114053119|ref|NP_001040533.1|	495	1e-138	chloride intracellular channel isoform 1 [Bombyx mori] >gi|95102944|gb|ABF51413.1| chloride intracellular channel isoform 1 [Bombyx mori]
CL2187.Contig2_CmRNA	1232	23	2.1303	gi|114053119|ref|NP_001040533.1|	495	1e-138	chloride intracellular channel isoform 1 [Bombyx mori] >gi|95102944|gb|ABF51413.1| chloride intracellular channel isoform 1 [Bombyx mori]
CL2187.Contig3_CmRNA	1189	0	0	gi|114053119|ref|NP_001040533.1|	508	1e-142	chloride intracellular channel isoform 1 [Bombyx mori] >gi|95102944|gb|ABF51413.1| chloride intracellular channel isoform 1 [Bombyx mori]
CL2187.Contig4_CmRNA	1166	3	0.2936	gi|114053119|ref|NP_001040533.1|	508	1e-142	chloride intracellular channel isoform 1 [Bombyx mori] >gi|95102944|gb|ABF51413.1| chloride intracellular channel isoform 1 [Bombyx mori]
CL2188.Contig2_CmRNA	986	159	18.4007	gi|160333368|ref|NP_001103822.1|	305	2e-81	ociad protein isoform 2 [Bombyx mori] >gi|95102820|gb|ABF51351.1| ociad protein isoform 2 [Bombyx mori] >gi|95103066|gb|ABF51474.1| OCIA domain containing protein 2 [Bombyx mori]
CL219.Contig1_CmRNA	1364	14	1.1712	gi|332022067|gb|EGI62392.1|	345	4e-93	Techylectin-5B [Acromyrmex echinatior]
CL219.Contig2_CmRNA	1254	9	0.819	gi|332022067|gb|EGI62392.1|	110	2e-22	Techylectin-5B [Acromyrmex echinatior]
CL219.Contig3_CmRNA	600	28	5.325	gi|332022067|gb|EGI62392.1|	403	1e-111	Techylectin-5B [Acromyrmex echinatior]
CL219.Contig4_CmRNA	490	6	1.3972	gi|332022067|gb|EGI62392.1|	168	7e-41	Techylectin-5B [Acromyrmex echinatior]
CL2191.Contig1_CmRNA	644	25	4.4296	gi|307197735|gb|EFN78884.1|	81.3	3e-14	Pre-mRNA cleavage complex 2 protein Pcf11 [Harpegnathos saltator]
CL2191.Contig2_CmRNA	578	12	2.369	gi|307197735|gb|EFN78884.1|	151	1e-35	Pre-mRNA cleavage complex 2 protein Pcf11 [Harpegnathos saltator]
CL2193.Contig1_CmRNA	670	23	3.9171	gi|195392800|ref|XP_002055042.1|	102	2e-20	GJ19159 [Drosophila virilis] >gi|194149552|gb|EDW65243.1| GJ19159 [Drosophila virilis]
CL2193.Contig2_CmRNA	515	44	9.749	gi|195392800|ref|XP_002055042.1|	102	9e-21	GJ19159 [Drosophila virilis] >gi|194149552|gb|EDW65243.1| GJ19159 [Drosophila virilis]
CL2197.Contig1_CmRNA	486	1044	245.119	gi|345480859|ref|XP_003424230.1|	179	5e-44	PREDICTED: 40S ribosomal protein S27-like [Nasonia vitripennis]
CL2200.Contig1_CmRNA	1242	296	27.1947	gi|345486884|ref|XP_001607482.2|	152	2e-35	PREDICTED: hepatocyte growth factor-regulated tyrosine kinase substrate-like [Nasonia vitripennis]
CL2205.Contig1_CmRNA	1630	658	46.063	gi|323505963|gb|ADX87345.1|	763	0	yellow-b [Heliconius melpomene]
CL2209.Contig1_CmRNA	483	6	1.4175	gi|270004888|gb|EFA01336.1|	246	2e-64	iroquois-like protein [Tribolium castaneum]
CL2209.Contig2_CmRNA	434	0	0	gi|270004888|gb|EFA01336.1|	199	3e-50	iroquois-like protein [Tribolium castaneum]
CL221.Contig1_CmRNA	875	117	15.2578	gi|195470439|ref|XP_002087514.1|	83.2	1e-14	GE17396 [Drosophila yakuba] >gi|194173615|gb|EDW87226.1| GE17396 [Drosophila yakuba]
CL2211.Contig1_CmRNA	367	3326	1034.12	gi|183234548|ref|XP_001914036.1|	65.9	5e-10	serine-rich protein C30B4.01c precursor [Entamoeba histolytica HM-1:IMSS]
CL2213.Contig1_CmRNA	1391	5329	437.152	gi|112982822|ref|NP_001037540.1|	490	1e-137	phosphoglyceromutase [Bombyx mori] >gi|74229869|gb|ABA00463.1| phosphoglyceromutase [Bombyx mori]
CL2214.Contig1_CmRNA	1577	39	2.8219	gi|84095074|dbj|BAE66652.1|	832	0	phenylalanine hydroxylase [Papilio xuthus]
CL2214.Contig2_CmRNA	1510	89	6.7255	gi|84095074|dbj|BAE66652.1|	851	0	phenylalanine hydroxylase [Papilio xuthus]
CL2217.Contig1_CmRNA	1877	1783	108.393	gi|5678609|emb|CAA08918.2|	729	0	dimethylallyltransferase [Agrotis ipsilon]
CL222.Contig1_CmRNA	878	130	16.8952	gi|301609273|ref|XP_002934194.1|	69.7	2e-24	PREDICTED: uncharacterized protein K02A2.6-like [Xenopus (Silurana) tropicalis]
CL222.Contig2_CmRNA	394	10	2.8961	gi|291227761|ref|XP_002733851.1|	73.6	3e-12	PREDICTED: RETRotransposon-like family member (retr-1)-like [Saccoglossus kowalevskii]
CL2225.Contig1_CmRNA	3199	605	21.5802	gi|33327733|gb|AAQ09229.1|	250	4e-64	polyprotein [Antheraea mylitta]
CL2228.Contig1_CmRNA	1572	777	56.4004	gi|122920502|pdb|2I1J|A	900	0	Chain A, Moesin From Spodoptera Frugiperda At 2.1 Angstroms Resolution >gi|122920505|pdb|2I1K|A Chain A, Moesin From Spodoptera Frugiperda Reveals The Coiled-Coil Domain At 3.0 Angstrom Resolution >gi|118133213|gb|ABK60307.1| moesin [Spodoptera frugiperda]
CL2229.Contig1_CmRNA	699	1518	247.804	gi|12751191|gb|AAK07569.1|AF316897_1	111	2e-23	JH-inducible protein [Galleria mellonella]
CL223.Contig1_CmRNA	241	38	17.992	gi|290563445|ref|NP_001166691.1|	87.8	1e-16	cuticular protein RR-2 motif 67 [Bombyx mori]
CL2230.Contig1_CmRNA	908	946	118.883	gi|58376764|ref|XP_308839.2|	238	2e-61	AGAP006918-PA [Anopheles gambiae str. PEST] >gi|55245924|gb|EAA04092.2| AGAP006918-PA [Anopheles gambiae str. PEST]
CL2231.Contig1_CmRNA	900	50	6.3393	gi|114052422|ref|NP_001040128.1|	339	9e-92	glucosamine-6-phosphate N-acetyltransferase [Bombyx mori] >gi|87248141|gb|ABD36123.1| glucosamine-6-phosphate N-acetyltransferase [Bombyx mori]
CL2231.Contig2_CmRNA	999	63	7.196	gi|114052422|ref|NP_001040128.1|	339	1e-91	glucosamine-6-phosphate N-acetyltransferase [Bombyx mori] >gi|87248141|gb|ABD36123.1| glucosamine-6-phosphate N-acetyltransferase [Bombyx mori]
CL2236.Contig1_CmRNA	1127	42	4.2524	gi|156536913|ref|XP_001607759.1|	221	4e-56	PREDICTED: probable lipid phosphate phosphatase PPAPDC3-like [Nasonia vitripennis]
CL2236.Contig2_CmRNA	1039	9	0.9884	gi|156536913|ref|XP_001607759.1|	221	3e-56	PREDICTED: probable lipid phosphate phosphatase PPAPDC3-like [Nasonia vitripennis]
CL224.Contig1_CmRNA	585	157	30.6237	gi|39655053|gb|AAR29602.1|	95.9	9e-19	pattern recognition serine proteinase precursor [Manduca sexta]
CL2241.Contig1_CmRNA	820	4	0.5566	gi|114051630|ref|NP_001040167.1|	290	4e-77	acid phosphatase isoenzyme [Bombyx mori] >gi|87248263|gb|ABD36184.1| acid phosphatase isoenzyme [Bombyx mori]
CL2241.Contig2_CmRNA	801	0	0	gi|114051630|ref|NP_001040167.1|	290	4e-77	acid phosphatase isoenzyme [Bombyx mori] >gi|87248263|gb|ABD36184.1| acid phosphatase isoenzyme [Bombyx mori]
CL2241.Contig3_CmRNA	571	0	0	gi|114051630|ref|NP_001040167.1|	151	1e-35	acid phosphatase isoenzyme [Bombyx mori] >gi|87248263|gb|ABD36184.1| acid phosphatase isoenzyme [Bombyx mori]
CL2241.Contig4_CmRNA	552	0	0	gi|114051630|ref|NP_001040167.1|	151	1e-35	acid phosphatase isoenzyme [Bombyx mori] >gi|87248263|gb|ABD36184.1| acid phosphatase isoenzyme [Bombyx mori]
CL2243.Contig1_CmRNA	797	238	34.0747	gi|307203836|gb|EFN82772.1|	530	1e-149	Vacuolar ATP synthase subunit B [Harpegnathos saltator]
CL2244.Contig1_CmRNA	2028	0	0	gi|345498074|ref|XP_001600608.2|	852	0	PREDICTED: kinesin light chain-like [Nasonia vitripennis]
CL2244.Contig2_CmRNA	1938	3	0.1766	gi|345498074|ref|XP_001600608.2|	839	0	PREDICTED: kinesin light chain-like [Nasonia vitripennis]
CL2244.Contig3_CmRNA	1870	1	0.061	gi|345498072|ref|XP_003428139.1|	844	0	PREDICTED: kinesin light chain-like [Nasonia vitripennis]
CL2244.Contig4_CmRNA	1780	29	1.8591	gi|345498074|ref|XP_001600608.2|	820	0	PREDICTED: kinesin light chain-like [Nasonia vitripennis]
CL2248.Contig1_CmRNA	1926	500	29.6229	gi|195475978|ref|XP_002090259.1|	139	4e-31	GE12891 [Drosophila yakuba] >gi|33328891|gb|AAQ09852.1| CG9259 [Drosophila yakuba] >gi|194176360|gb|EDW89971.1| GE12891 [Drosophila yakuba]
CL2252.Contig1_CmRNA	3767	367	11.1169	gi|307200815|gb|EFN80868.1|	2080	0	Collagen alpha-1(IV) chain [Harpegnathos saltator]
CL2252.Contig2_CmRNA	3371	13	0.44	gi|307200815|gb|EFN80868.1|	1477	0	Collagen alpha-1(IV) chain [Harpegnathos saltator]
CL2253.Contig1_CmRNA	490	93	21.6571	gi|340727777|ref|XP_003402212.1|	112	6e-24	PREDICTED: ribonuclease P protein subunit p20-like [Bombus terrestris]
CL2254.Contig1_CmRNA	271	23	9.6844	gi|162462371|ref|NP_001104817.1|	137	2e-31	hemocytin precursor [Bombyx mori] >gi|1346296|sp|P98092.1|HMCT_BOMMO RecName: Full=Hemocytin; AltName: Full=Humoral lectin; Flags: Precursor >gi|664884|dbj|BAA06160.1| humoral lectin prepropeptide [Bombyx mori] >gi|1094393|prf||2106140A hemocytin
CL2254.Contig2_CmRNA	205	0	0	gi|162462371|ref|NP_001104817.1|	68.6	8e-11	hemocytin precursor [Bombyx mori] >gi|1346296|sp|P98092.1|HMCT_BOMMO RecName: Full=Hemocytin; AltName: Full=Humoral lectin; Flags: Precursor >gi|664884|dbj|BAA06160.1| humoral lectin prepropeptide [Bombyx mori] >gi|1094393|prf||2106140A hemocytin
CL2257.Contig1_CmRNA	557	51	10.4479	gi|56462284|gb|AAV91425.1|	136	5e-31	protease inhibitor 3 [Lonomia obliqua]
CL2261.Contig1_CmRNA	1575	907	65.7113	gi|117970179|dbj|BAF36819.1|	389	1e-106	pxPhosphoserine phosphatase [Plutella xylostella]
CL2263.Contig1_CmRNA	557	411	84.1977	gi|299930677|gb|ADJ58554.1|	81.6	2e-14	seminal fluid protein HACP006 [Heliconius melpomene]
CL2263.Contig2_CmRNA	542	240	50.5272	gi|299930677|gb|ADJ58554.1|	84.7	2e-15	seminal fluid protein HACP006 [Heliconius melpomene]
CL2264.Contig1_CmRNA	1019	71	7.9506	gi|307213191|gb|EFN88688.1|	437	1e-121	RNA-binding protein Nova-1 [Harpegnathos saltator]
CL2264.Contig2_CmRNA	888	9	1.1565	gi|307213191|gb|EFN88688.1|	530	1e-149	RNA-binding protein Nova-1 [Harpegnathos saltator]
CL2267.Contig1_CmRNA	1282	138	12.283	gi|189234141|ref|XP_970358.2|	526	1e-148	PREDICTED: similar to CG7470 CG7470-PA [Tribolium castaneum]
CL2267.Contig2_CmRNA	1230	45	4.1747	gi|189234141|ref|XP_970358.2|	526	1e-148	PREDICTED: similar to CG7470 CG7470-PA [Tribolium castaneum]
CL2268.Contig1_CmRNA	615	38	7.0505	gi|326922826|ref|XP_003207645.1|	116	8e-25	PREDICTED: tetratricopeptide repeat protein 21B-like [Meleagris gallopavo]
CL2268.Contig2_CmRNA	514	2	0.444	gi|327277938|ref|XP_003223720.1|	62.8	6e-09	PREDICTED: tetratricopeptide repeat protein 21B-like [Anolis carolinensis]
CL2269.Contig1_CmRNA	1374	60	4.9829	gi|221091562|ref|XP_002158364.1|	55.8	5e-06	PREDICTED: similar to THAP domain containing, apoptosis associated protein 2, partial [Hydra magnipapillata]
CL2269.Contig2_CmRNA	1144	49	4.8875	gi|225717868|gb|ACO14780.1|	68.2	7e-10	THAP domain-containing protein 2 [Caligus clemensi]
CL2274.Contig1_CmRNA	3094	2999	110.604	gi|91082539|ref|XP_973726.1|	437	1e-120	PREDICTED: similar to inter-alpha (globulin) inhibitor H4 (plasma Kallikrein-sensitive glycoprotein) [Tribolium castaneum]
CL2275.Contig1_CmRNA	1057	298	32.1703	gi|190702197|gb|ACE75095.1|	91.7	5e-17	P325-like protein [Glyptapanteles flavicoxis]
CL2275.Contig2_CmRNA	420	20	5.4337	gi|117935390|gb|ABK57015.1|	79	6e-14	hypothetical protein GIP_L1_00290 [Glyptapanteles indiensis]
CL2278.Contig1_CmRNA	656	12	2.0873	gi|115747684|ref|XP_001190879.1|	268	2e-70	PREDICTED: similar to Tatdn1 protein, partial [Strongylocentrotus purpuratus] >gi|115918218|ref|XP_785614.2| PREDICTED: similar to Tatdn1 protein, partial [Strongylocentrotus purpuratus]
CL2278.Contig2_CmRNA	617	8	1.4795	gi|115747684|ref|XP_001190879.1|	198	1e-60	PREDICTED: similar to Tatdn1 protein, partial [Strongylocentrotus purpuratus] >gi|115918218|ref|XP_785614.2| PREDICTED: similar to Tatdn1 protein, partial [Strongylocentrotus purpuratus]
CL2279.Contig1_CmRNA	683	35	5.8474	gi|158289517|ref|XP_559330.3|	63.2	9e-09	AGAP000695-PA [Anopheles gambiae str. PEST] >gi|157018554|gb|EAL41112.3| AGAP000695-PA [Anopheles gambiae str. PEST]
CL2279.Contig2_CmRNA	636	1	0.1794	gi|158289517|ref|XP_559330.3|	63.2	8e-09	AGAP000695-PA [Anopheles gambiae str. PEST] >gi|157018554|gb|EAL41112.3| AGAP000695-PA [Anopheles gambiae str. PEST]
CL2284.Contig1_CmRNA	200	4	2.2821	gi|298204325|gb|ADI61811.1|	60.8	1e-08	endonuclease-reverse transcriptase [Bombyx mori]
CL2289.Contig1_CmRNA	923	262	32.3902	gi|118777128|ref|XP_307544.3|	102	2e-20	Anopheles gambiae str. PEST AGAP012644-PA [Anopheles gambiae str. PEST] >gi|116133037|gb|EAA03337.3| AGAP012644-PA [Anopheles gambiae str. PEST]
CL2297.Contig1_CmRNA	1431	141	11.2433	gi|114051866|ref|NP_001040134.1|	771	0	isocitrate dehydrogenase [Bombyx mori] >gi|87248167|gb|ABD36136.1| isocitrate dehydrogenase [Bombyx mori]
CL2297.Contig2_CmRNA	1431	261	20.812	gi|114051866|ref|NP_001040134.1|	771	0	isocitrate dehydrogenase [Bombyx mori] >gi|87248167|gb|ABD36136.1| isocitrate dehydrogenase [Bombyx mori]
CL2299.Contig1_CmRNA	741	464	71.4518	gi|326371147|gb|ADZ56942.1|	325	9e-88	ATP-binding cassette transporter subfamily G [Bombyx mori]
CL2299.Contig2_CmRNA	729	83	12.9916	gi|326371147|gb|ADZ56942.1|	341	2e-92	ATP-binding cassette transporter subfamily G [Bombyx mori]
CL230.Contig1_CmRNA	887	84	10.8061	gi|340720185|ref|XP_003398522.1|	587	1e-166	PREDICTED: 2-oxoglutarate dehydrogenase, mitochondrial-like [Bombus terrestris]
CL230.Contig2_CmRNA	435	27	7.0825	gi|189237141|ref|XP_973425.2|	83.6	6e-26	PREDICTED: similar to 2-oxoglutarate dehydrogenase [Tribolium castaneum]
CL2300.Contig1_CmRNA	1085	383	40.2794	gi|158297979|ref|XP_001231096.2|	109	3e-22	AGAP004734-PA [Anopheles gambiae str. PEST] >gi|157014587|gb|EAU76230.2| AGAP004734-PA [Anopheles gambiae str. PEST]
CL2307.Contig1_CmRNA	961	95	11.2801	gi|322789231|gb|EFZ14584.1|	73.2	2e-11	hypothetical protein SINV_15477 [Solenopsis invicta]
CL2309.Contig1_CmRNA	520	0	0	gi|328710859|ref|XP_003244382.1|	112	9e-24	PREDICTED: zinc finger protein 91-like [Acyrthosiphon pisum]
CL2309.Contig2_CmRNA	519	5	1.0993	gi|328710859|ref|XP_003244382.1|	112	9e-24	PREDICTED: zinc finger protein 91-like [Acyrthosiphon pisum]
CL2310.Contig1_CmRNA	1283	229	20.3668	gi|340713138|ref|XP_003395105.1|	419	1e-115	PREDICTED: protein lap4-like isoform 1 [Bombus terrestris] >gi|340713140|ref|XP_003395106.1| PREDICTED: protein lap4-like isoform 2 [Bombus terrestris] >gi|340713144|ref|XP_003395108.1| PREDICTED: protein lap4-like isoform 4 [Bombus terrestris]
CL2310.Contig2_CmRNA	413	2	0.5526	gi|345489480|ref|XP_001603194.2|	100	1e-20	PREDICTED: protein lap4-like [Nasonia vitripennis]
CL2316.Contig1_CmRNA	976	87	10.1715	gi|195054543|ref|XP_001994184.1|	164	7e-39	GH14857 [Drosophila grimshawi] >gi|193896054|gb|EDV94920.1| GH14857 [Drosophila grimshawi]
CL2316.Contig2_CmRNA	279	7	2.8629	gi|332025921|gb|EGI66077.1|	59.7	4e-08	Putative nucleoporin Nup58 [Acromyrmex echinatior]
CL232.Contig1_CmRNA	782	206	30.059	gi|56283929|ref|NP_523475.3|	61.2	5e-08	salivary gland secretion 1 [Drosophila melanogaster] >gi|55380421|gb|AAF50957.4| salivary gland secretion 1 [Drosophila melanogaster]
CL2324.Contig1_CmRNA	349	2	0.6539	gi|298204323|gb|ADI61810.1|	206	3e-52	endonuclease-reverse transcriptase [Bombyx mori]
CL2324.Contig2_CmRNA	285	17	6.8064	gi|298204337|gb|ADI61817.1|	72	7e-12	endonuclease-reverse transcriptase [Bombyx mori]
CL2324.Contig3_CmRNA	541	10	2.1092	gi|298204323|gb|ADI61810.1|	187	3e-46	endonuclease-reverse transcriptase [Bombyx mori]
CL2325.Contig1_CmRNA	1765	16611	1073.9	gi|18253047|gb|AAL62468.1|	840	0	ribosomal protein L3 [Spodoptera frugiperda]
CL2325.Contig2_CmRNA	1180	3808	368.238	gi|340724650|ref|XP_003400694.1|	726	0	PREDICTED: 60S ribosomal protein L3-like [Bombus terrestris]
CL2326.Contig1_CmRNA	552	8	1.6537	gi|305430487|gb|ADM53096.1|	160	3e-38	prophenoloxidase [Pieris rapae]
CL2326.Contig2_CmRNA	534	5	1.0684	gi|305430487|gb|ADM53096.1|	160	3e-38	prophenoloxidase [Pieris rapae]
CL2327.Contig2_CmRNA	286	5	1.9949	gi|195454807|ref|XP_002074414.1|	74.3	1e-12	GK10589 [Drosophila willistoni] >gi|194170499|gb|EDW85400.1| GK10589 [Drosophila willistoni]
CL2329.Contig1_CmRNA	514	36	7.992	gi|307186399|gb|EFN72033.1|	243	3e-63	Phosphatase and actin regulator 1 [Camponotus floridanus]
CL2329.Contig2_CmRNA	339	1	0.3366	gi|158286799|ref|XP_308934.4|	179	4e-44	AGAP006812-PA [Anopheles gambiae str. PEST] >gi|157020640|gb|EAA04197.5| AGAP006812-PA [Anopheles gambiae str. PEST]
CL2333.Contig1_CmRNA	1136	124	12.4554	gi|114051804|ref|NP_001040182.1|	342	1e-92	high-affinity copper uptake protein 1 [Bombyx mori] >gi|87248305|gb|ABD36205.1| high-affinity copper uptake protein 1 [Bombyx mori]
CL2333.Contig2_CmRNA	990	23	2.651	gi|114051804|ref|NP_001040182.1|	324	4e-87	high-affinity copper uptake protein 1 [Bombyx mori] >gi|87248305|gb|ABD36205.1| high-affinity copper uptake protein 1 [Bombyx mori]
CL2335.Contig1_CmRNA	2125	498	26.7414	gi|167077413|gb|ABZ10939.1|	1160	0	heat shock protein 70 [Sesamia nonagrioides]
CL2335.Contig2_CmRNA	530	113	24.3285	gi|336454474|gb|AEI58996.1|	347	2e-94	heat shock protein 70B [Bombyx mori]
CL2338.Contig1_CmRNA	311	14	5.1367	gi|237648968|ref|NP_001153661.1|	72	7e-12	aquaporin [Bombyx mori] >gi|225320705|dbj|BAH29748.1| aquaporin AQP-Bom3 [Bombyx mori]
CL2338.Contig2_CmRNA	263	7	3.0371	gi|237648968|ref|NP_001153661.1|	72	7e-12	aquaporin [Bombyx mori] >gi|225320705|dbj|BAH29748.1| aquaporin AQP-Bom3 [Bombyx mori]
CL2341.Contig1_CmRNA	477	85	20.3336	gi|340714263|ref|XP_003395650.1|	113	2e-24	PREDICTED: ubiquitin-NEDD8-like protein RUB1-like [Bombus terrestris]
CL2341.Contig2_CmRNA	258	4	1.7691	gi|340714263|ref|XP_003395650.1|	96.3	4e-19	PREDICTED: ubiquitin-NEDD8-like protein RUB1-like [Bombus terrestris]
CL2342.Contig1_CmRNA	934	64	7.8189	gi|307213767|gb|EFN89105.1|	382	1e-104	Protein VPRBP [Harpegnathos saltator]
CL2342.Contig2_CmRNA	799	10	1.4281	gi|307213767|gb|EFN89105.1|	336	8e-91	Protein VPRBP [Harpegnathos saltator]
CL2343.Contig1_CmRNA	1222	988	92.257	gi|195446358|ref|XP_002070743.1|	127	8e-28	GK10857 [Drosophila willistoni] >gi|194166828|gb|EDW81729.1| GK10857 [Drosophila willistoni]
CL2344.Contig1_CmRNA	525	20	4.3469	gi|154332073|ref|XP_001561853.1|	55.8	8e-07	microtubule-associated protein [Leishmania braziliensis MHOM/BR/75/M2904]
CL2344.Contig2_CmRNA	510	12	2.6849	gi|154332073|ref|XP_001561853.1|	53.9	3e-06	microtubule-associated protein [Leishmania braziliensis MHOM/BR/75/M2904]
CL2345.Contig1_CmRNA	402	24	6.8124	gi|158299588|ref|XP_319685.4|	118	7e-26	AGAP008931-PA [Anopheles gambiae str. PEST] >gi|157013589|gb|EAA14814.5| AGAP008931-PA [Anopheles gambiae str. PEST]
CL2345.Contig2_CmRNA	320	2	0.7132	gi|195426766|ref|XP_002061468.1|	80.9	2e-14	GK20702 [Drosophila willistoni] >gi|194157553|gb|EDW72454.1| GK20702 [Drosophila willistoni]
CL2352.Contig1_CmRNA	1978	1168	67.3799	gi|189236792|ref|XP_966417.2|	650	0	PREDICTED: similar to protein phosphatase 1, catalytic subunit, beta isoform 1 [Tribolium castaneum]
CL2352.Contig2_CmRNA	1597	184	13.147	gi|114052575|ref|NP_001040480.1|	685	0	protein phosphatase 1 catalytic subunit [Bombyx mori] >gi|95103070|gb|ABF51476.1| protein phosphatase 1 catalytic subunit [Bombyx mori]
CL2352.Contig3_CmRNA	1227	7	0.651	gi|114052575|ref|NP_001040480.1|	683	0	protein phosphatase 1 catalytic subunit [Bombyx mori] >gi|95103070|gb|ABF51476.1| protein phosphatase 1 catalytic subunit [Bombyx mori]
CL2352.Contig4_CmRNA	1406	364	29.5413	gi|307182241|gb|EFN69572.1|	674	0	Serine/threonine-protein phosphatase alpha-1 isoform [Camponotus floridanus]
CL2353.Contig1_CmRNA	1237	1125	103.776	gi|160333484|ref|NP_001103768.1|	337	7e-91	myosin light polypeptide 9 isoform B [Bombyx mori] >gi|288856281|ref|NP_001103769.2| myosin light polypeptide 9 isoform B [Bombyx mori] >gi|87248543|gb|ABD36324.1| myosin light polypeptide 9 isoform 1 [Bombyx mori]
CL2354.Contig1_CmRNA	291	4	1.5685	gi|307694569|gb|ADN84937.1|	110	2e-23	axis inhibition protein [Biston betularia]
CL2354.Contig2_CmRNA	289	3	1.1845	gi|307694569|gb|ADN84937.1|	110	2e-23	axis inhibition protein [Biston betularia]
CL2356.Contig1_CmRNA	422	116	31.366	gi|114051598|ref|NP_001040416.1|	154	1e-36	leukotriene A4 hydrolase [Bombyx mori] >gi|95102808|gb|ABF51345.1| leukotriene A4 hydrolase [Bombyx mori]
CL236.Contig1_CmRNA	380	349	104.799	gi|315507099|gb|ADU33185.1|	99	5e-20	peptidoglycan recognition protein B [Ostrinia nubilalis]
CL2361.Contig1_CmRNA	946	7025	847.362	gi|345482820|ref|XP_003424671.1|	89.7	2e-16	PREDICTED: troponin C, isoform 1-like, partial [Nasonia vitripennis]
CL2364.Contig1_CmRNA	1154	62	6.1306	gi|112702923|emb|CAL36191.1|	255	3e-66	peptidoglycan-recognition protein-LB [Galleria mellonella]
CL2364.Contig2_CmRNA	1067	233	24.9175	gi|112702923|emb|CAL36191.1|	255	3e-66	peptidoglycan-recognition protein-LB [Galleria mellonella]
CL2366.Contig1_CmRNA	630	10	1.8112	gi|307185704|gb|EFN71620.1|	146	5e-34	Cytochrome b5 [Camponotus floridanus]
CL2366.Contig2_CmRNA	552	5	1.0336	gi|307185704|gb|EFN71620.1|	146	4e-34	Cytochrome b5 [Camponotus floridanus]
CL2367.Contig1_CmRNA	615	104	19.2962	gi|332019095|gb|EGI59623.1|	83.6	5e-15	hypothetical protein G5I_12215 [Acromyrmex echinatior]
CL2369.Contig1_CmRNA	553	66	13.6186	gi|157113361|ref|XP_001657795.1|	298	1e-79	mitosis protein dim1 [Aedes aegypti] >gi|94469104|gb|ABF18401.1| U4/U6.U5 snRNP/mitosis protein DIM1 component [Aedes aegypti] >gi|108877785|gb|EAT42010.1| mitosis protein dim1 [Aedes aegypti]
CL2370.Contig1_CmRNA	501	1524	347.105	gi|56462324|gb|AAV91445.1|	107	2e-22	hypothetical protein 32 [Lonomia obliqua]
CL2370.Contig2_CmRNA	500	1829	417.405	gi|56462324|gb|AAV91445.1|	107	2e-22	hypothetical protein 32 [Lonomia obliqua]
CL2370.Contig3_CmRNA	416	133	36.4814	gi|56462324|gb|AAV91445.1|	107	1e-22	hypothetical protein 32 [Lonomia obliqua]
CL2371.Contig1_CmRNA	2142	498	26.5292	gi|194881207|ref|XP_001974740.1|	452	1e-125	GG20942 [Drosophila erecta] >gi|190657927|gb|EDV55140.1| GG20942 [Drosophila erecta]
CL2373.Contig1_CmRNA	2295	204	10.1429	gi|82593864|ref|XP_725183.1|	130	2e-28	neurofilament protein H form H2 [Plasmodium yoelii yoelii str. 17XNL] >gi|23480092|gb|EAA16748.1| neurofilament protein H form H2 [Plasmodium yoelii yoelii]
CL2373.Contig2_CmRNA	2281	158	7.904	gi|82593864|ref|XP_725183.1|	130	2e-28	neurofilament protein H form H2 [Plasmodium yoelii yoelii str. 17XNL] >gi|23480092|gb|EAA16748.1| neurofilament protein H form H2 [Plasmodium yoelii yoelii]
CL2375.Contig1_CmRNA	248	12	5.5213	gi|345492146|ref|XP_001602270.2|	152	4e-36	PREDICTED: sister chromatid cohesion protein PDS5 homolog B-A isoform 1 [Nasonia vitripennis]
CL2376.Contig1_CmRNA	855	6218	829.847	gi|255652877|ref|NP_001157379.1|	216	1e-54	cuticular protein CPFL family 1 [Bombyx mori]
CL2378.Contig1_CmRNA	269	2	0.8484	gi|268531734|ref|XP_002630994.1|	73.6	2e-12	Hypothetical protein CBG02739 [Caenorhabditis briggsae]
CL2378.Contig2_CmRNA	239	1	0.4774	gi|25090538|sp|P83211.1|HSP1_MURBR	63.9	2e-09	RecName: Full=Sperm protamine P1; Flags: Precursor
CL2380.Contig1_CmRNA	2801	1023	41.6751	gi|123428136|ref|XP_001307407.1|	79.3	9e-13	viral A-type inclusion protein [Trichomonas vaginalis G3]
CL2382.Contig1_CmRNA	613	44	8.1904	gi|121949|sp|P06144.1|H1_LYTPI	67.4	4e-10	RecName: Full=Late histone H1
CL2382.Contig2_CmRNA	507	24	5.4015	gi|121949|sp|P06144.1|H1_LYTPI	67.4	2e-10	RecName: Full=Late histone H1
CL2383.Contig1_CmRNA	842	40	5.4208	gi|157111277|ref|XP_001651466.1|	224	4e-57	bifunctional aminoacyl-tRNA synthetase [Aedes aegypti] >gi|108878460|gb|EAT42685.1| bifunctional aminoacyl-tRNA synthetase [Aedes aegypti]
CL2383.Contig2_CmRNA	663	22	3.7864	gi|332019229|gb|EGI59739.1|	178	1e-43	Bifunctional aminoacyl-tRNA synthetase [Acromyrmex echinatior]
CL2387.Contig1_CmRNA	713	288	46.091	gi|325117360|emb|CBZ52912.1|	116	8e-25	serine protease inhibitor dipetalogastin precursor [Neospora caninum Liverpool]
CL2388.Contig1_CmRNA	876	4329	563.894	gi|307190221|gb|EFN74332.1|	248	2e-64	Chymotrypsin-1 [Camponotus floridanus]
CL2388.Contig2_CmRNA	676	1538	259.611	gi|307190221|gb|EFN74332.1|	203	6e-51	Chymotrypsin-1 [Camponotus floridanus]
CL239.Contig1_CmRNA	1657	54	3.7186	gi|158288998|ref|XP_310802.3|	677	0	AGAP000320-PA [Anopheles gambiae str. PEST]
CL239.Contig2_CmRNA	1609	57	4.0423	gi|333467125|gb|EGK96478.1|	622	1e-176	AGAP000320-PB [Anopheles gambiae str. PEST]
CL2393.Contig1_CmRNA	318	11	3.9471	gi|57506562|dbj|BAD86652.1|	162	3e-39	reverse transcriptase [Bombyx mori]
CL2393.Contig2_CmRNA	286	11	4.3887	gi|57506562|dbj|BAD86652.1|	82.8	4e-15	reverse transcriptase [Bombyx mori]
CL2394.Contig1_CmRNA	302	2	0.7557	gi|158292107|ref|XP_562126.3|	88.2	1e-16	AGAP004376-PA [Anopheles gambiae str. PEST] >gi|157017277|gb|EAL40526.3| AGAP004376-PA [Anopheles gambiae str. PEST]
CL2394.Contig2_CmRNA	289	18	7.107	gi|158292107|ref|XP_562126.3|	88.2	1e-16	AGAP004376-PA [Anopheles gambiae str. PEST] >gi|157017277|gb|EAL40526.3| AGAP004376-PA [Anopheles gambiae str. PEST]
CL2394.Contig3_CmRNA	1278	284	25.3572	gi|157126610|ref|XP_001654671.1|	395	1e-108	aldose-1-epimerase [Aedes aegypti] >gi|108873194|gb|EAT37419.1| aldose-1-epimerase [Aedes aegypti]
CL2396.Contig1_CmRNA	1991	119	6.8201	gi|328787929|ref|XP_395212.4|	1143	0	PREDICTED: spectrin beta chain [Apis mellifera]
CL2396.Contig2_CmRNA	1425	11	0.8808	gi|328787929|ref|XP_395212.4|	861	0	PREDICTED: spectrin beta chain [Apis mellifera]
CL24.Contig1_CmRNA	742	372	57.2075	gi|198429187|ref|XP_002120948.1|	70.5	7e-11	PREDICTED: similar to CG16995 CG16995-PA [Ciona intestinalis]
CL240.Contig1_CmRNA	1978	330	19.0371	gi|258597770|ref|XP_001348500.2|	124	1e-26	dynein-related AAA-type ATPase [Plasmodium falciparum 3D7] >gi|255528838|gb|AAN36939.2| dynein-related AAA-type ATPase [Plasmodium falciparum 3D7]
CL2402.Contig1_CmRNA	1183	11	1.061	gi|157105157|ref|XP_001648742.1|	452	1e-125	myosin vi [Aedes aegypti] >gi|108880163|gb|EAT44388.1| myosin vi [Aedes aegypti]
CL2402.Contig2_CmRNA	796	17	2.437	gi|157105157|ref|XP_001648742.1|	394	1e-108	myosin vi [Aedes aegypti] >gi|108880163|gb|EAT44388.1| myosin vi [Aedes aegypti]
CL2404.Contig1_CmRNA	519	0	0	gi|156553597|ref|XP_001599316.1|	295	6e-79	PREDICTED: ADP-ribosylation factor-like protein 8B-A-like [Nasonia vitripennis]
CL2404.Contig2_CmRNA	490	9	2.0958	gi|114051594|ref|NP_001040168.1|	278	8e-74	ADP-ribosylation factor-like protein [Bombyx mori] >gi|87248265|gb|ABD36185.1| ADP-ribosylation factor-like protein [Bombyx mori]
CL2404.Contig3_CmRNA	437	0	0	gi|114051594|ref|NP_001040168.1|	275	3e-73	ADP-ribosylation factor-like protein [Bombyx mori] >gi|87248265|gb|ABD36185.1| ADP-ribosylation factor-like protein [Bombyx mori]
CL2405.Contig1_CmRNA	806	217	30.7212	gi|91091344|ref|XP_972146.1|	159	1e-37	PREDICTED: similar to matrix metalloproteinase [Tribolium castaneum]
CL2409.Contig1_CmRNA	959	6	0.7139	gi|114051515|ref|NP_001040359.1|	518	1e-145	elongation factor Ts [Bombyx mori] >gi|95102626|gb|ABF51251.1| elongation factor Ts [Bombyx mori]
CL2409.Contig2_CmRNA	938	7	0.8515	gi|114051515|ref|NP_001040359.1|	518	1e-145	elongation factor Ts [Bombyx mori] >gi|95102626|gb|ABF51251.1| elongation factor Ts [Bombyx mori]
CL2410.Contig1_CmRNA	933	39	4.7698	gi|194246356|gb|ACF35640.1|	102	2e-20	pacifastin [Eriocheir sinensis]
CL2410.Contig2_CmRNA	804	59	8.3735	gi|170049694|ref|XP_001858079.1|	89.7	1e-16	pacifastin light chain [Culex quinquefasciatus] >gi|167871466|gb|EDS34849.1| pacifastin light chain [Culex quinquefasciatus]
CL2411.Contig1_CmRNA	258	18	7.961	gi|115767226|ref|XP_782654.2|	86.3	4e-16	PREDICTED: similar to Cpsf6 protein, partial [Strongylocentrotus purpuratus] >gi|115951833|ref|XP_001180349.1| PREDICTED: similar to Cpsf6 protein, partial [Strongylocentrotus purpuratus]
CL2412.Contig1_CmRNA	273	12	5.0157	gi|261331295|emb|CBH14285.1|	63.5	3e-09	T. brucei spp.-specific protein [Trypanosoma brucei gambiense DAL972]
CL2412.Contig2_CmRNA	403	9	2.5483	gi|170579958|ref|XP_001895056.1|	125	6e-28	Histidine-rich glycoprotein precursor [Brugia malayi]
CL2412.Contig3_CmRNA	314	2	0.7268	gi|170579958|ref|XP_001895056.1|	115	7e-25	Histidine-rich glycoprotein precursor [Brugia malayi]
CL2413.Contig1_CmRNA	708	2052	330.718	gi|307186122|gb|EFN71847.1|	363	3e-99	60S ribosomal protein L11 [Camponotus floridanus]
CL2413.Contig2_CmRNA	670	13396	2281.47	gi|268306376|gb|ACY95309.1|	385	1e-106	ribosomal protein L11 [Manduca sexta]
CL2414.Contig1_CmRNA	848	14	1.8838	gi|112982916|ref|NP_001037578.1|	323	8e-87	RNA binding motif protein Y14 [Bombyx mori] >gi|95102578|gb|ABF51227.1| RNA binding motif protein [Bombyx mori] >gi|95115210|gb|ABF55971.1| Tsu [Bombyx mori] >gi|221579722|gb|ACM24353.1| RNA-binding motif protein Y14 [Bombyx mori]
CL2414.Contig2_CmRNA	819	3	0.418	gi|112982916|ref|NP_001037578.1|	323	7e-87	RNA binding motif protein Y14 [Bombyx mori] >gi|95102578|gb|ABF51227.1| RNA binding motif protein [Bombyx mori] >gi|95115210|gb|ABF55971.1| Tsu [Bombyx mori] >gi|221579722|gb|ACM24353.1| RNA-binding motif protein Y14 [Bombyx mori]
CL2415.Contig1_CmRNA	631	562	101.63	gi|237506881|gb|ACQ99193.1|	132	1e-29	proline-rich protein [Galleria mellonella]
CL2415.Contig2_CmRNA	675	228	38.5429	gi|237506881|gb|ACQ99193.1|	128	2e-28	proline-rich protein [Galleria mellonella]
CL2416.Contig1_CmRNA	216	3	1.5848	gi|334348962|ref|XP_001380909.2|	88.2	1e-16	PREDICTED: eukaryotic translation initiation factor 4 gamma 1-like [Monodelphis domestica]
CL2417.Contig1_CmRNA	1825	5	0.3126	gi|57506570|dbj|BAD86656.1|	113	4e-23	reverse transcriptase [Bombyx mori]
CL2417.Contig2_CmRNA	774	12	1.7691	gi|125901787|gb|ABN58714.1|	95.1	3e-18	pol-like protein [Biomphalaria glabrata]
CL2423.Contig1_CmRNA	1447	191	15.0619	gi|309384283|ref|NP_001116822.2|	884	0	kinesin heavy chain [Bombyx mori] >gi|309378082|gb|ABK92268.2| kinesin-like protein 1 [Bombyx mori]
CL2423.Contig2_CmRNA	224	9	4.5847	gi|345485732|ref|XP_001606707.2|	145	5e-34	PREDICTED: kinesin heavy chain [Nasonia vitripennis]
CL2426.Contig2_CmRNA	1852	563	34.6881	gi|307190606|gb|EFN74588.1|	127	2e-27	Zinc metalloproteinase nas-14 [Camponotus floridanus]
CL2427.Contig1_CmRNA	796	89	12.7582	gi|195071537|ref|XP_001997102.1|	73.6	9e-12	GH12934 [Drosophila grimshawi] >gi|193905911|gb|EDW04778.1| GH12934 [Drosophila grimshawi]
CL2427.Contig2_CmRNA	1577	251	18.1617	gi|195071537|ref|XP_001997102.1|	68.9	6e-10	GH12934 [Drosophila grimshawi] >gi|193905911|gb|EDW04778.1| GH12934 [Drosophila grimshawi]
CL2429.Contig1_CmRNA	656	160	27.8311	gi|298204323|gb|ADI61810.1|	104	1e-36	endonuclease-reverse transcriptase [Bombyx mori]
CL243.Contig1_CmRNA	733	202	31.4457	gi|260908020|gb|ACX53809.1|	90.5	6e-17	DUF233 protein [Heliothis virescens]
CL243.Contig2_CmRNA	674	284	48.0808	gi|112983174|ref|NP_001036949.1|	91.3	3e-17	juvenile hormone binding protein e96h-0303 [Bombyx mori]
CL2430.Contig1_CmRNA	6297	350	6.3423	gi|183979376|dbj|BAG30740.1|	3660	0	muscle myosin heavy chain [Papilio xuthus]
CL2430.Contig2_CmRNA	6297	1436	26.0216	gi|183979376|dbj|BAG30740.1|	3632	0	muscle myosin heavy chain [Papilio xuthus]
CL2430.Contig3_CmRNA	6254	8	0.146	gi|183979376|dbj|BAG30740.1|	3704	0	muscle myosin heavy chain [Papilio xuthus]
CL2430.Contig4_CmRNA	6254	39	0.7116	gi|183979376|dbj|BAG30740.1|	3676	0	muscle myosin heavy chain [Papilio xuthus]
CL2431.Contig1_CmRNA	713	10	1.6004	gi|237648980|ref|NP_001153667.1|	177	5e-43	histone H2AX-like protein [Bombyx mori] >gi|223972588|dbj|BAH23275.1| histone H2AX-like protein [Bombyx mori]
CL2431.Contig2_CmRNA	681	5	0.8378	gi|237648980|ref|NP_001153667.1|	177	4e-43	histone H2AX-like protein [Bombyx mori] >gi|223972588|dbj|BAH23275.1| histone H2AX-like protein [Bombyx mori]
CL2436.Contig1_CmRNA	875	6	0.7825	gi|307196793|gb|EFN78236.1|	293	9e-78	Protein kinase C and casein kinase substrate in neurons protein 2 [Harpegnathos saltator]
CL2436.Contig2_CmRNA	874	13	1.6972	gi|307187113|gb|EFN72357.1|	307	5e-82	Protein kinase C and casein kinase substrate in neurons protein 2 [Camponotus floridanus]
CL2437.Contig1_CmRNA	232	11	5.4103	gi|258597185|ref|XP_001347711.2|	76.6	3e-13	Plasmodium exported protein [Plasmodium falciparum 3D7] >gi|254832585|gb|AAN35624.2| Plasmodium exported protein [Plasmodium falciparum 3D7]
CL244.Contig1_CmRNA	851	92	12.3359	gi|45554371|ref|NP_996366.1|	100	1e-19	lethal (1) G0193, isoform B [Drosophila melanogaster] >gi|45446846|gb|AAS65275.1| lethal (1) G0193, isoform B [Drosophila melanogaster]
CL2440.Contig2_CmRNA	1423	4294	344.327	gi|156553655|ref|XP_001600547.1|	462	1e-128	PREDICTED: malate dehydrogenase, mitochondrial-like [Nasonia vitripennis]
CL2442.Contig1_CmRNA	753	22	3.3338	gi|193688255|ref|XP_001945800.1|	118	3e-25	PREDICTED: SH2 domain-containing protein 4A-like [Acyrthosiphon pisum]
CL2445.Contig1_CmRNA	889	40	5.1342	gi|328786878|ref|XP_391860.4|	484	1e-135	PREDICTED: serine/arginine-rich splicing factor 4 [Apis mellifera]
CL2445.Contig2_CmRNA	865	33	4.3532	gi|328786878|ref|XP_391860.4|	459	1e-128	PREDICTED: serine/arginine-rich splicing factor 4 [Apis mellifera]
CL2446.Contig1_CmRNA	612	28	5.2206	gi|66564326|ref|XP_393632.2|	242	7e-63	PREDICTED: plasma glutamate carboxypeptidase-like isoform 1 [Apis mellifera]
CL245.Contig1_CmRNA	876	3532	460.077	gi|195012518|ref|XP_001983683.1|	124	4e-27	GH16018 [Drosophila grimshawi] >gi|193897165|gb|EDV96031.1| GH16018 [Drosophila grimshawi]
CL2450.Contig1_CmRNA	323	9	3.1795	gi|307183643|gb|EFN70346.1|	196	3e-49	Filamin-B [Camponotus floridanus]
CL2450.Contig2_CmRNA	231	0	0	gi|307183643|gb|EFN70346.1|	134	9e-31	Filamin-B [Camponotus floridanus]
CL2456.Contig2_CmRNA	1553	283	20.7935	gi|328786724|ref|XP_395500.4|	82	7e-14	PREDICTED: DNA replication licensing factor MCM8 [Apis mellifera]
CL2457.Contig1_CmRNA	1743	8867	580.488	gi|74956512|sp|O02464.2|OPS1_MANSE	711	0	RecName: Full=Opsin-1; Short=MANOP1; AltName: Full=Rhodopsin 1, long-wavelength; AltName: Full=Rhodopsin P520 >gi|4210483|gb|AAD11964.1| opsin [Manduca sexta]
CL2459.Contig1_CmRNA	395	54	15.5995	gi|334326530|ref|XP_001374778.2|	58.2	1e-07	PREDICTED: perilipin-4-like [Monodelphis domestica]
CL2464.Contig1_CmRNA	404	54	15.252	gi|291245027|ref|XP_002742394.1|	128	6e-29	PREDICTED: novel KRAB box domain containing protein-like [Saccoglossus kowalevskii]
CL2467.Contig1_CmRNA	637	52	9.3149	gi|195392842|ref|XP_002055063.1|	177	4e-43	GJ19169 [Drosophila virilis] >gi|194149573|gb|EDW65264.1| GJ19169 [Drosophila virilis]
CL2468.Contig1_CmRNA	578	52	10.2657	gi|345481582|ref|XP_003424406.1|	114	2e-24	PREDICTED: lipase 3-like [Nasonia vitripennis]
CL2468.Contig2_CmRNA	357	15	4.7944	gi|157132167|ref|XP_001662495.1|	58.2	1e-07	lipase 1 precursor [Aedes aegypti] >gi|108871262|gb|EAT35487.1| lipase 1 precursor [Aedes aegypti]
CL247.Contig1_CmRNA	403	21	5.946	gi|298204323|gb|ADI61810.1|	226	3e-58	endonuclease-reverse transcriptase [Bombyx mori]
CL2470.Contig1_CmRNA	584	15	2.9308	gi|24583731|ref|NP_723687.1|	375	1e-103	crooked legs, isoform D [Drosophila melanogaster] >gi|21428976|gb|AAM50207.1| GH27971p [Drosophila melanogaster] >gi|22946266|gb|AAN10785.1| crooked legs, isoform D [Drosophila melanogaster]
CL2470.Contig2_CmRNA	569	28	5.6151	gi|24583731|ref|NP_723687.1|	369	1e-101	crooked legs, isoform D [Drosophila melanogaster] >gi|21428976|gb|AAM50207.1| GH27971p [Drosophila melanogaster] >gi|22946266|gb|AAN10785.1| crooked legs, isoform D [Drosophila melanogaster]
CL2471.Contig1_CmRNA	787	308	44.657	gi|114050747|ref|NP_001040106.1|	385	1e-106	coiled-coil domain containing 25 protein [Bombyx mori] >gi|87248079|gb|ABD36092.1| coiled-coil domain containing 25 protein [Bombyx mori]
CL2472.Contig1_CmRNA	209	11	6.0057	gi|307203013|gb|EFN82229.1|	95.9	5e-19	G-protein coupled receptor 143 [Harpegnathos saltator]
CL2476.Contig1_CmRNA	708	280	45.1272	gi|156537980|ref|XP_001608187.1|	150	6e-35	PREDICTED: sequestosome-1-like [Nasonia vitripennis]
CL2477.Contig1_CmRNA	242	3	1.4146	gi|304307735|ref|NP_001182007.1|	95.9	5e-19	R2D2 protein [Bombyx mori] >gi|300669731|dbj|BAJ11654.1| R2D2 [Bombyx mori]
CL2477.Contig2_CmRNA	357	13	4.1552	gi|304307735|ref|NP_001182007.1|	95.9	5e-19	R2D2 protein [Bombyx mori] >gi|300669731|dbj|BAJ11654.1| R2D2 [Bombyx mori]
CL2479.Contig1_CmRNA	409	21	5.8588	gi|315131351|emb|CBM69284.1|	62	7e-09	venom protein Vem17 [Chelonus inanitus]
CL2479.Contig2_CmRNA	323	14	4.9458	gi|315131351|emb|CBM69284.1|	57.8	1e-07	venom protein Vem17 [Chelonus inanitus]
CL2484.Contig1_CmRNA	993	211007	24247.2	gi|119627579|gb|EAX07174.1|	96.3	2e-18	hCG1793893 [Homo sapiens]
CL2485.Contig1_CmRNA	1029	31	3.4376	gi|91094571|ref|XP_968574.1|	140	1e-31	PREDICTED: similar to IP15312p [Tribolium castaneum]
CL2485.Contig2_CmRNA	984	27	3.131	gi|91094571|ref|XP_968574.1|	141	5e-32	PREDICTED: similar to IP15312p [Tribolium castaneum]
CL2486.Contig1_CmRNA	2627	2158	93.7357	gi|345480104|ref|XP_001606829.2|	1258	0	PREDICTED: cullin-1 isoform 1 [Nasonia vitripennis] >gi|345480106|ref|XP_003424085.1| PREDICTED: cullin-1 isoform 2 [Nasonia vitripennis] >gi|345480108|ref|XP_003424086.1| PREDICTED: cullin-1 isoform 3 [Nasonia vitripennis]
CL2487.Contig1_CmRNA	430	21	5.5727	gi|152012594|gb|AAI50236.1|	80.1	3e-14	Wu:fb54a03 protein [Danio rerio]
CL2487.Contig2_CmRNA	344	35	11.6098	gi|148708819|gb|EDL40766.1|	77	2e-13	U2 small nuclear ribonucleoprotein auxiliary factor (U2AF) 1, related sequence 2 [Mus musculus]
CL2489.Contig1_CmRNA	1993	144	8.2446	gi|328784011|ref|XP_624898.3|	543	1e-152	PREDICTED: protein KIAA0664 homolog [Apis mellifera]
CL2489.Contig2_CmRNA	1884	32	1.9381	gi|328784011|ref|XP_624898.3|	543	1e-152	PREDICTED: protein KIAA0664 homolog [Apis mellifera]
CL2489.Contig3_CmRNA	1777	110	7.0635	gi|328784011|ref|XP_624898.3|	543	1e-152	PREDICTED: protein KIAA0664 homolog [Apis mellifera]
CL249.Contig1_CmRNA	778	147	21.5601	gi|307179238|gb|EFN67634.1|	73.6	9e-12	Putative uncharacterized transposon-derived protein F52C9.6 [Camponotus floridanus]
CL2491.Contig1_CmRNA	765	217	32.3677	gi|229577296|ref|NP_001153344.1|	468	1e-130	tropomyosin 1 isoform B [Nasonia vitripennis] >gi|229577298|ref|NP_001153345.1| tropomyosin 1 isoform B [Nasonia vitripennis]
CL2491.Contig2_CmRNA	1189	457	43.8579	gi|160333851|ref|NP_001103782.1|	526	1e-148	tropomyosin-2 isoform 1 [Bombyx mori] >gi|121958881|sp|Q1HPQ0.1|TPM2_BOMMO RecName: Full=Tropomyosin-2 >gi|95103000|gb|ABF51441.1| tropomyosin isoform 1 [Bombyx mori] >gi|204324081|gb|ACI01047.1| actotropomyosin [Bombyx mori]
CL2491.Contig3_CmRNA	1165	417	40.8436	gi|160333851|ref|NP_001103782.1|	501	1e-140	tropomyosin-2 isoform 1 [Bombyx mori] >gi|121958881|sp|Q1HPQ0.1|TPM2_BOMMO RecName: Full=Tropomyosin-2 >gi|95103000|gb|ABF51441.1| tropomyosin isoform 1 [Bombyx mori] >gi|204324081|gb|ACI01047.1| actotropomyosin [Bombyx mori]
CL2491.Contig4_CmRNA	351	87	28.283	gi|333469979|gb|EGK97469.1|	114	2e-24	AGAP001797-PD [Anopheles gambiae str. PEST]
CL2493.Contig1_CmRNA	2119	447	24.0708	gi|157419934|gb|ABV55505.1|	1099	0	heat shock protein 70 [Microplitis mediator]
CL2493.Contig2_CmRNA	281	155	62.9418	gi|25527326|gb|AAN73310.1|	166	2e-40	heat-shock protein 70 [Cotesia rubecula]
CL2494.Contig1_CmRNA	1251	265	24.1714	gi|226693130|dbj|BAH56565.1|	424	1e-117	sepiapterin reductase [Bombyx mori]
CL2494.Contig2_CmRNA	429	3	0.798	gi|194905892|ref|XP_001981278.1|	52.8	5e-06	GG11711 [Drosophila erecta] >gi|190655916|gb|EDV53148.1| GG11711 [Drosophila erecta]
CL2495.Contig1_CmRNA	773	1445	213.305	gi|340715434|ref|XP_003396218.1|	418	1e-115	PREDICTED: LOW QUALITY PROTEIN: 60S ribosomal protein L10a-like [Bombus terrestris]
CL25.Contig1_CmRNA	855	13	1.735	gi|91085439|ref|XP_968976.1|	146	1e-33	PREDICTED: similar to prenylated rab acceptor [Tribolium castaneum]
CL25.Contig2_CmRNA	911	10	1.2526	gi|91085439|ref|XP_968976.1|	146	1e-33	PREDICTED: similar to prenylated rab acceptor [Tribolium castaneum]
CL250.Contig1_CmRNA	526	1694	367.486	gi|299930745|gb|ADJ58588.1|	100	2e-20	seminal fluid protein HACP057 [Heliconius melpomene]
CL2500.Contig1_CmRNA	558	206	42.1257	gi|114051980|ref|NP_001040200.1|	195	8e-49	Myb-MuvB complex subunit Lin-52 [Bombyx mori] >gi|87248367|gb|ABD36236.1| Myb-MuvB complex subunit Lin-52 [Bombyx mori]
CL2500.Contig2_CmRNA	516	58	12.826	gi|114051980|ref|NP_001040200.1|	128	1e-28	Myb-MuvB complex subunit Lin-52 [Bombyx mori] >gi|87248367|gb|ABD36236.1| Myb-MuvB complex subunit Lin-52 [Bombyx mori]
CL2502.Contig1_CmRNA	425	84	22.553	gi|340716845|ref|XP_003396903.1|	137	1e-31	PREDICTED: LOW QUALITY PROTEIN: general transcription factor IIE subunit 2-like [Bombus terrestris]
CL2515.Contig1_CmRNA	215	5	2.6537	gi|2506286|sp|P08930.2|CHCB2_ANTPO	63.9	2e-09	RecName: Full=Chorion class CB protein PC404 >gi|155847|gb|AAA27787.1| class C chorion protein [Antheraea polyphemus]
CL2516.Contig1_CmRNA	1518	49	3.6833	gi|319891036|gb|ADV76085.1|	714	0	lethal giant larvae [Biston betularia]
CL2516.Contig2_CmRNA	1516	30	2.2581	gi|319891036|gb|ADV76085.1|	714	0	lethal giant larvae [Biston betularia]
CL2517.Contig1_CmRNA	1102	127	13.1503	gi|332028574|gb|EGI68611.1|	316	1e-84	RNA-binding protein cabeza [Acromyrmex echinatior]
CL2517.Contig2_CmRNA	622	1	0.1835	gi|332028574|gb|EGI68611.1|	148	1e-34	RNA-binding protein cabeza [Acromyrmex echinatior]
CL2520.Contig1_CmRNA	655	10	1.7421	gi|91081535|ref|XP_974904.1|	224	3e-57	PREDICTED: similar to Suv4-20 CG13363-PA [Tribolium castaneum]
CL2520.Contig2_CmRNA	567	6	1.2075	gi|91081535|ref|XP_974904.1|	224	2e-57	PREDICTED: similar to Suv4-20 CG13363-PA [Tribolium castaneum]
CL2522.Contig1_CmRNA	604	112	21.159	gi|208972549|gb|ACI32835.1|	112	1e-23	serine proteinase-like protein 1 [Helicoverpa armigera]
CL2523.Contig1_CmRNA	740	67	10.3313	gi|158295625|ref|XP_001237787.2|	73.2	1e-11	AGAP006255-PA [Anopheles gambiae str. PEST] >gi|157016126|gb|EAU76573.2| AGAP006255-PA [Anopheles gambiae str. PEST]
CL2523.Contig2_CmRNA	713	13	2.0805	gi|158295625|ref|XP_001237787.2|	73.2	1e-11	AGAP006255-PA [Anopheles gambiae str. PEST] >gi|157016126|gb|EAU76573.2| AGAP006255-PA [Anopheles gambiae str. PEST]
CL2525.Contig1_CmRNA	1425	27	2.162	gi|112983834|ref|NP_001037293.1|	695	0	RNA-binding protein lark [Bombyx mori] >gi|57236850|gb|AAW48898.1| lark-PA [Bombyx mori]
CL2525.Contig2_CmRNA	1365	31	2.5914	gi|112983834|ref|NP_001037293.1|	646	0	RNA-binding protein lark [Bombyx mori] >gi|57236850|gb|AAW48898.1| lark-PA [Bombyx mori]
CL2526.Contig1_CmRNA	1287	686	60.8218	gi|189181680|ref|NP_001121191.1|	544	1e-153	integument esterase 2 [Bombyx mori] >gi|187372908|gb|ACD03181.1| carboxylesterase CarE-12 [Bombyx mori]
CL2526.Contig2_CmRNA	1879	24	1.4575	gi|313506246|gb|ADR64702.1|	697	0	CarE [Spodoptera exigua]
CL2526.Contig3_CmRNA	1775	53	3.4071	gi|313506246|gb|ADR64702.1|	697	0	CarE [Spodoptera exigua]
CL2528.Contig1_CmRNA	534	2503	534.851	gi|257124471|gb|ACV41934.1|	191	1e-47	pyriform spidroin 1 [Latrodectus hesperus]
CL2528.Contig2_CmRNA	468	1754	427.659	gi|257124471|gb|ACV41934.1|	172	3e-42	pyriform spidroin 1 [Latrodectus hesperus]
CL253.Contig1_CmRNA	376	47	14.2634	gi|255918121|ref|NP_001157607.1|	211	8e-54	fruitless isoform B2 [Nasonia vitripennis] >gi|255504435|gb|ACU12208.1| fruitless transcript variant P6-B [Nasonia vitripennis]
CL2530.Contig1_CmRNA	840	68	9.2373	gi|170038102|ref|XP_001846892.1|	285	2e-75	ATP-binding cassette sub-family A member 1 [Culex quinquefasciatus] >gi|167881512|gb|EDS44895.1| ATP-binding cassette sub-family A member 1 [Culex quinquefasciatus]
CL2538.Contig1_CmRNA	1087	197	20.68	gi|16798420|gb|AAL29454.1|AF430246_1	530	1e-149	acyl-CoA delta-9 desaturase [Ostrinia nubilalis] >gi|16797679|gb|AAL27034.1| acyl-CoA delta-9 desaturase [Ostrinia furnacalis]
CL2538.Contig2_CmRNA	991	285	32.8159	gi|16798420|gb|AAL29454.1|AF430246_1	530	1e-149	acyl-CoA delta-9 desaturase [Ostrinia nubilalis] >gi|16797679|gb|AAL27034.1| acyl-CoA delta-9 desaturase [Ostrinia furnacalis]
CL2539.Contig1_CmRNA	1076	230	24.391	gi|168823421|ref|NP_001108344.1|	142	3e-32	facilitated trehalose transporter Tret1 [Bombyx mori] >gi|300681184|sp|A9ZSY3.1|TRET1_BOMMO RecName: Full=Facilitated trehalose transporter Tret1; Short=BmTRET1 >gi|164454395|dbj|BAF96744.1| trehalose transporter BmTRET1 [Bombyx mori]
CL2539.Contig2_CmRNA	702	404	65.6686	gi|168823421|ref|NP_001108344.1|	142	1e-32	facilitated trehalose transporter Tret1 [Bombyx mori] >gi|300681184|sp|A9ZSY3.1|TRET1_BOMMO RecName: Full=Facilitated trehalose transporter Tret1; Short=BmTRET1 >gi|164454395|dbj|BAF96744.1| trehalose transporter BmTRET1 [Bombyx mori]
CL2543.Contig1_CmRNA	481	11	2.6095	gi|340719709|ref|XP_003398290.1|	110	3e-23	PREDICTED: pumilio homolog 1-like [Bombus terrestris]
CL2543.Contig2_CmRNA	450	9	2.2821	gi|270016510|gb|EFA12956.1|	102	7e-21	pumilio [Tribolium castaneum]
CL2544.Contig1_CmRNA	515	3	0.6647	gi|327273103|ref|XP_003221322.1|	74.7	2e-12	PREDICTED: interleukin-1 receptor-associated kinase 4-like [Anolis carolinensis]
CL2544.Contig2_CmRNA	510	6	1.3424	gi|327273103|ref|XP_003221322.1|	74.7	2e-12	PREDICTED: interleukin-1 receptor-associated kinase 4-like [Anolis carolinensis]
CL2552.Contig1_CmRNA	470	7	1.6995	gi|332016613|gb|EGI57485.1|	248	6e-65	A disintegrin and metalloproteinase with thrombospondin motifs 16 [Acromyrmex echinatior]
CL2552.Contig2_CmRNA	439	4	1.0397	gi|307180319|gb|EFN68352.1|	260	1e-68	A disintegrin and metalloproteinase with thrombospondin motifs 16 [Camponotus floridanus]
CL2553.Contig1_CmRNA	209	18	9.8274	gi|284413718|ref|NP_001165114.1|	132	4e-30	collagen [Bombyx mori]
CL2556.Contig1_CmRNA	1194	16	1.5291	gi|66564357|ref|XP_624474.1|	415	1e-114	PREDICTED: methyltransferase-like isoform 1 [Apis mellifera]
CL2556.Contig2_CmRNA	1037	20	2.2007	gi|66564357|ref|XP_624474.1|	432	1e-119	PREDICTED: methyltransferase-like isoform 1 [Apis mellifera]
CL2558.Contig1_CmRNA	1266	335	30.1943	gi|158121991|gb|ABW17157.1|	273	1e-71	serine protease inhibitor 1c [Choristoneura fumiferana]
CL2558.Contig2_CmRNA	1231	291	26.9742	gi|158121989|gb|ABW17156.1|	296	1e-78	serine protease inhibitor 1b [Choristoneura fumiferana]
CL2559.Contig1_CmRNA	900	18	2.2821	gi|345490216|ref|XP_003426329.1|	399	1e-110	PREDICTED: dnaJ homolog subfamily C member 7-like isoform 2 [Nasonia vitripennis]
CL2559.Contig2_CmRNA	876	27	3.517	gi|345490216|ref|XP_003426329.1|	394	1e-108	PREDICTED: dnaJ homolog subfamily C member 7-like isoform 2 [Nasonia vitripennis]
CL2561.Contig1_CmRNA	348	23269	7629.78	gi|195432715|ref|XP_002064362.1|	68.9	6e-11	GK19734 [Drosophila willistoni] >gi|194160447|gb|EDW75348.1| GK19734 [Drosophila willistoni]
CL2563.Contig1_CmRNA	838	63	8.5785	gi|328779875|ref|XP_397080.4|	325	1e-87	PREDICTED: epithelial splicing regulatory protein 2 [Apis mellifera]
CL2563.Contig2_CmRNA	570	12	2.4023	gi|332029325|gb|EGI69308.1|	298	1e-79	RNA-binding protein fusilli [Acromyrmex echinatior]
CL2565.Contig1_CmRNA	799	256	36.5601	gi|289655830|gb|ADD14027.1|	312	1e-83	glutathione S-transferase sigma [Chilo suppressalis]
CL2565.Contig2_CmRNA	772	77	11.3812	gi|289655830|gb|ADD14027.1|	293	4e-78	glutathione S-transferase sigma [Chilo suppressalis]
CL2568.Contig1_CmRNA	1962	106	6.1648	gi|340718898|ref|XP_003397899.1|	713	0	PREDICTED: RNA-binding protein 39-like isoform 1 [Bombus terrestris]
CL2568.Contig2_CmRNA	1881	28	1.6986	gi|340718900|ref|XP_003397900.1|	685	0	PREDICTED: RNA-binding protein 39-like isoform 2 [Bombus terrestris]
CL2570.Contig1_CmRNA	496	6	1.3803	gi|110760070|ref|XP_393365.3|	214	9e-55	PREDICTED: interferon regulatory factor 2-binding protein 2-like [Apis mellifera]
CL2570.Contig2_CmRNA	391	4	1.1673	gi|110760070|ref|XP_393365.3|	206	2e-52	PREDICTED: interferon regulatory factor 2-binding protein 2-like [Apis mellifera]
CL2572.Contig1_CmRNA	485	366	86.1099	gi|171740887|gb|ACB54938.1|	90.9	2e-17	trypsin [Helicoverpa armigera]
CL2575.Contig1_CmRNA	423	297	80.1179	gi|66551967|ref|XP_624896.1|	213	2e-54	PREDICTED: 60S ribosomal protein L13 isoform 1 [Apis mellifera]
CL2575.Contig2_CmRNA	325	85	29.8435	gi|62083461|gb|AAX62455.1|	165	6e-40	ribosomal protein L13 [Lysiphlebus testaceipes]
CL2575.Contig3_CmRNA	748	2051	312.88	gi|62083461|gb|AAX62455.1|	343	6e-93	ribosomal protein L13 [Lysiphlebus testaceipes]
CL2577.Contig1_CmRNA	694	43	7.0701	gi|307183095|gb|EFN70012.1|	159	8e-38	Palmitoyltransferase ZDHHC2 [Camponotus floridanus]
CL2577.Contig2_CmRNA	452	16	4.0392	gi|328780750|ref|XP_623389.2|	159	3e-38	PREDICTED: palmitoyltransferase ZDHHC2-like [Apis mellifera]
CL2578.Contig1_CmRNA	627	85	15.4691	gi|157130274|ref|XP_001661865.1|	122	1e-26	transcription elongation regulator 1 (ca150) [Aedes aegypti] >gi|108871925|gb|EAT36150.1| transcription elongation regulator 1 (ca150) [Aedes aegypti]
CL2580.Contig1_CmRNA	757	6	0.9044	gi|114051666|ref|NP_001040172.1|	342	8e-93	peptidyl-prolyl cis-trans isomerase [Bombyx mori] >gi|87248281|gb|ABD36193.1| peptidyl-prolyl cis-trans isomerase [Bombyx mori]
CL2580.Contig2_CmRNA	726	13	2.0432	gi|114051666|ref|NP_001040172.1|	342	7e-93	peptidyl-prolyl cis-trans isomerase [Bombyx mori] >gi|87248281|gb|ABD36193.1| peptidyl-prolyl cis-trans isomerase [Bombyx mori]
CL2581.Contig1_CmRNA	1712	2078	138.502	gi|237636932|gb|ACR07788.1|	468	1e-130	14-3-3 zeta [Heliothis virescens]
CL2582.Contig1_CmRNA	798	12	1.7159	gi|158294812|ref|XP_001688731.1|	141	3e-32	AGAP005807-PC [Anopheles gambiae str. PEST] >gi|157015739|gb|EDO63737.1| AGAP005807-PC [Anopheles gambiae str. PEST]
CL2582.Contig2_CmRNA	879	682	88.5338	gi|158294812|ref|XP_001688731.1|	154	6e-36	AGAP005807-PC [Anopheles gambiae str. PEST] >gi|157015739|gb|EDO63737.1| AGAP005807-PC [Anopheles gambiae str. PEST]
CL2588.Contig1_CmRNA	693	12	1.9759	gi|307189928|gb|EFN74164.1|	135	2e-30	Homeotic protein spalt-major [Camponotus floridanus]
CL2588.Contig2_CmRNA	405	3	0.8452	gi|270008162|gb|EFA04610.1|	120	2e-26	spalt [Tribolium castaneum]
CL2588.Contig3_CmRNA	253	2	0.902	gi|340719111|ref|XP_003398000.1|	52.8	5e-06	PREDICTED: hypothetical protein LOC100642338 [Bombus terrestris]
CL2590.Contig1_CmRNA	280	13	5.2978	gi|156537151|ref|XP_001603698.1|	95.9	5e-19	PREDICTED: histone-lysine N-methyltransferase eggless [Nasonia vitripennis]
CL2596.Contig1_CmRNA	1398	49	3.9995	gi|289900832|gb|ADD21556.1|	290	2e-76	thymosin isoform 1 [Helicoverpa armigera]
CL2596.Contig2_CmRNA	1284	139	12.3527	gi|289900832|gb|ADD21556.1|	258	6e-67	thymosin isoform 1 [Helicoverpa armigera]
CL2596.Contig3_CmRNA	1284	70	6.2208	gi|289900832|gb|ADD21556.1|	329	2e-88	thymosin isoform 1 [Helicoverpa armigera]
CL2596.Contig4_CmRNA	1170	97	9.4602	gi|289900835|gb|ADD21558.1|	261	3e-68	thymosin isoform 2 [Helicoverpa armigera]
CL2604.Contig1_CmRNA	481	9	2.1351	gi|326434248|gb|EGD79818.1|	71.6	1e-11	annexin A7 [Salpingoeca sp. ATCC 50818]
CL2604.Contig2_CmRNA	475	6	1.4414	gi|326434248|gb|EGD79818.1|	72	8e-12	annexin A7 [Salpingoeca sp. ATCC 50818]
CL261.Contig2_CmRNA	2254	1145	57.9649	gi|114051832|ref|NP_001040186.1|	486	1e-135	erythrocyte carbonic anhydrase [Bombyx mori] >gi|87248315|gb|ABD36210.1| erythrocyte carbonic anhydrase [Bombyx mori]
CL2613.Contig1_CmRNA	1907	1460	87.3606	gi|454844|gb|AAA29909.1|	151	1e-34	ORF 3 [Schistosoma mansoni]
CL2613.Contig2_CmRNA	1847	214	13.2209	gi|74853180|sp|Q54KX0.1|GTAN_DICDI	137	2e-30	RecName: Full=GATA zinc finger domain-containing protein 14
CL2613.Contig3_CmRNA	1877	9	0.5471	gi|454844|gb|AAA29909.1|	139	5e-31	ORF 3 [Schistosoma mansoni]
CL2613.Contig4_CmRNA	1937	920	54.1966	gi|454844|gb|AAA29909.1|	155	5e-36	ORF 3 [Schistosoma mansoni]
CL2614.Contig1_CmRNA	1101	8	0.8291	gi|170063054|ref|XP_001866937.1|	120	1e-25	scavenger receptor cysteine-rich protein [Culex quinquefasciatus] >gi|167880823|gb|EDS44206.1| scavenger receptor cysteine-rich protein [Culex quinquefasciatus]
CL2614.Contig2_CmRNA	455	5	1.2539	gi|158935824|emb|CAP16296.1|	70.9	2e-11	C. elegans protein Y69H2.3e, confirmed by transcript evidence [Caenorhabditis elegans]
CL2614.Contig3_CmRNA	1674	72	4.9078	gi|25005162|emb|CAD56616.1|	158	9e-37	C. elegans protein Y69H2.3c, confirmed by transcript evidence [Caenorhabditis elegans]
CL2615.Contig1_CmRNA	1330	7	0.6006	gi|332025645|gb|EGI65807.1|	227	1e-57	Lactosylceramide 4-alpha-galactosyltransferase [Acromyrmex echinatior]
CL2615.Contig2_CmRNA	1296	15	1.3207	gi|332025645|gb|EGI65807.1|	227	1e-57	Lactosylceramide 4-alpha-galactosyltransferase [Acromyrmex echinatior]
CL2619.Contig1_CmRNA	686	40	6.6535	gi|157105157|ref|XP_001648742.1|	215	1e-54	myosin vi [Aedes aegypti] >gi|108880163|gb|EAT44388.1| myosin vi [Aedes aegypti]
CL2619.Contig2_CmRNA	641	27	4.8064	gi|189234407|ref|XP_975060.2|	215	1e-54	PREDICTED: similar to myosin vi [Tribolium castaneum]
CL2627.Contig1_CmRNA	265	7	3.0142	gi|328792914|ref|XP_397416.3|	117	2e-25	PREDICTED: CD109 antigen [Apis mellifera]
CL2636.Contig1_CmRNA	1248	304	27.7954	gi|114052520|ref|NP_001040251.1|	432	1e-119	C-type lectin 5 [Bombyx mori] >gi|87248519|gb|ABD36312.1| lectin 4 C-type lectin [Bombyx mori]
CL2636.Contig2_CmRNA	1207	168	15.8824	gi|114052520|ref|NP_001040251.1|	432	1e-119	C-type lectin 5 [Bombyx mori] >gi|87248519|gb|ABD36312.1| lectin 4 C-type lectin [Bombyx mori]
CL264.Contig2_CmRNA	1428	92	7.3515	gi|83282476|ref|XP_729787.1|	63.9	2e-08	hypothetical protein [Plasmodium yoelii yoelii str. 17XNL] >gi|23488575|gb|EAA21352.1| hypothetical protein [Plasmodium yoelii yoelii]
CL2642.Contig1_CmRNA	3253	107	3.7533	gi|270014225|gb|EFA10673.1|	829	0	muscle-specific protein 300 [Tribolium castaneum]
CL2642.Contig2_CmRNA	3292	147	5.0953	gi|270014225|gb|EFA10673.1|	818	0	muscle-specific protein 300 [Tribolium castaneum]
CL2647.Contig1_CmRNA	3542	40	1.2886	gi|195383522|ref|XP_002050475.1|	1600	0	GJ20184 [Drosophila virilis] >gi|194145272|gb|EDW61668.1| GJ20184 [Drosophila virilis]
CL2647.Contig2_CmRNA	3509	68	2.2113	gi|195383522|ref|XP_002050475.1|	1578	0	GJ20184 [Drosophila virilis] >gi|194145272|gb|EDW61668.1| GJ20184 [Drosophila virilis]
CL265.Contig1_CmRNA	609	633	118.604	gi|225348765|gb|ACN87361.1|	112	8e-24	cross-beta structure silk protein 1 [Mallada signata]
CL265.Contig2_CmRNA	1079	142	15.0169	gi|195442748|ref|XP_002069108.1|	113	1e-23	GK24149 [Drosophila willistoni] >gi|194165193|gb|EDW80094.1| GK24149 [Drosophila willistoni]
CL265.Contig3_CmRNA	1028	36	3.996	gi|195442748|ref|XP_002069108.1|	110	8e-23	GK24149 [Drosophila willistoni] >gi|194165193|gb|EDW80094.1| GK24149 [Drosophila willistoni]
CL2650.Contig1_CmRNA	369	19	5.8754	gi|345498302|ref|XP_003428200.1|	240	1e-62	PREDICTED: AP-1 complex subunit mu-1-like isoform 2 [Nasonia vitripennis]
CL2650.Contig2_CmRNA	1497	437	33.3099	gi|91093575|ref|XP_968639.1|	810	0	PREDICTED: similar to AGAP011374-PA [Tribolium castaneum]
CL2653.Contig1_CmRNA	593	98	18.8575	gi|158287449|ref|XP_309480.3|	144	2e-33	AGAP011169-PA [Anopheles gambiae str. PEST] >gi|157019656|gb|EAA05142.3| AGAP011169-PA [Anopheles gambiae str. PEST]
CL2655.Contig1_CmRNA	830	16	2.1997	gi|114050767|ref|NP_001040403.1|	269	1e-70	protein tyrosine phosphatase [Bombyx mori] >gi|95102766|gb|ABF51324.1| protein tyrosine phosphatase [Bombyx mori]
CL2655.Contig2_CmRNA	812	7	0.9837	gi|114050767|ref|NP_001040403.1|	269	9e-71	protein tyrosine phosphatase [Bombyx mori] >gi|95102766|gb|ABF51324.1| protein tyrosine phosphatase [Bombyx mori]
CL2659.Contig1_CmRNA	470	27	6.5551	gi|158186758|ref|NP_001103396.1|	318	5e-86	c-Jun NH2-terminal kinase [Bombyx mori] >gi|154816105|dbj|BAF75352.1| c-Jun NH2-terminal kinase [Bombyx mori]
CL266.Contig1_CmRNA	1033	89	9.8311	gi|160333138|ref|NP_001103795.1|	597	1e-169	very low-density lipoprotein receptor isoform 1 [Bombyx mori] >gi|95102594|gb|ABF51235.1| very low-density lipoprotein receptor precursor isoform 1 [Bombyx mori] >gi|308228544|gb|ADO24153.1| chitin deacetylase 1 [Bombyx mori]
CL266.Contig2_CmRNA	1015	9	1.0118	gi|160333140|ref|NP_001103796.1|	602	1e-170	very low-density lipoprotein receptor isoform 2 [Bombyx mori] >gi|95102596|gb|ABF51236.1| very low-density lipoprotein receptor precursor isoform 2 [Bombyx mori] >gi|308228546|gb|ADO24154.1| chitin deacetylase 2 [Bombyx mori]
CL2662.Contig1_CmRNA	1841	47	2.9131	gi|156255210|ref|NP_001095933.1|	363	2e-98	lactate dehydrogenase [Bombyx mori] >gi|151933948|gb|ABS18410.1| lactate dehydrogenase [Bombyx mori] >gi|164523643|gb|ABY60854.1| lactate dehydrogenase [Bombyx mori]
CL2662.Contig2_CmRNA	1670	30	2.0498	gi|156255210|ref|NP_001095933.1|	363	2e-98	lactate dehydrogenase [Bombyx mori] >gi|151933948|gb|ABS18410.1| lactate dehydrogenase [Bombyx mori] >gi|164523643|gb|ABY60854.1| lactate dehydrogenase [Bombyx mori]
CL2663.Contig1_CmRNA	1053	455	49.3056	gi|37983093|gb|AAR06266.1|	285	2e-75	peritrophic membrane chitin binding protein 2 [Trichoplusia ni]
CL2663.Contig2_CmRNA	1008	366	41.4318	gi|229424433|gb|ACQ65651.1|	299	2e-79	peritrophic membrane chitin binding protein [Loxostege sticticalis]
CL2664.Contig1_CmRNA	1469	68	5.282	gi|299930641|gb|ADJ58536.1|	744	0	seminal fluid protein HACP038 [Heliconius erato]
CL2664.Contig2_CmRNA	1381	2	0.1653	gi|299930641|gb|ADJ58536.1|	654	0	seminal fluid protein HACP038 [Heliconius erato]
CL2665.Contig1_CmRNA	1477	10	0.7726	gi|270297226|ref|NP_001161923.1|	261	8e-68	peritrophic matrix protein 1-C [Tribolium castaneum] >gi|268309030|gb|ACY95481.1| peritrophic matrix protein 1-C [Tribolium castaneum]
CL2665.Contig2_CmRNA	1427	4	0.3199	gi|270297226|ref|NP_001161923.1|	264	9e-69	peritrophic matrix protein 1-C [Tribolium castaneum] >gi|268309030|gb|ACY95481.1| peritrophic matrix protein 1-C [Tribolium castaneum]
CL267.Contig1_CmRNA	782	37	5.3989	gi|326632043|gb|ADZ99024.1|	194	3e-48	SOCS2-12 [Bombyx mori]
CL267.Contig2_CmRNA	503	13	2.9491	gi|326632043|gb|ADZ99024.1|	207	2e-52	SOCS2-12 [Bombyx mori]
CL2670.Contig1_CmRNA	1516	25	1.8817	gi|50979202|ref|NP_001003352.1|	67	2e-09	neurofilament heavy polypeptide [Canis lupus familiaris] >gi|24020878|gb|AAN40837.1|AF346625_1 heavy neurofilament protein [Canis lupus familiaris]
CL2670.Contig2_CmRNA	1495	8	0.6106	gi|291234532|ref|XP_002737205.1|	61.2	1e-07	PREDICTED: Antigen KI-67-like [Saccoglossus kowalevskii]
CL2673.Contig1_CmRNA	1232	252	23.3401	gi|345492906|ref|XP_003426952.1|	125	2e-42	PREDICTED: uncharacterized protein C1683.06c-like [Nasonia vitripennis]
CL2676.Contig1_CmRNA	791	28	4.0392	gi|307198754|gb|EFN79557.1|	332	1e-89	Armadillo segment polarity protein [Harpegnathos saltator]
CL2676.Contig2_CmRNA	758	37	5.5699	gi|37991668|dbj|BAD00045.1|	333	5e-90	armadillo protein [Gryllus bimaculatus]
CL268.Contig1_CmRNA	14487	34	0.2678	gi|168823429|ref|NP_001108348.1|	3370	0	kettin protein [Bombyx mori] >gi|18700457|dbj|BAB85196.1| BMKETTIN [Bombyx mori] >gi|22474512|dbj|BAC10617.1| KETTIN [Bombyx mori]
CL268.Contig2_CmRNA	14472	355	2.7991	gi|168823429|ref|NP_001108348.1|	3370	0	kettin protein [Bombyx mori] >gi|18700457|dbj|BAB85196.1| BMKETTIN [Bombyx mori] >gi|22474512|dbj|BAC10617.1| KETTIN [Bombyx mori]
CL268.Contig3_CmRNA	9717	139	1.6323	gi|168823429|ref|NP_001108348.1|	2278	0	kettin protein [Bombyx mori] >gi|18700457|dbj|BAB85196.1| BMKETTIN [Bombyx mori] >gi|22474512|dbj|BAC10617.1| KETTIN [Bombyx mori]
CL268.Contig4_CmRNA	9702	13	0.1529	gi|168823429|ref|NP_001108348.1|	2278	0	kettin protein [Bombyx mori] >gi|18700457|dbj|BAB85196.1| BMKETTIN [Bombyx mori] >gi|22474512|dbj|BAC10617.1| KETTIN [Bombyx mori]
CL268.Contig5_CmRNA	6823	1284	21.4735	gi|168823429|ref|NP_001108348.1|	3376	0	kettin protein [Bombyx mori] >gi|18700457|dbj|BAB85196.1| BMKETTIN [Bombyx mori] >gi|22474512|dbj|BAC10617.1| KETTIN [Bombyx mori]
CL2686.Contig1_CmRNA	1899	1199	72.0457	gi|340719469|ref|XP_003398176.1|	332	5e-89	PREDICTED: carbonyl reductase [NADPH] 1-like [Bombus terrestris]
CL2688.Contig1_CmRNA	843	287	38.8479	gi|158287631|ref|XP_309617.4|	125	3e-27	AGAP004065-PA [Anopheles gambiae str. PEST] >gi|157019515|gb|EAA05338.5| AGAP004065-PA [Anopheles gambiae str. PEST]
CL2689.Contig1_CmRNA	261	26	11.367	gi|170579958|ref|XP_001895056.1|	73.9	2e-12	Histidine-rich glycoprotein precursor [Brugia malayi]
CL269.Contig1_CmRNA	1381	113	9.3368	gi|556019|gb|AAC13648.1|	173	2e-41	gag protein [Bombyx mori]
CL269.Contig2_CmRNA	510	30	6.7122	gi|56798155|dbj|BAD82945.1|	64.7	2e-09	non-LTR retrotransposon R1Bmks ORF1 protein [Bombyx mori]
CL2690.Contig1_CmRNA	1027	773	85.8861	gi|114050941|ref|NP_001040329.1|	317	7e-85	receptor expression enhancing protein isoform 2 [Bombyx mori] >gi|87248617|gb|ABD36361.1| receptor expression enhancing protein isoform 2 [Bombyx mori]
CL2693.Contig1_CmRNA	1954	311	18.1614	gi|332027115|gb|EGI67211.1|	847	0	Amidophosphoribosyltransferase [Acromyrmex echinatior]
CL2693.Contig2_CmRNA	1095	1	0.1042	gi|332027115|gb|EGI67211.1|	470	1e-131	Amidophosphoribosyltransferase [Acromyrmex echinatior]
CL2695.Contig1_CmRNA	1683	1698	115.124	gi|255710339|gb|ACU30989.1|	125	5e-27	secreted protein member of chemokine-like factor super family [Ochlerotatus triseriatus]
CL2696.Contig1_CmRNA	420	17	4.6186	gi|170035717|ref|XP_001845714.1|	102	5e-21	DNA repair protein Rad21 [Culex quinquefasciatus] >gi|167878020|gb|EDS41403.1| DNA repair protein Rad21 [Culex quinquefasciatus]
CL2696.Contig2_CmRNA	375	9	2.7386	gi|170035717|ref|XP_001845714.1|	102	6e-21	DNA repair protein Rad21 [Culex quinquefasciatus] >gi|167878020|gb|EDS41403.1| DNA repair protein Rad21 [Culex quinquefasciatus]
CL2698.Contig1_CmRNA	900	63	7.9875	gi|189240806|ref|XP_001811380.1|	88.6	3e-16	PREDICTED: similar to AGAP005418-PA [Tribolium castaneum]
CL2698.Contig2_CmRNA	882	69	8.9268	gi|189240806|ref|XP_001811380.1|	90.5	9e-17	PREDICTED: similar to AGAP005418-PA [Tribolium castaneum]
CL2699.Contig1_CmRNA	287	12	4.771	gi|307192068|gb|EFN75427.1|	191	1e-47	Protein held out wings [Harpegnathos saltator]
CL2699.Contig2_CmRNA	868	13	1.709	gi|282392017|ref|NP_001164152.1|	383	1e-105	held out wings [Tribolium castaneum]
CL2699.Contig3_CmRNA	853	4	0.5351	gi|282392017|ref|NP_001164152.1|	385	1e-105	held out wings [Tribolium castaneum]
CL2700.Contig1_CmRNA	1340	247	21.0332	gi|2642506|gb|AAC47848.1|	59.3	4e-07	O1 [Plasmodium falciparum]
CL2700.Contig2_CmRNA	835	146	19.9517	gi|2642506|gb|AAC47848.1|	58.5	3e-07	O1 [Plasmodium falciparum]
CL2703.Contig1_CmRNA	341	138	46.1783	gi|301612549|ref|XP_002935775.1|	72	7e-12	PREDICTED: keratin, type II cytoskeletal 5-like [Xenopus (Silurana) tropicalis]
CL2705.Contig1_CmRNA	663	514	88.4633	gi|260908006|gb|ACX53802.1|	233	4e-60	hydroxybutyrate dehydrogenase [Heliothis virescens]
CL2711.Contig1_CmRNA	906	33	4.1562	gi|340728301|ref|XP_003402464.1|	361	3e-98	PREDICTED: microtubule-actin cross-linking factor 1-like [Bombus terrestris]
CL2711.Contig2_CmRNA	382	3	0.8961	gi|340728301|ref|XP_003402464.1|	83.6	2e-15	PREDICTED: microtubule-actin cross-linking factor 1-like [Bombus terrestris]
CL2717.Contig1_CmRNA	443	45	11.591	gi|157133978|ref|XP_001663102.1|	120	1e-26	malate synthase [Aedes aegypti] >gi|108881471|gb|EAT45696.1| malate synthase [Aedes aegypti]
CL2721.Contig1_CmRNA	747	43	6.5684	gi|151301088|ref|NP_001093078.1|	323	5e-87	ubiquinone biosynthesis protein COQ7-like protein [Bombyx mori] >gi|87248091|gb|ABD36098.1| ubiquinone biosynthesis protein COQ7-like protein [Bombyx mori]
CL2721.Contig2_CmRNA	683	15	2.506	gi|151301088|ref|NP_001093078.1|	323	4e-87	ubiquinone biosynthesis protein COQ7-like protein [Bombyx mori] >gi|87248091|gb|ABD36098.1| ubiquinone biosynthesis protein COQ7-like protein [Bombyx mori]
CL2726.Contig1_CmRNA	2309	133	6.5727	gi|290560808|ref|NP_001166736.1|	366	2e-99	cuticular protein RR-1 motif 12 [Bombyx mori]
CL2726.Contig2_CmRNA	2081	163	8.9378	gi|290560808|ref|NP_001166736.1|	427	1e-117	cuticular protein RR-1 motif 12 [Bombyx mori]
CL2726.Contig3_CmRNA	2345	555	27.0062	gi|290560808|ref|NP_001166736.1|	367	1e-99	cuticular protein RR-1 motif 12 [Bombyx mori]
CL2728.Contig1_CmRNA	411	31	8.6066	gi|345494041|ref|XP_001606007.2|	182	4e-45	PREDICTED: RNA-binding protein Musashi homolog Rbp6-like [Nasonia vitripennis]
CL2728.Contig2_CmRNA	256	3	1.3372	gi|345494041|ref|XP_001606007.2|	58.9	6e-08	PREDICTED: RNA-binding protein Musashi homolog Rbp6-like [Nasonia vitripennis]
CL2732.Contig1_CmRNA	876	48	6.2525	gi|195440088|ref|XP_002067887.1|	55.5	3e-06	GK24889 [Drosophila willistoni] >gi|194163972|gb|EDW78873.1| GK24889 [Drosophila willistoni]
CL2732.Contig2_CmRNA	1124	73	7.4109	gi|195440088|ref|XP_002067887.1|	55.5	5e-06	GK24889 [Drosophila willistoni] >gi|194163972|gb|EDW78873.1| GK24889 [Drosophila willistoni]
CL2733.Contig1_CmRNA	410	93	25.8829	gi|15418786|gb|AAK39637.1|	218	8e-56	iron regulatory protein 1 [Manduca sexta]
CL2735.Contig1_CmRNA	389	27	7.92	gi|195388362|ref|XP_002052849.1|	72	7e-12	GJ17784 [Drosophila virilis] >gi|194149306|gb|EDW65004.1| GJ17784 [Drosophila virilis]
CL2738.Contig1_CmRNA	840	167	22.6856	gi|114052272|ref|NP_001040465.1|	98.6	3e-19	tropomyosin-2 isoform 2 [Bombyx mori] >gi|95103002|gb|ABF51442.1| tropomyosin isoform 2 [Bombyx mori]
CL2738.Contig2_CmRNA	248	64	29.4471	gi|153792609|ref|NP_001093277.1|	154	1e-36	tropomyosin-2 isoform 4 [Bombyx mori] >gi|95103006|gb|ABF51444.1| tropomyosin isoform 4 [Bombyx mori]
CL2739.Contig1_CmRNA	989	17	1.9614	gi|114051339|ref|NP_001040374.1|	394	1e-108	Yipf6 protein [Bombyx mori] >gi|95102670|gb|ABF51273.1| Yipf6 protein [Bombyx mori]
CL2739.Contig2_CmRNA	893	36	4.6001	gi|114051339|ref|NP_001040374.1|	409	1e-113	Yipf6 protein [Bombyx mori] >gi|95102670|gb|ABF51273.1| Yipf6 protein [Bombyx mori]
CL274.Contig1_CmRNA	1088	11	1.1537	gi|87248535|gb|ABD36320.1|	468	1e-130	mitochondrial matrix protein p32 [Bombyx mori]
CL274.Contig2_CmRNA	1074	0	0	gi|87248535|gb|ABD36320.1|	468	1e-130	mitochondrial matrix protein p32 [Bombyx mori]
CL274.Contig3_CmRNA	810	3	0.4226	gi|114052587|ref|NP_001040258.1|	359	9e-98	mitochondrial matrix protein p33 [Bombyx mori] >gi|87248537|gb|ABD36321.1| mitochondrial matrix protein p33 [Bombyx mori]
CL274.Contig4_CmRNA	796	0	0	gi|114052587|ref|NP_001040258.1|	359	9e-98	mitochondrial matrix protein p33 [Bombyx mori] >gi|87248537|gb|ABD36321.1| mitochondrial matrix protein p33 [Bombyx mori]
CL2740.Contig1_CmRNA	563	14	2.8375	gi|157134729|ref|XP_001656413.1|	181	2e-44	tight junction protein [Aedes aegypti] >gi|108884290|gb|EAT48515.1| tight junction protein [Aedes aegypti]
CL2740.Contig2_CmRNA	547	71	14.811	gi|157134729|ref|XP_001656413.1|	112	6e-24	tight junction protein [Aedes aegypti] >gi|108884290|gb|EAT48515.1| tight junction protein [Aedes aegypti]
CL2741.Contig1_CmRNA	494	50	11.5493	gi|340710082|ref|XP_003393627.1|	281	1e-74	PREDICTED: serine/threonine-protein kinase minibrain-like [Bombus terrestris]
CL2741.Contig2_CmRNA	424	11	2.9603	gi|333469708|gb|EGK97379.1|	202	4e-51	AGAP002119-PD [Anopheles gambiae str. PEST]
CL2742.Contig1_CmRNA	836	45	6.1421	gi|194764141|ref|XP_001964190.1|	338	2e-91	GF21423 [Drosophila ananassae] >gi|190619115|gb|EDV34639.1| GF21423 [Drosophila ananassae]
CL2742.Contig2_CmRNA	866	69	9.0917	gi|194764141|ref|XP_001964190.1|	336	7e-91	GF21423 [Drosophila ananassae] >gi|190619115|gb|EDV34639.1| GF21423 [Drosophila ananassae]
CL2744.Contig1_CmRNA	1545	2015	148.82	gi|114052140|ref|NP_001040223.1|	733	0	ubiquitin conjugating enzyme E2 [Bombyx mori] >gi|87248433|gb|ABD36269.1| ubiquitin conjugating enzyme E2 [Bombyx mori]
CL2746.Contig1_CmRNA	1625	50	3.511	gi|13628721|sp|O76484.1|CSK2A_SPOFR	722	0	RecName: Full=Casein kinase II subunit alpha; Short=CK II subunit alpha >gi|3249055|gb|AAC24041.1| casein kinase II alpha subunit [Spodoptera frugiperda]
CL2746.Contig2_CmRNA	1518	3	0.2255	gi|13628721|sp|O76484.1|CSK2A_SPOFR	722	0	RecName: Full=Casein kinase II subunit alpha; Short=CK II subunit alpha >gi|3249055|gb|AAC24041.1| casein kinase II alpha subunit [Spodoptera frugiperda]
CL2748.Contig1_CmRNA	679	31	5.2096	gi|91076110|ref|XP_969015.1|	113	8e-24	PREDICTED: similar to synapse-associated protein [Tribolium castaneum]
CL2748.Contig2_CmRNA	565	29	5.8568	gi|91076110|ref|XP_969015.1|	106	5e-22	PREDICTED: similar to synapse-associated protein [Tribolium castaneum]
CL2749.Contig1_CmRNA	1613	309	21.8594	gi|307188142|gb|EFN72974.1|	704	0	Protein ariadne-2 [Camponotus floridanus]
CL275.Contig1_CmRNA	1839	885	54.913	gi|158294124|ref|XP_315409.2|	660	0	AGAP005400-PA [Anopheles gambiae str. PEST] >gi|157015419|gb|EAA10887.3| AGAP005400-PA [Anopheles gambiae str. PEST]
CL275.Contig2_CmRNA	1634	125	8.7291	gi|328786758|ref|XP_393694.4|	637	0	PREDICTED: four and a half LIM domains protein 2 [Apis mellifera]
CL2751.Contig1_CmRNA	754	19	2.8754	gi|115728588|ref|XP_780925.2|	68.6	3e-10	PREDICTED: similar to calmodulin 2 [Strongylocentrotus purpuratus] >gi|115960363|ref|XP_001196877.1| PREDICTED: similar to calmodulin 2 [Strongylocentrotus purpuratus]
CL2751.Contig2_CmRNA	710	65	10.4464	gi|115728588|ref|XP_780925.2|	68.6	2e-10	PREDICTED: similar to calmodulin 2 [Strongylocentrotus purpuratus] >gi|115960363|ref|XP_001196877.1| PREDICTED: similar to calmodulin 2 [Strongylocentrotus purpuratus]
CL2753.Contig1_CmRNA	3295	70	2.4241	gi|91089337|ref|XP_972494.1|	865	0	PREDICTED: similar to fascin [Tribolium castaneum]
CL2753.Contig2_CmRNA	3233	206	7.2707	gi|91089337|ref|XP_972494.1|	865	0	PREDICTED: similar to fascin [Tribolium castaneum]
CL2754.Contig1_CmRNA	685	105	17.4909	gi|195046414|ref|XP_001992148.1|	56.2	1e-06	GH24370 [Drosophila grimshawi] >gi|193892989|gb|EDV91855.1| GH24370 [Drosophila grimshawi]
CL2757.Contig1_CmRNA	371	14	4.3059	gi|190702438|gb|ACE75327.1|	179	2e-44	conserved hypothetical protein [Glyptapanteles indiensis]
CL2759.Contig1_CmRNA	2074	534	29.3796	gi|164683438|gb|ABY66383.1|	794	0	eukaryotic initiation factor 4A [Plutella xylostella]
CL2759.Contig2_CmRNA	1621	258	18.1614	gi|164683438|gb|ABY66383.1|	794	0	eukaryotic initiation factor 4A [Plutella xylostella]
CL2766.Contig1_CmRNA	2822	110	4.4478	gi|153792309|ref|NP_001093304.1|	716	0	pyruvate dehydrogenase [Bombyx mori] >gi|146738085|gb|ABQ42597.1| L(B002) [Bombyx mori]
CL2766.Contig2_CmRNA	2889	402	15.8779	gi|153792309|ref|NP_001093304.1|	716	0	pyruvate dehydrogenase [Bombyx mori] >gi|146738085|gb|ABQ42597.1| L(B002) [Bombyx mori]
CL2767.Contig1_CmRNA	877	474	61.6726	gi|114053035|ref|NP_001040501.1|	119	2e-25	legumaturain [Bombyx mori] >gi|95103152|gb|ABF51517.1| legumaturain [Bombyx mori]
CL2768.Contig1_CmRNA	1473	32	2.4789	gi|91089527|ref|XP_971048.1|	370	1e-100	PREDICTED: similar to GA14176-PA [Tribolium castaneum]
CL2768.Contig2_CmRNA	1359	33	2.7708	gi|91089527|ref|XP_971048.1|	389	1e-106	PREDICTED: similar to GA14176-PA [Tribolium castaneum]
CL2770.Contig1_CmRNA	906	2252	283.631	gi|307200174|gb|EFN80472.1|	512	1e-144	60S ribosomal protein L8 [Harpegnathos saltator] >gi|307212337|gb|EFN88141.1| 60S ribosomal protein L8 [Harpegnathos saltator]
CL2770.Contig2_CmRNA	570	1617	323.704	gi|307200174|gb|EFN80472.1|	347	2e-94	60S ribosomal protein L8 [Harpegnathos saltator] >gi|307212337|gb|EFN88141.1| 60S ribosomal protein L8 [Harpegnathos saltator]
CL2770.Contig3_CmRNA	886	11570	1490.09	gi|268306420|gb|ACY95331.1|	525	1e-147	ribosomal protein L8 [Manduca sexta]
CL2775.Contig1_CmRNA	989	14	1.6153	gi|157133710|ref|XP_001662976.1|	336	8e-91	serine/threonine-protein kinase [Aedes aegypti] >gi|108881481|gb|EAT45706.1| serine/threonine-protein kinase [Aedes aegypti]
CL2775.Contig2_CmRNA	963	6	0.7109	gi|189240435|ref|XP_971928.2|	293	8e-78	PREDICTED: similar to serine/threonine-protein kinase [Tribolium castaneum]
CL2776.Contig1_CmRNA	1339	79	6.7322	gi|291239739|ref|XP_002739776.1|	177	1e-42	PREDICTED: Mitochondrial import receptor subunit TOM20 homolog [Saccoglossus kowalevskii]
CL2776.Contig2_CmRNA	1310	102	8.8847	gi|291239739|ref|XP_002739776.1|	177	1e-42	PREDICTED: Mitochondrial import receptor subunit TOM20 homolog [Saccoglossus kowalevskii]
CL2777.Contig1_CmRNA	761	25	3.7486	gi|333469022|gb|EAA09199.6|	69.7	1e-10	AGAP004367-PA [Anopheles gambiae str. PEST]
CL2778.Contig1_CmRNA	1938	305	17.9581	gi|160333138|ref|NP_001103795.1|	1078	0	very low-density lipoprotein receptor isoform 1 [Bombyx mori] >gi|95102594|gb|ABF51235.1| very low-density lipoprotein receptor precursor isoform 1 [Bombyx mori] >gi|308228544|gb|ADO24153.1| chitin deacetylase 1 [Bombyx mori]
CL2778.Contig2_CmRNA	1920	236	14.0257	gi|183979231|dbj|BAG30777.1|	1081	0	chitin binding protein [Papilio xuthus]
CL278.Contig1_CmRNA	3090	1162	42.9103	gi|324120540|dbj|BAJ78661.1|	1721	0	RNA polymerase II largest subunit [Teleogryllus emma]
CL278.Contig2_CmRNA	323	24	8.4786	gi|307198840|gb|EFN79616.1|	202	5e-51	DNA-directed RNA polymerase II subunit RPB1 [Harpegnathos saltator]
CL2780.Contig1_CmRNA	575	1370	271.873	gi|156096593|ref|XP_001614330.1|	77.8	3e-13	Pv-fam-h protein [Plasmodium vivax SaI-1] >gi|148803204|gb|EDL44603.1| Pv-fam-h protein [Plasmodium vivax]
CL2780.Contig2_CmRNA	308	883	327.132	gi|156096593|ref|XP_001614330.1|	77	2e-13	Pv-fam-h protein [Plasmodium vivax SaI-1] >gi|148803204|gb|EDL44603.1| Pv-fam-h protein [Plasmodium vivax]
CL2781.Contig1_CmRNA	431	40	10.59	gi|345487967|ref|XP_003425801.1|	229	3e-59	PREDICTED: ubiquitin-conjugating enzyme E2 H-like [Nasonia vitripennis] >gi|345487969|ref|XP_003425802.1| PREDICTED: ubiquitin-conjugating enzyme E2 H-like [Nasonia vitripennis] >gi|345487971|ref|XP_003425803.1| PREDICTED: ubiquitin-conjugating enzyme E2 H-like [Nasonia vitripennis]
CL2781.Contig2_CmRNA	217	2	1.0517	gi|345487967|ref|XP_003425801.1|	116	3e-25	PREDICTED: ubiquitin-conjugating enzyme E2 H-like [Nasonia vitripennis] >gi|345487969|ref|XP_003425802.1| PREDICTED: ubiquitin-conjugating enzyme E2 H-like [Nasonia vitripennis] >gi|345487971|ref|XP_003425803.1| PREDICTED: ubiquitin-conjugating enzyme E2 H-like [Nasonia vitripennis]
CL2783.Contig1_CmRNA	384	9	2.6744	gi|345498054|ref|XP_001600523.2|	202	5e-51	PREDICTED: probable multidrug resistance-associated protein lethal(2)03659-like [Nasonia vitripennis]
CL2785.Contig1_CmRNA	501	66	15.0321	gi|190702232|gb|ACE75130.1|	103	3e-21	conserved hypothetical protein [Glyptapanteles flavicoxis]
CL2792.Contig2_CmRNA	2602	413	18.1116	gi|324035678|gb|ADY17534.1|	590	1e-166	UDP-glucosyltransferase [Bombyx mori]
CL2792.Contig4_CmRNA	1760	307	19.904	gi|215820602|ref|NP_001135960.1|	586	1e-165	uridine diphosphate glucosyltransferase [Bombyx mori] >gi|213494483|gb|ACJ48963.1| uridine diphosphate glucosyltransferase [Bombyx mori]
CL2795.Contig1_CmRNA	403	17	4.8135	gi|6164595|gb|AAF04457.1|AF078161_1	188	7e-47	lacunin [Manduca sexta]
CL2795.Contig2_CmRNA	306	17	6.3393	gi|195574509|ref|XP_002105231.1|	120	1e-26	GD18032 [Drosophila simulans] >gi|194201158|gb|EDX14734.1| GD18032 [Drosophila simulans]
CL2797.Contig1_CmRNA	588	49	9.5089	gi|157109807|ref|XP_001650833.1|	130	3e-29	mixed-lineage leukemia protein, mll [Aedes aegypti] >gi|108878935|gb|EAT43160.1| mixed-lineage leukemia protein, mll [Aedes aegypti]
CL2799.Contig1_CmRNA	732	363	56.586	gi|114052615|ref|NP_001040547.1|	293	6e-78	nonmuscle myosin essential light chain [Bombyx mori] >gi|95103128|gb|ABF51505.1| nonmuscle myosin essential light chain [Bombyx mori] >gi|98990267|gb|ABF60229.1| myosin II essential light chain [Bombyx mori] >gi|225346699|gb|ACN86372.1| myosin light chain 1 protein [Bombyx mandarina]
CL2799.Contig2_CmRNA	606	96	18.0764	gi|114052615|ref|NP_001040547.1|	273	3e-72	nonmuscle myosin essential light chain [Bombyx mori] >gi|95103128|gb|ABF51505.1| nonmuscle myosin essential light chain [Bombyx mori] >gi|98990267|gb|ABF60229.1| myosin II essential light chain [Bombyx mori] >gi|225346699|gb|ACN86372.1| myosin light chain 1 protein [Bombyx mandarina]
CL2806.Contig1_CmRNA	1485	9	0.6916	gi|328786374|ref|XP_392229.4|	329	1e-100	PREDICTED: epidermal growth factor receptor kinase substrate 8-like protein 1-like [Apis mellifera]
CL2806.Contig2_CmRNA	1424	8	0.6411	gi|328786374|ref|XP_392229.4|	384	1e-105	PREDICTED: epidermal growth factor receptor kinase substrate 8-like protein 1-like [Apis mellifera]
CL2807.Contig1_CmRNA	277	19	7.8269	gi|34099638|gb|AAQ57129.1|	58.9	6e-08	endonuclease and reverse transcriptase-like protein [Bombyx mori]
CL2808.Contig1_CmRNA	216	160	84.524	gi|41016819|sp|P83653.1|ALO3_ACRLO	54.7	1e-06	RecName: Full=Antimicrobial peptide Alo-3 >gi|159162870|pdb|1Q3J|A Chain A, Solution Structure Of Alo3: A New Knottin-Type Antifungal Peptide From The Insect Acrocinus Longimanus
CL2808.Contig2_CmRNA	201	108	61.3114	gi|41016819|sp|P83653.1|ALO3_ACRLO	54.7	1e-06	RecName: Full=Antimicrobial peptide Alo-3 >gi|159162870|pdb|1Q3J|A Chain A, Solution Structure Of Alo3: A New Knottin-Type Antifungal Peptide From The Insect Acrocinus Longimanus
CL281.Contig1_CmRNA	364	15	4.7022	gi|156550331|ref|XP_001602261.1|	133	2e-30	PREDICTED: protein MEF2BNB homolog [Nasonia vitripennis]
CL281.Contig2_CmRNA	346	3	0.9894	gi|156550331|ref|XP_001602261.1|	133	2e-30	PREDICTED: protein MEF2BNB homolog [Nasonia vitripennis]
CL2812.Contig1_CmRNA	420	2	0.5434	gi|158300042|ref|XP_320050.4|	114	2e-24	AGAP009258-PA [Anopheles gambiae str. PEST] >gi|157013810|gb|EAA15075.4| AGAP009258-PA [Anopheles gambiae str. PEST]
CL2812.Contig2_CmRNA	418	4	1.0919	gi|158300042|ref|XP_320050.4|	114	2e-24	AGAP009258-PA [Anopheles gambiae str. PEST] >gi|157013810|gb|EAA15075.4| AGAP009258-PA [Anopheles gambiae str. PEST]
CL2825.Contig1_CmRNA	1028	76	8.436	gi|295424202|ref|NP_001171330.1|	523	1e-147	ced-6 protein [Bombyx mori] >gi|293330270|dbj|BAJ04619.1| ced-6 protein [Bombyx mori]
CL2825.Contig2_CmRNA	1109	73	7.5111	gi|295424202|ref|NP_001171330.1|	523	1e-147	ced-6 protein [Bombyx mori] >gi|293330270|dbj|BAJ04619.1| ced-6 protein [Bombyx mori]
CL2829.Contig1_CmRNA	1028	1176	130.535	gi|46396271|sp|P83632.1|P27K_GALME	49.3	2e-07	RecName: Full=27 kDa hemolymph protein; AltName: Full=P27K; Short=27k; Flags: Precursor >gi|40644061|emb|CAE02611.1| 27k hemolymph protein [Galleria mellonella]
CL283.Contig1_CmRNA	823	39	5.4073	gi|307177097|gb|EFN66352.1|	308	2e-82	Prolyl endopeptidase [Camponotus floridanus]
CL283.Contig2_CmRNA	772	108	15.9632	gi|307177097|gb|EFN66352.1|	308	2e-82	Prolyl endopeptidase [Camponotus floridanus]
CL2839.Contig1_CmRNA	243	31	14.5569	gi|332021877|gb|EGI62213.1|	62	8e-09	Heterogeneous nuclear ribonucleoprotein U-like protein 1 [Acromyrmex echinatior]
CL2842.Contig1_CmRNA	833	75	10.2738	gi|307189058|gb|EFN73545.1|	119	2e-25	UPF0439 protein C9orf30-like protein [Camponotus floridanus]
CL2844.Contig1_CmRNA	429	46	12.2353	gi|270006457|gb|EFA02905.1|	103	2e-21	centrin 2 [Tribolium castaneum]
CL2844.Contig2_CmRNA	315	30	10.8674	gi|270006457|gb|EFA02905.1|	106	3e-22	centrin 2 [Tribolium castaneum]
CL2845.Contig1_CmRNA	1519	539	40.4897	gi|296427831|gb|ADH16747.1|	560	1e-158	flavin-dependent monooxygenase FMO1B [Bombyx mori]
CL2846.Contig1_CmRNA	518	21	4.626	gi|194753806|ref|XP_001959196.1|	59.3	7e-08	GF12180 [Drosophila ananassae] >gi|190620494|gb|EDV36018.1| GF12180 [Drosophila ananassae]
CL2846.Contig2_CmRNA	418	11	3.0028	gi|194753806|ref|XP_001959196.1|	59.3	5e-08	GF12180 [Drosophila ananassae] >gi|190620494|gb|EDV36018.1| GF12180 [Drosophila ananassae]
CL2847.Contig1_CmRNA	216	14	7.3958	gi|238859529|ref|NP_001154967.1|	94.4	1e-18	methyltransferase-like protein 20 [Danio rerio] >gi|206558236|sp|A3KP85.2|MET20_DANRE RecName: Full=Methyltransferase-like protein 20
CL2848.Contig1_CmRNA	620	108	19.8768	gi|195389777|ref|XP_002053550.1|	159	6e-38	GJ23290 [Drosophila virilis] >gi|194151636|gb|EDW67070.1| GJ23290 [Drosophila virilis]
CL2848.Contig2_CmRNA	377	4	1.2107	gi|195389777|ref|XP_002053550.1|	82	7e-15	GJ23290 [Drosophila virilis] >gi|194151636|gb|EDW67070.1| GJ23290 [Drosophila virilis]
CL285.Contig1_CmRNA	359	11	3.4963	gi|194895048|ref|XP_001978172.1|	54.3	2e-06	GG17845 [Drosophila erecta] >gi|190649821|gb|EDV47099.1| GG17845 [Drosophila erecta]
CL2850.Contig1_CmRNA	474	73	17.5735	gi|340728686|ref|XP_003402649.1|	304	9e-82	PREDICTED: s-phase kinase-associated protein 1-like [Bombus terrestris]
CL2850.Contig2_CmRNA	714	1055	168.604	gi|114052370|ref|NP_001040518.1|	322	1e-86	S-phase kinase-associated protein [Bombyx mori] >gi|95102716|gb|ABF51299.1| S-phase kinase-associated protein [Bombyx mori]
CL2856.Contig1_CmRNA	417	52	14.2292	gi|307186847|gb|EFN72264.1|	72.8	4e-12	Limulus clotting factor C [Camponotus floridanus]
CL2856.Contig2_CmRNA	372	26	7.9752	gi|307199615|gb|EFN80172.1|	73.2	3e-12	Limulus clotting factor C [Harpegnathos saltator]
CL2857.Contig1_CmRNA	1833	169	10.5205	gi|239790127|dbj|BAH71646.1|	233	2e-59	ACYPI009202 [Acyrthosiphon pisum]
CL2857.Contig2_CmRNA	1815	267	16.786	gi|239790127|dbj|BAH71646.1|	233	2e-59	ACYPI009202 [Acyrthosiphon pisum]
CL2859.Contig1_CmRNA	292	37	14.4588	gi|260907890|gb|ACX53746.1|	95.9	5e-19	carbonyl reductase [Heliothis virescens]
CL2859.Contig2_CmRNA	231	21	10.3734	gi|260907890|gb|ACX53746.1|	74.7	1e-12	carbonyl reductase [Heliothis virescens]
CL286.Contig1_CmRNA	742	3	0.4614	gi|260657054|gb|ACX47897.1|	357	3e-97	glutathione S-transferase [Amyelois transitella]
CL286.Contig2_CmRNA	706	3	0.4849	gi|260657054|gb|ACX47897.1|	363	3e-99	glutathione S-transferase [Amyelois transitella]
CL2862.Contig1_CmRNA	386	66	19.5106	gi|170036539|ref|XP_001846121.1|	127	2e-28	lethal 87Df [Culex quinquefasciatus] >gi|167879189|gb|EDS42572.1| lethal 87Df [Culex quinquefasciatus]
CL2863.Contig1_CmRNA	1667	54	3.6963	gi|340721561|ref|XP_003399187.1|	296	2e-78	PREDICTED: alaserpin-like [Bombus terrestris]
CL2863.Contig2_CmRNA	1445	83	6.5543	gi|340721561|ref|XP_003399187.1|	302	3e-80	PREDICTED: alaserpin-like [Bombus terrestris]
CL2864.Contig1_CmRNA	1021	11	1.2294	gi|258596917|ref|XP_001349654.2|	55.1	5e-06	rhoptry neck protein 6 [Plasmodium falciparum 3D7] >gi|254688479|gb|AAC71925.3| rhoptry neck protein 6 [Plasmodium falciparum 3D7]
CL2864.Contig2_CmRNA	997	4	0.4578	gi|154422434|ref|XP_001584229.1|	55.5	4e-06	hypothetical protein [Trichomonas vaginalis G3] >gi|121918475|gb|EAY23243.1| hypothetical protein TVAG_185500 [Trichomonas vaginalis G3]
CL2865.Contig1_CmRNA	881	135	17.4852	gi|239799436|dbj|BAH70638.1|	62.8	2e-08	ACYPI008743 [Acyrthosiphon pisum]
CL2865.Contig2_CmRNA	572	16	3.1918	gi|332018854|gb|EGI59410.1|	84.3	3e-15	hypothetical protein G5I_12447 [Acromyrmex echinatior]
CL2866.Contig1_CmRNA	558	7	1.4315	gi|332031064|gb|EGI70650.1|	155	1e-36	Gamma-soluble NSF attachment protein [Acromyrmex echinatior]
CL2866.Contig2_CmRNA	275	2	0.8299	gi|340722476|ref|XP_003399631.1|	110	2e-23	PREDICTED: something about silencing protein 10-like [Bombus terrestris]
CL2869.Contig1_CmRNA	220	24	12.4481	gi|321455306|gb|EFX66443.1|	54.3	2e-06	hypothetical protein DAPPUDRAFT_332203 [Daphnia pulex]
CL287.Contig1_CmRNA	461	9	2.2277	gi|340727473|ref|XP_003402068.1|	125	7e-28	PREDICTED: trafficking kinesin-binding protein milt-like [Bombus terrestris]
CL2871.Contig1_CmRNA	533	14	2.9972	gi|222143558|dbj|BAH19308.1|	259	4e-68	arginase [Bombyx mori] >gi|297591799|dbj|BAJ09215.1| arginase [Bombyx mori]
CL2871.Contig2_CmRNA	1218	297	27.8242	gi|222143558|dbj|BAH19308.1|	541	1e-152	arginase [Bombyx mori] >gi|297591799|dbj|BAJ09215.1| arginase [Bombyx mori]
CL2872.Contig1_CmRNA	915	6306	786.405	gi|345482620|ref|XP_001607871.2|	257	4e-67	PREDICTED: chymotrypsin-2 [Nasonia vitripennis]
CL2873.Contig1_CmRNA	560	20	4.0753	gi|7677032|gb|AAF66996.1|AF132032_1	265	1e-69	timeless [Antheraea pernyi]
CL2873.Contig2_CmRNA	386	7	2.0693	gi|7677032|gb|AAF66996.1|AF132032_1	162	5e-39	timeless [Antheraea pernyi]
CL2874.Contig1_CmRNA	619	42	7.7423	gi|86515328|ref|NP_001034489.1|	340	2e-92	homothorax [Tribolium castaneum] >gi|38490517|emb|CAD57735.1| homothorax [Tribolium castaneum]
CL2874.Contig2_CmRNA	462	3	0.741	gi|86515328|ref|NP_001034489.1|	248	7e-65	homothorax [Tribolium castaneum] >gi|38490517|emb|CAD57735.1| homothorax [Tribolium castaneum]
CL2876.Contig1_CmRNA	909	208	26.1104	gi|340709917|ref|XP_003393546.1|	244	3e-63	PREDICTED: LOW QUALITY PROTEIN: BUD13 homolog [Bombus terrestris]
CL288.Contig1_CmRNA	216	6	3.1696	gi|170048253|ref|XP_001851692.1|	105	8e-22	glutathione synthetase [Culex quinquefasciatus] >gi|167870376|gb|EDS33759.1| glutathione synthetase [Culex quinquefasciatus]
CL2880.Contig1_CmRNA	539	63	13.3372	gi|194869591|ref|XP_001972481.1|	267	2e-70	GG13860 [Drosophila erecta] >gi|195493707|ref|XP_002094531.1| GE20153 [Drosophila yakuba] >gi|190654264|gb|EDV51507.1| GG13860 [Drosophila erecta] >gi|194180632|gb|EDW94243.1| GE20153 [Drosophila yakuba]
CL2881.Contig1_CmRNA	410	23	6.4011	gi|324120660|dbj|BAJ78721.1|	274	7e-73	RNA polymerase II second largest subunit [Vespa analis insularis]
CL2881.Contig2_CmRNA	1868	559	34.1467	gi|324120674|dbj|BAJ78728.1|	1254	0	RNA polymerase II second largest subunit [Papilio polytes]
CL2881.Contig3_CmRNA	425	18	4.8328	gi|332022245|gb|EGI62560.1|	296	2e-79	DNA-directed RNA polymerase II subunit RPB2 [Acromyrmex echinatior]
CL2882.Contig1_CmRNA	1570	57	4.1428	gi|195447664|ref|XP_002071315.1|	318	4e-85	GK25724 [Drosophila willistoni] >gi|194167400|gb|EDW82301.1| GK25724 [Drosophila willistoni]
CL2882.Contig2_CmRNA	1465	52	4.0502	gi|195447664|ref|XP_002071315.1|	312	2e-83	GK25724 [Drosophila willistoni] >gi|194167400|gb|EDW82301.1| GK25724 [Drosophila willistoni]
CL2883.Contig1_CmRNA	1469	956	74.2591	gi|163838674|ref|NP_001106217.1|	788	0	eukaryotic initiation factor 4A-III [Bombyx mori] >gi|110376569|gb|ABG73410.1| eIF4AIII protein [Bombyx mori]
CL2883.Contig2_CmRNA	269	36	15.2709	gi|340714648|ref|XP_003395838.1|	185	4e-46	PREDICTED: eukaryotic initiation factor 4A-III-like [Bombus terrestris]
CL2883.Contig3_CmRNA	456	36	9.0085	gi|340714648|ref|XP_003395838.1|	294	9e-79	PREDICTED: eukaryotic initiation factor 4A-III-like [Bombus terrestris]
CL2884.Contig1_CmRNA	399	24	6.8636	gi|117935434|gb|ABK57058.1|	55.1	9e-07	IP02163p [Drosophila melanogaster]
CL2884.Contig2_CmRNA	375	70	21.3	gi|117935434|gb|ABK57058.1|	55.1	9e-07	IP02163p [Drosophila melanogaster]
CL2886.Contig1_CmRNA	1543	16	1.1832	gi|340727873|ref|XP_003402259.1|	297	8e-79	PREDICTED: cell division cycle and apoptosis regulator protein 1-like [Bombus terrestris]
CL2886.Contig2_CmRNA	1463	47	3.6658	gi|340727873|ref|XP_003402259.1|	297	8e-79	PREDICTED: cell division cycle and apoptosis regulator protein 1-like [Bombus terrestris]
CL2887.Contig1_CmRNA	1832	236	14.6994	gi|114051417|ref|NP_001040314.1|	697	0	DNA-damage inducible protein [Bombyx mori] >gi|87248309|gb|ABD36207.1| DNA-damage inducible protein [Bombyx mori]
CL2887.Contig2_CmRNA	1419	77	6.1919	gi|114051417|ref|NP_001040314.1|	708	0	DNA-damage inducible protein [Bombyx mori] >gi|87248309|gb|ABD36207.1| DNA-damage inducible protein [Bombyx mori]
CL2887.Contig3_CmRNA	387	15	4.4228	gi|307191967|gb|EFN75357.1|	231	7e-60	Protein DDI1-like protein 2 [Harpegnathos saltator]
CL2892.Contig1_CmRNA	2054	998	55.4426	gi|46403173|gb|AAS92609.1|	607	1e-172	vrille [Antheraea pernyi]
CL2892.Contig2_CmRNA	977	17	1.9855	gi|46403173|gb|AAS92609.1|	569	1e-161	vrille [Antheraea pernyi]
CL2893.Contig1_CmRNA	438	862	224.567	gi|6560691|gb|AAF16723.1|AF117601_1	136	2e-31	putative cuticle protein [Manduca sexta] >gi|28261395|gb|AAO32819.1| putative cuticle protein [Manduca sexta]
CL2894.Contig1_CmRNA	754	18	2.724	gi|261245093|ref|NP_001159616.1|	323	4e-87	heterochromatin protein 1beta-like protein [Bombyx mori] >gi|258546544|dbj|BAI39587.1| heterochromatin protein 1beta-like protein [Bombyx mori]
CL2894.Contig2_CmRNA	740	8	1.2336	gi|261245093|ref|NP_001159616.1|	323	3e-87	heterochromatin protein 1beta-like protein [Bombyx mori] >gi|258546544|dbj|BAI39587.1| heterochromatin protein 1beta-like protein [Bombyx mori]
CL2895.Contig1_CmRNA	737	74	11.4572	gi|328777153|ref|XP_001120676.2|	219	9e-56	PREDICTED: LOW QUALITY PROTEIN: endocuticle structural glycoprotein SgAbd-1 [Apis mellifera]
CL2895.Contig2_CmRNA	634	200	35.996	gi|328777153|ref|XP_001120676.2|	219	7e-56	PREDICTED: LOW QUALITY PROTEIN: endocuticle structural glycoprotein SgAbd-1 [Apis mellifera]
CL2896.Contig1_CmRNA	600	125	23.7724	gi|156541194|ref|XP_001599545.1|	214	2e-54	PREDICTED: pre-mRNA-splicing factor SLU7-like [Nasonia vitripennis]
CL2897.Contig1_CmRNA	1082	9	0.9491	gi|328790407|ref|XP_395314.4|	515	1e-144	PREDICTED: probable cytosolic iron-sulfur protein assembly protein Ciao1 [Apis mellifera]
CL2897.Contig2_CmRNA	1049	7	0.7614	gi|328790407|ref|XP_395314.4|	515	1e-144	PREDICTED: probable cytosolic iron-sulfur protein assembly protein Ciao1 [Apis mellifera]
CL2898.Contig1_CmRNA	1065	55	5.8929	gi|161076970|ref|NP_001097183.1|	303	7e-81	sickie, isoform D [Drosophila melanogaster] >gi|157400188|gb|AAF53856.3| sickie, isoform D [Drosophila melanogaster]
CL2898.Contig2_CmRNA	860	11	1.4595	gi|281365233|ref|NP_610011.2|	251	4e-65	sickie, isoform E [Drosophila melanogaster] >gi|272407110|gb|AAF53855.2| sickie, isoform E [Drosophila melanogaster]
CL29.Contig1_CmRNA	701	88	14.3245	gi|41023291|emb|CAA30394.2|	105	2e-21	salivary proline-rich protein [Homo sapiens]
CL2900.Contig1_CmRNA	210	9	4.8903	gi|298204367|gb|ADI61832.1|	85.1	8e-16	endonuclease-reverse transcriptase [Bombyx mori]
CL2900.Contig2_CmRNA	3047	852	31.9066	gi|298204337|gb|ADI61817.1|	620	0	endonuclease-reverse transcriptase [Bombyx mori]
CL2900.Contig3_CmRNA	342	14	4.6711	gi|298204367|gb|ADI61832.1|	122	6e-27	endonuclease-reverse transcriptase [Bombyx mori]
CL2901.Contig1_CmRNA	2207	44219	2286.23	gi|32264609|gb|AAP78751.1|	167	2e-39	Ac1147 [Rattus norvegicus] >gi|32492558|gb|AAP85367.1| Aa1011 [Rattus norvegicus] >gi|32492570|gb|AAP85373.1| Aa1262 [Rattus norvegicus] >gi|33086544|gb|AAP92584.1| Ab2-057 [Rattus norvegicus]
CL2904.Contig1_CmRNA	289	7	2.7638	gi|332018769|gb|EGI59334.1|	177	1e-43	Tankyrase-1 [Acromyrmex echinatior]
CL2904.Contig2_CmRNA	254	1	0.4492	gi|307212146|gb|EFN88000.1|	122	1e-32	Tankyrase-1 [Harpegnathos saltator]
CL2905.Contig1_CmRNA	794	81	11.6407	gi|158287621|ref|XP_309608.4|	137	5e-31	AGAP004055-PA [Anopheles gambiae str. PEST] >gi|157019510|gb|EAA05341.5| AGAP004055-PA [Anopheles gambiae str. PEST] >gi|333466611|gb|EGK96314.1| AGAP004055-PB [Anopheles gambiae str. PEST]
CL2905.Contig2_CmRNA	599	143	27.241	gi|158287621|ref|XP_309608.4|	137	3e-31	AGAP004055-PA [Anopheles gambiae str. PEST] >gi|157019510|gb|EAA05341.5| AGAP004055-PA [Anopheles gambiae str. PEST] >gi|333466611|gb|EGK96314.1| AGAP004055-PB [Anopheles gambiae str. PEST]
CL2908.Contig1_CmRNA	496	18	4.141	gi|194751089|ref|XP_001957859.1|	77	3e-13	GF10625 [Drosophila ananassae] >gi|190625141|gb|EDV40665.1| GF10625 [Drosophila ananassae]
CL2909.Contig2_CmRNA	1062	17	1.8266	gi|183396316|gb|ACC62028.1|	54.3	9e-06	mucin-like protein [Cryptosporidium hominis]
CL291.Contig1_CmRNA	866	191	25.1669	gi|198468335|ref|XP_002134007.1|	413	1e-114	GA28567 [Drosophila pseudoobscura pseudoobscura] >gi|198146366|gb|EDY72634.1| GA28567 [Drosophila pseudoobscura pseudoobscura]
CL2911.Contig1_CmRNA	392	13	3.7842	gi|281203888|gb|EFA78084.1|	249	3e-65	RNA polymerase II largest subunit [Polysphondylium pallidum PN500]
CL2911.Contig2_CmRNA	350	6	1.9561	gi|281203888|gb|EFA78084.1|	223	2e-57	RNA polymerase II largest subunit [Polysphondylium pallidum PN500]
CL2915.Contig1_CmRNA	963	160	18.9586	gi|307202009|gb|EFN81574.1|	455	1e-126	Probable ATP-dependent RNA helicase DDX17 [Harpegnathos saltator]
CL2918.Contig1_CmRNA	1185	439	42.2727	gi|328778791|ref|XP_003249547.1|	54.7	8e-06	PREDICTED: hypothetical protein LOC100577162 [Apis mellifera]
CL292.Contig1_CmRNA	291	5	1.9606	gi|149412200|ref|XP_001509484.1|	58.2	1e-07	PREDICTED: putative methyltransferase NSUN6 [Ornithorhynchus anatinus]
CL2920.Contig1_CmRNA	561	13	2.6442	gi|333468190|gb|EGK96863.1|	157	3e-37	AGAP002541-PB [Anopheles gambiae str. PEST]
CL2920.Contig2_CmRNA	453	6	1.5114	gi|333468190|gb|EGK96863.1|	130	2e-29	AGAP002541-PB [Anopheles gambiae str. PEST]
CL2923.Contig1_CmRNA	658	79	13.6998	gi|304421468|gb|ADM32533.1|	114	4e-24	TNFSF5 [Bombyx mori]
CL2928.Contig1_CmRNA	263	21	9.1112	gi|169234692|ref|NP_001108467.1|	128	7e-29	projectin-like protein [Bombyx mori] >gi|18700455|dbj|BAB85195.1| projectin-like protein [Bombyx mori] >gi|22474511|dbj|BAC10616.1| projectin-like protein [Bombyx mori]
CL2928.Contig2_CmRNA	224	2	1.0188	gi|169234692|ref|NP_001108467.1|	106	3e-22	projectin-like protein [Bombyx mori] >gi|18700455|dbj|BAB85195.1| projectin-like protein [Bombyx mori] >gi|22474511|dbj|BAC10616.1| projectin-like protein [Bombyx mori]
CL2929.Contig1_CmRNA	614	66	12.2656	gi|340710082|ref|XP_003393627.1|	385	1e-106	PREDICTED: serine/threonine-protein kinase minibrain-like [Bombus terrestris]
CL2929.Contig2_CmRNA	307	24	8.9204	gi|340710082|ref|XP_003393627.1|	211	6e-54	PREDICTED: serine/threonine-protein kinase minibrain-like [Bombus terrestris]
CL2931.Contig2_CmRNA	995	138	15.8259	gi|237836045|ref|XP_002367320.1|	54.3	8e-06	hypothetical protein TGME49_049880 [Toxoplasma gondii ME49] >gi|211964984|gb|EEB00180.1| hypothetical protein TGME49_049880 [Toxoplasma gondii ME49] >gi|221505999|gb|EEE31634.1| conserved hypothetical protein [Toxoplasma gondii VEG]
CL2933.Contig1_CmRNA	516	35	7.7398	gi|332026895|gb|EGI66996.1|	75.9	7e-13	Heterogeneous nuclear ribonucleoprotein Q [Acromyrmex echinatior]
CL2933.Contig2_CmRNA	270	18	7.6072	gi|345481380|ref|XP_001602182.2|	78.6	8e-14	PREDICTED: heterogeneous nuclear ribonucleoprotein Q-like, partial [Nasonia vitripennis]
CL2934.Contig1_CmRNA	769	164	24.335	gi|308512721|gb|ADO33014.1|	132	2e-29	fatbody protein 3Rev-G1 [Biston betularia]
CL2934.Contig2_CmRNA	687	98	16.2773	gi|308512721|gb|ADO33014.1|	132	2e-29	fatbody protein 3Rev-G1 [Biston betularia]
CL2934.Contig3_CmRNA	634	41	7.3792	gi|308512721|gb|ADO33014.1|	132	1e-29	fatbody protein 3Rev-G1 [Biston betularia]
CL2937.Contig1_CmRNA	2821	1813	73.3345	gi|161076893|ref|NP_001097157.1|	206	4e-51	CG6043, isoform G [Drosophila melanogaster] >gi|157400155|gb|ABV53677.1| CG6043, isoform G [Drosophila melanogaster]
CL2940.Contig1_CmRNA	930	26	3.1901	gi|71666350|ref|XP_820135.1|	83.2	2e-14	trans-sialidase [Trypanosoma cruzi strain CL Brener]
CL2940.Contig2_CmRNA	928	4	0.4918	gi|71666350|ref|XP_820135.1|	83.2	2e-14	trans-sialidase [Trypanosoma cruzi strain CL Brener]
CL2943.Contig1_CmRNA	913	87	10.8733	gi|156545287|ref|XP_001605285.1|	310	6e-83	PREDICTED: pre-mRNA-splicing regulator WTAP-like isoform 1 [Nasonia vitripennis] >gi|345481842|ref|XP_003424468.1| PREDICTED: pre-mRNA-splicing regulator WTAP-like isoform 2 [Nasonia vitripennis] >gi|345481845|ref|XP_003424469.1| PREDICTED: pre-mRNA-splicing regulator WTAP-like isoform 3 [Nasonia vitripennis]
CL2943.Contig2_CmRNA	728	13	2.0376	gi|156545287|ref|XP_001605285.1|	269	8e-71	PREDICTED: pre-mRNA-splicing regulator WTAP-like isoform 1 [Nasonia vitripennis] >gi|345481842|ref|XP_003424468.1| PREDICTED: pre-mRNA-splicing regulator WTAP-like isoform 2 [Nasonia vitripennis] >gi|345481845|ref|XP_003424469.1| PREDICTED: pre-mRNA-splicing regulator WTAP-like isoform 3 [Nasonia vitripennis]
CL2945.Contig1_CmRNA	685	245	40.8121	gi|117935428|gb|ABK57053.1|	108	2e-22	dentin-like protein [Glyptapanteles indiensis]
CL2949.Contig1_CmRNA	381	22	6.5889	gi|115757083|ref|XP_785784.2|	94.4	1e-18	PREDICTED: similar to ankyrin 2,3/unc44 [Strongylocentrotus purpuratus] >gi|115929471|ref|XP_001195307.1| PREDICTED: similar to ankyrin 2,3/unc44 [Strongylocentrotus purpuratus]
CL295.Contig1_CmRNA	1305	490	42.8449	gi|195485150|ref|XP_002090970.1|	132	5e-29	GE12508 [Drosophila yakuba] >gi|194177071|gb|EDW90682.1| GE12508 [Drosophila yakuba]
CL295.Contig2_CmRNA	752	1511	229.277	gi|260447210|gb|ACX37671.1|	61.2	4e-08	cecropin-D precursor [Agrius convolvuli]
CL2951.Contig1_CmRNA	745	6	0.919	gi|189240526|ref|XP_972038.2|	308	2e-82	PREDICTED: similar to liquid facets [Tribolium castaneum]
CL2951.Contig2_CmRNA	681	12	2.0107	gi|189240526|ref|XP_972038.2|	308	2e-82	PREDICTED: similar to liquid facets [Tribolium castaneum]
CL2952.Contig1_CmRNA	520	23	5.0471	gi|225734360|gb|ACO25163.1|	75.9	7e-13	midgut protein Lsti201 [Loxostege sticticalis]
CL2956.Contig1_CmRNA	1444	474	37.4563	gi|340723441|ref|XP_003400098.1|	328	4e-88	PREDICTED: venom serine carboxypeptidase-like [Bombus terrestris]
CL2956.Contig2_CmRNA	350	82	26.7337	gi|197098752|ref|NP_001124656.1|	89.4	4e-17	probable serine carboxypeptidase CPVL precursor [Pongo abelii] >gi|68565026|sp|Q5RFE4.1|CPVL_PONAB RecName: Full=Probable serine carboxypeptidase CPVL; Flags: Precursor
CL2957.Contig1_CmRNA	286	9	3.5908	gi|198474721|ref|XP_001356798.2|	97.1	2e-19	GA19509 [Drosophila pseudoobscura pseudoobscura] >gi|198138516|gb|EAL33864.2| GA19509 [Drosophila pseudoobscura pseudoobscura]
CL2957.Contig2_CmRNA	217	6	3.155	gi|345490908|ref|XP_001601738.2|	112	5e-24	PREDICTED: voltage-dependent L-type calcium channel subunit beta-2-like [Nasonia vitripennis]
CL2958.Contig1_CmRNA	264	3	1.2967	gi|183231643|ref|XP_001913604.1|	52.8	5e-06	immediate-early protein [Entamoeba histolytica HM-1:IMSS]
CL2959.Contig1_CmRNA	603	187	35.3865	gi|270298184|gb|ACZ68116.1|	90.1	5e-17	masquerade-like serine proteinase [Pieris rapae]
CL2960.Contig1_CmRNA	631	66	11.9352	gi|299930715|gb|ADJ58573.1|	163	6e-39	seminal fluid protein HACP035 [Heliconius melpomene]
CL2960.Contig2_CmRNA	631	40	7.2334	gi|299930715|gb|ADJ58573.1|	165	1e-39	seminal fluid protein HACP035 [Heliconius melpomene]
CL2962.Contig1_CmRNA	867	60	7.8967	gi|327420474|gb|AEA76313.1|	297	5e-79	astacin [Mamestra configurata]
CL2962.Contig2_CmRNA	864	2	0.2641	gi|327420474|gb|AEA76313.1|	298	2e-79	astacin [Mamestra configurata]
CL2962.Contig3_CmRNA	864	16	2.1131	gi|327420474|gb|AEA76313.1|	295	2e-78	astacin [Mamestra configurata]
CL2962.Contig4_CmRNA	861	23	3.0482	gi|327420474|gb|AEA76313.1|	296	8e-79	astacin [Mamestra configurata]
CL2967.Contig1_CmRNA	545	51	10.6779	gi|123456363|ref|XP_001315918.1|	112	6e-24	erythrocyte binding protein [Trichomonas vaginalis G3]
CL2967.Contig2_CmRNA	1076	73	7.7415	gi|71648919|ref|XP_813237.1|	184	8e-45	trans-sialidase [Trypanosoma cruzi strain CL Brener]
CL2970.Contig1_CmRNA	760	1913	287.22	gi|6671050|gb|AAF23078.1|AF128867_1	271	3e-71	glutathione S-transferase [Choristoneura fumiferana]
CL2971.Contig1_CmRNA	941	247	29.9517	gi|307215076|gb|EFN89883.1|	177	8e-43	Extended synaptotagmin-3 [Harpegnathos saltator]
CL2972.Contig1_CmRNA	1979	498	28.7142	gi|189031276|gb|ACD74811.1|	783	0	eukaryotic initiation factor 5C [Helicoverpa armigera]
CL2972.Contig2_CmRNA	1797	42	2.6669	gi|189031276|gb|ACD74811.1|	783	0	eukaryotic initiation factor 5C [Helicoverpa armigera]
CL2973.Contig1_CmRNA	412	12	3.3235	gi|332019831|gb|EGI60292.1|	261	8e-69	Poly(rC)-binding protein 3 [Acromyrmex echinatior]
CL2973.Contig2_CmRNA	387	5	1.4743	gi|332019831|gb|EGI60292.1|	209	4e-53	Poly(rC)-binding protein 3 [Acromyrmex echinatior]
CL2975.Contig1_CmRNA	447	38	9.7004	gi|189240342|ref|XP_971169.2|	96.3	4e-19	PREDICTED: similar to CG11009 CG11009-PA [Tribolium castaneum]
CL2975.Contig2_CmRNA	432	14	3.6979	gi|189240342|ref|XP_971169.2|	70.9	2e-11	PREDICTED: similar to CG11009 CG11009-PA [Tribolium castaneum]
CL2976.Contig1_CmRNA	535	26	5.5454	gi|307204876|gb|EFN83431.1|	323	3e-87	Protein flightless-1 [Harpegnathos saltator]
CL2976.Contig2_CmRNA	302	3	1.1335	gi|189240920|ref|XP_968304.2|	165	6e-40	PREDICTED: similar to flightless-1 [Tribolium castaneum]
CL2979.Contig1_CmRNA	625	54	9.8589	gi|284438051|gb|ADB85578.1|	267	2e-70	chitinase [Ostrinia nubilalis]
CL2979.Contig2_CmRNA	245	9	4.1917	gi|315131323|emb|CBM69270.1|	84.3	1e-15	venom protein Ci-45 [Chelonus inanitus]
CL298.Contig1_CmRNA	1002	412	46.9184	gi|112983886|ref|NP_001036853.1|	404	1e-111	elongation factor 1 delta [Bombyx mori] >gi|12328436|dbj|BAB21109.1| elongation factor 1 delta [Bombyx mori]
CL298.Contig2_CmRNA	912	136	17.016	gi|112983886|ref|NP_001036853.1|	348	2e-94	elongation factor 1 delta [Bombyx mori] >gi|12328436|dbj|BAB21109.1| elongation factor 1 delta [Bombyx mori]
CL2981.Contig1_CmRNA	854	54	7.2152	gi|113376731|gb|ABC59699.2|	531	1e-149	prophenoloxidase [Ostrinia furnacalis]
CL2981.Contig2_CmRNA	738	26	4.02	gi|113376731|gb|ABC59699.2|	318	2e-85	prophenoloxidase [Ostrinia furnacalis]
CL2983.Contig1_CmRNA	681	62	10.3886	gi|307182083|gb|EFN69461.1|	404	1e-111	Eukaryotic translation initiation factor 3 subunit B [Camponotus floridanus]
CL2983.Contig2_CmRNA	1200	107	10.1746	gi|307182083|gb|EFN69461.1|	694	0	Eukaryotic translation initiation factor 3 subunit B [Camponotus floridanus]
CL2984.Contig1_CmRNA	405	3	0.8452	gi|61658793|gb|AAX49604.1|	87.4	2e-16	RPGR [Macaca mulatta]
CL2984.Contig2_CmRNA	390	8	2.3407	gi|61658793|gb|AAX49604.1|	76.3	4e-13	RPGR [Macaca mulatta]
CL2988.Contig1_CmRNA	1687	943	63.7838	gi|328670887|gb|AEB26320.1|	523	1e-146	voltage-dependent anion-selective channel [Helicoverpa armigera]
CL2988.Contig2_CmRNA	1466	298	23.1951	gi|328670887|gb|AEB26320.1|	523	1e-147	voltage-dependent anion-selective channel [Helicoverpa armigera]
CL2989.Contig1_CmRNA	279	4	1.6359	gi|156540710|ref|XP_001602661.1|	68.9	6e-11	PREDICTED: similar to protease, reverse transcriptase, ribonuclease H, integrase [Nasonia vitripennis]
CL2989.Contig2_CmRNA	222	1	0.514	gi|156540025|ref|XP_001599081.1|	73.2	3e-12	PREDICTED: similar to protease, reverse transcriptase, ribonuclease H, integrase [Nasonia vitripennis]
CL299.Contig1_CmRNA	1686	36	2.4365	gi|309320761|gb|ADO64597.1|	873	0	E75 [Spodoptera littoralis]
CL299.Contig2_CmRNA	1622	40	2.814	gi|18033299|gb|AAL57047.1|AF332550_1	1041	0	orphan nuclear receptor E75A [Bombyx mori]
CL2990.Contig1_CmRNA	625	3	0.5477	gi|332020218|gb|EGI60662.1|	94.7	2e-18	Nose resistant to fluoxetine protein 6 [Acromyrmex echinatior]
CL2992.Contig1_CmRNA	234	9	4.3887	gi|156543322|ref|XP_001606160.1|	166	4e-40	PREDICTED: splicing factor U2af 38 kDa subunit-like [Nasonia vitripennis]
CL2992.Contig2_CmRNA	695	119	19.5378	gi|307172750|gb|EFN64036.1|	400	1e-110	Splicing factor U2af 38 kDa subunit [Camponotus floridanus] >gi|307174220|gb|EFN64865.1| Splicing factor U2af 38 kDa subunit [Camponotus floridanus]
CL2994.Contig1_CmRNA	1253	110	10.0174	gi|56798156|dbj|BAD82946.1|	321	5e-86	non-LTR retrotransposon R1Bmks ORF2 protein [Bombyx mori]
CL2994.Contig2_CmRNA	1098	25	2.5981	gi|56798156|dbj|BAD82946.1|	321	4e-86	non-LTR retrotransposon R1Bmks ORF2 protein [Bombyx mori]
CL2996.Contig1_CmRNA	305	7	2.6189	gi|307210100|gb|EFN86797.1|	100	2e-20	CKLF-like MARVEL transmembrane domain-containing protein 4 [Harpegnathos saltator]
CL2996.Contig2_CmRNA	268	2	0.8515	gi|307210100|gb|EFN86797.1|	100	2e-20	CKLF-like MARVEL transmembrane domain-containing protein 4 [Harpegnathos saltator]
CL2998.Contig1_CmRNA	487	23	5.3891	gi|332030550|gb|EGI70238.1|	173	2e-42	DNA-directed RNA polymerases I and III subunit RPAC1 [Acromyrmex echinatior]
CL2998.Contig2_CmRNA	281	0	0	gi|332030550|gb|EGI70238.1|	108	5e-23	DNA-directed RNA polymerases I and III subunit RPAC1 [Acromyrmex echinatior]
CL2999.Contig1_CmRNA	898	52	6.6076	gi|340717043|ref|XP_003396999.1|	311	2e-83	PREDICTED: epidermal growth factor receptor substrate 15-like 1-like [Bombus terrestris]
CL2999.Contig2_CmRNA	309	1	0.3693	gi|328789029|ref|XP_001122937.2|	95.1	8e-19	PREDICTED: epidermal growth factor receptor pathway substrate clone 15 [Apis mellifera]
CL30.Contig1_CmRNA	2025	208	11.7207	gi|157105982|ref|XP_001649111.1|	402	1e-110	zinc finger protein [Aedes aegypti] >gi|108879937|gb|EAT44162.1| zinc finger protein [Aedes aegypti]
CL30.Contig2_CmRNA	1156	0	0	gi|328789126|ref|XP_003251233.1|	254	5e-66	PREDICTED: zinc finger protein 717-like [Apis mellifera]
CL300.Contig1_CmRNA	538	493	104.563	gi|291236504|ref|XP_002738175.1|	358	8e-98	PREDICTED: GL12416-like isoform 2 [Saccoglossus kowalevskii]
CL300.Contig2_CmRNA	1394	917	75.062	gi|345486677|ref|XP_003425528.1|	870	0	PREDICTED: tubulin alpha-1 chain-like isoform 2 [Nasonia vitripennis]
CL300.Contig3_CmRNA	260	121	53.1038	gi|50345118|ref|NP_001002230.1|	187	2e-46	tubulin, alpha 7 like [Danio rerio] >gi|49119021|gb|AAH72721.1| Tubulin, alpha 7 like [Danio rerio] >gi|182890222|gb|AAI65338.1| Tuba7l protein [Danio rerio]
CL300.Contig4_CmRNA	727	168	26.3687	gi|112983501|ref|NP_001036885.1|	475	1e-133	alpha-tubulin [Bombyx mori] >gi|19773422|dbj|BAB86850.1| alpha-tubulin [Bombyx mori]
CL300.Contig5_CmRNA	213	35	18.75	gi|119117127|gb|ABL61211.1|	150	2e-35	alpha-tubulin [Cryptocercus punctulatus]
CL300.Contig6_CmRNA	1535	25448	1891.73	gi|156763634|gb|ABU94676.1|	924	0	alpha-tubulin [Xestia cnigrum] >gi|156763636|gb|ABU94677.1| alpha-tubulin [Mythimna separata] >gi|156763638|gb|ABU94678.1| alpha-tubulin [Spodoptera exigua] >gi|156763640|gb|ABU94679.1| alpha-tubulin [Agrotis ipsilon] >gi|237636934|gb|ACR07789.1| alpha tubulin [Heliothis virescens]
CL300.Contig7_CmRNA	1567	2928	213.214	gi|340722617|ref|XP_003399700.1|	923	0	PREDICTED: tubulin alpha-1 chain-like [Bombus terrestris]
CL3006.Contig1_CmRNA	853	74	9.8991	gi|189239227|ref|XP_973767.2|	308	3e-82	PREDICTED: similar to kakapo [Tribolium castaneum]
CL3006.Contig2_CmRNA	784	62	9.0238	gi|189239227|ref|XP_973767.2|	298	2e-79	PREDICTED: similar to kakapo [Tribolium castaneum]
CL3007.Contig1_CmRNA	447	381	97.2593	gi|12585496|sp|Q9U516.1|U139_MANSE	204	7e-52	RecName: Full=UPF0139 membrane protein pMsmaA27
CL3009.Contig1_CmRNA	492	310	71.8969	gi|315507099|gb|ADU33185.1|	164	1e-39	peptidoglycan recognition protein B [Ostrinia nubilalis]
CL3010.Contig1_CmRNA	281	9	3.6547	gi|156550173|ref|XP_001602750.1|	182	3e-45	PREDICTED: ubiquitin-conjugating enzyme E2 J1-like [Nasonia vitripennis]
CL3010.Contig2_CmRNA	241	7	3.3143	gi|307208891|gb|EFN86106.1|	163	2e-39	Ubiquitin-conjugating enzyme E2 J1 [Harpegnathos saltator]
CL3011.Contig1_CmRNA	717	1164	185.245	gi|126149261|dbj|BAF47403.1|	70.9	5e-11	insecticyanin [Agrius convolvuli]
CL3013.Contig1_CmRNA	934	334	40.805	gi|1256567|gb|AAC25787.1|	321	3e-86	cytochrome P-450 [Heliothis virescens]
CL3014.Contig1_CmRNA	472	71	17.1645	gi|109706829|gb|ABG43001.1|	124	2e-27	splicing factor proline- and glutamine-rich [Bombyx mori]
CL3014.Contig2_CmRNA	418	18	4.9137	gi|109706829|gb|ABG43001.1|	124	2e-27	splicing factor proline- and glutamine-rich [Bombyx mori]
CL3018.Contig1_CmRNA	1504	309	23.4436	gi|345494337|ref|XP_003427273.1|	763	0	PREDICTED: S-adenosylmethionine synthase-like isoform 2 [Nasonia vitripennis]
CL3018.Contig2_CmRNA	761	3	0.4498	gi|307193257|gb|EFN76148.1|	275	1e-72	S-adenosylmethionine synthetase [Harpegnathos saltator]
CL302.Contig1_CmRNA	1102	4003	414.493	gi|294459455|gb|ADE75590.1|	607	1e-172	actin [Antheraea pernyi]
CL302.Contig2_CmRNA	276	2364	977.354	gi|256862184|gb|ACV32627.1|	190	2e-47	beta-actin [Diabolocatantops pinguis]
CL302.Contig3_CmRNA	1410	45170	3655.48	gi|157122933|ref|XP_001659963.1|	763	0	actin [Aedes aegypti] >gi|158292553|ref|XP_313971.4| AGAP005095-PA [Anopheles gambiae str. PEST] >gi|170062886|ref|XP_001866863.1| actin 1 [Culex quinquefasciatus] >gi|1703156|sp|P49871.1|ACT_MANSE RecName: Full=Actin, muscle; Flags: Precursor >gi|293220|gb|AAA02814.1| actin [Manduca sexta] >gi|108882963|gb|EAT47188.1| actin [Aedes aegypti] >gi|117970202|dbj|BAF36825.1| muscle actin [Plutella xyl…
CL3022.Contig1_CmRNA	542	42	8.8423	gi|317418769|emb|CBN80807.1|	60.8	3e-08	Uncharacterized protein [Dicentrarchus labrax]
CL3025.Contig1_CmRNA	249	12	5.4991	gi|156539055|ref|XP_001599770.1|	142	6e-33	PREDICTED: histone H2A-like [Nasonia vitripennis] >gi|156548594|ref|XP_001607717.1| PREDICTED: histone H2A-like [Nasonia vitripennis]
CL3025.Contig2_CmRNA	203	12	6.7453	gi|340712625|ref|XP_003394856.1|	127	1e-28	PREDICTED: histone H2A-like [Bombus terrestris]
CL3027.Contig1_CmRNA	1485	25	1.921	gi|58387333|ref|XP_315488.2|	113	3e-23	AGAP005484-PA [Anopheles gambiae str. PEST] >gi|55238290|gb|EAA44029.2| AGAP005484-PA [Anopheles gambiae str. PEST]
CL3027.Contig2_CmRNA	1405	73	5.9287	gi|58387333|ref|XP_315488.2|	115	7e-24	AGAP005484-PA [Anopheles gambiae str. PEST] >gi|55238290|gb|EAA44029.2| AGAP005484-PA [Anopheles gambiae str. PEST]
CL3028.Contig1_CmRNA	229	40	19.9314	gi|114051706|ref|NP_001040425.1|	68.6	8e-11	antennal-enriched UDP-glycosyltransferase [Bombyx mori] >gi|95102846|gb|ABF51364.1| antennal-enriched UDP-glycosyltransferase [Bombyx mori]
CL3029.Contig1_CmRNA	667	22	3.7637	gi|270001392|gb|EEZ97839.1|	70.1	7e-11	hypothetical protein TcasGA2_TC000208 [Tribolium castaneum]
CL3029.Contig2_CmRNA	656	9	1.5655	gi|270001392|gb|EEZ97839.1|	53.5	7e-06	hypothetical protein TcasGA2_TC000208 [Tribolium castaneum]
CL3030.Contig1_CmRNA	1604	42	2.9878	gi|198434343|ref|XP_002125331.1|	251	9e-65	PREDICTED: similar to Tbccl protein [Ciona intestinalis]
CL3030.Contig2_CmRNA	1497	35	2.6678	gi|198434343|ref|XP_002125331.1|	251	8e-65	PREDICTED: similar to Tbccl protein [Ciona intestinalis]
CL3031.Contig1_CmRNA	509	34	7.6221	gi|114052492|ref|NP_001040248.1|	174	2e-42	glycolipid transfer protein [Bombyx mori] >gi|87248511|gb|ABD36308.1| glycolipid transfer protein [Bombyx mori]
CL3031.Contig2_CmRNA	344	1	0.3317	gi|114052492|ref|NP_001040248.1|	133	2e-30	glycolipid transfer protein [Bombyx mori] >gi|87248511|gb|ABD36308.1| glycolipid transfer protein [Bombyx mori]
CL3033.Contig1_CmRNA	884	1471	189.878	gi|66517407|ref|XP_623050.1|	493	1e-138	PREDICTED: 40S ribosomal protein S4-like isoform 1 [Apis mellifera]
CL3033.Contig2_CmRNA	889	2411	309.463	gi|332017152|gb|EGI57951.1|	491	1e-137	40S ribosomal protein S4 [Acromyrmex echinatior]
CL3036.Contig1_CmRNA	895	47	5.9922	gi|112984194|ref|NP_001037442.1|	417	1e-115	pyridoxine 5'-phosphate oxidase [Bombyx mori] >gi|91265778|gb|ABE28379.1| pyridoxine 5'-phosphate oxidase [Bombyx mori]
CL3036.Contig2_CmRNA	587	3	0.5832	gi|112984194|ref|NP_001037442.1|	243	5e-63	pyridoxine 5'-phosphate oxidase [Bombyx mori] >gi|91265778|gb|ABE28379.1| pyridoxine 5'-phosphate oxidase [Bombyx mori]
CL3041.Contig1_CmRNA	496	36	8.282	gi|189240095|ref|XP_972543.2|	148	1e-34	PREDICTED: similar to split ends CG18497-PA [Tribolium castaneum]
CL3042.Contig1_CmRNA	1086	2	0.2101	gi|340708870|ref|XP_003393041.1|	520	1e-146	PREDICTED: serine/threonine-protein kinase MARK2-like [Bombus terrestris]
CL3042.Contig2_CmRNA	1068	0	0	gi|307205332|gb|EFN83680.1|	510	1e-143	Serine/threonine-protein kinase MARK2 [Harpegnathos saltator]
CL3042.Contig3_CmRNA	1005	2	0.2271	gi|340708870|ref|XP_003393041.1|	481	1e-134	PREDICTED: serine/threonine-protein kinase MARK2-like [Bombus terrestris]
CL3042.Contig4_CmRNA	987	0	0	gi|332029794|gb|EGI69663.1|	471	1e-131	Serine/threonine-protein kinase MARK2 [Acromyrmex echinatior]
CL3043.Contig1_CmRNA	6868	3774	62.7026	gi|189240095|ref|XP_972543.2|	502	1e-140	PREDICTED: similar to split ends CG18497-PA [Tribolium castaneum]
CL3044.Contig1_CmRNA	609	1037	194.301	gi|291190976|pdb|2KHA|A	176	6e-43	Chain A, Solution Structure Of A Pathogen Recognition Domain From A Lepidopteran Insect, Plodia Interpunctella
CL3047.Contig1_CmRNA	401	36	10.2441	gi|18700461|dbj|BAB85198.1|	163	2e-39	Titin-like protein [Bombyx mori]
CL3047.Contig2_CmRNA	485	181	42.5844	gi|18700461|dbj|BAB85198.1|	204	1e-51	Titin-like protein [Bombyx mori]
CL3050.Contig1_CmRNA	2622	46	2.0019	gi|307213062|gb|EFN88593.1|	1014	0	Calpain-A [Harpegnathos saltator]
CL3050.Contig2_CmRNA	2697	46	1.9462	gi|307213062|gb|EFN88593.1|	999	0	Calpain-A [Harpegnathos saltator]
CL3055.Contig1_CmRNA	757	131	19.7465	gi|157126442|ref|XP_001654623.1|	73.2	1e-11	ribophorin ii [Aedes aegypti] >gi|157126444|ref|XP_001654624.1| ribophorin ii [Aedes aegypti] >gi|108873261|gb|EAT37486.1| ribophorin ii [Aedes aegypti] >gi|108873262|gb|EAT37487.1| ribophorin ii [Aedes aegypti]
CL3057.Contig1_CmRNA	2075	40	2.1997	gi|91083527|ref|XP_973110.1|	412	1e-113	PREDICTED: similar to AGAP007646-PA [Tribolium castaneum]
CL3057.Contig2_CmRNA	1901	4	0.2401	gi|91083527|ref|XP_973110.1|	412	1e-113	PREDICTED: similar to AGAP007646-PA [Tribolium castaneum]
CL3058.Contig1_CmRNA	223	10	5.1169	gi|298204347|gb|ADI61822.1|	82.4	5e-15	endonuclease-reverse transcriptase [Bombyx mori]
CL3062.Contig1_CmRNA	376	2038	618.486	gi|237506881|gb|ACQ99193.1|	66.2	4e-10	proline-rich protein [Galleria mellonella]
CL3064.Contig1_CmRNA	874	109	14.2308	gi|55771211|dbj|BAD72127.1|	82	3e-14	reverse transcriptase [Anguilla japonica]
CL3067.Contig1_CmRNA	1235	4422	408.569	gi|84782647|gb|ABC61672.1|	506	1e-142	cxpwmw03 [Periplaneta americana]
CL3069.Contig1_CmRNA	702	6	0.9753	gi|110765127|ref|XP_623749.2|	80.5	6e-14	PREDICTED: protein BCL9 homolog [Apis mellifera]
CL3069.Contig2_CmRNA	696	6	0.9837	gi|91092760|ref|XP_973551.1|	115	2e-24	PREDICTED: similar to legless CG2041-PA [Tribolium castaneum]
CL307.Contig1_CmRNA	639	59	10.5357	gi|91082337|ref|XP_966458.1|	271	2e-71	PREDICTED: similar to GA20722-PA [Tribolium castaneum]
CL307.Contig2_CmRNA	388	2	0.5882	gi|307206421|gb|EFN84459.1|	174	1e-42	Protein big brother [Harpegnathos saltator]
CL3070.Contig1_CmRNA	329	17	5.8961	gi|307191165|gb|EFN74863.1|	80.1	3e-14	G/T mismatch-specific thymine DNA glycosylase [Camponotus floridanus]
CL3070.Contig2_CmRNA	289	7	2.7638	gi|307191165|gb|EFN74863.1|	78.6	8e-14	G/T mismatch-specific thymine DNA glycosylase [Camponotus floridanus]
CL3071.Contig1_CmRNA	746	10	1.5296	gi|307176717|gb|EFN66133.1|	226	8e-58	Focal adhesion kinase 1 [Camponotus floridanus]
CL3071.Contig2_CmRNA	710	23	3.6964	gi|307176717|gb|EFN66133.1|	227	4e-58	Focal adhesion kinase 1 [Camponotus floridanus]
CL3072.Contig1_CmRNA	1547	660	48.6819	gi|307200054|gb|EFN80400.1|	300	2e-79	Putative serine protease K12H4.7 [Harpegnathos saltator]
CL3072.Contig2_CmRNA	470	7	1.6995	gi|307200054|gb|EFN80400.1|	95.5	6e-19	Putative serine protease K12H4.7 [Harpegnathos saltator]
CL3073.Contig1_CmRNA	709	32	5.1501	gi|307168125|gb|EFN61404.1|	114	4e-24	Muscle M-line assembly protein unc-89 [Camponotus floridanus]
CL3074.Contig1_CmRNA	443	0	0	gi|158295691|ref|XP_316357.4|	73.6	3e-12	AGAP006340-PA [Anopheles gambiae str. PEST] >gi|157016158|gb|EAA44201.4| AGAP006340-PA [Anopheles gambiae str. PEST]
CL3074.Contig2_CmRNA	359	0	0	gi|158295693|ref|XP_001688845.1|	61.2	1e-08	AGAP006340-PB [Anopheles gambiae str. PEST] >gi|157016159|gb|EDO63851.1| AGAP006340-PB [Anopheles gambiae str. PEST]
CL3075.Contig1_CmRNA	2698	480	20.3008	gi|6635437|gb|AAF19819.1|AF195528_1	476	1e-132	inhibitor of apoptosis protein [Trichoplusia ni]
CL3075.Contig2_CmRNA	2673	209	8.922	gi|6635437|gb|AAF19819.1|AF195528_1	476	1e-132	inhibitor of apoptosis protein [Trichoplusia ni]
CL3076.Contig1_CmRNA	1039	33	3.6242	gi|340714159|ref|XP_003395599.1|	288	8e-88	PREDICTED: threonine dehydratase catabolic-like isoform 2 [Bombus terrestris]
CL3076.Contig2_CmRNA	876	5	0.6513	gi|189239628|ref|XP_970671.2|	141	3e-32	PREDICTED: similar to CG8129 CG8129-PB [Tribolium castaneum]
CL3077.Contig1_CmRNA	1110	33	3.3924	gi|307198020|gb|EFN79080.1|	584	1e-165	Protein arginine N-methyltransferase 8 [Harpegnathos saltator]
CL3077.Contig2_CmRNA	1032	9	0.9951	gi|307198020|gb|EFN79080.1|	587	1e-166	Protein arginine N-methyltransferase 8 [Harpegnathos saltator]
CL3078.Contig1_CmRNA	1480	84	6.4764	gi|189242082|ref|XP_001809963.1|	145	6e-33	PREDICTED: similar to BEL12_AG transposon polyprotein [Tribolium castaneum]
CL3078.Contig2_CmRNA	1069	94	10.0338	gi|189242082|ref|XP_001809963.1|	226	1e-57	PREDICTED: similar to BEL12_AG transposon polyprotein [Tribolium castaneum]
CL3079.Contig1_CmRNA	2353	166	8.0501	gi|112982938|ref|NP_001037099.1|	355	4e-96	chorion b-ZIP transcription factor [Bombyx mori] >gi|54401523|gb|AAV34566.1| chorion b-ZIP transcription factor [Bombyx mori]
CL3079.Contig2_CmRNA	2220	428	21.9991	gi|112982938|ref|NP_001037099.1|	409	1e-112	chorion b-ZIP transcription factor [Bombyx mori] >gi|54401523|gb|AAV34566.1| chorion b-ZIP transcription factor [Bombyx mori]
CL3080.Contig1_CmRNA	1064	385	41.2888	gi|198461195|ref|XP_001361944.2|	258	3e-67	GA15718 [Drosophila pseudoobscura pseudoobscura] >gi|198137265|gb|EAL26523.2| GA15718 [Drosophila pseudoobscura pseudoobscura]
CL3080.Contig2_CmRNA	728	49	7.6803	gi|307212656|gb|EFN88359.1|	289	7e-77	Receptor expression-enhancing protein 1 [Harpegnathos saltator]
CL3085.Contig1_CmRNA	1344	42	3.5659	gi|94471737|gb|ABF21088.1|	368	1e-100	period [Bombyx mori]
CL3085.Contig2_CmRNA	1011	5	0.5643	gi|94471737|gb|ABF21088.1|	264	6e-69	period [Bombyx mori]
CL3086.Contig1_CmRNA	353	14	4.5255	gi|148698323|gb|EDL30270.1|	59.7	4e-08	mCG10912, isoform CRA_c [Mus musculus]
CL3087.Contig1_CmRNA	982	374	43.4584	gi|283483973|ref|NP_001164466.1|	356	1e-96	enhancer of split mbeta [Bombyx mori] >gi|281428763|gb|ADA69993.1| E(spl)-like protein [Bombyx mori]
CL3090.Contig1_CmRNA	1162	73	7.1685	gi|307191186|gb|EFN74883.1|	474	1e-132	Serine proteinase stubble [Camponotus floridanus]
CL3090.Contig2_CmRNA	989	18	2.0768	gi|307191186|gb|EFN74883.1|	511	1e-143	Serine proteinase stubble [Camponotus floridanus]
CL3092.Contig1_CmRNA	941	17	2.0615	gi|290965852|gb|ADD71058.1|	395	1e-108	odorant-binding protein [Chilo suppressalis]
CL3092.Contig2_CmRNA	804	3	0.4258	gi|290965852|gb|ADD71058.1|	395	1e-108	odorant-binding protein [Chilo suppressalis]
CL3093.Contig1_CmRNA	865	12	1.583	gi|289743311|gb|ADD20403.1|	436	1e-121	vesicle coat complex COPII subunit SEC23 [Glossina morsitans morsitans]
CL3093.Contig2_CmRNA	844	21	2.8392	gi|91086195|ref|XP_971475.1|	439	1e-122	PREDICTED: similar to protein transport protein sec23 [Tribolium castaneum]
CL3097.Contig1_CmRNA	716	86	13.7056	gi|189237193|ref|XP_001808466.1|	176	1e-42	PREDICTED: similar to CG5569 CG5569-PA [Tribolium castaneum]
CL3099.Contig2_CmRNA	1481	2242	172.74	gi|398989|sp|P31824.1|ACBP_MANSE	148	8e-34	RecName: Full=Acyl-CoA-binding protein homolog; Short=ACBP; AltName: Full=Diazepam-binding inhibitor homolog; Short=DBI >gi|159499|gb|AAA29309.1| diazepam binding inhibitor-like peptide [Manduca sexta] >gi|7548744|gb|AAB28237.2| diazepam binding inhibitor [Manduca sexta]
CL3100.Contig1_CmRNA	530	30	6.4589	gi|307208546|gb|EFN85885.1|	170	2e-41	LITAF-like protein [Harpegnathos saltator]
CL3100.Contig2_CmRNA	345	2	0.6615	gi|307208546|gb|EFN85885.1|	170	1e-41	LITAF-like protein [Harpegnathos saltator]
CL3101.Contig1_CmRNA	582	10	1.9606	gi|91081441|ref|XP_973723.1|	77.4	3e-13	PREDICTED: similar to CG5850 CG5850-PB [Tribolium castaneum]
CL3101.Contig2_CmRNA	561	8	1.6272	gi|91081441|ref|XP_973723.1|	77.4	3e-13	PREDICTED: similar to CG5850 CG5850-PB [Tribolium castaneum]
CL3103.Contig1_CmRNA	1123	27	2.7435	gi|170048504|ref|XP_001870693.1|	334	4e-90	CD2 antigen cytoplasmic tail-binding protein 2 [Culex quinquefasciatus] >gi|167870606|gb|EDS33989.1| CD2 antigen cytoplasmic tail-binding protein 2 [Culex quinquefasciatus]
CL3103.Contig2_CmRNA	1050	8	0.8694	gi|170048504|ref|XP_001870693.1|	334	4e-90	CD2 antigen cytoplasmic tail-binding protein 2 [Culex quinquefasciatus] >gi|167870606|gb|EDS33989.1| CD2 antigen cytoplasmic tail-binding protein 2 [Culex quinquefasciatus]
CL3104.Contig1_CmRNA	273	7	2.9258	gi|91093581|ref|XP_969296.1|	129	3e-29	PREDICTED: similar to AGAP001473-PA [Tribolium castaneum]
CL3107.Contig1_CmRNA	363	41	12.8882	gi|307207075|gb|EFN84884.1|	182	3e-45	Protein diaphanous [Harpegnathos saltator]
CL3107.Contig2_CmRNA	287	10	3.9759	gi|158300791|ref|XP_001689278.1|	131	8e-30	AGAP011901-PA [Anopheles gambiae str. PEST] >gi|157013331|gb|EDO63344.1| AGAP011901-PA [Anopheles gambiae str. PEST]
CL3108.Contig1_CmRNA	847	621	83.6608	gi|194897441|ref|XP_001978656.1|	136	1e-30	GG19705 [Drosophila erecta] >gi|190650305|gb|EDV47583.1| GG19705 [Drosophila erecta]
CL3109.Contig1_CmRNA	1572	10	0.7259	gi|328784054|ref|XP_393384.4|	844	0	PREDICTED: protein alan shepard-like [Apis mellifera]
CL3109.Contig2_CmRNA	1539	8	0.5932	gi|328784054|ref|XP_393384.4|	853	0	PREDICTED: protein alan shepard-like [Apis mellifera]
CL3109.Contig3_CmRNA	1511	4	0.3021	gi|328784054|ref|XP_393384.4|	835	0	PREDICTED: protein alan shepard-like [Apis mellifera]
CL3109.Contig4_CmRNA	1478	4	0.3088	gi|328784054|ref|XP_393384.4|	843	0	PREDICTED: protein alan shepard-like [Apis mellifera]
CL311.Contig2_CmRNA	687	1080	179.383	gi|195144720|ref|XP_002013344.1|	56.6	9e-07	GL23465 [Drosophila persimilis] >gi|194102287|gb|EDW24330.1| GL23465 [Drosophila persimilis]
CL3113.Contig1_CmRNA	3545	7911	254.641	gi|153792203|ref|NP_001093281.1|	832	0	vesicle amine transport protein [Bombyx mori] >gi|95103100|gb|ABF51491.1| vesicle amine transport protein [Bombyx mori]
CL3119.Contig1_CmRNA	608	25	4.6919	gi|195427930|ref|XP_002062028.1|	53.1	8e-06	GK16871 [Drosophila willistoni] >gi|194158113|gb|EDW73014.1| GK16871 [Drosophila willistoni]
CL3121.Contig1_CmRNA	1612	149	10.5471	gi|297206721|ref|NP_001171913.1|	761	0	flavin-dependent monooxygenase FMO3 [Bombyx mori] >gi|296427837|gb|ADH16750.1| flavin-dependent monooxygenase FMO3B [Bombyx mori]
CL3121.Contig2_CmRNA	1525	102	7.6321	gi|296427835|gb|ADH16749.1|	741	0	flavin-dependent monooxygenase FMO3A [Bombyx mori]
CL3125.Contig1_CmRNA	841	29	3.9347	gi|158293679|ref|XP_001231040.2|	124	7e-27	AGAP004936-PA [Anopheles gambiae str. PEST] >gi|157016563|gb|EAU76687.2| AGAP004936-PA [Anopheles gambiae str. PEST]
CL3125.Contig2_CmRNA	725	149	23.451	gi|158293679|ref|XP_001231040.2|	124	5e-27	AGAP004936-PA [Anopheles gambiae str. PEST] >gi|157016563|gb|EAU76687.2| AGAP004936-PA [Anopheles gambiae str. PEST]
CL313.Contig1_CmRNA	1884	2107	127.614	gi|333411320|gb|AEF32528.1|	890	0	beta-tubulin [Helicoverpa armigera]
CL313.Contig2_CmRNA	1868	3822	233.468	gi|12585365|sp|O17449.1|TBB1_MANSE	910	0	RecName: Full=Tubulin beta-1 chain; AltName: Full=Beta-1-tubulin >gi|2613141|gb|AAB84297.1| beta-1 tubulin [Manduca sexta]
CL313.Contig3_CmRNA	1796	2095	133.104	gi|333411320|gb|AEF32528.1|	909	0	beta-tubulin [Helicoverpa armigera]
CL313.Contig4_CmRNA	743	1241	190.589	gi|307201205|gb|EFN81111.1|	505	1e-142	Tubulin beta-1 chain [Harpegnathos saltator]
CL313.Contig5_CmRNA	1322	1208	104.267	gi|327290154|ref|XP_003229789.1|	836	0	PREDICTED: tubulin beta-2C chain-like [Anolis carolinensis]
CL313.Contig6_CmRNA	205	382	212.629	gi|345310312|ref|XP_001508591.2|	144	1e-33	PREDICTED: tubulin beta chain-like [Ornithorhynchus anatinus]
CL313.Contig7_CmRNA	278	18	7.3882	gi|66773102|ref|NP_001019593.1|	162	3e-39	tubulin, beta 2 [Danio rerio] >gi|66267355|gb|AAH95770.1| Zgc:112335 [Danio rerio]
CL313.Contig8_CmRNA	1145	3175	316.411	gi|112983342|ref|NP_001036965.1|	707	0	beta-tubulin [Bombyx mori] >gi|19773432|dbj|BAB86855.1| beta-tubulin [Bombyx mori]
CL3130.Contig1_CmRNA	699	241	39.3417	gi|114052609|ref|NP_001040261.1|	336	5e-91	nucleoplasmin isoform 2 [Bombyx mori] >gi|87248551|gb|ABD36328.1| nucleoplasmin isoform 2 [Bombyx mori]
CL3130.Contig2_CmRNA	648	441	77.6564	gi|290555898|ref|NP_001166837.1|	314	2e-84	nucleoplasmin isoform 1 [Bombyx mori] >gi|87248549|gb|ABD36327.1| nucleoplasmin isoform 1 [Bombyx mori]
CL3134.Contig1_CmRNA	416	29	7.9546	gi|195354156|ref|XP_002043566.1|	81.3	1e-14	GM18729 [Drosophila sechellia] >gi|194127734|gb|EDW49777.1| GM18729 [Drosophila sechellia]
CL3134.Contig2_CmRNA	380	95	28.5268	gi|195591509|ref|XP_002085483.1|	80.5	2e-14	GD12281 [Drosophila simulans] >gi|194197492|gb|EDX11068.1| GD12281 [Drosophila simulans]
CL3139.Contig2_CmRNA	289	1	0.3948	gi|296218736|ref|XP_002755570.1|	56.2	4e-07	PREDICTED: solute carrier family 22 member 20 [Callithrix jacchus]
CL314.Contig1_CmRNA	629	30	5.4423	gi|307206515|gb|EFN84541.1|	240	4e-62	Synapse-associated protein of 47 kDa [Harpegnathos saltator]
CL314.Contig2_CmRNA	231	16	7.9035	gi|307206515|gb|EFN84541.1|	59.7	4e-08	Synapse-associated protein of 47 kDa [Harpegnathos saltator]
CL3140.Contig1_CmRNA	426	43	11.5179	gi|328783731|ref|XP_623522.3|	231	7e-60	PREDICTED: RNA-binding protein Musashi homolog Rbp6-like isoform 2 [Apis mellifera]
CL3145.Contig1_CmRNA	1995	183	10.467	gi|328789990|ref|XP_392307.4|	902	0	PREDICTED: heterogeneous nuclear ribonucleoprotein Q-like [Apis mellifera]
CL3145.Contig2_CmRNA	1252	17	1.5494	gi|332026895|gb|EGI66996.1|	477	1e-133	Heterogeneous nuclear ribonucleoprotein Q [Acromyrmex echinatior]
CL315.Contig1_CmRNA	1659	28	1.9259	gi|112983659|ref|NP_001037337.1|	586	1e-165	DNA supercoiling factor [Bombyx mori] >gi|1663690|dbj|BAA08704.1| DNA supercoiling factor [Bombyx mori]
CL315.Contig2_CmRNA	1550	7	0.5153	gi|112983659|ref|NP_001037337.1|	586	1e-165	DNA supercoiling factor [Bombyx mori] >gi|1663690|dbj|BAA08704.1| DNA supercoiling factor [Bombyx mori]
CL3160.Contig1_CmRNA	212	213	114.646	gi|123412829|ref|XP_001304161.1|	94.7	1e-18	trichohyalin [Trichomonas vaginalis G3]
CL3162.Contig1_CmRNA	827	40	5.5191	gi|221106716|ref|XP_002169581.1|	57.8	6e-07	PREDICTED: similar to helentron 5 helitron-like transposon replicase/helicase/endonuclease [Hydra magnipapillata]
CL3169.Contig1_CmRNA	1225	390	36.3281	gi|340729954|ref|XP_003403258.1|	565	1e-159	PREDICTED: RNA-binding protein squid-like isoform 2 [Bombus terrestris]
CL3169.Contig2_CmRNA	1103	7	0.7242	gi|340729954|ref|XP_003403258.1|	565	1e-159	PREDICTED: RNA-binding protein squid-like isoform 2 [Bombus terrestris]
CL3170.Contig1_CmRNA	989	112	12.9222	gi|198466150|ref|XP_001353914.2|	311	4e-83	GA11155 [Drosophila pseudoobscura pseudoobscura] >gi|223590087|sp|Q2LZ59.2|MOB2_DROPS RecName: Full=Mps one binder kinase activator-like 2; AltName: Full=Mob as tumor suppressor protein 2 >gi|198150466|gb|EAL29650.2| GA11155 [Drosophila pseudoobscura pseudoobscura]
CL3170.Contig2_CmRNA	594	4	0.7684	gi|289739735|gb|ADD18615.1|	333	4e-90	cell cycle-associated protein Mob1-1 [Glossina morsitans morsitans]
CL3172.Contig1_CmRNA	674	2	0.3386	gi|91088149|ref|XP_971414.1|	242	1e-62	PREDICTED: similar to CG4329 CG4329-PA [Tribolium castaneum]
CL3172.Contig2_CmRNA	646	1	0.1766	gi|291224757|ref|XP_002732368.1|	236	4e-61	PREDICTED: WD repeat domain 65-like [Saccoglossus kowalevskii]
CL3173.Contig1_CmRNA	1088	23	2.4122	gi|333467991|gb|EAA07771.5|	66.6	2e-09	AGAP002737-PA [Anopheles gambiae str. PEST]
CL3173.Contig2_CmRNA	1070	16	1.7063	gi|167391687|ref|XP_001739888.1|	64.7	7e-09	axoneme-associated protein mst101 [Entamoeba dispar SAW760]
CL3174.Contig1_CmRNA	238	14	6.7122	gi|12862589|dbj|BAB32480.1|	120	2e-26	cuticle protein [Bombyx mori]
CL3178.Contig1_CmRNA	1764	73	4.7221	gi|114051868|ref|NP_001040436.1|	703	0	hydroxysteroid dehydrogenase [Bombyx mori] >gi|95102888|gb|ABF51385.1| hydroxysteroid dehydrogenase [Bombyx mori]
CL3178.Contig2_CmRNA	1942	205	12.0453	gi|114051868|ref|NP_001040436.1|	690	0	hydroxysteroid dehydrogenase [Bombyx mori] >gi|95102888|gb|ABF51385.1| hydroxysteroid dehydrogenase [Bombyx mori]
CL318.Contig1_CmRNA	333	84	28.7838	gi|345488671|ref|XP_001604187.2|	91.3	1e-17	PREDICTED: proclotting enzyme [Nasonia vitripennis]
CL3185.Contig1_CmRNA	592	29	5.5897	gi|328789842|ref|XP_001120023.2|	268	1e-70	PREDICTED: methionine-R-sulfoxide reductase B1 isoform 1 [Apis mellifera]
CL3185.Contig2_CmRNA	216	11	5.811	gi|332020936|gb|EGI61330.1|	122	5e-27	Methionine-R-sulfoxide reductase B1 [Acromyrmex echinatior]
CL3189.Contig1_CmRNA	1514	384	28.9414	gi|189236096|ref|XP_973523.2|	177	1e-42	PREDICTED: similar to tubulin-specific chaperone e [Tribolium castaneum]
CL3192.Contig1_CmRNA	1386	30	2.4699	gi|296427825|gb|ADH16743.1|	401	1e-148	ABC transporter family C protein ABCC3 [Heliothis subflexa]
CL3192.Contig2_CmRNA	1307	9	0.7857	gi|296427825|gb|ADH16743.1|	546	1e-154	ABC transporter family C protein ABCC3 [Heliothis subflexa]
CL3192.Contig3_CmRNA	1140	33	3.3031	gi|296427825|gb|ADH16743.1|	538	1e-151	ABC transporter family C protein ABCC3 [Heliothis subflexa]
CL3193.Contig1_CmRNA	286	41	16.358	gi|170062206|ref|XP_001866568.1|	179	4e-44	CCR4-NOT transcription complex subunit 7 [Culex quinquefasciatus] >gi|167880210|gb|EDS43593.1| CCR4-NOT transcription complex subunit 7 [Culex quinquefasciatus]
CL3193.Contig2_CmRNA	265	30	12.9178	gi|170062206|ref|XP_001866568.1|	165	6e-40	CCR4-NOT transcription complex subunit 7 [Culex quinquefasciatus] >gi|167880210|gb|EDS43593.1| CCR4-NOT transcription complex subunit 7 [Culex quinquefasciatus]
CL3194.Contig1_CmRNA	901	150	18.9968	gi|340721007|ref|XP_003398919.1|	55.1	4e-06	PREDICTED: hypothetical protein LOC100645725 [Bombus terrestris]
CL3194.Contig2_CmRNA	542	28	5.8948	gi|340721007|ref|XP_003398919.1|	55.1	1e-06	PREDICTED: hypothetical protein LOC100645725 [Bombus terrestris]
CL3195.Contig1_CmRNA	923	493	60.9479	gi|114052020|ref|NP_001040445.1|	442	1e-123	tropomyosin-1 [Bombyx mori] >gi|121958906|sp|Q1HPU0.1|TPM1_BOMMO RecName: Full=Tropomyosin-1 >gi|95102920|gb|ABF51401.1| tropomyosin 1 [Bombyx mori]
CL3195.Contig2_CmRNA	863	1706	225.57	gi|114052020|ref|NP_001040445.1|	464	1e-129	tropomyosin-1 [Bombyx mori] >gi|121958906|sp|Q1HPU0.1|TPM1_BOMMO RecName: Full=Tropomyosin-1 >gi|95102920|gb|ABF51401.1| tropomyosin 1 [Bombyx mori]
CL3196.Contig1_CmRNA	1053	644	69.7865	gi|156549977|ref|XP_001603755.1|	456	1e-126	PREDICTED: prostaglandin reductase 1-like [Nasonia vitripennis]
CL3198.Contig1_CmRNA	570	38	7.6072	gi|123456329|ref|XP_001315901.1|	55.8	1e-06	heavy neurofilament protein [Trichomonas vaginalis G3]
CL32.Contig1_CmRNA	290	162	63.7427	gi|295424204|ref|NP_001171331.1|	158	6e-38	juvenile hormone epoxide hydrolase-like protein 5 [Bombyx mori] >gi|292494345|dbj|BAI94514.1| juvenile hormone epoxide hydrolase-like protein 5 [Bombyx mori]
CL320.Contig1_CmRNA	1046	15	1.6363	gi|289740693|gb|ADD19094.1|	121	6e-26	synaptobrevin/VAMP-like protein [Glossina morsitans morsitans]
CL320.Contig2_CmRNA	1036	23	2.5333	gi|289740693|gb|ADD19094.1|	121	6e-26	synaptobrevin/VAMP-like protein [Glossina morsitans morsitans]
CL3200.Contig1_CmRNA	539	2899	613.724	gi|320524127|gb|ADW40542.1|	120	3e-26	neuropeptide-like precursor 4B [Bombyx mori]
CL3200.Contig2_CmRNA	264	1201	519.102	gi|320524127|gb|ADW40542.1|	115	4e-25	neuropeptide-like precursor 4B [Bombyx mori]
CL3204.Contig2_CmRNA	283	49	19.7571	gi|322789231|gb|EFZ14584.1|	53.9	2e-06	hypothetical protein SINV_15477 [Solenopsis invicta]
CL3215.Contig1_CmRNA	661	44	7.5956	gi|334855397|gb|AEH16630.1|	373	1e-102	GTPase [Helicoverpa armigera]
CL3215.Contig2_CmRNA	516	32	7.0764	gi|156545814|ref|XP_001607760.1|	281	7e-75	PREDICTED: GTP-binding protein CG1354-like [Nasonia vitripennis]
CL3217.Contig1_CmRNA	841	212	28.7643	gi|300885402|gb|ADK45364.1|	363	7e-99	troponin I [Polyrhachis vicina]
CL3217.Contig2_CmRNA	823	72	9.9827	gi|345480704|ref|XP_001604375.2|	350	5e-95	PREDICTED: troponin I 2-like [Nasonia vitripennis]
CL3219.Contig1_CmRNA	320	7	2.4961	gi|48095068|ref|XP_392230.1|	153	2e-36	PREDICTED: plastin-3 [Apis mellifera]
CL3219.Contig2_CmRNA	318	13	4.6648	gi|48095068|ref|XP_392230.1|	153	2e-36	PREDICTED: plastin-3 [Apis mellifera]
CL322.Contig1_CmRNA	1291	47	4.1542	gi|345496764|ref|XP_003427809.1|	73.6	2e-11	PREDICTED: hypothetical protein LOC100680266 isoform 1 [Nasonia vitripennis]
CL322.Contig2_CmRNA	1262	31	2.803	gi|345496764|ref|XP_003427809.1|	73.6	2e-11	PREDICTED: hypothetical protein LOC100680266 isoform 1 [Nasonia vitripennis]
CL3222.Contig1_CmRNA	288	330	130.748	gi|318087092|gb|ADV40137.1|	163	2e-39	actin 5C [Latrodectus hesperus]
CL3229.Contig1_CmRNA	730	21	3.2825	gi|158296027|ref|XP_001237838.2|	88.2	3e-16	AGAP006543-PA [Anopheles gambiae str. PEST] >gi|157016315|gb|EAU76624.2| AGAP006543-PA [Anopheles gambiae str. PEST]
CL3229.Contig2_CmRNA	711	2	0.321	gi|158296027|ref|XP_001237838.2|	88.2	3e-16	AGAP006543-PA [Anopheles gambiae str. PEST] >gi|157016315|gb|EAU76624.2| AGAP006543-PA [Anopheles gambiae str. PEST]
CL323.Contig1_CmRNA	588	38	7.3743	gi|158019|gb|AAA28736.1|	286	5e-76	optomotor-blind [Drosophila melanogaster]
CL323.Contig2_CmRNA	504	8	1.8112	gi|158019|gb|AAA28736.1|	300	2e-80	optomotor-blind [Drosophila melanogaster]
CL3232.Contig1_CmRNA	567	77	15.4961	gi|195080607|ref|XP_001997293.1|	127	4e-28	GH24709 [Drosophila grimshawi] >gi|193905660|gb|EDW04527.1| GH24709 [Drosophila grimshawi]
CL3233.Contig1_CmRNA	1980	37	2.1323	gi|170041760|ref|XP_001848620.1|	568	1e-160	zinc finger protein [Culex quinquefasciatus] >gi|167865366|gb|EDS28749.1| zinc finger protein [Culex quinquefasciatus]
CL3233.Contig2_CmRNA	1970	21	1.2164	gi|170041760|ref|XP_001848620.1|	568	1e-160	zinc finger protein [Culex quinquefasciatus] >gi|167865366|gb|EDS28749.1| zinc finger protein [Culex quinquefasciatus]
CL3237.Contig1_CmRNA	431	990	262.103	gi|332031504|gb|EGI70976.1|	294	9e-79	60S ribosomal protein L10 [Acromyrmex echinatior]
CL3237.Contig2_CmRNA	768	9768	1451.3	gi|315115483|gb|ADT80714.1|	447	1e-124	ribosomal protein L10 [Euphydryas aurinia]
CL3238.Contig1_CmRNA	495	43	9.9124	gi|268534534|ref|XP_002632398.1|	54.7	1e-06	C. briggsae CBR-SFA-1 protein [Caenorhabditis briggsae] >gi|187039110|emb|CAP21874.1| CBR-SFA-1 protein [Caenorhabditis briggsae AF16]
CL3244.Contig1_CmRNA	615	118	21.8938	gi|91088131|ref|XP_975884.1|	131	2e-29	PREDICTED: similar to CG17928 CG17928-PA isoform 2 [Tribolium castaneum]
CL3245.Contig1_CmRNA	1124	33	3.3501	gi|307208641|gb|EFN85931.1|	637	0	Protein disulfide-isomerase A5 [Harpegnathos saltator]
CL3245.Contig2_CmRNA	1022	18	2.0097	gi|58388720|ref|XP_316491.2|	592	1e-168	AGAP006452-PA [Anopheles gambiae str. PEST] >gi|55239222|gb|EAA11892.2| AGAP006452-PA [Anopheles gambiae str. PEST]
CL3245.Contig3_CmRNA	687	3	0.4983	gi|195028542|ref|XP_001987135.1|	369	1e-101	GH20141 [Drosophila grimshawi] >gi|193903135|gb|EDW02002.1| GH20141 [Drosophila grimshawi]
CL325.Contig1_CmRNA	1359	138	11.5871	gi|151301198|ref|NP_001093087.1|	202	3e-50	mobility group protein 1B [Bombyx mori] >gi|95102634|gb|ABF51255.1| mobility group protein 1B [Bombyx mori]
CL325.Contig2_CmRNA	1168	123	12.0164	gi|151301198|ref|NP_001093087.1|	202	2e-50	mobility group protein 1B [Bombyx mori] >gi|95102634|gb|ABF51255.1| mobility group protein 1B [Bombyx mori]
CL325.Contig4_CmRNA	523	1390	303.268	gi|151301198|ref|NP_001093087.1|	201	1e-50	mobility group protein 1B [Bombyx mori] >gi|95102634|gb|ABF51255.1| mobility group protein 1B [Bombyx mori]
CL3252.Contig1_CmRNA	921	355	43.9827	gi|239579429|gb|ACR82291.1|	141	5e-32	attacin-like antimicrobial protein [Papilio xuthus]
CL3252.Contig2_CmRNA	730	44	6.8777	gi|239579429|gb|ACR82291.1|	141	3e-32	attacin-like antimicrobial protein [Papilio xuthus]
CL3255.Contig1_CmRNA	565	3	0.6059	gi|195397491|ref|XP_002057362.1|	199	7e-50	GJ16387 [Drosophila virilis] >gi|194147129|gb|EDW62848.1| GJ16387 [Drosophila virilis]
CL3255.Contig2_CmRNA	524	1	0.2178	gi|333470238|gb|EAA01315.4|	191	1e-47	AGAP001499-PA [Anopheles gambiae str. PEST]
CL326.Contig1_CmRNA	962	5	0.5931	gi|195112014|ref|XP_002000571.1|	108	5e-22	GI22448 [Drosophila mojavensis] >gi|193917165|gb|EDW16032.1| GI22448 [Drosophila mojavensis]
CL326.Contig2_CmRNA	931	22	2.6964	gi|328784649|ref|XP_003250480.1|	95.5	3e-18	PREDICTED: hypothetical protein LOC100576140 [Apis mellifera]
CL326.Contig3_CmRNA	359	23	7.3105	gi|195112014|ref|XP_002000571.1|	108	9e-23	GI22448 [Drosophila mojavensis] >gi|193917165|gb|EDW16032.1| GI22448 [Drosophila mojavensis]
CL3262.Contig1_CmRNA	1254	227	20.6558	gi|306518656|ref|NP_001182390.1|	482	1e-134	UDP-glucosyltransferase [Bombyx mori] >gi|296784925|dbj|BAJ08159.1| UDP-glucosyltransferase [Bombyx mori]
CL327.Contig1_CmRNA	902	87	11.0059	gi|114051161|ref|NP_001040392.1|	384	1e-105	transcription factor 2B [Bombyx mori] >gi|95102724|gb|ABF51303.1| transcription factor 2B [Bombyx mori]
CL327.Contig2_CmRNA	900	34	4.3107	gi|114051161|ref|NP_001040392.1|	354	3e-96	transcription factor 2B [Bombyx mori] >gi|95102724|gb|ABF51303.1| transcription factor 2B [Bombyx mori]
CL327.Contig3_CmRNA	803	9	1.2789	gi|114051161|ref|NP_001040392.1|	354	3e-96	transcription factor 2B [Bombyx mori] >gi|95102724|gb|ABF51303.1| transcription factor 2B [Bombyx mori]
CL3270.Contig1_CmRNA	382	19	5.6755	gi|328723712|ref|XP_001943801.2|	93.2	3e-18	PREDICTED: uncharacterized protein C22orf25 homolog [Acyrthosiphon pisum]
CL3270.Contig2_CmRNA	292	1	0.3908	gi|328723712|ref|XP_001943801.2|	60.5	2e-08	PREDICTED: uncharacterized protein C22orf25 homolog [Acyrthosiphon pisum]
CL3271.Contig1_CmRNA	3083	16904	625.647	gi|91088677|ref|XP_974860.1|	1358	0	PREDICTED: similar to Aconitase CG9244-PB [Tribolium castaneum]
CL3276.Contig1_CmRNA	416	6	1.6458	gi|307213342|gb|EFN88794.1|	149	3e-35	Homeotic protein female sterile [Harpegnathos saltator]
CL3276.Contig2_CmRNA	411	1	0.2776	gi|307213342|gb|EFN88794.1|	140	2e-32	Homeotic protein female sterile [Harpegnathos saltator]
CL3277.Contig1_CmRNA	1078	222	23.4989	gi|112983062|ref|NP_001037056.1|	259	2e-67	C-type lectin 21 [Bombyx mori] >gi|4469126|emb|CAB38429.1| lipopolysaccharide binding protein [Bombyx mori]
CL3277.Contig2_CmRNA	1135	497	49.966	gi|112983062|ref|NP_001037056.1|	204	8e-51	C-type lectin 21 [Bombyx mori] >gi|4469126|emb|CAB38429.1| lipopolysaccharide binding protein [Bombyx mori]
CL3278.Contig1_CmRNA	395	55	15.8884	gi|91079830|ref|XP_970174.1|	142	3e-33	PREDICTED: similar to GA10531-PA [Tribolium castaneum]
CL3279.Contig1_CmRNA	1509	110	8.318	gi|195351778|ref|XP_002042406.1|	176	3e-42	GM13300 [Drosophila sechellia] >gi|194124249|gb|EDW46292.1| GM13300 [Drosophila sechellia]
CL3279.Contig2_CmRNA	980	4	0.4657	gi|195351778|ref|XP_002042406.1|	91.3	6e-17	GM13300 [Drosophila sechellia] >gi|194124249|gb|EDW46292.1| GM13300 [Drosophila sechellia]
CL3280.Contig1_CmRNA	885	8757	1129.08	gi|112982669|ref|NP_001037564.1|	530	1e-149	ribosomal protein S2 [Bombyx mori] >gi|54609283|gb|AAV34857.1| ribosomal protein S2 [Bombyx mori]
CL3280.Contig2_CmRNA	929	2040	250.569	gi|62083451|gb|AAX62450.1|	528	1e-148	ribosomal protein S2 [Lysiphlebus testaceipes]
CL3288.Contig1_CmRNA	1512	132	9.9618	gi|115772413|ref|XP_001199690.1|	72.8	4e-11	PREDICTED: similar to mucin [Strongylocentrotus purpuratus] >gi|115955563|ref|XP_001182550.1| PREDICTED: similar to mucin [Strongylocentrotus purpuratus]
CL3288.Contig2_CmRNA	1491	84	6.4286	gi|115772413|ref|XP_001199690.1|	70.5	2e-10	PREDICTED: similar to mucin [Strongylocentrotus purpuratus] >gi|115955563|ref|XP_001182550.1| PREDICTED: similar to mucin [Strongylocentrotus purpuratus]
CL3289.Contig1_CmRNA	494	66	15.2451	gi|307199088|gb|EFN79798.1|	259	4e-68	Adenylosuccinate synthetase [Harpegnathos saltator]
CL329.Contig1_CmRNA	259	60	26.4341	gi|134001215|gb|ABO45231.1|	65.5	7e-10	reverse transcriptase [Ostrinia nubilalis] >gi|134001296|gb|ABO45237.1| reverse transcriptase [Ostrinia nubilalis]
CL3292.Contig1_CmRNA	1210	278	26.2164	gi|91079915|ref|XP_967163.1|	488	1e-136	PREDICTED: similar to AGAP004937-PA [Tribolium castaneum]
CL3292.Contig2_CmRNA	302	9	3.4006	gi|156537407|ref|XP_001606818.1|	186	3e-46	PREDICTED: cold shock domain-containing protein E1-like [Nasonia vitripennis]
CL3293.Contig1_CmRNA	1155	8977	886.876	gi|71159504|gb|AAZ29605.1|	664	0	activated C kinase 1 receptor [Choristoneura fumiferana]
CL3293.Contig2_CmRNA	1050	4605	500.442	gi|48104663|ref|XP_392962.1|	623	1e-177	PREDICTED: receptor of activated protein kinase C 1 isoform 1 [Apis mellifera]
CL3297.Contig1_CmRNA	359	28	8.8997	gi|339283874|gb|AEJ38206.1|	162	5e-39	antennal esterase CarE7 [Spodoptera exigua]
CL3297.Contig2_CmRNA	297	11	4.2262	gi|339283874|gb|AEJ38206.1|	121	8e-27	antennal esterase CarE7 [Spodoptera exigua]
CL3298.Contig1_CmRNA	750	87	13.2365	gi|289684253|ref|NP_001166275.1|	189	1e-46	cuticular protein RR-2 family member 8 [Nasonia vitripennis]
CL3298.Contig2_CmRNA	714	86	13.744	gi|189234385|ref|XP_001815487.1|	179	1e-43	PREDICTED: similar to Ccp84Ad CG2341-PA [Tribolium castaneum]
CL3299.Contig1_CmRNA	274	33	13.7429	gi|281203735|gb|EFA77931.1|	54.3	2e-06	hypothetical protein PPL_08576 [Polysphondylium pallidum PN500]
CL3300.Contig1_CmRNA	1549	156	11.4918	gi|112984316|ref|NP_001037474.1|	631	1e-179	hepatocyte nuclear factor 4 isoform a [Bombyx mori] >gi|2734850|gb|AAB93762.1| hepatocyte nuclear factor 4 isoform a [Bombyx mori]
CL3300.Contig2_CmRNA	706	10	1.6163	gi|112984316|ref|NP_001037474.1|	435	1e-121	hepatocyte nuclear factor 4 isoform a [Bombyx mori] >gi|2734850|gb|AAB93762.1| hepatocyte nuclear factor 4 isoform a [Bombyx mori]
CL3307.Contig1_CmRNA	692	95	15.665	gi|170051600|ref|XP_001861838.1|	182	1e-44	mpv17 protein [Culex quinquefasciatus] >gi|167872775|gb|EDS36158.1| mpv17 protein [Culex quinquefasciatus]
CL3308.Contig1_CmRNA	906	165	20.7811	gi|157114119|ref|XP_001652168.1|	236	1e-60	2-oxoglutarate dehydrogenase [Aedes aegypti] >gi|108877402|gb|EAT41627.1| 2-oxoglutarate dehydrogenase [Aedes aegypti]
CL3308.Contig2_CmRNA	937	144	17.5362	gi|157114119|ref|XP_001652168.1|	236	1e-60	2-oxoglutarate dehydrogenase [Aedes aegypti] >gi|108877402|gb|EAT41627.1| 2-oxoglutarate dehydrogenase [Aedes aegypti]
CL3310.Contig1_CmRNA	1169	96	9.3707	gi|332029067|gb|EGI69081.1|	144	1e-32	Leucine-rich repeat-containing protein 27 [Acromyrmex echinatior]
CL3317.Contig1_CmRNA	911	232	29.0592	gi|333466873|gb|EAA06366.5|	335	2e-90	AGAP000598-PA [Anopheles gambiae str. PEST]
CL3318.Contig1_CmRNA	2317	621	30.5829	gi|260595791|gb|ACX46913.1|	980	0	cGMP-dependent protein kinase foraging protein [Mythimna separata]
CL3319.Contig1_CmRNA	795	114	16.3626	gi|324120586|dbj|BAJ78684.1|	525	1e-148	RNA polymerase II largest subunit [Papilio polytes]
CL3319.Contig2_CmRNA	200	6	3.4232	gi|317417144|emb|CBI70602.1|	127	2e-28	RNA polymerase II [Phryganea grandis]
CL3324.Contig1_CmRNA	677	2390	402.831	gi|268570883|ref|XP_002648638.1|	62.4	2e-08	Hypothetical protein CBG24987 [Caenorhabditis briggsae]
CL3324.Contig2_CmRNA	613	282	52.4931	gi|332025910|gb|EGI66066.1|	60.8	4e-08	Histone-lysine N-methyltransferase trithorax [Acromyrmex echinatior]
CL3326.Contig1_CmRNA	1191	30	2.8742	gi|223670788|dbj|BAH22627.1|	296	1e-107	possible precursor of neuropeptides [Bombyx mori]
CL3326.Contig2_CmRNA	1226	15	1.3961	gi|223670788|dbj|BAH22627.1|	427	1e-118	possible precursor of neuropeptides [Bombyx mori]
CL3329.Contig1_CmRNA	787	8	1.1599	gi|328776555|ref|XP_393883.3|	411	1e-113	PREDICTED: proteasome activator complex subunit 3-like [Apis mellifera]
CL3329.Contig2_CmRNA	774	2	0.2949	gi|328776555|ref|XP_393883.3|	407	1e-112	PREDICTED: proteasome activator complex subunit 3-like [Apis mellifera]
CL333.Contig2_CmRNA	438	1	0.2605	gi|307184792|gb|EFN71106.1|	57.4	2e-07	Methyl-CpG-binding domain protein 5 [Camponotus floridanus]
CL3330.Contig1_CmRNA	937	96	11.6908	gi|114051844|ref|NP_001040432.1|	349	1e-94	L-xylulose reductase [Bombyx mori] >gi|95102868|gb|ABF51375.1| dicarbonyl L-xylulose reductase [Bombyx mori]
CL3330.Contig2_CmRNA	684	12	2.0019	gi|114051844|ref|NP_001040432.1|	215	1e-54	L-xylulose reductase [Bombyx mori] >gi|95102868|gb|ABF51375.1| dicarbonyl L-xylulose reductase [Bombyx mori]
CL3331.Contig1_CmRNA	466	18	4.4076	gi|162462371|ref|NP_001104817.1|	193	2e-48	hemocytin precursor [Bombyx mori] >gi|1346296|sp|P98092.1|HMCT_BOMMO RecName: Full=Hemocytin; AltName: Full=Humoral lectin; Flags: Precursor >gi|664884|dbj|BAA06160.1| humoral lectin prepropeptide [Bombyx mori] >gi|1094393|prf||2106140A hemocytin
CL3333.Contig1_CmRNA	978	39	4.5503	gi|158285290|ref|XP_564589.3|	419	1e-115	AGAP007642-PA [Anopheles gambiae str. PEST] >gi|157019920|gb|EAL41738.3| AGAP007642-PA [Anopheles gambiae str. PEST]
CL3333.Contig2_CmRNA	877	85	11.0594	gi|158285290|ref|XP_564589.3|	449	1e-124	AGAP007642-PA [Anopheles gambiae str. PEST] >gi|157019920|gb|EAL41738.3| AGAP007642-PA [Anopheles gambiae str. PEST]
CL3336.Contig1_CmRNA	354	1186	382.292	gi|123431636|ref|XP_001308251.1|	44.7	9e-08	flocculin [Trichomonas vaginalis G3]
CL3337.Contig1_CmRNA	255	50	22.374	gi|298204325|gb|ADI61811.1|	43.9	1e-06	endonuclease-reverse transcriptase [Bombyx mori]
CL3338.Contig1_CmRNA	665	31	5.3193	gi|114051790|ref|NP_001040183.1|	315	8e-85	peptidyl-prolyl cis-trans isomerase E [Bombyx mori] >gi|87248307|gb|ABD36206.1| peptidyl-prolyl cis-trans isomerase E [Bombyx mori]
CL3338.Contig2_CmRNA	427	4	1.0689	gi|114051790|ref|NP_001040183.1|	106	3e-22	peptidyl-prolyl cis-trans isomerase E [Bombyx mori] >gi|87248307|gb|ABD36206.1| peptidyl-prolyl cis-trans isomerase E [Bombyx mori]
CL3339.Contig1_CmRNA	2072	140	7.71	gi|304421470|gb|ADM32534.1|	243	3e-62	TNFSF13 [Bombyx mori]
CL3339.Contig2_CmRNA	2095	230	12.5273	gi|304421470|gb|ADM32534.1|	243	3e-62	TNFSF13 [Bombyx mori]
CL3348.Contig1_CmRNA	991	82	9.4418	gi|157127049|ref|XP_001654778.1|	303	1e-80	inositol triphosphate 3-kinase c [Aedes aegypti] >gi|108884483|gb|EAT48708.1| inositol triphosphate 3-kinase c [Aedes aegypti]
CL3348.Contig2_CmRNA	355	1	0.3214	gi|158289829|ref|XP_311464.4|	174	8e-43	AGAP010480-PA [Anopheles gambiae str. PEST] >gi|157018346|gb|EAA07101.4| AGAP010480-PA [Anopheles gambiae str. PEST]
CL3349.Contig1_CmRNA	1972	131	7.5802	gi|7576710|gb|AAF63957.1|	789	0	CALNUC [Spodoptera frugiperda]
CL3349.Contig2_CmRNA	1951	154	9.0069	gi|7576710|gb|AAF63957.1|	786	0	CALNUC [Spodoptera frugiperda]
CL3352.Contig1_CmRNA	602	21	3.9805	gi|307212301|gb|EFN88109.1|	179	5e-44	ETS-like protein pointed, isoform P2 [Harpegnathos saltator]
CL3352.Contig2_CmRNA	580	8	1.5739	gi|307212301|gb|EFN88109.1|	179	5e-44	ETS-like protein pointed, isoform P2 [Harpegnathos saltator]
CL3354.Contig1_CmRNA	1933	520	30.6962	gi|189242082|ref|XP_001809963.1|	443	1e-122	PREDICTED: similar to BEL12_AG transposon polyprotein [Tribolium castaneum]
CL3355.Contig1_CmRNA	422	110	29.7436	gi|333469997|gb|EAA01173.5|	189	4e-47	AGAP001783-PA [Anopheles gambiae str. PEST] >gi|333469998|gb|EGK97478.1| AGAP001783-PB [Anopheles gambiae str. PEST]
CL3359.Contig1_CmRNA	809	60	8.4628	gi|300295309|gb|ADJ96648.1|	65.5	3e-09	epiglycanin [Mus musculus]
CL3362.Contig1_CmRNA	341	13	4.3501	gi|307211463|gb|EFN87569.1|	94.7	1e-18	Protein phosphatase 1 regulatory subunit 12A [Harpegnathos saltator]
CL3362.Contig2_CmRNA	337	8	2.7088	gi|332025733|gb|EGI65891.1|	90.9	2e-17	Protein phosphatase 1 regulatory subunit 12A [Acromyrmex echinatior]
CL3365.Contig1_CmRNA	964	6	0.7102	gi|239793615|dbj|BAH72916.1|	120	7e-26	ACYPI004125 [Acyrthosiphon pisum] >gi|239793617|dbj|BAH72917.1| ACYPI004125 [Acyrthosiphon pisum]
CL3365.Contig2_CmRNA	878	3	0.3899	gi|239793615|dbj|BAH72916.1|	120	6e-26	ACYPI004125 [Acyrthosiphon pisum] >gi|239793617|dbj|BAH72917.1| ACYPI004125 [Acyrthosiphon pisum]
CL3369.Contig1_CmRNA	260	127	55.7371	gi|308482644|ref|XP_003103525.1|	57.8	1e-07	CRE-CLEC-199 protein [Caenorhabditis remanei] >gi|308259946|gb|EFP03899.1| CRE-CLEC-199 protein [Caenorhabditis remanei]
CL337.Contig1_CmRNA	259	3	1.3217	gi|332022084|gb|EGI62409.1|	68.2	1e-19	RILP-like protein-like protein [Acromyrmex echinatior] >gi|332022086|gb|EGI62411.1| RILP-like protein-like protein [Acromyrmex echinatior]
CL337.Contig2_CmRNA	245	9	4.1917	gi|332022084|gb|EGI62409.1|	111	1e-23	RILP-like protein-like protein [Acromyrmex echinatior] >gi|332022086|gb|EGI62411.1| RILP-like protein-like protein [Acromyrmex echinatior]
CL3371.Contig1_CmRNA	1797	43	2.7304	gi|304307737|ref|NP_001182008.1|	626	1e-177	loquacious [Bombyx mori] >gi|300669735|dbj|BAJ11656.1| loquacious [Bombyx mori]
CL3371.Contig2_CmRNA	1716	24	1.5959	gi|304307737|ref|NP_001182008.1|	626	1e-177	loquacious [Bombyx mori] >gi|300669735|dbj|BAJ11656.1| loquacious [Bombyx mori]
CL3373.Contig1_CmRNA	440	39	10.1141	gi|170041628|ref|XP_001848558.1|	66.6	3e-10	ATP synthase a chain [Culex quinquefasciatus] >gi|167865196|gb|EDS28579.1| ATP synthase a chain [Culex quinquefasciatus]
CL3383.Contig1_CmRNA	1714	23	1.5312	gi|294459899|ref|NP_001170882.1|	614	1e-174	tan protein [Bombyx mori] >gi|291486763|dbj|BAI87831.1| Tan [Bombyx mori]
CL3383.Contig2_CmRNA	1710	63	4.204	gi|294459899|ref|NP_001170882.1|	605	1e-171	tan protein [Bombyx mori] >gi|291486763|dbj|BAI87831.1| Tan [Bombyx mori]
CL3388.Contig1_CmRNA	1149	61	6.0579	gi|260908004|gb|ACX53801.1|	394	1e-108	short-chain dehydrogenase [Heliothis virescens]
CL3388.Contig2_CmRNA	610	0	0	gi|260908004|gb|ACX53801.1|	242	9e-63	short-chain dehydrogenase [Heliothis virescens]
CL3390.Contig1_CmRNA	368	27	8.372	gi|307190250|gb|EFN74357.1|	207	1e-52	Transcription initiation factor IIA subunit 2 [Camponotus floridanus]
CL3390.Contig2_CmRNA	513	146	32.475	gi|114052188|ref|NP_001040463.1|	211	1e-53	transcription initiation factor IIA gamma chain [Bombyx mori] >gi|95102994|gb|ABF51438.1| transcription initiation factor IIA gamma chain [Bombyx mori]
CL3392.Contig1_CmRNA	232	18535	9116.29	gi|255652871|ref|NP_001157376.1|	58.2	1e-07	cuticular protein CPFL family 4 [Bombyx mori] >gi|239946286|gb|ACS36222.1| hard cuticular protein 1 [Bombyx mori]
CL3407.Contig1_CmRNA	429	10	2.6598	gi|333467171|gb|EAA06446.5|	135	5e-31	AGAP000262-PA [Anopheles gambiae str. PEST]
CL3407.Contig2_CmRNA	391	22	6.4204	gi|194769720|ref|XP_001966949.1|	92.8	4e-18	GF21786 [Drosophila ananassae] >gi|190622744|gb|EDV38268.1| GF21786 [Drosophila ananassae]
CL3411.Contig1_CmRNA	609	229	42.9074	gi|3874911|emb|CAB02844.1|	79.7	8e-14	C. elegans protein C41G7.6, confirmed by transcript evidence [Caenorhabditis elegans]
CL3411.Contig2_CmRNA	534	107	22.8642	gi|3874911|emb|CAB02844.1|	82.8	6e-15	C. elegans protein C41G7.6, confirmed by transcript evidence [Caenorhabditis elegans]
CL3412.Contig1_CmRNA	1403	1117	90.8467	gi|170030938|ref|XP_001843344.1|	374	1e-102	aspartyl/asparaginyl beta-hydroxylase [Culex quinquefasciatus] >gi|167868824|gb|EDS32207.1| aspartyl/asparaginyl beta-hydroxylase [Culex quinquefasciatus]
CL3414.Contig1_CmRNA	274	629	261.947	gi|145504775|ref|XP_001438354.1|	53.1	3e-06	hypothetical protein [Paramecium tetraurelia strain d4-2] >gi|124405526|emb|CAK70957.1| unnamed protein product [Paramecium tetraurelia]
CL3417.Contig1_CmRNA	966	862	101.823	gi|56462320|gb|AAV91443.1|	80.9	8e-14	putative secreted peptide 30 [Lonomia obliqua]
CL3419.Contig1_CmRNA	541	13	2.742	gi|223670788|dbj|BAH22627.1|	194	2e-48	possible precursor of neuropeptides [Bombyx mori]
CL3419.Contig2_CmRNA	511	37	8.2622	gi|223670788|dbj|BAH22627.1|	202	6e-51	possible precursor of neuropeptides [Bombyx mori]
CL342.Contig1_CmRNA	1615	1343	94.8893	gi|121583752|ref|NP_001073568.1|	412	1e-113	cuticular protein analogous to peritrophins 3-D2 [Tribolium castaneum] >gi|119387892|gb|ABL73931.1| obstractor D [Tribolium castaneum]
CL3422.Contig1_CmRNA	1337	1902	162.328	gi|157285980|gb|ABV31711.1|	210	1e-62	transposase [Salmo salar]
CL3423.Contig1_CmRNA	265	388	167.07	gi|146327864|emb|CAM84319.1|	97.8	1e-19	chymotrypsinogen-like protein 4 [Manduca sexta]
CL3423.Contig2_CmRNA	484	102	24.0474	gi|146327864|emb|CAM84319.1|	130	2e-29	chymotrypsinogen-like protein 4 [Manduca sexta]
CL3425.Contig1_CmRNA	748	5	0.7627	gi|327275707|ref|XP_003222614.1|	99.8	1e-19	PREDICTED: WAS/WASL-interacting protein family member 2-like [Anolis carolinensis]
CL3425.Contig2_CmRNA	739	2	0.3088	gi|327275707|ref|XP_003222614.1|	96.3	1e-18	PREDICTED: WAS/WASL-interacting protein family member 2-like [Anolis carolinensis]
CL3426.Contig1_CmRNA	1863	25	1.5312	gi|158293083|ref|XP_314361.4|	464	1e-129	AGAP004833-PA [Anopheles gambiae str. PEST] >gi|157016935|gb|EAA09718.4| AGAP004833-PA [Anopheles gambiae str. PEST]
CL3426.Contig2_CmRNA	1818	6	0.3766	gi|158293083|ref|XP_314361.4|	461	1e-128	AGAP004833-PA [Anopheles gambiae str. PEST] >gi|157016935|gb|EAA09718.4| AGAP004833-PA [Anopheles gambiae str. PEST]
CL3428.Contig1_CmRNA	624	7	1.2801	gi|237865270|gb|ACR25157.1|	118	2e-25	trypsin [Spodoptera frugiperda]
CL3428.Contig2_CmRNA	837	102	13.9056	gi|237865270|gb|ACR25157.1|	170	6e-41	trypsin [Spodoptera frugiperda]
CL3429.Contig1_CmRNA	701	28	4.5578	gi|328789600|ref|XP_393615.3|	294	3e-78	PREDICTED: GPI transamidase component PIG-T-like isoform 1 [Apis mellifera]
CL3429.Contig2_CmRNA	306	5	1.8645	gi|307201136|gb|EFN81047.1|	179	3e-44	GPI transamidase component PIG-T [Harpegnathos saltator]
CL343.Contig1_CmRNA	459	30	7.458	gi|307182516|gb|EFN69723.1|	180	2e-44	Death-associated protein 1 [Camponotus floridanus]
CL343.Contig2_CmRNA	452	8	2.0196	gi|307182516|gb|EFN69723.1|	180	2e-44	Death-associated protein 1 [Camponotus floridanus]
CL3432.Contig1_CmRNA	582	116	22.743	gi|112983152|ref|NP_001037038.1|	96.7	5e-19	heat shock protein 20.4 [Bombyx mori] >gi|49036077|gb|AAG30945.2|AF315318_1 heat shock protein hsp20.4 [Bombyx mori]
CL3433.Contig1_CmRNA	2019	564	31.8755	gi|126566036|gb|ABO20846.1|	875	0	trehalase-1 [Omphisa fuscidentalis]
CL3437.Contig1_CmRNA	294	1	0.3881	gi|328778735|ref|XP_623997.2|	144	2e-33	PREDICTED: ras-related protein Rab-11A [Apis mellifera]
CL3437.Contig2_CmRNA	293	2	0.7789	gi|328778735|ref|XP_623997.2|	144	2e-33	PREDICTED: ras-related protein Rab-11A [Apis mellifera]
CL3440.Contig1_CmRNA	2358	535	25.8895	gi|345480007|ref|XP_001603578.2|	886	0	PREDICTED: prolyl endopeptidase-like [Nasonia vitripennis]
CL3440.Contig2_CmRNA	1817	547	34.3515	gi|345480007|ref|XP_001603578.2|	810	0	PREDICTED: prolyl endopeptidase-like [Nasonia vitripennis]
CL3441.Contig1_CmRNA	1444	103	8.1392	gi|340728929|ref|XP_003402764.1|	175	4e-42	PREDICTED: serine protease gd-like isoform 1 [Bombus terrestris] >gi|340728931|ref|XP_003402765.1| PREDICTED: serine protease gd-like isoform 2 [Bombus terrestris]
CL3442.Contig1_CmRNA	514	5	1.11	gi|78707507|ref|NP_524218.4|	121	1e-26	neuromusculin, isoform A [Drosophila melanogaster] >gi|72004260|gb|AAF51887.4| neuromusculin, isoform A [Drosophila melanogaster]
CL3442.Contig2_CmRNA	472	14	3.3845	gi|78707507|ref|NP_524218.4|	129	3e-29	neuromusculin, isoform A [Drosophila melanogaster] >gi|72004260|gb|AAF51887.4| neuromusculin, isoform A [Drosophila melanogaster]
CL3445.Contig1_CmRNA	1036	25	2.7536	gi|91079830|ref|XP_970174.1|	239	2e-61	PREDICTED: similar to GA10531-PA [Tribolium castaneum]
CL3445.Contig2_CmRNA	823	26	3.6048	gi|307194687|gb|EFN76946.1|	218	3e-55	Serine/threonine-protein kinase D3 [Harpegnathos saltator]
CL3450.Contig1_CmRNA	513	4	0.8897	gi|340718488|ref|XP_003397698.1|	326	3e-88	PREDICTED: v-type proton ATPase 116 kDa subunit a isoform 1-like [Bombus terrestris]
CL3450.Contig2_CmRNA	488	2	0.4677	gi|156548606|ref|XP_001607815.1|	310	2e-83	PREDICTED: similar to vacuolar proton atpases isoform 3 [Nasonia vitripennis]
CL3461.Contig1_CmRNA	292	14	5.4709	gi|156551862|ref|XP_001604656.1|	146	3e-34	PREDICTED: organic cation transporter protein-like [Nasonia vitripennis]
CL3469.Contig1_CmRNA	1515	63	4.7451	gi|328786724|ref|XP_395500.4|	120	1e-25	PREDICTED: DNA replication licensing factor MCM8 [Apis mellifera]
CL347.Contig1_CmRNA	1529	277	20.6722	gi|58393741|ref|XP_320278.2|	455	1e-126	AGAP012261-PA [Anopheles gambiae str. PEST] >gi|55234400|gb|EAA00282.3| AGAP012261-PA [Anopheles gambiae str. PEST]
CL3472.Contig1_CmRNA	239	13	6.2067	gi|307172601|gb|EFN63960.1|	105	8e-22	Niemann-Pick C1 protein [Camponotus floridanus]
CL3475.Contig1_CmRNA	1655	20	1.3789	gi|66816791|gb|AAY56755.1|	72.4	7e-33	reverse transcriptase SR3-left [Schistosoma mansoni]
CL3475.Contig2_CmRNA	1633	13	0.9084	gi|66816791|gb|AAY56755.1|	76.3	5e-34	reverse transcriptase SR3-left [Schistosoma mansoni]
CL348.Contig1_CmRNA	881	47	6.0875	gi|307170839|gb|EFN62950.1|	103	1e-20	Laminin-like protein epi-1 [Camponotus floridanus]
CL348.Contig2_CmRNA	704	20	3.2417	gi|91094121|ref|XP_968249.1|	68.6	2e-10	PREDICTED: similar to 130 kDa EDT-soluble extracellular protein [Tribolium castaneum]
CL3480.Contig1_CmRNA	288	125	49.5258	gi|146327864|emb|CAM84319.1|	110	2e-23	chymotrypsinogen-like protein 4 [Manduca sexta]
CL3480.Contig2_CmRNA	277	106	43.6656	gi|146327864|emb|CAM84319.1|	108	7e-23	chymotrypsinogen-like protein 4 [Manduca sexta]
CL3484.Contig1_CmRNA	925	123	15.1732	gi|340716175|ref|XP_003396576.1|	235	2e-60	PREDICTED: ubiquinone biosynthesis protein COQ9, mitochondrial-like [Bombus terrestris]
CL3484.Contig2_CmRNA	880	20	2.5933	gi|340716175|ref|XP_003396576.1|	235	2e-60	PREDICTED: ubiquinone biosynthesis protein COQ9, mitochondrial-like [Bombus terrestris]
CL3488.Contig1_CmRNA	359	13	4.132	gi|195029833|ref|XP_001987776.1|	104	1e-21	GH19770 [Drosophila grimshawi] >gi|193903776|gb|EDW02643.1| GH19770 [Drosophila grimshawi]
CL3488.Contig2_CmRNA	329	1	0.3468	gi|195029833|ref|XP_001987776.1|	104	1e-21	GH19770 [Drosophila grimshawi] >gi|193903776|gb|EDW02643.1| GH19770 [Drosophila grimshawi]
CL3490.Contig1_CmRNA	534	9	1.9232	gi|213982801|ref|NP_001135572.1|	112	8e-24	ring finger protein 8 [Xenopus (Silurana) tropicalis]
CL3490.Contig2_CmRNA	488	11	2.5721	gi|291242845|ref|XP_002741316.1|	103	2e-21	PREDICTED: ring finger protein 8-like [Saccoglossus kowalevskii]
CL3494.Contig1_CmRNA	331	25	8.6184	gi|195046414|ref|XP_001992148.1|	75.9	5e-13	GH24370 [Drosophila grimshawi] >gi|193892989|gb|EDV91855.1| GH24370 [Drosophila grimshawi]
CL3496.Contig1_CmRNA	984	295	34.209	gi|262530078|gb|ACY69180.1|	442	1e-122	phosphoglucomutase [Spodoptera exigua]
CL35.Contig1_CmRNA	1413	185	14.9397	gi|170044218|ref|XP_001849752.1|	820	0	dynein heavy chain [Culex quinquefasciatus] >gi|167867449|gb|EDS30832.1| dynein heavy chain [Culex quinquefasciatus]
CL350.Contig1_CmRNA	608	45	8.4454	gi|91076070|ref|XP_967310.1|	122	8e-27	PREDICTED: similar to cation efflux protein/ zinc transporter [Tribolium castaneum]
CL350.Contig2_CmRNA	426	7	1.875	gi|91076070|ref|XP_967310.1|	122	4e-27	PREDICTED: similar to cation efflux protein/ zinc transporter [Tribolium castaneum]
CL3504.Contig1_CmRNA	1065	85	9.1072	gi|91079134|ref|XP_975446.1|	321	4e-86	PREDICTED: similar to pyrroline-5-carboxylate reductase [Tribolium castaneum]
CL3504.Contig2_CmRNA	947	149	17.9535	gi|91079134|ref|XP_975446.1|	321	3e-86	PREDICTED: similar to pyrroline-5-carboxylate reductase [Tribolium castaneum]
CL351.Contig1_CmRNA	980	7045	820.292	gi|290560853|ref|NP_001166790.1|	572	1e-162	cuticular protein glycine-rich 13 [Bombyx mori]
CL3511.Contig1_CmRNA	593	9	1.7318	gi|340711445|ref|XP_003394286.1|	329	5e-89	PREDICTED: spectrin alpha chain-like [Bombus terrestris]
CL3511.Contig2_CmRNA	569	30	6.0162	gi|340711445|ref|XP_003394286.1|	336	3e-91	PREDICTED: spectrin alpha chain-like [Bombus terrestris]
CL3514.Contig1_CmRNA	426	18	4.8214	gi|195161284|ref|XP_002021498.1|	129	4e-29	GL26481 [Drosophila persimilis] >gi|198472498|ref|XP_002133059.1| GA28879 [Drosophila pseudoobscura pseudoobscura] >gi|194103298|gb|EDW25341.1| GL26481 [Drosophila persimilis] >gi|198139040|gb|EDY70461.1| GA28879 [Drosophila pseudoobscura pseudoobscura]
CL3514.Contig2_CmRNA	372	4	1.227	gi|195161284|ref|XP_002021498.1|	129	4e-29	GL26481 [Drosophila persimilis] >gi|198472498|ref|XP_002133059.1| GA28879 [Drosophila pseudoobscura pseudoobscura] >gi|194103298|gb|EDW25341.1| GL26481 [Drosophila persimilis] >gi|198139040|gb|EDY70461.1| GA28879 [Drosophila pseudoobscura pseudoobscura]
CL3517.Contig1_CmRNA	1449	9	0.7087	gi|299930721|gb|ADJ58576.1|	481	1e-134	seminal fluid protein HACP038 [Heliconius melpomene]
CL3517.Contig2_CmRNA	1361	42	3.5213	gi|299930721|gb|ADJ58576.1|	386	1e-105	seminal fluid protein HACP038 [Heliconius melpomene]
CL3520.Contig1_CmRNA	447	25	6.3818	gi|333468560|gb|EGK96982.1|	163	2e-39	AGAP003238-PD [Anopheles gambiae str. PEST]
CL3520.Contig2_CmRNA	377	18	5.4481	gi|289743517|gb|ADD20506.1|	170	1e-41	differentiation-related protein 1 protein [Glossina morsitans morsitans]
CL3523.Contig1_CmRNA	567	49	9.8611	gi|333468083|gb|EAA08202.6|	290	2e-77	AGAP002644-PA [Anopheles gambiae str. PEST]
CL3523.Contig2_CmRNA	216	5	2.6414	gi|307189192|gb|EFN73640.1|	95.5	6e-19	Probable phospholipid-transporting ATPase ID [Camponotus floridanus]
CL3524.Contig1_CmRNA	765	48	7.1597	gi|338858970|gb|AEJ33049.1|	190	6e-47	lipid storage droplet protein 2 [Manduca sexta]
CL3524.Contig2_CmRNA	570	38	7.6072	gi|223890178|ref|NP_001138804.1|	291	1e-77	lipid storage droplet 2-like [Bombyx mori] >gi|221579612|gb|ACM24340.1| PLIN [Bombyx mori]
CL3526.Contig1_CmRNA	285	16	6.406	gi|117935405|gb|ABK57030.1|	75.5	7e-13	lipoprotein-like protein [Glyptapanteles indiensis]
CL3531.Contig1_CmRNA	481	434	102.958	gi|164420683|ref|NP_001106708.1|	306	2e-82	ribosomal protein S11 isoform 1 [Bombyx mori] >gi|54609303|gb|AAV34867.1| ribosomal protein S11-1 [Bombyx mori] >gi|268306470|gb|ACY95356.1| ribosomal protein S11-1 [Manduca sexta]
CL3531.Contig2_CmRNA	469	2389	581.242	gi|112982861|ref|NP_001037111.1|	295	4e-79	ribosomal protein S11 isoform 2 [Bombyx mori] >gi|51863340|gb|AAU11818.1| ribosomal protein S11 [Bombyx mori] >gi|54609305|gb|AAV34868.1| ribosomal protein S11-2 [Bombyx mori]
CL3533.Contig1_CmRNA	816	181	25.3106	gi|114053277|ref|NP_001040526.1|	347	5e-94	H+ transporting ATP synthase O subunit isoform 1 [Bombyx mori] >gi|95102854|gb|ABF51368.1| H+ transporting ATP synthase O subunit isoform 1 [Bombyx mori]
CL3533.Contig2_CmRNA	808	1015	143.34	gi|114053277|ref|NP_001040526.1|	347	5e-94	H+ transporting ATP synthase O subunit isoform 1 [Bombyx mori] >gi|95102854|gb|ABF51368.1| H+ transporting ATP synthase O subunit isoform 1 [Bombyx mori]
CL3534.Contig1_CmRNA	646	397	70.1248	gi|159524|gb|AAA29319.1|	125	1e-27	larval cuticle protein 14 [Manduca sexta]
CL3534.Contig2_CmRNA	493	145	33.561	gi|195126112|ref|XP_002007518.1|	118	8e-26	GI12994 [Drosophila mojavensis] >gi|193919127|gb|EDW17994.1| GI12994 [Drosophila mojavensis]
CL3537.Contig1_CmRNA	1224	441	41.1122	gi|158298482|ref|XP_318648.4|	407	1e-112	AGAP009619-PA [Anopheles gambiae str. PEST] >gi|157013903|gb|EAA14565.4| AGAP009619-PA [Anopheles gambiae str. PEST]
CL3537.Contig2_CmRNA	378	5	1.5094	gi|158298482|ref|XP_318648.4|	90.1	3e-17	AGAP009619-PA [Anopheles gambiae str. PEST] >gi|157013903|gb|EAA14565.4| AGAP009619-PA [Anopheles gambiae str. PEST]
CL3538.Contig1_CmRNA	414	9	2.4806	gi|332027704|gb|EGI67772.1|	179	4e-44	Abl interactor 2 [Acromyrmex echinatior]
CL3538.Contig2_CmRNA	381	8	2.396	gi|332027704|gb|EGI67772.1|	183	2e-45	Abl interactor 2 [Acromyrmex echinatior]
CL3547.Contig1_CmRNA	215	12	6.3688	gi|333466810|gb|EAA06034.4|	124	1e-27	AGAP003846-PA [Anopheles gambiae str. PEST]
CL3550.Contig1_CmRNA	348	845	277.071	gi|195046414|ref|XP_001992148.1|	85.5	6e-16	GH24370 [Drosophila grimshawi] >gi|193892989|gb|EDV91855.1| GH24370 [Drosophila grimshawi]
CL3552.Contig1_CmRNA	710	9	1.4464	gi|328781117|ref|XP_624798.3|	438	1e-121	PREDICTED: glycogenin-1-like [Apis mellifera]
CL3552.Contig2_CmRNA	638	9	1.6097	gi|307180053|gb|EFN68129.1|	371	1e-101	Glycogenin-1 [Camponotus floridanus]
CL3556.Contig1_CmRNA	324	16	5.6349	gi|340715630|ref|XP_003396313.1|	216	2e-55	PREDICTED: FACT complex subunit spt16-like [Bombus terrestris]
CL3556.Contig2_CmRNA	1275	217	19.4206	gi|332025790|gb|EGI65947.1|	805	0	FACT complex subunit spt16 [Acromyrmex echinatior]
CL3558.Contig1_CmRNA	559	15	3.0619	gi|307186141|gb|EFN71866.1|	283	2e-75	Growth hormone-regulated TBC protein 1-A [Camponotus floridanus]
CL3558.Contig2_CmRNA	425	2	0.537	gi|307186141|gb|EFN71866.1|	186	3e-46	Growth hormone-regulated TBC protein 1-A [Camponotus floridanus]
CL3559.Contig1_CmRNA	712	26	4.1668	gi|333468114|gb|EAL40879.3|	222	1e-56	AGAP002621-PA [Anopheles gambiae str. PEST]
CL3559.Contig2_CmRNA	676	4	0.6752	gi|198452589|ref|XP_001358853.2|	213	4e-54	GA15269 [Drosophila pseudoobscura pseudoobscura] >gi|198131991|gb|EAL27996.2| GA15269 [Drosophila pseudoobscura pseudoobscura]
CL356.Contig1_CmRNA	389	60	17.6001	gi|194902467|ref|XP_001980704.1|	66.6	3e-10	GG17423 [Drosophila erecta] >gi|190652407|gb|EDV49662.1| GG17423 [Drosophila erecta]
CL3561.Contig1_CmRNA	928	272	33.4453	gi|189234957|ref|XP_973182.2|	76.6	1e-12	PREDICTED: similar to CG17754 CG17754-PC [Tribolium castaneum]
CL3563.Contig1_CmRNA	1367	243	20.2839	gi|195019099|ref|XP_001984908.1|	55.8	5e-06	GH14786 [Drosophila grimshawi] >gi|193898390|gb|EDV97256.1| GH14786 [Drosophila grimshawi]
CL3569.Contig1_CmRNA	279	29	11.8606	gi|284413718|ref|NP_001165114.1|	172	5e-42	collagen [Bombyx mori]
CL3569.Contig2_CmRNA	279	37	15.1325	gi|284413718|ref|NP_001165114.1|	180	1e-44	collagen [Bombyx mori]
CL357.Contig1_CmRNA	238	6	2.8767	gi|307198665|gb|EFN79501.1|	126	3e-28	Probable hydroxyacid-oxoacid transhydrogenase, mitochondrial [Harpegnathos saltator]
CL357.Contig2_CmRNA	228	3	1.5014	gi|307198665|gb|EFN79501.1|	121	8e-27	Probable hydroxyacid-oxoacid transhydrogenase, mitochondrial [Harpegnathos saltator]
CL3576.Contig2_CmRNA	888	46	5.911	gi|307198377|gb|EFN79319.1|	134	5e-30	Chromodomain Y-like protein [Harpegnathos saltator]
CL358.Contig1_CmRNA	3071	1	0.0372	gi|307187348|gb|EFN72476.1|	512	1e-143	TWiK family of potassium channels protein 18 [Camponotus floridanus]
CL358.Contig2_CmRNA	3047	11	0.4119	gi|307187348|gb|EFN72476.1|	512	1e-143	TWiK family of potassium channels protein 18 [Camponotus floridanus]
CL358.Contig3_CmRNA	2530	1	0.0451	gi|307187348|gb|EFN72476.1|	504	1e-140	TWiK family of potassium channels protein 18 [Camponotus floridanus]
CL358.Contig4_CmRNA	2506	32	1.4571	gi|307187348|gb|EFN72476.1|	504	1e-140	TWiK family of potassium channels protein 18 [Camponotus floridanus]
CL3581.Contig1_CmRNA	1642	578	40.1669	gi|195571551|ref|XP_002103766.1|	95.5	7e-18	GD20599 [Drosophila simulans] >gi|194199693|gb|EDX13269.1| GD20599 [Drosophila simulans]
CL3582.Contig1_CmRNA	342	20	6.6729	gi|156968307|gb|ABU98625.1|	96.3	4e-19	carboxypeptidase [Helicoverpa armigera]
CL3583.Contig1_CmRNA	488	1378	322.213	gi|291480639|gb|ADE06397.1|	58.9	8e-08	peritrophin type-A domain protein 2 [Mamestra configurata]
CL3585.Contig1_CmRNA	1103	45	4.6553	gi|25143299|ref|NP_492875.2|	75.1	5e-12	SR protein related family member (rsr-1) [Caenorhabditis elegans] >gi|19571645|emb|CAB04214.3| C. elegans protein F28D9.1, partially confirmed by transcript evidence [Caenorhabditis elegans]
CL3585.Contig2_CmRNA	1746	601	39.2775	gi|46227103|gb|EAK88053.1|	173	2e-41	large low complexity protein with proline/alanine-rich repeat [Cryptosporidium parvum Iowa II]
CL3585.Contig3_CmRNA	854	19	2.5387	gi|154344449|ref|XP_001568166.1|	63.9	1e-13	proteophosphoglycan ppg4 [Leishmania braziliensis MHOM/BR/75/M2904] >gi|134065503|emb|CAM43270.1| proteophosphoglycan ppg4 [Leishmania braziliensis MHOM/BR/75/M2904]
CL3586.Contig1_CmRNA	531	0	0	gi|270004889|gb|EFA01337.1|	269	4e-71	mirror [Tribolium castaneum]
CL3586.Contig2_CmRNA	482	6	1.4204	gi|270004889|gb|EFA01337.1|	269	3e-71	mirror [Tribolium castaneum]
CL3588.Contig1_CmRNA	232	4	1.9674	gi|60459510|gb|AAX20091.1|	71.2	1e-11	chitin synthase 2 [Manduca sexta] >gi|60459512|gb|AAX20092.1| chitin synthase 2 [Manduca sexta]
CL3589.Contig1_CmRNA	477	2548	609.529	gi|195132318|ref|XP_002010590.1|	59.3	5e-08	GI21630 [Drosophila mojavensis] >gi|193907378|gb|EDW06245.1| GI21630 [Drosophila mojavensis]
CL36.Contig1_CmRNA	1201	23	2.1852	gi|307180960|gb|EFN68748.1|	600	1e-170	RNA-binding protein 39 [Camponotus floridanus]
CL36.Contig2_CmRNA	1075	7	0.743	gi|340718900|ref|XP_003397900.1|	536	1e-151	PREDICTED: RNA-binding protein 39-like isoform 2 [Bombus terrestris]
CL3600.Contig1_CmRNA	1572	69	5.0085	gi|307204969|gb|EFN83508.1|	249	3e-64	cAMP-responsive element-binding protein 3-like protein 4 [Harpegnathos saltator]
CL3600.Contig2_CmRNA	1403	54	4.3919	gi|307204969|gb|EFN83508.1|	250	1e-64	cAMP-responsive element-binding protein 3-like protein 4 [Harpegnathos saltator]
CL3603.Contig1_CmRNA	1497	372	28.3553	gi|170046911|ref|XP_001850988.1|	306	2e-81	zinc carboxypeptidase [Culex quinquefasciatus] >gi|167869496|gb|EDS32879.1| zinc carboxypeptidase [Culex quinquefasciatus]
CL3608.Contig1_CmRNA	770	353	52.3116	gi|170063054|ref|XP_001866937.1|	103	8e-21	scavenger receptor cysteine-rich protein [Culex quinquefasciatus] >gi|167880823|gb|EDS44206.1| scavenger receptor cysteine-rich protein [Culex quinquefasciatus]
CL361.Contig1_CmRNA	2490	4334	198.611	gi|112983246|ref|NP_001037010.1|	389	1e-106	small GTP-binding protein [Bombyx mori] >gi|2338554|gb|AAB67169.1| small GTP-binding protein [Bombyx mori]
CL3616.Contig1_CmRNA	809	15	2.1157	gi|291486765|dbj|BAI87832.1|	359	9e-98	black [Papilio xuthus]
CL3616.Contig2_CmRNA	800	7	0.9984	gi|291486765|dbj|BAI87832.1|	359	9e-98	black [Papilio xuthus]
CL3617.Contig1_CmRNA	1540	6	0.4446	gi|71648919|ref|XP_813237.1|	203	2e-50	trans-sialidase [Trypanosoma cruzi strain CL Brener]
CL3617.Contig2_CmRNA	1525	18	1.3468	gi|343472858|emb|CCD15099.1|	199	2e-49	Putative cell surface-expressed gene family [Trypanosoma congolense IL3000]
CL362.Contig1_CmRNA	601	10	1.8986	gi|328790445|ref|XP_001122792.2|	91.3	2e-17	PREDICTED: lipid phosphate phosphohydrolase 3-like [Apis mellifera]
CL362.Contig2_CmRNA	498	6	1.3748	gi|328790445|ref|XP_001122792.2|	91.3	2e-17	PREDICTED: lipid phosphate phosphohydrolase 3-like [Apis mellifera]
CL3620.Contig1_CmRNA	1411	263	21.2688	gi|328697846|ref|XP_003240457.1|	192	3e-47	PREDICTED: carboxypeptidase E-like [Acyrthosiphon pisum]
CL3625.Contig1_CmRNA	303	130	48.957	gi|299930629|gb|ADJ58530.1|	64.7	1e-09	seminal fluid protein HACP028 [Heliconius erato]
CL3625.Contig2_CmRNA	312	117	42.7903	gi|299930629|gb|ADJ58530.1|	63.2	3e-09	seminal fluid protein HACP028 [Heliconius erato]
CL3627.Contig1_CmRNA	356	3	0.9616	gi|333469067|gb|EAA09281.5|	64.7	1e-09	AGAP004431-PA [Anopheles gambiae str. PEST]
CL3627.Contig2_CmRNA	337	5	1.693	gi|333469067|gb|EAA09281.5|	90.5	2e-17	AGAP004431-PA [Anopheles gambiae str. PEST]
CL3629.Contig1_CmRNA	979	27	3.147	gi|219362829|ref|NP_001136443.1|	539	1e-152	clathrin heavy chain [Bombyx mori] >gi|218563475|dbj|BAH03459.1| clathrin [Bombyx mori]
CL3629.Contig2_CmRNA	973	63	7.3882	gi|219362829|ref|NP_001136443.1|	539	1e-152	clathrin heavy chain [Bombyx mori] >gi|218563475|dbj|BAH03459.1| clathrin [Bombyx mori]
CL363.Contig1_CmRNA	1005	656	74.482	gi|270297226|ref|NP_001161923.1|	170	8e-41	peritrophic matrix protein 1-C [Tribolium castaneum] >gi|268309030|gb|ACY95481.1| peritrophic matrix protein 1-C [Tribolium castaneum]
CL363.Contig2_CmRNA	797	286	40.9469	gi|270297226|ref|NP_001161923.1|	170	6e-41	peritrophic matrix protein 1-C [Tribolium castaneum] >gi|268309030|gb|ACY95481.1| peritrophic matrix protein 1-C [Tribolium castaneum]
CL3632.Contig1_CmRNA	746	29	4.4358	gi|345489285|ref|XP_003426091.1|	397	1e-109	PREDICTED: LIM domain-binding protein 2-like isoform 2 [Nasonia vitripennis]
CL3632.Contig2_CmRNA	728	64	10.0314	gi|345489285|ref|XP_003426091.1|	404	1e-111	PREDICTED: LIM domain-binding protein 2-like isoform 2 [Nasonia vitripennis]
CL3633.Contig1_CmRNA	1376	40	3.3171	gi|29169172|gb|AAO66461.1|	61.2	7e-11	pG1 protein [Homo sapiens]
CL3633.Contig2_CmRNA	1274	3	0.2687	gi|29169172|gb|AAO66461.1|	61.2	7e-11	pG1 protein [Homo sapiens]
CL3635.Contig1_CmRNA	1499	201	15.3006	gi|158292674|ref|XP_001688510.1|	388	1e-106	AGAP005160-PA [Anopheles gambiae str. PEST] >gi|158292678|ref|XP_001688512.1| AGAP005160-PB [Anopheles gambiae str. PEST] >gi|157017103|gb|EDO64093.1| AGAP005160-PA [Anopheles gambiae str. PEST] >gi|157017105|gb|EDO64095.1| AGAP005160-PB [Anopheles gambiae str. PEST]
CL3635.Contig2_CmRNA	1420	302	24.2679	gi|158292674|ref|XP_001688510.1|	384	1e-105	AGAP005160-PA [Anopheles gambiae str. PEST] >gi|158292678|ref|XP_001688512.1| AGAP005160-PB [Anopheles gambiae str. PEST] >gi|157017103|gb|EDO64093.1| AGAP005160-PA [Anopheles gambiae str. PEST] >gi|157017105|gb|EDO64095.1| AGAP005160-PB [Anopheles gambiae str. PEST]
CL3639.Contig1_CmRNA	1384	3182	262.348	gi|66525285|ref|XP_392071.2|	636	0	PREDICTED: 60S ribosomal protein L4 isoform 1 [Apis mellifera]
CL3643.Contig1_CmRNA	571	57	11.3908	gi|12597214|dbj|BAB21511.1|	116	5e-25	TRAS3 [Bombyx mori]
CL3643.Contig2_CmRNA	396	21	6.0511	gi|12597214|dbj|BAB21511.1|	84.3	1e-15	TRAS3 [Bombyx mori]
CL3644.Contig1_CmRNA	870	122	16.0013	gi|3970750|emb|CAA10110.1|	567	1e-160	cyclic nucleotide and voltage-activated ion channel [Heliothis virescens]
CL3645.Contig1_CmRNA	379	123	37.0322	gi|91088881|ref|XP_966958.1|	54.3	2e-06	PREDICTED: similar to splicing factor 3a, subunit 2 isoform 1 [Tribolium castaneum]
CL3646.Contig1_CmRNA	1460	726	56.7411	gi|323530564|gb|ADX95747.1|	516	1e-144	NADPH cytochrome b5 reductase [Spodoptera exigua]
CL3648.Contig1_CmRNA	978	15	1.7501	gi|114052330|ref|NP_001040239.1|	480	1e-134	coproporphirynogen oxidase [Bombyx mori] >gi|87248475|gb|ABD36290.1| coproporphirynogen oxidase [Bombyx mori]
CL3648.Contig2_CmRNA	912	23	2.8777	gi|114052330|ref|NP_001040239.1|	493	1e-138	coproporphirynogen oxidase [Bombyx mori] >gi|87248475|gb|ABD36290.1| coproporphirynogen oxidase [Bombyx mori]
CL3649.Contig1_CmRNA	274	49	20.4061	gi|195053828|ref|XP_001993828.1|	135	7e-31	GH19024 [Drosophila grimshawi] >gi|193895698|gb|EDV94564.1| GH19024 [Drosophila grimshawi]
CL3649.Contig2_CmRNA	1463	3837	299.269	gi|195053828|ref|XP_001993828.1|	436	1e-120	GH19024 [Drosophila grimshawi] >gi|193895698|gb|EDV94564.1| GH19024 [Drosophila grimshawi]
CL3651.Contig1_CmRNA	925	11	1.357	gi|307196731|gb|EFN78190.1|	362	2e-98	LIM domain and actin-binding protein 1 [Harpegnathos saltator]
CL3651.Contig2_CmRNA	742	7	1.0765	gi|307196731|gb|EFN78190.1|	354	2e-96	LIM domain and actin-binding protein 1 [Harpegnathos saltator]
CL3652.Contig1_CmRNA	1989	204	11.7033	gi|89276819|gb|ABD66603.1|	124	2e-26	major ampullate spidroin 2 [Latrodectus hesperus]
CL3652.Contig2_CmRNA	2138	114	6.0843	gi|89276819|gb|ABD66603.1|	129	6e-28	major ampullate spidroin 2 [Latrodectus hesperus]
CL3656.Contig1_CmRNA	789	369	53.3658	gi|283580029|gb|ADB27912.1|	343	5e-93	Arp2/3 complex p21 subunit [Spodoptera frugiperda]
CL3659.Contig1_CmRNA	307	28	10.4072	gi|307176880|gb|EFN66221.1|	113	3e-24	Anamorsin [Camponotus floridanus]
CL3659.Contig2_CmRNA	256	2	0.8915	gi|332020882|gb|EGI61280.1|	68.6	8e-11	Anamorsin [Acromyrmex echinatior]
CL3661.Contig1_CmRNA	1107	114	11.7509	gi|170042097|ref|XP_001848775.1|	732	0	histone deacetylase Rpd3 [Culex quinquefasciatus] >gi|167865633|gb|EDS29016.1| histone deacetylase Rpd3 [Culex quinquefasciatus]
CL3666.Contig1_CmRNA	532	15	3.2173	gi|52878|emb|CAA37668.1|	46.2	2e-06	formin [Mus musculus] >gi|227109|prf||1614337A formin
CL3668.Contig3_CmRNA	2116	411	22.1636	gi|114051682|ref|NP_001040173.1|	348	8e-94	calcium-binding protein p22 [Bombyx mori] >gi|87248283|gb|ABD36194.1| calcium-binding protein p22 [Bombyx mori] >gi|225346701|gb|ACN86373.1| calcium-binding protein [Bombyx mandarina]
CL367.Contig1_CmRNA	1303	5	0.4379	gi|170040767|ref|XP_001848159.1|	310	1e-82	phosphomannomutase [Culex quinquefasciatus] >gi|167864370|gb|EDS27753.1| phosphomannomutase [Culex quinquefasciatus]
CL367.Contig2_CmRNA	1283	1	0.0889	gi|170040767|ref|XP_001848159.1|	310	1e-82	phosphomannomutase [Culex quinquefasciatus] >gi|167864370|gb|EDS27753.1| phosphomannomutase [Culex quinquefasciatus]
CL367.Contig3_CmRNA	1191	2	0.1916	gi|170040767|ref|XP_001848159.1|	310	9e-83	phosphomannomutase [Culex quinquefasciatus] >gi|167864370|gb|EDS27753.1| phosphomannomutase [Culex quinquefasciatus]
CL367.Contig4_CmRNA	1171	4	0.3898	gi|170040767|ref|XP_001848159.1|	310	8e-83	phosphomannomutase [Culex quinquefasciatus] >gi|167864370|gb|EDS27753.1| phosphomannomutase [Culex quinquefasciatus]
CL3670.Contig1_CmRNA	558	49	10.0202	gi|194763301|ref|XP_001963771.1|	57.4	3e-07	GF21083 [Drosophila ananassae] >gi|190618696|gb|EDV34220.1| GF21083 [Drosophila ananassae]
CL3670.Contig2_CmRNA	532	14	3.0028	gi|194763301|ref|XP_001963771.1|	57.4	3e-07	GF21083 [Drosophila ananassae] >gi|190618696|gb|EDV34220.1| GF21083 [Drosophila ananassae]
CL3674.Contig1_CmRNA	1569	163	11.8544	gi|157117593|ref|XP_001658842.1|	511	1e-143	ATP-dependent RNA helicase [Aedes aegypti] >gi|108875986|gb|EAT40211.1| ATP-dependent RNA helicase [Aedes aegypti]
CL3676.Contig1_CmRNA	231	25	12.3493	gi|115916091|ref|XP_001198200.1|	43.5	1e-09	PREDICTED: similar to protein F28E10.3 [imported] - Caenorhabditis elegans [Strongylocentrotus purpuratus] >gi|115974535|ref|XP_001187905.1| PREDICTED: similar to protein F28E10.3 [imported] - Caenorhabditis elegans [Strongylocentrotus purpuratus]
CL3677.Contig1_CmRNA	568	25	5.0223	gi|156553974|ref|XP_001602993.1|	214	2e-54	PREDICTED: ras-related protein Rab-5A-like isoform 1 [Nasonia vitripennis] >gi|345492181|ref|XP_003426794.1| PREDICTED: ras-related protein Rab-5A-like isoform 2 [Nasonia vitripennis] >gi|345492184|ref|XP_003426795.1| PREDICTED: ras-related protein Rab-5A-like isoform 3 [Nasonia vitripennis]
CL3677.Contig2_CmRNA	389	3	0.88	gi|156553974|ref|XP_001602993.1|	214	1e-54	PREDICTED: ras-related protein Rab-5A-like isoform 1 [Nasonia vitripennis] >gi|345492181|ref|XP_003426794.1| PREDICTED: ras-related protein Rab-5A-like isoform 2 [Nasonia vitripennis] >gi|345492184|ref|XP_003426795.1| PREDICTED: ras-related protein Rab-5A-like isoform 3 [Nasonia vitripennis]
CL3682.Contig1_CmRNA	2239	442	22.5259	gi|91078176|ref|XP_967241.1|	672	0	PREDICTED: similar to AGAP010734-PA [Tribolium castaneum]
CL3682.Contig2_CmRNA	838	34	4.6297	gi|328707938|ref|XP_001949485.2|	141	4e-32	PREDICTED: peroxidase-like [Acyrthosiphon pisum]
CL3683.Contig1_CmRNA	1454	139	10.9085	gi|340728972|ref|XP_003402785.1|	750	0	PREDICTED: counting factor associated protein D-like [Bombus terrestris]
CL3683.Contig2_CmRNA	954	2	0.2392	gi|340728972|ref|XP_003402785.1|	486	1e-136	PREDICTED: counting factor associated protein D-like [Bombus terrestris]
CL3686.Contig1_CmRNA	1435	80	6.3614	gi|91088561|ref|XP_972897.1|	419	1e-115	PREDICTED: similar to AGAP009788-PA [Tribolium castaneum]
CL3686.Contig2_CmRNA	1480	136	10.4855	gi|91088561|ref|XP_972897.1|	419	1e-115	PREDICTED: similar to AGAP009788-PA [Tribolium castaneum]
CL3687.Contig1_CmRNA	704	153	24.7989	gi|189241478|ref|XP_001807906.1|	193	5e-48	PREDICTED: similar to munc13-4 [Tribolium castaneum]
CL3688.Contig1_CmRNA	1285	200	17.7599	gi|153791757|ref|NP_001093275.1|	487	1e-136	myo-inositol oxygenase [Bombyx mori] >gi|95102966|gb|ABF51424.1| myo-inositol oxygenase [Bombyx mori]
CL3688.Contig2_CmRNA	258	22	9.7301	gi|153791757|ref|NP_001093275.1|	180	2e-44	myo-inositol oxygenase [Bombyx mori] >gi|95102966|gb|ABF51424.1| myo-inositol oxygenase [Bombyx mori]
CL3688.Contig3_CmRNA	1002	61	6.9467	gi|153791757|ref|NP_001093275.1|	502	1e-141	myo-inositol oxygenase [Bombyx mori] >gi|95102966|gb|ABF51424.1| myo-inositol oxygenase [Bombyx mori]
CL369.Contig1_CmRNA	714	88	14.0637	gi|256772701|emb|CBB07053.1|	330	5e-89	CYP6AE30 protein [Cnaphalocrocis medinalis]
CL369.Contig2_CmRNA	290	139	54.6928	gi|256772701|emb|CBB07053.1|	159	3e-38	CYP6AE30 protein [Cnaphalocrocis medinalis]
CL369.Contig3_CmRNA	1714	3908	260.17	gi|256772701|emb|CBB07053.1|	790	0	CYP6AE30 protein [Cnaphalocrocis medinalis]
CL369.Contig4_CmRNA	1671	1228	83.8563	gi|256772701|emb|CBB07053.1|	976	0	CYP6AE30 protein [Cnaphalocrocis medinalis]
CL369.Contig5_CmRNA	268	70	29.8042	gi|256772701|emb|CBB07053.1|	141	1e-32	CYP6AE30 protein [Cnaphalocrocis medinalis]
CL3690.Contig1_CmRNA	2293	151	7.5143	gi|170051245|ref|XP_001861677.1|	68.2	2e-09	conserved hypothetical protein [Culex quinquefasciatus] >gi|167872554|gb|EDS35937.1| conserved hypothetical protein [Culex quinquefasciatus]
CL3691.Contig1_CmRNA	1218	85	7.9632	gi|328781627|ref|XP_003250006.1|	126	2e-44	PREDICTED: FUN14 domain-containing protein 1-like isoform 1 [Apis mellifera]
CL3691.Contig2_CmRNA	1100	139	14.419	gi|328781627|ref|XP_003250006.1|	197	6e-49	PREDICTED: FUN14 domain-containing protein 1-like isoform 1 [Apis mellifera]
[truncated: 23,283 more rows]
