# Supplementary material for: Transcriptome and Gene Expression Analysis of the Rice Leaf Folder, Cnaphalocrosis medinalis
Source: PLoS One. 2012 Nov 19;7(11):e47401. doi: 10.1371/journal.pone.0047401 (PMC3501527; doi:10.1371/journal.pone.0047401)
Supplement: Table S3 — GO annotation of unigenes. (XLS) [file pone.0047401.s006.xls]

## Sheet: CmRNA-Unigene.fa.gene2GO
Supplementary Table S3. GO annotation of unigenes.
geneID	GO
CL1146.Contig1_CmRNA	GO:0005488	GO:0032502	GO:0009987
CL1153.Contig1_CmRNA	GO:0046914	GO:0003676	GO:0043231	GO:0007480	GO:0007365
CL1153.Contig2_CmRNA	GO:0046914	GO:0003676	GO:0043231	GO:0007480	GO:0007365
CL1156.Contig1_CmRNA	GO:0003676	GO:0034061	GO:0004518	GO:0006260
CL1157.Contig1_CmRNA	GO:0016301
CL1157.Contig2_CmRNA	GO:0016301
CL1166.Contig1_CmRNA	GO:0005488	GO:0050954	GO:0008088	GO:0000226	GO:0003774	GO:0005871	GO:0042384	GO:0003006
CL1166.Contig2_CmRNA	GO:0008092	GO:0050954	GO:0008088	GO:0000226	GO:0003774	GO:0005871	GO:0042384	GO:0003006
CL1168.Contig1_CmRNA	GO:0005488
CL1170.Contig1_CmRNA	GO:0070011
CL1173.Contig1_CmRNA	GO:0010467	GO:0022613	GO:0015934	GO:0005198
CL1181.Contig1_CmRNA	GO:0030528	GO:0043231	GO:0006355
CL1181.Contig2_CmRNA	GO:0030528	GO:0043231	GO:0006355
CL1189.Contig1_CmRNA	GO:0003723	GO:0016055	GO:0060746	GO:0006357	GO:0031981	GO:0016585	GO:0006461	GO:0000785	GO:0000166	GO:0019904	GO:0008283
CL1189.Contig2_CmRNA	GO:0043231	GO:0003676
CL1190.Contig1_CmRNA	GO:0005488	GO:0043231	GO:0006281	GO:0016567	GO:0031572
CL1190.Contig2_CmRNA	GO:0005488	GO:0043231	GO:0006281	GO:0016567	GO:0031572
CL1192.Contig1_CmRNA	GO:0072503	GO:0015075	GO:0006811	GO:0016020
CL1192.Contig2_CmRNA	GO:0072503	GO:0015075	GO:0006811	GO:0016020
CL1216.Contig1_CmRNA	GO:0007417	GO:0007126	GO:0003676	GO:0031981	GO:0009719	GO:0002164	GO:0033554	GO:0010259	GO:0000785	GO:0040009	GO:0007599	GO:0009653	GO:0034728	GO:0009790
CL1216.Contig2_CmRNA	GO:0007417	GO:0007126	GO:0003676	GO:0031981	GO:0009719	GO:0002164	GO:0033554	GO:0010259	GO:0000785	GO:0040009	GO:0007599	GO:0009653	GO:0034728	GO:0009790
CL1233.Contig1_CmRNA	GO:0003676	GO:0034061	GO:0006260
CL1233.Contig2_CmRNA	GO:0003824
CL1238.Contig1_CmRNA	GO:0016744	GO:0006007	GO:0044424
CL1238.Contig2_CmRNA	GO:0016744	GO:0006007	GO:0044424
CL1246.Contig1_CmRNA	GO:0030532	GO:0005088	GO:0050804	GO:0045202	GO:0007266	GO:0016020
CL1252.Contig1_CmRNA	GO:0004872
CL1254.Contig2_CmRNA	GO:0044238	GO:0044260	GO:0003824
CL1259.Contig1_CmRNA	GO:0005488	GO:0003824
CL1259.Contig2_CmRNA	GO:0005488	GO:0016740
CL1263.Contig1_CmRNA	GO:0048736	GO:0071944	GO:0030198
CL1265.Contig1_CmRNA	GO:0016740
CL1269.Contig1_CmRNA	GO:0044464
CL1278.Contig1_CmRNA	GO:0046872
CL1278.Contig2_CmRNA	GO:0016491	GO:0005506
CL1280.Contig3_CmRNA	GO:0006952
CL1282.Contig2_CmRNA	GO:0009987	GO:0006810
CL1288.Contig1_CmRNA	GO:0003676
CL1288.Contig2_CmRNA	GO:0003676
CL1291.Contig1_CmRNA	GO:0016811
CL1291.Contig2_CmRNA	GO:0016811
CL1292.Contig1_CmRNA	GO:0046914
CL1296.Contig2_CmRNA	GO:0005488	GO:0016787	GO:0044464
CL1304.Contig1_CmRNA	GO:0016787
CL1309.Contig1_CmRNA	GO:0005488	GO:0031981
CL1309.Contig2_CmRNA	GO:0005488
CL1310.Contig1_CmRNA	GO:0000278	GO:0006259	GO:0051297	GO:0006464	GO:0043231	GO:0019787	GO:0032559
CL1310.Contig2_CmRNA	GO:0000278	GO:0006259	GO:0051297	GO:0006464	GO:0043231	GO:0019787	GO:0032559
CL1314.Contig1_CmRNA	GO:0003824
CL1314.Contig2_CmRNA	GO:0003824
CL1318.Contig1_CmRNA	GO:0005488	GO:0044238	GO:0044260	GO:0032501
CL1319.Contig1_CmRNA	GO:0007411	GO:0008092	GO:0006996	GO:0050807	GO:0044459	GO:0044444
CL1329.Contig1_CmRNA	GO:0060089	GO:0050953	GO:0031234	GO:0007166	GO:0017111	GO:0042995
CL1329.Contig2_CmRNA	GO:0060089	GO:0050953	GO:0031234	GO:0007166	GO:0017111	GO:0042995
CL1330.Contig1_CmRNA	GO:0030246	GO:0004871
CL1330.Contig2_CmRNA	GO:0030246	GO:0004871
CL1333.Contig1_CmRNA	GO:0015078	GO:0016471	GO:0015986	GO:0015662	GO:0005768	GO:0019829	GO:0015988	GO:0032559
CL1333.Contig2_CmRNA	GO:0015078	GO:0016471	GO:0015986	GO:0015662	GO:0005768	GO:0019829	GO:0015988	GO:0032559
CL1336.Contig1_CmRNA	GO:0016453
CL1344.Contig2_CmRNA	GO:0003824
CL1351.Contig1_CmRNA	GO:0007166	GO:0031224	GO:0004888
CL1353.Contig1_CmRNA	GO:0004175	GO:0046914	GO:0017046	GO:0043171	GO:0017111	GO:0060089	GO:0030162	GO:0003006	GO:0000267	GO:0042165	GO:0009100	GO:0023052	GO:0009207	GO:0042802	GO:0032559	GO:0000502	GO:0030163	GO:0044439	GO:0051260	GO:0044421
CL1353.Contig2_CmRNA	GO:0004175	GO:0046914	GO:0017046	GO:0043171	GO:0017111	GO:0060089	GO:0030162	GO:0003006	GO:0000267	GO:0042165	GO:0009100	GO:0023052	GO:0009207	GO:0042802	GO:0032559	GO:0000502	GO:0030163	GO:0044439	GO:0051260	GO:0044421
CL1355.Contig1_CmRNA	GO:0009057	GO:0019538	GO:0005838	GO:0070011	GO:0017111	GO:0032559
CL1355.Contig2_CmRNA	GO:0044424	GO:0009057	GO:0016462	GO:0032559
CL1358.Contig1_CmRNA	GO:0035194	GO:0046914
CL1358.Contig2_CmRNA	GO:0035194	GO:0046914
CL1360.Contig1_CmRNA	GO:0005488	GO:0043231	GO:0008219	GO:0004175	GO:0010259	GO:0019538	GO:0044444	GO:0010033	GO:0005886
CL1360.Contig2_CmRNA	GO:0005488	GO:0043231	GO:0008219	GO:0004175	GO:0010259	GO:0019538	GO:0044444	GO:0010033	GO:0005886
CL1361.Contig1_CmRNA	GO:0008152	GO:0004312
CL1361.Contig2_CmRNA	GO:0008152	GO:0004312
CL1363.Contig2_CmRNA	GO:0009987
CL1363.Contig4_CmRNA	GO:0009987
CL1369.Contig3_CmRNA	GO:0044260	GO:0044238	GO:0050794	GO:0005488
CL1370.Contig1_CmRNA	GO:0005737	GO:0006412
CL1374.Contig1_CmRNA	GO:0008152	GO:0003824
CL1376.Contig1_CmRNA	GO:0035194	GO:0005634
CL1376.Contig2_CmRNA	GO:0070918	GO:0005681	GO:0045069	GO:0035195
CL1376.Contig3_CmRNA	GO:0070918	GO:0005681	GO:0045069	GO:0035195
CL1376.Contig4_CmRNA	GO:0006396	GO:0005681	GO:0042221	GO:0035194	GO:0045069
CL1377.Contig1_CmRNA	GO:0004553	GO:0006952	GO:0008219	GO:0009056
CL1377.Contig2_CmRNA	GO:0004553	GO:0006952	GO:0008219	GO:0009056
CL1387.Contig1_CmRNA	GO:0044267	GO:0044424	GO:0050896	GO:0005515	GO:0032559
CL1387.Contig2_CmRNA	GO:0044267	GO:0044424	GO:0050896	GO:0005515	GO:0032559
CL1387.Contig3_CmRNA	GO:0044267	GO:0044424	GO:0050896	GO:0005515	GO:0032559
CL1387.Contig4_CmRNA	GO:0044267	GO:0044424	GO:0050896	GO:0005515	GO:0032559
CL1389.Contig1_CmRNA	GO:0030246
CL1389.Contig2_CmRNA	GO:0030246
CL1399.Contig1_CmRNA	GO:0032561	GO:0017111	GO:0060089	GO:0046669	GO:0016198	GO:0031234	GO:0002251	GO:0016028	GO:0010863	GO:0006464	GO:0007186	GO:0009266	GO:0007606
CL1399.Contig2_CmRNA	GO:0007166	GO:0032561	GO:0006464	GO:0060089
CL1399.Contig3_CmRNA	GO:0007166	GO:0032561	GO:0006464	GO:0060089
CL1399.Contig4_CmRNA	GO:0007166	GO:0032561	GO:0006464	GO:0060089
CL1399.Contig5_CmRNA	GO:0032561	GO:0017111	GO:0060089	GO:0046669	GO:0016198	GO:0031234	GO:0002251	GO:0016028	GO:0010863	GO:0006464	GO:0007186	GO:0009266	GO:0007606
CL1399.Contig6_CmRNA	GO:0007166	GO:0032561	GO:0006464	GO:0060089
CL1399.Contig7_CmRNA	GO:0007166	GO:0032561	GO:0006464	GO:0060089
CL1399.Contig8_CmRNA	GO:0007166	GO:0032561	GO:0006464	GO:0060089
CL1406.Contig2_CmRNA	GO:0003676
CL1410.Contig1_CmRNA	GO:0006351
CL1410.Contig2_CmRNA	GO:0006351
CL1419.Contig1_CmRNA	GO:0032501
CL1420.Contig1_CmRNA	GO:0016491	GO:0008152	GO:0005506
CL1420.Contig2_CmRNA	GO:0016491	GO:0008152	GO:0005506
CL1422.Contig1_CmRNA	GO:0008038	GO:0048675	GO:0043005	GO:0044297	GO:0007420	GO:0006935	GO:0042802	GO:0006897	GO:0043498	GO:0004888
CL1422.Contig2_CmRNA	GO:0008038	GO:0048675	GO:0043005	GO:0044297	GO:0007420	GO:0006935	GO:0042802	GO:0006897	GO:0043498	GO:0004888
CL1424.Contig1_CmRNA	GO:0009058	GO:0010467	GO:0044267	GO:0016741
CL1424.Contig2_CmRNA	GO:0009058	GO:0043231	GO:0010467	GO:0044267	GO:0016741
CL1427.Contig1_CmRNA	GO:0009987	GO:0044464
CL1427.Contig2_CmRNA	GO:0009987	GO:0044464
CL1431.Contig1_CmRNA	GO:0016874
CL1431.Contig2_CmRNA	GO:0003824
CL1434.Contig1_CmRNA	GO:0043231	GO:0003676	GO:0044427	GO:0042623	GO:0006325	GO:0032559
CL1434.Contig2_CmRNA	GO:0044427	GO:0006325	GO:0003676	GO:0043231	GO:0042623	GO:0032559
CL1442.Contig1_CmRNA	GO:0016491	GO:0008152
CL1443.Contig1_CmRNA	GO:0015630
CL1443.Contig2_CmRNA	GO:0015630
CL1443.Contig3_CmRNA	GO:0015630	GO:0008092	GO:0009888
CL1443.Contig4_CmRNA	GO:0015630
CL1443.Contig5_CmRNA	GO:0015630
CL1443.Contig6_CmRNA	GO:0015630
CL1443.Contig7_CmRNA	GO:0015630	GO:0008092	GO:0009888
CL1443.Contig8_CmRNA	GO:0015630	GO:0008092	GO:0009888
CL1443.Contig9_CmRNA	GO:0015630	GO:0008092	GO:0009888
CL1445.Contig1_CmRNA	GO:0009987	GO:0005515	GO:0065007
CL1445.Contig2_CmRNA	GO:0009987	GO:0005515	GO:0065007
CL1457.Contig1_CmRNA	GO:0034728	GO:0043231
CL1457.Contig2_CmRNA	GO:0043231	GO:0005515	GO:0007275	GO:0034728	GO:0065003
CL1464.Contig1_CmRNA	GO:0000377	GO:0005681	GO:0003723
CL1464.Contig2_CmRNA	GO:0000377	GO:0005681	GO:0003723	GO:0003824
CL1471.Contig1_CmRNA	GO:0031224	GO:0017111	GO:0006811	GO:0009207	GO:0015405	GO:0032559
CL1471.Contig2_CmRNA	GO:0031224	GO:0017111	GO:0006811	GO:0009207	GO:0015405	GO:0032559
CL1488.Contig1_CmRNA	GO:0044238	GO:0003676	GO:0044260
CL1488.Contig2_CmRNA	GO:0005488
CL1494.Contig1_CmRNA	GO:0016787
CL1494.Contig2_CmRNA	GO:0005488	GO:0016787
CL1506.Contig1_CmRNA	GO:0032501	GO:0007610
CL1516.Contig1_CmRNA	GO:0030532	GO:0006412	GO:0017111	GO:0005681	GO:0000377	GO:0009207	GO:0008135	GO:0032561	GO:0044444
CL1519.Contig1_CmRNA	GO:0000278	GO:0000279	GO:0051301
CL1522.Contig1_CmRNA	GO:0046914	GO:0031090	GO:0043231	GO:0044444	GO:0016653	GO:0008152	GO:0000166
CL1522.Contig2_CmRNA	GO:0016653	GO:0046914	GO:0008152	GO:0044444	GO:0000166	GO:0043231
CL1525.Contig1_CmRNA	GO:0005488
CL1536.Contig1_CmRNA	GO:0006259	GO:0043234	GO:0005488	GO:0003678	GO:0043231
CL1536.Contig2_CmRNA	GO:0006259	GO:0043234	GO:0005488	GO:0043231
CL1555.Contig1_CmRNA	GO:0031224	GO:0018988	GO:0006066	GO:0016876	GO:0030301	GO:0006694	GO:0010467	GO:0004888	GO:0032559
CL1555.Contig2_CmRNA	GO:0031224	GO:0018988	GO:0006066	GO:0016876	GO:0030301	GO:0006694	GO:0010467	GO:0004888	GO:0032559
CL1569.Contig1_CmRNA	GO:0005488
CL1569.Contig2_CmRNA	GO:0003676
CL1572.Contig1_CmRNA	GO:0016079	GO:0006892	GO:0005624	GO:0048168	GO:0005515	GO:0006904	GO:0016020
CL1572.Contig2_CmRNA	GO:0016079	GO:0006892	GO:0005624	GO:0048168	GO:0005515	GO:0006904	GO:0016020
CL1572.Contig3_CmRNA	GO:0016079	GO:0006892	GO:0005624	GO:0048168	GO:0005515	GO:0006904	GO:0016020
CL1573.Contig1_CmRNA	GO:0046914	GO:0003676	GO:0006259
CL1583.Contig1_CmRNA	GO:0003824
CL1583.Contig2_CmRNA	GO:0016787
CL1595.Contig1_CmRNA	GO:0015630	GO:0000226	GO:0006342	GO:0044444
CL1598.Contig1_CmRNA	GO:0043169	GO:0007165
CL1598.Contig2_CmRNA	GO:0043169	GO:0007165
CL1601.Contig1_CmRNA	GO:0019538	GO:0004175
CL1604.Contig2_CmRNA	GO:0005875	GO:0006810	GO:0007049	GO:0044444	GO:0032559
CL1605.Contig1_CmRNA	GO:0003824
CL1615.Contig1_CmRNA	GO:0003676
CL1615.Contig2_CmRNA	GO:0003676
CL1627.Contig1_CmRNA	GO:0044464
CL1627.Contig2_CmRNA	GO:0044464
CL1627.Contig3_CmRNA	GO:0033057	GO:0031224	GO:0040009
CL1636.Contig1_CmRNA	GO:0016772
CL1636.Contig2_CmRNA	GO:0016772
CL1640.Contig1_CmRNA	GO:0044427	GO:0043565
CL1640.Contig2_CmRNA	GO:0044427	GO:0043565
CL1640.Contig3_CmRNA	GO:0044427	GO:0043565
CL1640.Contig4_CmRNA	GO:0044427	GO:0043565
CL1656.Contig1_CmRNA	GO:0005488
CL1657.Contig1_CmRNA	GO:0002376	GO:0032813	GO:0044464
CL1661.Contig1_CmRNA	GO:0048869	GO:0003723	GO:0044427	GO:0000380	GO:0016607	GO:0007444	GO:0005515	GO:0009653
CL1661.Contig2_CmRNA	GO:0048869	GO:0003723	GO:0044427	GO:0000380	GO:0016607	GO:0007444	GO:0005515	GO:0009653
CL1663.Contig1_CmRNA	GO:0007444	GO:0008194	GO:0006464
CL1665.Contig1_CmRNA	GO:0006546	GO:0043234
CL1665.Contig2_CmRNA	GO:0006546	GO:0043234
CL1667.Contig1_CmRNA	GO:0070011
CL1667.Contig2_CmRNA	GO:0070011
CL1667.Contig3_CmRNA	GO:0070011
CL1668.Contig1_CmRNA	GO:0044444	GO:0008252	GO:0043169
CL1668.Contig2_CmRNA	GO:0044444	GO:0008252	GO:0043169
CL1670.Contig2_CmRNA	GO:0008152	GO:0030414	GO:0070011
CL1672.Contig1_CmRNA	GO:0010876	GO:0046914	GO:0031461	GO:0032446	GO:0019787
CL1672.Contig2_CmRNA	GO:0010876	GO:0046914	GO:0031461	GO:0032446	GO:0019787
CL1675.Contig1_CmRNA	GO:0006950
CL1675.Contig2_CmRNA	GO:0006950
CL1676.Contig1_CmRNA	GO:0046872	GO:0006351	GO:0003677
CL1676.Contig2_CmRNA	GO:0046872	GO:0006351	GO:0003677
CL1680.Contig1_CmRNA	GO:0016020
CL1680.Contig2_CmRNA	GO:0016020
CL1682.Contig1_CmRNA	GO:0007276	GO:0048731	GO:0015631	GO:0009987	GO:0015630
CL1682.Contig2_CmRNA	GO:0007276	GO:0048731	GO:0015631	GO:0007165	GO:0015630
CL1685.Contig1_CmRNA	GO:0030414
CL1689.Contig1_CmRNA	GO:0023052
CL1689.Contig2_CmRNA	GO:0023052
CL1699.Contig1_CmRNA	GO:0005488	GO:0043231	GO:0009987	GO:0016020
CL1699.Contig2_CmRNA	GO:0005488	GO:0043231	GO:0009987	GO:0016020
CL1700.Contig1_CmRNA	GO:0016215	GO:0046914	GO:0043231	GO:0031224	GO:0006631
CL1701.Contig1_CmRNA	GO:0016491	GO:0008152	GO:0005506
CL1701.Contig2_CmRNA	GO:0016491	GO:0008152	GO:0005506
CL1701.Contig3_CmRNA	GO:0016491	GO:0008152	GO:0005506
CL1709.Contig1_CmRNA	GO:0043231	GO:0046914	GO:0030518	GO:0008289	GO:0001071	GO:0003677	GO:0009755	GO:0003707	GO:0006351
CL1709.Contig2_CmRNA	GO:0043231	GO:0046914	GO:0030518	GO:0008289	GO:0001071	GO:0003677	GO:0009755	GO:0003707	GO:0006351
CL1710.Contig1_CmRNA	GO:0003824
CL1710.Contig2_CmRNA	GO:0003676	GO:0034061	GO:0004518	GO:0006260
CL1712.Contig1_CmRNA	GO:0016763	GO:0006400
CL1712.Contig2_CmRNA	GO:0016740	GO:0008033
CL1713.Contig1_CmRNA	GO:0008452
CL1719.Contig1_CmRNA	GO:0065008	GO:0030674	GO:0007472	GO:0007613	GO:0004871	GO:0007264	GO:0045676	GO:0007169	GO:0030036	GO:0005102	GO:0000578	GO:0009792	GO:0008306	GO:0016020
CL1720.Contig1_CmRNA	GO:0008152
CL1720.Contig2_CmRNA	GO:0008152
CL1730.Contig1_CmRNA	GO:0070011
CL1730.Contig2_CmRNA	GO:0005576	GO:0070011
CL1730.Contig3_CmRNA	GO:0070011
CL1732.Contig1_CmRNA	GO:0006915	GO:0007219	GO:0008285	GO:0010796	GO:0001894	GO:0016192	GO:0035090	GO:0048869
CL1732.Contig2_CmRNA	GO:0006915	GO:0007219	GO:0008285	GO:0010796	GO:0001894	GO:0016192	GO:0035090	GO:0048869
CL1741.Contig1_CmRNA	GO:0016798	GO:0044238	GO:0043167
CL1741.Contig2_CmRNA	GO:0016798	GO:0044238	GO:0043167
CL1747.Contig1_CmRNA	GO:0007186
CL1747.Contig2_CmRNA	GO:0007186
CL1748.Contig1_CmRNA	GO:0009987	GO:0004857
CL1748.Contig2_CmRNA	GO:0034641	GO:0004857
CL1750.Contig1_CmRNA	GO:0043231
CL1757.Contig2_CmRNA	GO:0070161
CL1767.Contig1_CmRNA	GO:0007019	GO:0015631	GO:0015630
CL1767.Contig2_CmRNA	GO:0007019	GO:0015631	GO:0015630
CL1767.Contig3_CmRNA	GO:0007019	GO:0015631	GO:0015630
CL1767.Contig4_CmRNA	GO:0007019	GO:0015631	GO:0015630
CL1768.Contig1_CmRNA	GO:0016879	GO:0006464	GO:0032559
CL1768.Contig2_CmRNA	GO:0016879	GO:0006464	GO:0032559
CL1768.Contig3_CmRNA	GO:0016879	GO:0006464	GO:0032559
CL1769.Contig1_CmRNA	GO:0016836	GO:0046914
CL1769.Contig2_CmRNA	GO:0016836	GO:0046914
CL1770.Contig1_CmRNA	GO:0023052	GO:0004468	GO:0060089
CL1770.Contig2_CmRNA	GO:0023052	GO:0004468	GO:0060089
CL1772.Contig1_CmRNA	GO:0003676
CL1772.Contig2_CmRNA	GO:0003676
CL1775.Contig1_CmRNA	GO:0008152	GO:0044444	GO:0016829	GO:0005496
CL1782.Contig1_CmRNA	GO:0005198
CL1782.Contig2_CmRNA	GO:0005198
CL1785.Contig1_CmRNA	GO:0005488	GO:0043231	GO:0044238	GO:0044427	GO:0006325	GO:0016787
CL1787.Contig1_CmRNA	GO:0006464	GO:0007126	GO:0048232	GO:0019787	GO:0032559	GO:0007619
CL1787.Contig2_CmRNA	GO:0019941	GO:0000209	GO:0044444	GO:0019787	GO:0032559
CL1804.Contig1_CmRNA	GO:0003723	GO:0010467	GO:0030529	GO:0005198
CL1804.Contig2_CmRNA	GO:0003723	GO:0010467	GO:0030529	GO:0005198
CL1805.Contig1_CmRNA	GO:0003676	GO:0046914
CL1805.Contig2_CmRNA	GO:0003676	GO:0046914
CL1825.Contig1_CmRNA	GO:0006277	GO:0006261	GO:0051297	GO:0043231	GO:0006959	GO:0051304	GO:0007165	GO:0000808
CL1825.Contig2_CmRNA	GO:0006261	GO:0051297	GO:0043231	GO:0006959	GO:0051304	GO:0007165	GO:0000808
CL1828.Contig2_CmRNA	GO:0003712	GO:0043234	GO:0006909	GO:0060089	GO:0006355	GO:0042802	GO:0023052	GO:0031647	GO:0051427	GO:0031572
CL1830.Contig1_CmRNA	GO:0006464	GO:0004672	GO:0032559
CL1830.Contig2_CmRNA	GO:0006464	GO:0004674	GO:0032559
CL1833.Contig1_CmRNA	GO:0005488
CL1852.Contig1_CmRNA	GO:0043231
CL1852.Contig2_CmRNA	GO:0043231
CL1861.Contig1_CmRNA	GO:0034062	GO:0006351	GO:0031572
CL1861.Contig2_CmRNA	GO:0034062	GO:0006351	GO:0031572
CL1864.Contig1_CmRNA	GO:0003824	GO:0008152
CL1873.Contig1_CmRNA	GO:0016055	GO:0032991	GO:0043231	GO:0003712	GO:0006357	GO:0003676	GO:0008589	GO:0030036	GO:0048812	GO:0003006
CL1873.Contig2_CmRNA	GO:0032991	GO:0005488	GO:0043231	GO:0003712	GO:0006357	GO:0008589	GO:0030036	GO:0048812	GO:0003006
CL1875.Contig1_CmRNA	GO:0009987	GO:0005488	GO:0003824
CL1875.Contig2_CmRNA	GO:0008092
CL1878.Contig1_CmRNA	GO:0005488	GO:0016198	GO:0031224	GO:0023052	GO:0004888
CL1881.Contig1_CmRNA	GO:0008092	GO:0031032	GO:0043231	GO:0010927	GO:0048285	GO:0005865	GO:0048513	GO:0014706
CL1881.Contig2_CmRNA	GO:0008092	GO:0031032	GO:0043231	GO:0010927	GO:0048285	GO:0005865	GO:0048513	GO:0014706
CL1884.Contig1_CmRNA	GO:0006091	GO:0006635	GO:0016406	GO:0044439
CL1884.Contig2_CmRNA	GO:0006091	GO:0006635	GO:0016406	GO:0044439
CL1888.Contig1_CmRNA	GO:0050658	GO:0016607	GO:0044427	GO:0005681	GO:0019094	GO:0000380	GO:0016477	GO:0007293	GO:0003729
CL1888.Contig2_CmRNA	GO:0050658	GO:0016607	GO:0044427	GO:0005681	GO:0019094	GO:0000380	GO:0016477	GO:0007293	GO:0003729
CL1892.Contig1_CmRNA	GO:0031981	GO:0030528	GO:0005515	GO:0048812	GO:0006412	GO:0006355	GO:0000153	GO:0006354	GO:0008135	GO:0019787	GO:0032446	GO:0051704	GO:0019941	GO:0045935
CL1892.Contig2_CmRNA	GO:0031981	GO:0030528	GO:0005515	GO:0048812	GO:0006412	GO:0006355	GO:0000153	GO:0006354	GO:0008135	GO:0019787	GO:0032446	GO:0051704	GO:0019941	GO:0045935
CL1898.Contig1_CmRNA	GO:0016740
CL1898.Contig2_CmRNA	GO:0016740
CL1901.Contig1_CmRNA	GO:0005875	GO:0016887	GO:0048812	GO:0007017	GO:0007420
CL1906.Contig1_CmRNA	GO:0005737	GO:0032501	GO:0043231	GO:0009987	GO:0007338
CL1908.Contig1_CmRNA	GO:0048731	GO:0043231	GO:0006935	GO:0015645	GO:0044444	GO:0010884
CL1908.Contig2_CmRNA	GO:0048731	GO:0043231	GO:0006935	GO:0015645	GO:0044444	GO:0010884
CL1910.Contig1_CmRNA	GO:0005488	GO:0032991
CL1910.Contig2_CmRNA	GO:0031981	GO:0032991	GO:0017148	GO:0043484	GO:0007297	GO:0044087	GO:0019094	GO:0006935	GO:0043566	GO:0003729
CL1911.Contig1_CmRNA	GO:0005488	GO:0022892	GO:0006631
CL1911.Contig2_CmRNA	GO:0005488	GO:0022892	GO:0006631
CL1912.Contig1_CmRNA	GO:0003676	GO:0034061	GO:0004518	GO:0006260
CL1913.Contig1_CmRNA	GO:0009987	GO:0005488	GO:0043231	GO:0003712
CL1913.Contig2_CmRNA	GO:0009987	GO:0005488	GO:0043231	GO:0003712
CL1917.Contig1_CmRNA	GO:0004672
CL1918.Contig1_CmRNA	GO:0003002	GO:0034968	GO:0043231	GO:0007472	GO:0016741	GO:0046914	GO:0005694
CL1921.Contig1_CmRNA	GO:0016740
CL1921.Contig2_CmRNA	GO:0016740
CL1922.Contig1_CmRNA	GO:0005488
CL1923.Contig1_CmRNA	GO:0005740	GO:0016020
CL1932.Contig1_CmRNA	GO:0005249	GO:0034220	GO:0031224	GO:0006873	GO:0030001
CL1932.Contig2_CmRNA	GO:0005249	GO:0034220	GO:0031224	GO:0006873	GO:0030001
CL1933.Contig1_CmRNA	GO:0008038	GO:0048675	GO:0043005	GO:0044297	GO:0007420	GO:0006935	GO:0042802	GO:0006897	GO:0043498	GO:0004888
CL1933.Contig2_CmRNA	GO:0008038	GO:0048675	GO:0043005	GO:0044297	GO:0007420	GO:0006935	GO:0042802	GO:0006897	GO:0043498	GO:0004888
CL1938.Contig1_CmRNA	GO:0044464	GO:0009987
CL1938.Contig2_CmRNA	GO:0005622	GO:0009987
CL1939.Contig1_CmRNA	GO:0007052	GO:0010467	GO:0015935	GO:0003824	GO:0005198
CL1939.Contig2_CmRNA	GO:0007052	GO:0010467	GO:0015935	GO:0005198
CL1944.Contig1_CmRNA	GO:0005262	GO:0034704	GO:0070838	GO:0032412
CL1944.Contig2_CmRNA	GO:0005262	GO:0034704	GO:0070838	GO:0032412
CL1947.Contig1_CmRNA	GO:0009062	GO:0043231	GO:0044444	GO:0016453	GO:0015630
CL1947.Contig2_CmRNA	GO:0009062	GO:0043231	GO:0044444	GO:0016453	GO:0015630
CL1948.Contig1_CmRNA	GO:0005488
CL1951.Contig2_CmRNA	GO:0043231	GO:0010038	GO:0043648	GO:0070547	GO:0006570	GO:0009064	GO:0008652	GO:0031406	GO:0031960	GO:0009063	GO:0016846	GO:0048037	GO:0006950
CL1956.Contig1_CmRNA	GO:0016879	GO:0006464	GO:0003006
CL1956.Contig2_CmRNA	GO:0007041	GO:0005488	GO:0043234	GO:0043393	GO:0005774	GO:0007033	GO:0016197	GO:0019787	GO:0006464
CL1966.Contig1_CmRNA	GO:0009987	GO:0005901
CL1968.Contig1_CmRNA	GO:0046914
CL1968.Contig2_CmRNA	GO:0046914
CL1971.Contig1_CmRNA	GO:0046872	GO:0009207	GO:0016791	GO:0032561	GO:0017111
CL1982.Contig1_CmRNA	GO:0007292	GO:0009791
CL1985.Contig1_CmRNA	GO:0031224
CL2002.Contig1_CmRNA	GO:0003676	GO:0043170	GO:0044238
CL2002.Contig2_CmRNA	GO:0005488
CL2009.Contig1_CmRNA	GO:0001745	GO:0003676	GO:0061061	GO:0007399	GO:0043231	GO:0044444	GO:0012501	GO:0060180
CL2017.Contig1_CmRNA	GO:0031224	GO:0006631	GO:0043231	GO:0033057	GO:0042446	GO:0046914	GO:0016215	GO:0044444
CL2018.Contig1_CmRNA	GO:0006952	GO:0023052	GO:0004872	GO:0044425
CL2018.Contig2_CmRNA	GO:0006952	GO:0023052	GO:0004872	GO:0044425
CL2022.Contig1_CmRNA	GO:0055085	GO:0005249	GO:0050804	GO:0007626	GO:0042391	GO:0030001	GO:0005887
CL2022.Contig2_CmRNA	GO:0005249	GO:0050804	GO:0007626	GO:0042391	GO:0030001	GO:0005887
CL2024.Contig1_CmRNA	GO:0016787
CL2024.Contig2_CmRNA	GO:0016787
CL2025.Contig1_CmRNA	GO:0005622
CL2025.Contig2_CmRNA	GO:0007275	GO:0031981
CL2049.Contig1_CmRNA	GO:0019538	GO:0004175
CL2054.Contig1_CmRNA	GO:0043234	GO:0031124	GO:0003723	GO:0016604	GO:0032446	GO:0019787
CL2058.Contig1_CmRNA	GO:0006260	GO:0046914	GO:0003676	GO:0044464	GO:0034061
CL2062.Contig1_CmRNA	GO:0015927	GO:0005984
CL2062.Contig2_CmRNA	GO:0015927	GO:0005984
CL2063.Contig1_CmRNA	GO:0046914	GO:0044464
CL2063.Contig2_CmRNA	GO:0046914	GO:0044464
CL2067.Contig1_CmRNA	GO:0005488	GO:0043231	GO:0016882	GO:0004872	GO:0044444	GO:0006760	GO:0016020
CL2078.Contig1_CmRNA	GO:0005343	GO:0044464	GO:0030001
CL2079.Contig1_CmRNA	GO:0031224	GO:0018988	GO:0006066	GO:0016876	GO:0030301	GO:0006694	GO:0010467	GO:0004888	GO:0032559
CL2093.Contig1_CmRNA	GO:0032879	GO:0019829	GO:0005789	GO:0031224	GO:0032559	GO:0043169	GO:0070838	GO:0007268	GO:0009206
CL2093.Contig2_CmRNA	GO:0031224	GO:0043169	GO:0009206	GO:0019829	GO:0070838	GO:0005789	GO:0032559
CL2093.Contig3_CmRNA	GO:0032879	GO:0019829	GO:0005789	GO:0031224	GO:0032559	GO:0043169	GO:0070838	GO:0007268	GO:0009206
CL2094.Contig1_CmRNA	GO:0008135	GO:0006351	GO:0030528	GO:0043231	GO:0006412
CL2094.Contig2_CmRNA	GO:0008135	GO:0006351	GO:0030528	GO:0043231	GO:0006412
CL2095.Contig3_CmRNA	GO:0015988	GO:0016469	GO:0019829
CL2097.Contig1_CmRNA	GO:0004067	GO:0006530	GO:0044424
CL2097.Contig2_CmRNA	GO:0004067	GO:0006530	GO:0044424
CL2098.Contig1_CmRNA	GO:0043231	GO:0007472	GO:0003676	GO:0044427	GO:0042623	GO:0007292	GO:0005700	GO:0043486	GO:0032559
CL2105.Contig1_CmRNA	GO:0003676	GO:0043170	GO:0044238
CL2105.Contig2_CmRNA	GO:0006260	GO:0004175	GO:0019538	GO:0003676	GO:0034061
CL2106.Contig1_CmRNA	GO:0000339	GO:0044424
CL2106.Contig2_CmRNA	GO:0000339	GO:0044424
CL2114.Contig1_CmRNA	GO:0040003	GO:0009880	GO:0001751	GO:0007243	GO:0007626	GO:0043231	GO:0003006	GO:0033189	GO:0015630	GO:0004672	GO:0051276	GO:0048102	GO:0006468	GO:0032559	GO:0007292	GO:0000380	GO:0043954
CL2114.Contig2_CmRNA	GO:0009880	GO:0001751	GO:0007243	GO:0007626	GO:0043231	GO:0003006	GO:0033189	GO:0015630	GO:0004672	GO:0051276	GO:0048102	GO:0006468	GO:0032559	GO:0007292	GO:0000380
CL2114.Contig3_CmRNA	GO:0040003	GO:0009880	GO:0001751	GO:0007243	GO:0009605	GO:0007626	GO:0043231	GO:0003006	GO:0015630	GO:0004672	GO:0051276	GO:0048102	GO:0006468	GO:0032559	GO:0007292	GO:0000380	GO:0043954
CL2114.Contig4_CmRNA	GO:0040003	GO:0009880	GO:0001751	GO:0007243	GO:0009605	GO:0007626	GO:0043231	GO:0003006	GO:0015630	GO:0004672	GO:0051276	GO:0048102	GO:0006468	GO:0032559	GO:0007292	GO:0000380	GO:0043954
CL2114.Contig5_CmRNA	GO:0040003	GO:0009880	GO:0001751	GO:0007243	GO:0009605	GO:0007626	GO:0043231	GO:0003006	GO:0015630	GO:0004672	GO:0051276	GO:0048102	GO:0006468	GO:0032559	GO:0007292	GO:0000380	GO:0043954
CL2118.Contig1_CmRNA	GO:0030414	GO:0005515	GO:0008152	GO:0007178
CL2130.Contig1_CmRNA	GO:0003676	GO:0043170	GO:0044238
CL2133.Contig1_CmRNA	GO:0044464
CL2137.Contig1_CmRNA	GO:0016740
CL2141.Contig1_CmRNA	GO:0043231	GO:0021533	GO:0008235	GO:0008092	GO:0006996	GO:0035608	GO:0021695	GO:0046530	GO:0001505	GO:0018410	GO:0021988	GO:0044444
CL2141.Contig2_CmRNA	GO:0008238	GO:0048513	GO:0046872	GO:0008237	GO:0007399	GO:0009987	GO:0044444	GO:0019538
CL2142.Contig1_CmRNA	GO:0035556	GO:0006915	GO:0005622
CL2142.Contig2_CmRNA	GO:0035556	GO:0006915	GO:0005622
CL2150.Contig1_CmRNA	GO:0008152	GO:0003824	GO:0046914
CL2150.Contig2_CmRNA	GO:0008152	GO:0003824	GO:0046914
CL2154.Contig1_CmRNA	GO:0006631	GO:0015645
CL2155.Contig1_CmRNA	GO:0003723	GO:0044424
CL2155.Contig2_CmRNA	GO:0003723	GO:0044424
CL2158.Contig1_CmRNA	GO:0005626	GO:0015893	GO:0006629	GO:0016021	GO:0042626	GO:0009207	GO:0005911	GO:0010876	GO:0012505	GO:0032559	GO:0071842
CL2162.Contig1_CmRNA	GO:0016215	GO:0046914	GO:0043231	GO:0031224	GO:0006631
CL2162.Contig2_CmRNA	GO:0016215	GO:0046914	GO:0043231	GO:0031224	GO:0006631
CL2163.Contig1_CmRNA	GO:0016879	GO:0006464	GO:0032559
CL2163.Contig2_CmRNA	GO:0070739	GO:0032446	GO:0019787	GO:0032559
CL2164.Contig1_CmRNA	GO:0016747	GO:0009060	GO:0005975	GO:0046912	GO:0044429	GO:0015630
CL2164.Contig2_CmRNA	GO:0016747	GO:0009060	GO:0005975	GO:0046912	GO:0044429
CL2168.Contig1_CmRNA	GO:0051234	GO:0044464
CL2168.Contig2_CmRNA	GO:0051234	GO:0044464
CL2170.Contig1_CmRNA	GO:0009987
CL2172.Contig1_CmRNA	GO:0005515	GO:0003006	GO:0042065
CL2174.Contig1_CmRNA	GO:0000377	GO:0003676	GO:0043231
CL2174.Contig2_CmRNA	GO:0000377	GO:0003676	GO:0043231
CL2176.Contig1_CmRNA	GO:0016772	GO:0000075	GO:0005488	GO:0003712	GO:0070461	GO:0005667	GO:0006351	GO:0016573	GO:0043189
CL2181.Contig1_CmRNA	GO:0030414
CL2188.Contig2_CmRNA	GO:0030097
CL2191.Contig1_CmRNA	GO:0007017	GO:0003774	GO:0032559	GO:0015630	GO:0015031
CL2191.Contig2_CmRNA	GO:0003774	GO:0009987	GO:0000166	GO:0015031
CL2193.Contig1_CmRNA	GO:0006909	GO:0006796	GO:0023052	GO:0016740	GO:0006351	GO:0004721	GO:0006464
CL2193.Contig2_CmRNA	GO:0006909	GO:0006796	GO:0023052	GO:0016740	GO:0006351	GO:0004721	GO:0006464
CL2197.Contig1_CmRNA	GO:0006412	GO:0019080	GO:0043231	GO:0003676	GO:0015935	GO:0046914	GO:0031016	GO:0007067	GO:0005198
CL2200.Contig1_CmRNA	GO:0051649	GO:0044424	GO:0023052	GO:0016192	GO:0065007	GO:0032501
CL2209.Contig1_CmRNA	GO:0006351	GO:0003677	GO:0001071	GO:0043231
CL2209.Contig2_CmRNA	GO:0043231	GO:0007472	GO:0006357	GO:0000981	GO:0048592	GO:0003677	GO:0001708	GO:0048859	GO:0003702
CL2214.Contig1_CmRNA	GO:0031406	GO:0046914	GO:0006558	GO:0016714
CL2214.Contig2_CmRNA	GO:0031406	GO:0046914	GO:0006558	GO:0016714
CL2217.Contig1_CmRNA	GO:0006720	GO:0004659
CL2225.Contig1_CmRNA	GO:0005488
CL2228.Contig1_CmRNA	GO:0033036	GO:0032991	GO:0048729	GO:0043231	GO:0070161	GO:0007315	GO:0015629	GO:0015630	GO:0016056	GO:0009855	GO:0007635	GO:0008092	GO:0030036	GO:0035088	GO:0044091	GO:0042051	GO:0044444
CL2230.Contig1_CmRNA	GO:0022904	GO:0050136
CL2231.Contig1_CmRNA	GO:0016407
CL2231.Contig2_CmRNA	GO:0016407
CL2241.Contig1_CmRNA	GO:0004725	GO:0044459	GO:0006464	GO:0000267	GO:0005515	GO:0043231
CL2241.Contig2_CmRNA	GO:0004725	GO:0044459	GO:0006464	GO:0000267	GO:0005515	GO:0043231
CL2241.Contig3_CmRNA	GO:0004725	GO:0044424	GO:0006464
CL2241.Contig4_CmRNA	GO:0004725	GO:0044424	GO:0006464
CL2244.Contig1_CmRNA	GO:0005875	GO:0003774
CL2244.Contig2_CmRNA	GO:0005875	GO:0003774
CL2244.Contig3_CmRNA	GO:0005875	GO:0003774
CL2244.Contig4_CmRNA	GO:0005875	GO:0003774
CL2253.Contig1_CmRNA	GO:0030681	GO:0005488	GO:0043231
CL2254.Contig1_CmRNA	GO:0046914	GO:0030246	GO:0009987
CL2254.Contig2_CmRNA	GO:0030246
CL2257.Contig1_CmRNA	GO:0005488
CL2261.Contig1_CmRNA	GO:0046872	GO:0006563	GO:0016791	GO:0006796	GO:0044424
CL2263.Contig1_CmRNA	GO:0005488	GO:0004672	GO:0044237
CL2263.Contig2_CmRNA	GO:0005488	GO:0044238	GO:0044260
CL2264.Contig1_CmRNA	GO:0000377	GO:0043231
CL2264.Contig2_CmRNA	GO:0000377	GO:0043231
CL2268.Contig1_CmRNA	GO:0042995	GO:0005488
CL2278.Contig1_CmRNA	GO:0004518
CL2278.Contig2_CmRNA	GO:0004518
CL2284.Contig1_CmRNA	GO:0003676	GO:0034061	GO:0004518	GO:0006260
CL2297.Contig1_CmRNA	GO:0009060	GO:0046872	GO:0044262	GO:0043231	GO:0044444	GO:0004448	GO:0019752	GO:0000166
CL2297.Contig2_CmRNA	GO:0009060	GO:0046872	GO:0044262	GO:0043231	GO:0044444	GO:0004448	GO:0019752	GO:0000166
CL2299.Contig1_CmRNA	GO:0031224	GO:0017111	GO:0009207	GO:0015405	GO:0015604	GO:0032559
CL2299.Contig2_CmRNA	GO:0031224	GO:0017111	GO:0009207	GO:0015405	GO:0015604	GO:0032559
CL2310.Contig2_CmRNA	GO:0016791
CL2324.Contig1_CmRNA	GO:0003676	GO:0034061	GO:0004518	GO:0006260
CL2324.Contig3_CmRNA	GO:0003676	GO:0034061	GO:0004518	GO:0006260
CL2325.Contig1_CmRNA	GO:0007052	GO:0010467	GO:0015934	GO:0005198
CL2325.Contig2_CmRNA	GO:0010467	GO:0030529	GO:0005198
CL2326.Contig1_CmRNA	GO:0009893	GO:0015669	GO:0043168	GO:0022892	GO:0016716	GO:0046914	GO:0006570	GO:0006582	GO:0006950
CL2326.Contig2_CmRNA	GO:0009893	GO:0015669	GO:0043168	GO:0022892	GO:0016716	GO:0046914	GO:0006570	GO:0006582	GO:0006950
CL2327.Contig2_CmRNA	GO:0032561	GO:0004003	GO:0000726	GO:0032559	GO:0007346
CL2333.Contig1_CmRNA	GO:0006825
CL2333.Contig2_CmRNA	GO:0022890	GO:0031224	GO:0006825
CL2335.Contig1_CmRNA	GO:0032559	GO:0050896
CL2335.Contig2_CmRNA	GO:0032559	GO:0050896
CL2338.Contig1_CmRNA	GO:0006810	GO:0031224
CL2338.Contig2_CmRNA	GO:0006810	GO:0031224
CL2341.Contig1_CmRNA	GO:0030528	GO:0070461	GO:0006357	GO:0006405	GO:0016570	GO:0031490	GO:0003713	GO:0005635
CL2341.Contig2_CmRNA	GO:0070461	GO:0050658	GO:0006355	GO:0016570	GO:0003713
CL2352.Contig1_CmRNA	GO:0005980	GO:0006796	GO:0008287	GO:0048513	GO:0035097	GO:0043169	GO:0005978	GO:0006464	GO:0006641	GO:0044444	GO:0004722
CL2352.Contig2_CmRNA	GO:0016791
CL2352.Contig3_CmRNA	GO:0016791
CL2352.Contig4_CmRNA	GO:0016791
CL2353.Contig1_CmRNA	GO:0006810	GO:0048859	GO:0007297	GO:0017022	GO:0032155	GO:0035151	GO:0046872	GO:0030036	GO:0016887	GO:0001738	GO:0007476	GO:0035190	GO:0016459
CL2354.Contig1_CmRNA	GO:0003002	GO:0016055	GO:0043231	GO:0007472	GO:0019900	GO:0006909	GO:0060089	GO:0007292	GO:0019827
CL2354.Contig2_CmRNA	GO:0003002	GO:0016055	GO:0043231	GO:0007472	GO:0019900	GO:0006909	GO:0060089	GO:0007292	GO:0019827
CL2356.Contig1_CmRNA	GO:0019538	GO:0046914	GO:0006691	GO:0070011
CL2361.Contig1_CmRNA	GO:0046872
CL2366.Contig1_CmRNA	GO:0046872	GO:0044444	GO:0016020
CL2366.Contig2_CmRNA	GO:0046872	GO:0044444	GO:0016020
CL2369.Contig1_CmRNA	GO:0030532	GO:0005488	GO:0031981	GO:0000087	GO:0000398
CL2373.Contig1_CmRNA	GO:0008152	GO:0003824
CL2373.Contig2_CmRNA	GO:0009987
CL2376.Contig1_CmRNA	GO:0005488
CL2378.Contig1_CmRNA	GO:0003676	GO:0009987	GO:0008152	GO:0044424
CL2378.Contig2_CmRNA	GO:0009987	GO:0003723	GO:0044446	GO:0005634
CL2382.Contig1_CmRNA	GO:0005488	GO:0044464
CL2382.Contig2_CmRNA	GO:0005488	GO:0044464
CL2383.Contig1_CmRNA	GO:0016876	GO:0006412	GO:0043039
CL2383.Contig2_CmRNA	GO:0016876	GO:0006412	GO:0043039
CL2388.Contig1_CmRNA	GO:0008233
CL2388.Contig2_CmRNA	GO:0008233
CL2393.Contig1_CmRNA	GO:0003676	GO:0034061	GO:0004518	GO:0006260
CL2393.Contig2_CmRNA	GO:0003676	GO:0034061	GO:0006260
CL2394.Contig1_CmRNA	GO:0005975	GO:0003824
CL2394.Contig2_CmRNA	GO:0005975	GO:0003824
CL2396.Contig2_CmRNA	GO:0007411	GO:0065008	GO:0008092	GO:0006996	GO:0007268	GO:0050794	GO:0051128	GO:0005886	GO:0044444
CL2404.Contig1_CmRNA	GO:0017111	GO:0005764	GO:0035556	GO:0015630	GO:0000087	GO:0009207	GO:0005770	GO:0032561	GO:0015631	GO:0044430
CL2404.Contig2_CmRNA	GO:0017111	GO:0005764	GO:0035556	GO:0015630	GO:0000087	GO:0009207	GO:0005770	GO:0032561	GO:0015631	GO:0044430
CL2404.Contig3_CmRNA	GO:0017111	GO:0005764	GO:0035556	GO:0015630	GO:0000087	GO:0009207	GO:0005770	GO:0032561	GO:0015631	GO:0044430
CL2405.Contig1_CmRNA	GO:0016787	GO:0044464
CL2409.Contig1_CmRNA	GO:0005622
CL2409.Contig2_CmRNA	GO:0005622
CL2413.Contig1_CmRNA	GO:0010467	GO:0030529	GO:0005198
CL2413.Contig2_CmRNA	GO:0010467	GO:0030529	GO:0005198
CL3160.Contig1_CmRNA	GO:0060089	GO:0031234	GO:0007166	GO:0043229	GO:0000166
CL3170.Contig1_CmRNA	GO:0043169	GO:0043231	GO:0019318	GO:0042051	GO:0015928	GO:0032989	GO:0042995	GO:0007610	GO:0016020
CL3170.Contig2_CmRNA	GO:0043169	GO:0043231	GO:0032989	GO:0016020	GO:0007610	GO:0042051	GO:0042995
CL3174.Contig1_CmRNA	GO:0005198
CL3178.Contig1_CmRNA	GO:0008152	GO:0005496	GO:0003824
CL3178.Contig2_CmRNA	GO:0008152	GO:0005496	GO:0003824
CL3185.Contig1_CmRNA	GO:0046914	GO:0016671	GO:0018193
CL3185.Contig2_CmRNA	GO:0046914	GO:0016671	GO:0018193
CL3189.Contig1_CmRNA	GO:0004091
CL3192.Contig1_CmRNA	GO:0016887	GO:0005215
CL3193.Contig1_CmRNA	GO:0043231	GO:0005488
CL3193.Contig2_CmRNA	GO:0005488	GO:0000175	GO:0043231
CL3196.Contig1_CmRNA	GO:0008152	GO:0005488	GO:0003824
CL3198.Contig1_CmRNA	GO:0005488	GO:0048856	GO:0007275
CL3215.Contig1_CmRNA	GO:0044464	GO:0032561
CL3215.Contig2_CmRNA	GO:0044464	GO:0032561
CL3219.Contig1_CmRNA	GO:0046872	GO:0008092
CL3219.Contig2_CmRNA	GO:0046872	GO:0008092
CL3222.Contig1_CmRNA	GO:0032559	GO:0043232
CL3237.Contig1_CmRNA	GO:0010467	GO:0030529	GO:0005198
CL3238.Contig1_CmRNA	GO:0009987	GO:0051179	GO:0005488	GO:0050789	GO:0043170	GO:0016740	GO:0040011	GO:0007275
CL3244.Contig1_CmRNA	GO:0043231	GO:0044444
CL3255.Contig1_CmRNA	GO:0007417	GO:0007043	GO:0004872	GO:0023052	GO:0030036	GO:0021782	GO:0065007	GO:0016020	GO:0030534
CL3255.Contig2_CmRNA	GO:0007417	GO:0007043	GO:0004872	GO:0023052	GO:0030036	GO:0021782	GO:0065007	GO:0016020	GO:0030534
CL3271.Contig1_CmRNA	GO:0009060	GO:0051536	GO:0043231	GO:0044444	GO:0016836
CL3289.Contig1_CmRNA	GO:0046872	GO:0006163	GO:0016879	GO:0032561	GO:0044424
CL3292.Contig2_CmRNA	GO:0006412	GO:0003729	GO:0006351	GO:0044424	GO:0007549
CL3293.Contig1_CmRNA	GO:0006796	GO:0004871	GO:0016772
CL3297.Contig1_CmRNA	GO:0044444	GO:0016788
CL3298.Contig1_CmRNA	GO:0042302
CL3298.Contig2_CmRNA	GO:0042302
CL3300.Contig2_CmRNA	GO:0006629	GO:0009888	GO:0043231	GO:0055114	GO:0046914	GO:0008289	GO:0001071	GO:0003677	GO:0004879	GO:0009755	GO:0006351
CL3307.Contig1_CmRNA	GO:0016020
CL3308.Contig1_CmRNA	GO:0019842	GO:0006007	GO:0015630	GO:0016624	GO:0009060	GO:0005759
CL3308.Contig2_CmRNA	GO:0019842	GO:0006007	GO:0015630	GO:0016624	GO:0009060	GO:0005759
CL3317.Contig1_CmRNA	GO:0046914	GO:0051540	GO:0031163	GO:0043231
CL3318.Contig1_CmRNA	GO:0004690	GO:0006464	GO:0032559
CL3319.Contig2_CmRNA	GO:0010467	GO:0003676	GO:0034062
CL3329.Contig1_CmRNA	GO:0010498	GO:0005681	GO:0061135	GO:0031981	GO:0000377	GO:0022624	GO:0005700
CL3329.Contig2_CmRNA	GO:0010498	GO:0005681	GO:0061135	GO:0031981	GO:0000377	GO:0022624	GO:0005700
CL3330.Contig1_CmRNA	GO:0008152	GO:0003824
CL3330.Contig2_CmRNA	GO:0019321	GO:0016616	GO:0046496	GO:0042995	GO:0019318	GO:0044424
CL3331.Contig1_CmRNA	GO:0005488
CL3337.Contig1_CmRNA	GO:0003824
CL3338.Contig1_CmRNA	GO:0016859	GO:0044267
CL3338.Contig2_CmRNA	GO:0016859	GO:0044267
CL3348.Contig1_CmRNA	GO:0051766	GO:0006796	GO:0000828
CL3348.Contig2_CmRNA	GO:0051766	GO:0006796
CL3349.Contig1_CmRNA	GO:0046872
CL3349.Contig2_CmRNA	GO:0046872
CL3352.Contig1_CmRNA	GO:0006351	GO:0006909	GO:0007450	GO:0043231	GO:0003006	GO:0001752	GO:0042685	GO:0001071	GO:0055002	GO:0007169	GO:0007264	GO:0003677	GO:0060446	GO:0007445	GO:0042051	GO:0002682	GO:0007472	GO:0043066
CL3352.Contig2_CmRNA	GO:0006351	GO:0006909	GO:0007450	GO:0043231	GO:0003006	GO:0001752	GO:0042685	GO:0055002	GO:0007169	GO:0007264	GO:0003677	GO:0060446	GO:0007445	GO:0042051	GO:0002682	GO:0007472	GO:0043066
CL3354.Contig1_CmRNA	GO:0005488
CL3355.Contig1_CmRNA	GO:0032559	GO:0042623
CL3362.Contig1_CmRNA	GO:0009888	GO:0030030	GO:0009887	GO:0065007	GO:0048666
CL3371.Contig1_CmRNA	GO:0003723	GO:0035196	GO:0042078	GO:0007399	GO:0019827	GO:0034660	GO:0044424	GO:0016246
CL3371.Contig2_CmRNA	GO:0003723	GO:0035196	GO:0042078	GO:0007399	GO:0019827	GO:0034660	GO:0044424	GO:0016246
CL3388.Contig1_CmRNA	GO:0008152	GO:0016491
CL3388.Contig2_CmRNA	GO:0008152	GO:0016491
CL3390.Contig1_CmRNA	GO:0006412	GO:0006355	GO:0005667	GO:0006352	GO:0008135	GO:0003702
CL3390.Contig2_CmRNA	GO:0006412	GO:0006355	GO:0005667	GO:0006352	GO:0008135	GO:0003702
CL3412.Contig1_CmRNA	GO:0005488	GO:0016020	GO:0005198
CL3419.Contig1_CmRNA	GO:0007186
CL3419.Contig2_CmRNA	GO:0007186
CL3423.Contig1_CmRNA	GO:0008233
CL3423.Contig2_CmRNA	GO:0003824
CL3428.Contig1_CmRNA	GO:0003824
CL3428.Contig2_CmRNA	GO:0003824
CL3429.Contig1_CmRNA	GO:0016021
CL3429.Contig2_CmRNA	GO:0030176	GO:0009987
CL3433.Contig1_CmRNA	GO:0015927	GO:0005984	GO:0005886
CL3437.Contig1_CmRNA	GO:0032561	GO:0017111	GO:0016023	GO:0051049	GO:0044431	GO:0000149	GO:0048168	GO:0006886	GO:0032155	GO:0009207	GO:0010008	GO:0035556
CL3437.Contig2_CmRNA	GO:0032561	GO:0017111	GO:0016023	GO:0051049	GO:0044431	GO:0000149	GO:0048168	GO:0006886	GO:0032155	GO:0009207	GO:0010008	GO:0035556
CL3440.Contig1_CmRNA	GO:0019538	GO:0044444	GO:0005488	GO:0004175	GO:0043231
CL3440.Contig2_CmRNA	GO:0019538	GO:0044444	GO:0005488	GO:0004175	GO:0043231
CL3441.Contig1_CmRNA	GO:0003824
CL3450.Contig1_CmRNA	GO:0015988	GO:0015077	GO:0016469	GO:0005515	GO:0015662
CL3450.Contig2_CmRNA	GO:0015988	GO:0015077	GO:0016469	GO:0005515	GO:0015662
CL3461.Contig1_CmRNA	GO:0006810	GO:0031224
CL3472.Contig1_CmRNA	GO:0031224	GO:0004888
CL3475.Contig1_CmRNA	GO:0003824
CL3475.Contig2_CmRNA	GO:0003824
CL3480.Contig1_CmRNA	GO:0019538	GO:0004175
CL3480.Contig2_CmRNA	GO:0019538	GO:0004175
CL3490.Contig1_CmRNA	GO:0009314	GO:0043231	GO:0043234	GO:0006282	GO:0046872	GO:0016574	GO:0005515	GO:0019787
CL3490.Contig2_CmRNA	GO:0009314	GO:0043231	GO:0043234	GO:0006282	GO:0046872	GO:0016574	GO:0005515	GO:0019787
CL3494.Contig1_CmRNA	GO:0005488
CL3504.Contig1_CmRNA	GO:0006560	GO:0016646
CL3504.Contig2_CmRNA	GO:0006560	GO:0016646
CL3511.Contig1_CmRNA	GO:0046872	GO:0004721
CL3511.Contig2_CmRNA	GO:0046872	GO:0004721
CL3514.Contig1_CmRNA	GO:0006281	GO:0003676	GO:0043231
CL3514.Contig2_CmRNA	GO:0006281	GO:0003676	GO:0043231
CL3517.Contig1_CmRNA	GO:0008152	GO:0016787
CL3517.Contig2_CmRNA	GO:0043170	GO:0016787
CL3523.Contig1_CmRNA	GO:0031224	GO:0009206	GO:0046872	GO:0006811	GO:0005548	GO:0006869	GO:0009207	GO:0019829	GO:0032559
CL3523.Contig2_CmRNA	GO:0031224	GO:0042625	GO:0046872	GO:0009206	GO:0005548	GO:0006869	GO:0032559
CL3524.Contig1_CmRNA	GO:0065007	GO:0006810	GO:0019915	GO:0044424
CL3524.Contig2_CmRNA	GO:0010970	GO:0005488	GO:0044444	GO:0019915	GO:0044238	GO:0015630	GO:0032879
CL3531.Contig1_CmRNA	GO:0010467	GO:0030529	GO:0005198
CL3531.Contig2_CmRNA	GO:0010467	GO:0030529	GO:0005198
CL3533.Contig1_CmRNA	GO:0006818	GO:0006412	GO:0015078	GO:0016876	GO:0006754	GO:0032559	GO:0000275	GO:0015662
CL3533.Contig2_CmRNA	GO:0006818	GO:0006412	GO:0015078	GO:0016876	GO:0006754	GO:0032559	GO:0000275	GO:0015662
CL3537.Contig1_CmRNA	GO:0006596	GO:0016831
CL3537.Contig2_CmRNA	GO:0006596	GO:0016831
CL547.Contig1_CmRNA	GO:0019866	GO:0006629	GO:0044439	GO:0006810	GO:0031224
CL554.Contig2_CmRNA	GO:0005488
CL554.Contig3_CmRNA	GO:0005488
CL557.Contig1_CmRNA	GO:0032561	GO:0004871	GO:0017111	GO:0016020	GO:0043231	GO:0030003	GO:0048200	GO:0019915	GO:0009207	GO:0030016	GO:0048856	GO:0050688	GO:0006897	GO:0006464	GO:0001505	GO:0012505	GO:0035556
CL557.Contig2_CmRNA	GO:0032561	GO:0004871	GO:0017111	GO:0016020	GO:0043231	GO:0030003	GO:0048200	GO:0019915	GO:0009207	GO:0030016	GO:0048856	GO:0050688	GO:0006897	GO:0006464	GO:0001505	GO:0012505	GO:0035556
CL558.Contig1_CmRNA	GO:0008233
CL558.Contig2_CmRNA	GO:0016787
CL559.Contig1_CmRNA	GO:0006950
CL564.Contig1_CmRNA	GO:0006351	GO:0003677	GO:0001071	GO:0005515
CL564.Contig2_CmRNA	GO:0006351	GO:0003677	GO:0001071	GO:0005515
CL568.Contig1_CmRNA	GO:0005488	GO:0005622
CL572.Contig1_CmRNA	GO:0005488	GO:0016020
CL572.Contig2_CmRNA	GO:0005488	GO:0016020
CL577.Contig1_CmRNA	GO:0003676	GO:0044464	GO:0046914
CL578.Contig1_CmRNA	GO:0015669	GO:0044421	GO:0022892
CL585.Contig1_CmRNA	GO:0016787	GO:0044238
CL585.Contig2_CmRNA	GO:0016787	GO:0010467	GO:0044267
CL593.Contig1_CmRNA	GO:0001745	GO:0046914	GO:0003676	GO:0061061	GO:0007399	GO:0043231	GO:0044444	GO:0012501	GO:0060180
CL593.Contig2_CmRNA	GO:0001745	GO:0046914	GO:0003676	GO:0061061	GO:0007399	GO:0043231	GO:0044444	GO:0012501	GO:0060180
CL596.Contig1_CmRNA	GO:0043412	GO:0016671
CL597.Contig1_CmRNA	GO:0009056
CL599.Contig1_CmRNA	GO:0016491	GO:0008152	GO:0005506
CL602.Contig1_CmRNA	GO:0016620	GO:0044237
CL602.Contig2_CmRNA	GO:0016620	GO:0044237
CL602.Contig3_CmRNA	GO:0016620	GO:0044237
CL602.Contig4_CmRNA	GO:0016620	GO:0044237
CL605.Contig2_CmRNA	GO:0005681
CL607.Contig2_CmRNA	GO:0009653	GO:0031323	GO:0006955	GO:0042742	GO:0048583	GO:0002252	GO:0006468	GO:0001654	GO:0048522	GO:0004709	GO:0000165
CL607.Contig3_CmRNA	GO:0009653	GO:0000166	GO:0031323	GO:0006955	GO:0042742	GO:0048583	GO:0002252	GO:0006468	GO:0001654	GO:0048522	GO:0004709	GO:0000165
CL608.Contig1_CmRNA	GO:0008135	GO:0043234	GO:0030695	GO:0006412	GO:0015630
CL608.Contig2_CmRNA	GO:0006412	GO:0030695	GO:0043234	GO:0015630	GO:0008135	GO:0016740	GO:0007165
CL611.Contig2_CmRNA	GO:0005875	GO:0009207	GO:0003774	GO:0007017	GO:0032559
CL611.Contig3_CmRNA	GO:0005875	GO:0009207	GO:0003774	GO:0007017	GO:0032559
CL619.Contig1_CmRNA	GO:0008092	GO:0043232	GO:0008064
CL619.Contig2_CmRNA	GO:0008092	GO:0043232	GO:0008064
CL624.Contig1_CmRNA	GO:0060089	GO:0046872	GO:0006351	GO:0001071	GO:0043231	GO:0023052
CL628.Contig1_CmRNA	GO:0044464	GO:0003723
CL633.Contig1_CmRNA	GO:0007613	GO:0009060
CL633.Contig2_CmRNA	GO:0007613	GO:0009060	GO:0005488
CL639.Contig1_CmRNA	GO:0016564	GO:0003824	GO:0046914
CL645.Contig1_CmRNA	GO:0005488	GO:0008233
CL645.Contig2_CmRNA	GO:0005488	GO:0008233
CL651.Contig1_CmRNA	GO:0005488
CL653.Contig1_CmRNA	GO:0006351	GO:0004871	GO:0006950	GO:0007165	GO:0004112	GO:0005198
CL653.Contig2_CmRNA	GO:0006351	GO:0004871	GO:0006950	GO:0007165	GO:0004112	GO:0005198
CL659.Contig1_CmRNA	GO:0016591	GO:0019538	GO:0005488	GO:0000725	GO:0016787
CL659.Contig2_CmRNA	GO:0016591	GO:0019538	GO:0005488	GO:0000725	GO:0016787
CL669.Contig1_CmRNA	GO:0006810
CL669.Contig2_CmRNA	GO:0006810
CL670.Contig1_CmRNA	GO:0050896	GO:0032559
CL670.Contig2_CmRNA	GO:0050896	GO:0032559
CL672.Contig1_CmRNA	GO:0016491	GO:0008152	GO:0005506
CL672.Contig2_CmRNA	GO:0016491	GO:0008152	GO:0005506
CL674.Contig1_CmRNA	GO:0030427	GO:0005818	GO:0070161	GO:0001558	GO:0016198	GO:0008092	GO:0007420	GO:0035148	GO:0035146	GO:0001709	GO:0007019	GO:0060541	GO:0044444
CL674.Contig2_CmRNA	GO:0030427	GO:0005818	GO:0070161	GO:0001558	GO:0016198	GO:0008092	GO:0046872	GO:0007420	GO:0035148	GO:0035146	GO:0022402	GO:0001709	GO:0007019	GO:0060541	GO:0044444
CL683.Contig1_CmRNA	GO:0015002	GO:0005746	GO:0010259	GO:0022904	GO:0042598
CL683.Contig2_CmRNA	GO:0015002	GO:0005746	GO:0010259	GO:0022904	GO:0042598
CL684.Contig1_CmRNA	GO:0016787
CL685.Contig1_CmRNA	GO:0006464	GO:0016791	GO:0043231	GO:0006796
CL692.Contig1_CmRNA	GO:0031224	GO:0042625	GO:0009206	GO:0022890	GO:0006812	GO:0032559
CL692.Contig2_CmRNA	GO:0009605	GO:0007626	GO:0007267	GO:0007043	GO:0043231	GO:0043296	GO:0010259	GO:0008556	GO:0035151	GO:0006812	GO:0009792	GO:0032559	GO:0009628	GO:0050877	GO:0009206	GO:0005887	GO:0007416	GO:0048871
CL692.Contig3_CmRNA	GO:0009605	GO:0007626	GO:0007267	GO:0007043	GO:0000166	GO:0043231	GO:0043296	GO:0010259	GO:0008556	GO:0035151	GO:0006812	GO:0009792	GO:0009628	GO:0050877	GO:0005887	GO:0008152	GO:0007416	GO:0048871
CL692.Contig4_CmRNA	GO:0009605	GO:0007626	GO:0007267	GO:0007043	GO:0043231	GO:0043296	GO:0010259	GO:0008556	GO:0035151	GO:0006812	GO:0009792	GO:0032559	GO:0009628	GO:0050877	GO:0009206	GO:0005887	GO:0007416	GO:0048871
CL692.Contig5_CmRNA	GO:0009605	GO:0007626	GO:0007267	GO:0007043	GO:0000166	GO:0043231	GO:0043296	GO:0010259	GO:0008556	GO:0035151	GO:0006812	GO:0009792	GO:0009628	GO:0050877	GO:0005887	GO:0008152	GO:0007416	GO:0048871
CL692.Contig6_CmRNA	GO:0009605	GO:0007626	GO:0007267	GO:0007043	GO:0043231	GO:0043296	GO:0010259	GO:0008556	GO:0035151	GO:0006812	GO:0009792	GO:0032559	GO:0009628	GO:0050877	GO:0009206	GO:0005887	GO:0007416	GO:0048871
CL699.Contig1_CmRNA	GO:0016879	GO:0006464	GO:0032559
CL699.Contig2_CmRNA	GO:0016879	GO:0006464	GO:0032559
CL707.Contig2_CmRNA	GO:0015031	GO:0044464
CL708.Contig1_CmRNA	GO:0032561	GO:0005515	GO:0017111	GO:0005626	GO:0000323	GO:0009207	GO:0008105	GO:0005768	GO:0006892	GO:0001505	GO:0005798	GO:0005783	GO:0030141	GO:0044459	GO:0046903	GO:0035556
CL710.Contig1_CmRNA	GO:0044464	GO:0009987
CL710.Contig2_CmRNA	GO:0044464	GO:0009987
CL714.Contig2_CmRNA	GO:0044424
CL716.Contig1_CmRNA	GO:0005488
CL716.Contig2_CmRNA	GO:0005488	GO:0031981
CL720.Contig1_CmRNA	GO:0032991	GO:0042221	GO:0005515	GO:0050658	GO:0006357	GO:0006605	GO:0042175	GO:0009894	GO:0003676	GO:0022892	GO:0033157	GO:0016604	GO:0000775	GO:0033365	GO:0044444	GO:0046605
CL723.Contig2_CmRNA	GO:0000323
CL724.Contig1_CmRNA	GO:0031224	GO:0042625	GO:0046872	GO:0009206	GO:0005548	GO:0006869	GO:0032559
CL724.Contig2_CmRNA	GO:0031224	GO:0042625	GO:0046872	GO:0009206	GO:0005548	GO:0006869	GO:0032559
CL724.Contig3_CmRNA	GO:0031224	GO:0042625	GO:0046872	GO:0009206	GO:0005548	GO:0006869	GO:0032559
CL727.Contig6_CmRNA	GO:0005488
CL728.Contig8_CmRNA	GO:0030139	GO:0031090	GO:0031981	GO:0051091	GO:0050851	GO:0006259	GO:0051320	GO:0030330	GO:0043066	GO:0007173	GO:0043161	GO:0002224	GO:0007249	GO:0051439	GO:0016192	GO:0000165	GO:0001818	GO:0005488	GO:0006917
CL734.Contig1_CmRNA	GO:0003712	GO:0003676	GO:0016604	GO:0000377	GO:0006405	GO:0006397	GO:0006353
CL734.Contig2_CmRNA	GO:0003712	GO:0003676	GO:0016604	GO:0000377	GO:0006405	GO:0006397	GO:0006353
CL735.Contig1_CmRNA	GO:0000578	GO:0005102	GO:0007169
CL740.Contig1_CmRNA	GO:0070011
CL748.Contig1_CmRNA	GO:0005488
CL757.Contig1_CmRNA	GO:0004674	GO:0006464	GO:0032559
CL757.Contig2_CmRNA	GO:0004674	GO:0006464	GO:0032559
CL758.Contig1_CmRNA	GO:0003676	GO:0016779
CL758.Contig2_CmRNA	GO:0005488	GO:0016740
CL759.Contig1_CmRNA	GO:0032559	GO:0050896
CL759.Contig2_CmRNA	GO:0032559	GO:0050896
CL778.Contig1_CmRNA	GO:0003824
CL782.Contig1_CmRNA	GO:0006810
Unigene1001_CmRNA	GO:0003824
Unigene1007_CmRNA	GO:0035264	GO:0005083	GO:0044464	GO:0032011
Unigene10087_CmRNA	GO:0017111	GO:0005488
Unigene10089_CmRNA	GO:0044464
Unigene10090_CmRNA	GO:0032787	GO:0016877
Unigene10092_CmRNA	GO:0031224	GO:0017111	GO:0006996	GO:0031966	GO:0009207	GO:0006944	GO:0032561
Unigene10098_CmRNA	GO:0005515	GO:0044428
Unigene10103_CmRNA	GO:0008152	GO:0043234	GO:0003824
Unigene10105_CmRNA	GO:0006730	GO:0008174	GO:0034641
Unigene1010_CmRNA	GO:0007165	GO:0000166
Unigene10110_CmRNA	GO:0016787
Unigene10113_CmRNA	GO:0003824
Unigene10115_CmRNA	GO:0044444	GO:0016192	GO:0016236	GO:0048753	GO:0015031
Unigene10118_CmRNA	GO:0016787
Unigene10119_CmRNA	GO:0005488	GO:0006260	GO:0016740	GO:0044428
Unigene10122_CmRNA	GO:0002165	GO:0006915	GO:0007435	GO:0048812	GO:0008152
Unigene10124_CmRNA	GO:0031032	GO:0009888	GO:0004674	GO:0031674	GO:0005198
Unigene10125_CmRNA	GO:0005488	GO:0044297	GO:0008049	GO:0005227	GO:0042221	GO:0042995	GO:0030001	GO:0007622	GO:0005887	GO:0005267
Unigene10128_CmRNA	GO:0006546	GO:0016628	GO:0048037	GO:0016642
Unigene10130_CmRNA	GO:0031012	GO:0009653
Unigene10131_CmRNA	GO:0005488
Unigene10132_CmRNA	GO:0044424
Unigene10139_CmRNA	GO:0009987	GO:0016020
Unigene10140_CmRNA	GO:0031224	GO:0005515	GO:0004812	GO:0006418	GO:0015960	GO:0044424	GO:0032559
Unigene10148_CmRNA	GO:0044421	GO:0044444	GO:0042221	GO:0035090
Unigene10150_CmRNA	GO:0006357	GO:0043231	GO:0003712	GO:0000902	GO:0042802	GO:0045595	GO:0048523	GO:0032501
Unigene10152_CmRNA	GO:0000377	GO:0005681
Unigene10157_CmRNA	GO:0043231	GO:0003676
Unigene10164_CmRNA	GO:0004175	GO:0019538	GO:0042623	GO:0032559	GO:0044429
Unigene10168_CmRNA	GO:0005488	GO:0001510	GO:0043231	GO:0006397	GO:0008171
Unigene10169_CmRNA	GO:0007050	GO:0008278	GO:0006396	GO:0006996	GO:0035556	GO:0031981	GO:0009628	GO:0033554	GO:0007059	GO:0000775	GO:0022403	GO:0046983	GO:0032559	GO:0010948
Unigene10171_CmRNA	GO:0005905	GO:0012510	GO:0015031
Unigene10172_CmRNA	GO:0003899	GO:0005488	GO:0031981	GO:0000723	GO:0006261	GO:0051320
Unigene10175_CmRNA	GO:0016301	GO:0006464	GO:0032559
Unigene10176_CmRNA	GO:0005198
Unigene10177_CmRNA	GO:0005840
Unigene10179_CmRNA	GO:0009108	GO:0016616
Unigene10180_CmRNA	GO:0046914
Unigene10181_CmRNA	GO:0005488
Unigene10184_CmRNA	GO:0008152	GO:0004033
Unigene10187_CmRNA	GO:0003676
Unigene10190_CmRNA	GO:0016881	GO:0006464
Unigene10194_CmRNA	GO:0043062	GO:0035151	GO:0006909	GO:0035148	GO:0002168	GO:0040003	GO:0030120	GO:0019915	GO:0044431	GO:0015031	GO:0051649	GO:0035146
Unigene10197_CmRNA	GO:0016747
Unigene10199_CmRNA	GO:0022892	GO:0010876
Unigene1019_CmRNA	GO:0044238	GO:0004553	GO:0043167
Unigene10203_CmRNA	GO:0031224
Unigene10204_CmRNA	GO:0009987	GO:0004114	GO:0000166	GO:0008152	GO:0044464
Unigene10208_CmRNA	GO:0000315	GO:0010467	GO:0005198
Unigene10213_CmRNA	GO:0046872
Unigene10214_CmRNA	GO:0000377	GO:0043234	GO:0005681	GO:0032446	GO:0019787	GO:0015630
Unigene10215_CmRNA	GO:0005488
Unigene10216_CmRNA	GO:0019866	GO:0046914	GO:0043623
Unigene10217_CmRNA	GO:0030528	GO:0031981
Unigene10218_CmRNA	GO:0004672	GO:0044267	GO:0000166
Unigene10219_CmRNA	GO:0016859	GO:0043231	GO:0044267	GO:0007169
Unigene10220_CmRNA	GO:0016491	GO:0008152	GO:0005506
Unigene10221_CmRNA	GO:0017111	GO:0000166	GO:0016020
Unigene10222_CmRNA	GO:0005237	GO:0005886	GO:0006810	GO:0044425
Unigene10224_CmRNA	GO:0009888	GO:0012501	GO:0033379	GO:0030279	GO:0005764	GO:0016798	GO:0006508	GO:0012505	GO:0030141	GO:0044421	GO:0050707	GO:0033368
Unigene10225_CmRNA	GO:0003824
Unigene10229_CmRNA	GO:0005681	GO:0000377	GO:0045069	GO:0006397	GO:0034518	GO:0016246
Unigene10233_CmRNA	GO:0016740
Unigene10235_CmRNA	GO:0009235	GO:0016765	GO:0032559
Unigene10240_CmRNA	GO:0007166	GO:0032991	GO:0017148	GO:0007017	GO:0043231	GO:0003006	GO:0030371	GO:0003727	GO:0000377	GO:0007476	GO:0003729
Unigene10241_CmRNA	GO:0044238	GO:0016787
Unigene10245_CmRNA	GO:0010467	GO:0030529	GO:0005198
Unigene10251_CmRNA	GO:0043231	GO:0004871	GO:0006909	GO:0005515	GO:0048193
Unigene10253_CmRNA	GO:0012502	GO:0043231	GO:0016020
Unigene10254_CmRNA	GO:0007266	GO:0005088	GO:0060089	GO:0010769	GO:0044424	GO:0043169	GO:0031344
Unigene10258_CmRNA	GO:0006950
Unigene10260_CmRNA	GO:0017111	GO:0015629	GO:0032559
Unigene10268_CmRNA	GO:0009987
Unigene10273_CmRNA	GO:0007613	GO:0009060	GO:0003676	GO:0003824
Unigene10275_CmRNA	GO:0008168	GO:0006479
Unigene10280_CmRNA	GO:0043231
Unigene10283_CmRNA	GO:0019538	GO:0004175
Unigene10284_CmRNA	GO:0017111	GO:0031981	GO:0046872	GO:0022613	GO:0009207	GO:0032561
Unigene10285_CmRNA	GO:0043231	GO:0043234	GO:0004812	GO:0006418	GO:0016597	GO:0005737	GO:0032559
Unigene10296_CmRNA	GO:0019752	GO:0003824	GO:0048037
Unigene10297_CmRNA	GO:0006810
Unigene10299_CmRNA	GO:0031572	GO:0031647
Unigene1029_CmRNA	GO:0044424
Unigene10302_CmRNA	GO:0046872	GO:0003676	GO:0043170	GO:0044238
Unigene10309_CmRNA	GO:0009790	GO:0042802	GO:0008354	GO:0016791	GO:0003006	GO:0031224	GO:0006796
Unigene1030_CmRNA	GO:0004721	GO:0006796	GO:0006464
Unigene10310_CmRNA	GO:0005975	GO:0044424	GO:0030246	GO:0008483
Unigene10311_CmRNA	GO:0006726	GO:0005488	GO:0017111
Unigene10313_CmRNA	GO:0046872	GO:0031224
Unigene10314_CmRNA	GO:0006909	GO:0016021	GO:0002252	GO:0048102	GO:0030100	GO:0002274	GO:0004888	GO:0006950
Unigene10317_CmRNA	GO:0031224	GO:0017111	GO:0006810	GO:0009207	GO:0015405	GO:0032559
Unigene10322_CmRNA	GO:0031224	GO:0005253	GO:0017111	GO:0009207	GO:0015698	GO:0015405	GO:0032559
Unigene10325_CmRNA	GO:0060089	GO:0006351	GO:0023052
Unigene10330_CmRNA	GO:0005488	GO:0043231	GO:0000307	GO:0006355	GO:0006352	GO:0016251	GO:0031572	GO:0019887
Unigene10331_CmRNA	GO:0043231	GO:0005488
Unigene10332_CmRNA	GO:0007416	GO:0050804	GO:0000149	GO:0022857	GO:0006887	GO:0044464
Unigene10334_CmRNA	GO:0005488
Unigene10338_CmRNA	GO:0006357	GO:0017053	GO:0016564	GO:0003677
Unigene10340_CmRNA	GO:0006506
Unigene10344_CmRNA	GO:0009987	GO:0005488	GO:0005622	GO:0040007	GO:0009653	GO:0003006
Unigene10346_CmRNA	GO:0008360	GO:0044448	GO:0005884	GO:0031589	GO:0030036
Unigene10363_CmRNA	GO:0018988	GO:0006066	GO:0030301	GO:0006694	GO:0016020
Unigene10370_CmRNA	GO:0006810	GO:0031224
Unigene10371_CmRNA	GO:0043231	GO:0017110	GO:0009181
Unigene10375_CmRNA	GO:0006259	GO:0003676
Unigene1037_CmRNA	GO:0019866	GO:0046907	GO:0043231	GO:0031224	GO:0005215
Unigene10384_CmRNA	GO:0043231
Unigene1038_CmRNA	GO:0006412	GO:0043234	GO:0003747	GO:0044444	GO:0048102	GO:0006886	GO:0007166
Unigene10391_CmRNA	GO:0019216	GO:0043231	GO:0043234	GO:0006357	GO:0007049	GO:0005515
Unigene10392_CmRNA	GO:0046914
Unigene10395_CmRNA	GO:0015031	GO:0022892
Unigene10398_CmRNA	GO:0012505	GO:0006915	GO:0035251	GO:0031090
Unigene10399_CmRNA	GO:0009894	GO:0043234
Unigene1039_CmRNA	GO:0044459	GO:0006810	GO:0031224	GO:0005234
Unigene10408_CmRNA	GO:0046914	GO:0009605	GO:0007626	GO:0008360	GO:0048812	GO:0043231	GO:0006357	GO:0007424	GO:0003006	GO:0045165	GO:0035150	GO:0002118	GO:0003676	GO:0003702	GO:0005694	GO:0042802	GO:0035146	GO:0042335	GO:0042051	GO:0016564
Unigene10410_CmRNA	GO:0008152	GO:0016903
Unigene10411_CmRNA	GO:0016251	GO:0043234	GO:0043231	GO:0006355
Unigene10418_CmRNA	GO:0016868	GO:0044424	GO:0006013
Unigene1041_CmRNA	GO:0003677	GO:0017111	GO:0032559	GO:0000790
Unigene10420_CmRNA	GO:0012505	GO:0004871	GO:0031224	GO:0031090	GO:0043231
Unigene10421_CmRNA	GO:0019866	GO:0006743	GO:0043231
Unigene10426_CmRNA	GO:0015031	GO:0022892
Unigene10427_CmRNA	GO:0006468	GO:0018988	GO:0043234	GO:0030036	GO:0007268	GO:0007017	GO:0000166	GO:0016301	GO:0019935	GO:0008306	GO:0010033	GO:0019887
Unigene10430_CmRNA	GO:0007275	GO:0044464
Unigene10431_CmRNA	GO:0007507	GO:0030017	GO:0044260	GO:0055002	GO:0009653	GO:0060255	GO:0005515	GO:0071844	GO:0031032	GO:0050896	GO:0016740	GO:0019219
Unigene10436_CmRNA	GO:0009987	GO:0003723	GO:0032991	GO:0005730	GO:0005216
Unigene1043_CmRNA	GO:0019538	GO:0046914	GO:0006691	GO:0070011
Unigene10444_CmRNA	GO:0009987
Unigene10446_CmRNA	GO:0009451	GO:0003676
Unigene10447_CmRNA	GO:0006935	GO:0016337	GO:0005515	GO:0008037	GO:0016020
Unigene10448_CmRNA	GO:0046872
Unigene10450_CmRNA	GO:0006595	GO:0044424
Unigene10451_CmRNA	GO:0016301	GO:0008152
Unigene10452_CmRNA	GO:0019752	GO:0016790
Unigene10453_CmRNA	GO:0003676	GO:0046914
Unigene10456_CmRNA	GO:0005488	GO:0016787
Unigene10459_CmRNA	GO:0005488	GO:0004672	GO:0009987
Unigene10464_CmRNA	GO:0005488	GO:0050794	GO:0040007
Unigene10472_CmRNA	GO:0044267	GO:0016787
Unigene10473_CmRNA	GO:0007411	GO:0043005	GO:0004871	GO:0006796	GO:0060541	GO:0004725	GO:0016740	GO:0016020	GO:0006464
Unigene10481_CmRNA	GO:0032561	GO:0032156	GO:0017111	GO:0051179	GO:0009207	GO:0030030	GO:0044446	GO:0044444	GO:0005634
Unigene10482_CmRNA	GO:0016477	GO:0005681	GO:0016604	GO:0007272	GO:0000380	GO:0045165	GO:0001742	GO:0048699
Unigene10485_CmRNA	GO:0044464	GO:0006013	GO:0048037	GO:0016836
Unigene10488_CmRNA	GO:0006351	GO:0006909	GO:0046914	GO:0003677	GO:0001071	GO:0044464
Unigene10491_CmRNA	GO:0044249	GO:0016831
Unigene10493_CmRNA	GO:0006952	GO:0023052	GO:0004872	GO:0044425
Unigene10495_CmRNA	GO:0008565	GO:0006605	GO:0001708	GO:0007169	GO:0017016	GO:0003002	GO:0005635	GO:0005049	GO:0042051	GO:0044444	GO:0007476	GO:0043066	GO:0000165
Unigene10496_CmRNA	GO:0000377	GO:0005681
Unigene10497_CmRNA	GO:0005506	GO:0044238	GO:0003824
Unigene10498_CmRNA	GO:0000278	GO:0022402	GO:0043232	GO:0051234	GO:0016043
Unigene10503_CmRNA	GO:0005543	GO:0009987
Unigene10506_CmRNA	GO:0005488
Unigene10507_CmRNA	GO:0016020	GO:0016798	GO:0008152
Unigene10510_CmRNA	GO:0006351
Unigene10517_CmRNA	GO:0070011
Unigene10522_CmRNA	GO:0046914	GO:0015924	GO:0019318
Unigene10526_CmRNA	GO:0005488
Unigene10532_CmRNA	GO:0005506
Unigene10533_CmRNA	GO:0005515
Unigene10535_CmRNA	GO:0046914	GO:0043231	GO:0031062	GO:0032776	GO:0003676	GO:0008757	GO:0031061
Unigene10537_CmRNA	GO:0006412	GO:0043231	GO:0000122	GO:0008135
Unigene10539_CmRNA	GO:0007166	GO:0031224	GO:0004888
Unigene10543_CmRNA	GO:0030120	GO:0016044	GO:0000267	GO:0048193	GO:0005576	GO:0015031
Unigene10544_CmRNA	GO:0016874
Unigene10546_CmRNA	GO:0009987
Unigene10550_CmRNA	GO:0008152	GO:0003824
Unigene10552_CmRNA	GO:0016790	GO:0004175	GO:0048870	GO:0007186	GO:0046914	GO:0006935	GO:0016579	GO:0005737
Unigene10553_CmRNA	GO:0006464	GO:0006950	GO:0031090	GO:0043231	GO:0031224	GO:0019787	GO:0032559
Unigene10554_CmRNA	GO:0000278	GO:0006261	GO:0005488	GO:0003678
Unigene10556_CmRNA	GO:0005488
Unigene10558_CmRNA	GO:0030246
Unigene10561_CmRNA	GO:0005488	GO:0016787
Unigene10565_CmRNA	GO:0030117	GO:0043231	GO:0015031
Unigene10567_CmRNA	GO:0005905	GO:0012510	GO:0015031
Unigene10573_CmRNA	GO:0044446	GO:0007270	GO:0030427	GO:0004674	GO:0051049	GO:0043005	GO:0048519	GO:0007411	GO:0006887	GO:0005102	GO:0043065	GO:0021543	GO:0015031	GO:0016477	GO:0043231	GO:0032559	GO:0007165	GO:0030546	GO:0031323	GO:0048646	GO:0007599	GO:0060341	GO:0006913	GO:0045202	GO:0018105	GO:0007049	GO:0006950	GO:0044444	GO:0021549	GO:0007610	GO:0044297
Unigene10583_CmRNA	GO:0006810	GO:0016021	GO:0005326	GO:0015291	GO:0080134	GO:0007154	GO:0004888	GO:0042065
Unigene10595_CmRNA	GO:0051234	GO:0031224
Unigene10596_CmRNA	GO:0006952	GO:0016791	GO:0023052	GO:0031224	GO:0004872
Unigene10604_CmRNA	GO:0003723	GO:0005681	GO:0046914	GO:0007563	GO:0000377	GO:0007010	GO:0000087	GO:0048511	GO:0007626	GO:0033036	GO:0007300
Unigene10612_CmRNA	GO:0004553	GO:0030247	GO:0006026	GO:0043167
Unigene10616_CmRNA	GO:0006470	GO:0031981	GO:0051443	GO:0000077	GO:0004721
Unigene1061_CmRNA	GO:0003824
Unigene10620_CmRNA	GO:0046872	GO:0035556	GO:0032561	GO:0034643	GO:0003824	GO:0031966
Unigene10623_CmRNA	GO:0016740
Unigene10624_CmRNA	GO:0032501	GO:0003676	GO:0043231
Unigene10625_CmRNA	GO:0046914
Unigene10629_CmRNA	GO:0009987	GO:0048232	GO:0032502
Unigene1062_CmRNA	GO:0016787
Unigene10630_CmRNA	GO:0043062	GO:0004175	GO:0046914	GO:0030247	GO:0031012	GO:0051346	GO:0006022	GO:0004866	GO:0005198
Unigene10631_CmRNA	GO:0001505	GO:0030136	GO:0006810	GO:0031224	GO:0007186	GO:0004888
Unigene10636_CmRNA	GO:0006412	GO:0043021	GO:0031981	GO:0008135	GO:0007166	GO:0005882	GO:0042255
Unigene10639_CmRNA	GO:0031224
Unigene10640_CmRNA	GO:0044464	GO:0046914	GO:0003676	GO:0032446	GO:0019787
Unigene10641_CmRNA	GO:0006351	GO:0005515	GO:0006259	GO:0009207	GO:0043189	GO:0004386	GO:0035097	GO:0032559	GO:0003677	GO:0016573
Unigene10643_CmRNA	GO:0017111	GO:0046872	GO:0006811	GO:0016791	GO:0009207	GO:0032561	GO:0015075
Unigene10644_CmRNA	GO:0016874
Unigene10645_CmRNA	GO:0019725
Unigene10649_CmRNA	GO:0023052	GO:0004713	GO:0035216	GO:0005515	GO:0016198	GO:0007431	GO:0008306
Unigene10650_CmRNA	GO:0030528	GO:0009888	GO:0043231	GO:0000768	GO:0001071	GO:0003677	GO:0048513	GO:0045137	GO:0006351
Unigene10652_CmRNA	GO:0009233	GO:0031224	GO:0016765
Unigene10653_CmRNA	GO:0004812	GO:0006418	GO:0032559	GO:0044424
Unigene10655_CmRNA	GO:0006351	GO:0043231
Unigene10661_CmRNA	GO:0044421	GO:0044464
Unigene10662_CmRNA	GO:0006357	GO:0030098	GO:0010557	GO:0043234	GO:0002285	GO:0031328	GO:0042981	GO:0042036	GO:0051101	GO:0005515	GO:0042990	GO:0044424	GO:0033554	GO:0007166	GO:0002224	GO:0035556	GO:0051707	GO:0006959	GO:0002460
Unigene10663_CmRNA	GO:0032561	GO:0043231
Unigene10664_CmRNA	GO:0006810
Unigene10665_CmRNA	GO:0016884	GO:0006188
Unigene10668_CmRNA	GO:0046914	GO:0044255	GO:0006662	GO:0043231	GO:0016714	GO:0044425
Unigene10670_CmRNA	GO:0005102	GO:0002090	GO:0016198	GO:0044424	GO:0016879	GO:0032446	GO:0044089	GO:0008593
Unigene10681_CmRNA	GO:0016884	GO:0019359	GO:0016787	GO:0032559
Unigene10682_CmRNA	GO:0007169	GO:0060446	GO:0007509	GO:0044424
Unigene10684_CmRNA	GO:0016811	GO:0009064	GO:0016023	GO:0031224	GO:0007611
Unigene10688_CmRNA	GO:0044421	GO:0005488	GO:0030198
Unigene10689_CmRNA	GO:0005488	GO:0043231	GO:0006818	GO:0008746	GO:0008152
Unigene10690_CmRNA	GO:0017111	GO:0003676	GO:0032559
Unigene10692_CmRNA	GO:0044464	GO:0008324	GO:0006812
Unigene10693_CmRNA	GO:0042742	GO:0006909	GO:0002252	GO:0031224
Unigene10694_CmRNA	GO:0046914
Unigene10695_CmRNA	GO:0006352	GO:0005667
Unigene10699_CmRNA	GO:0005488	GO:0016787
Unigene10701_CmRNA	GO:0005815	GO:0005099	GO:0043231	GO:0032313
Unigene10702_CmRNA	GO:0043231
Unigene10705_CmRNA	GO:0043436	GO:0006665	GO:0031227	GO:0048037	GO:0016832
Unigene10708_CmRNA	GO:0043231	GO:0046914	GO:0006342
Unigene1070_CmRNA	GO:0009987	GO:0016740
Unigene10710_CmRNA	GO:0006952	GO:0044444	GO:0005102	GO:0019899	GO:0006796	GO:0023052
Unigene10713_CmRNA	GO:0008135	GO:0030528	GO:0006352	GO:0005667	GO:0006412
Unigene10714_CmRNA	GO:0006810
Unigene10715_CmRNA	GO:0004497	GO:0050662	GO:0008152
Unigene10718_CmRNA	GO:0005488	GO:0006915	GO:0000737	GO:0016491	GO:0005740	GO:0042598	GO:0016020
Unigene10719_CmRNA	GO:0043436	GO:0016830	GO:0048037
Unigene10721_CmRNA	GO:0044424	GO:0051179	GO:0009987	GO:0005488
Unigene10724_CmRNA	GO:0005634	GO:0006396
Unigene10726_CmRNA	GO:0008233
Unigene10730_CmRNA	GO:0009954	GO:0005488	GO:0007525	GO:0045216	GO:0043232	GO:0021782	GO:0016327	GO:0044444	GO:0048513	GO:0035150	GO:0009653	GO:0009790	GO:0071842
Unigene10732_CmRNA	GO:0006810
Unigene10737_CmRNA	GO:0044464	GO:0009966	GO:0030695	GO:0035556
Unigene1073_CmRNA	GO:0050896	GO:0019538	GO:0050794	GO:0005737
Unigene10745_CmRNA	GO:0009207	GO:0016887	GO:0015075	GO:0032559
Unigene10747_CmRNA	GO:0046872	GO:0009987
Unigene10752_CmRNA	GO:0016741	GO:0046914	GO:0003676	GO:0006730	GO:0043231
Unigene10756_CmRNA	GO:0030119	GO:0006357	GO:0006901	GO:0048333	GO:0030130	GO:0007517	GO:0001708	GO:0015031	GO:0000981	GO:0022892	GO:0003677	GO:0048565	GO:0001505
Unigene10757_CmRNA	GO:0046914	GO:0018216	GO:0044444	GO:0016274
Unigene10760_CmRNA	GO:0055103	GO:0009966	GO:0043392	GO:0051179	GO:0031398	GO:0032559	GO:0043549	GO:0002237	GO:0048523	GO:0044424	GO:0019901	GO:0031331	GO:0016301
Unigene10762_CmRNA	GO:0005488
Unigene10764_CmRNA	GO:0031589	GO:0046872	GO:0044464	GO:0006464
Unigene10767_CmRNA	GO:0007166	GO:0004871	GO:0005887
Unigene10768_CmRNA	GO:0009790	GO:0005622	GO:0002164
Unigene10771_CmRNA	GO:0004672	GO:0006464	GO:0032559
Unigene10779_CmRNA	GO:0005083	GO:0046914	GO:0032012
Unigene10784_CmRNA	GO:0015630	GO:0016616	GO:0009062	GO:0005759	GO:0048037	GO:0016836
Unigene10785_CmRNA	GO:0016791
Unigene10788_CmRNA	GO:0022892	GO:0043231	GO:0030119	GO:0015031
Unigene10792_CmRNA	GO:0000226	GO:0016055	GO:0006959	GO:0007297	GO:0001736	GO:0030036	GO:0044087	GO:0019094	GO:0051235	GO:0004674	GO:0032559	GO:0045171	GO:0006464	GO:0044459	GO:0043195	GO:0044444	GO:0007416
Unigene10795_CmRNA	GO:0031589
Unigene10799_CmRNA	GO:0046872	GO:0070011
Unigene10800_CmRNA	GO:0006464	GO:0030529	GO:0023052	GO:0004674	GO:0032559
Unigene10802_CmRNA	GO:0005875	GO:0005488	GO:0003774
Unigene10806_CmRNA	GO:0008344	GO:0031175	GO:0043005	GO:0021695	GO:0044424
Unigene10807_CmRNA	GO:0032559	GO:0016462
Unigene10808_CmRNA	GO:0003723
Unigene10815_CmRNA	GO:0017111	GO:0046872	GO:0016772	GO:0006796
Unigene10817_CmRNA	GO:0005488
Unigene10819_CmRNA	GO:0005488
Unigene10820_CmRNA	GO:0000377	GO:0005488	GO:0005681
Unigene10822_CmRNA	GO:0000470	GO:0030684	GO:0031981
Unigene10823_CmRNA	GO:0043231
Unigene10827_CmRNA	GO:0043009	GO:0043234	GO:0005488	GO:0009314	GO:0043231	GO:0023052
Unigene10828_CmRNA	GO:0016651	GO:0048037	GO:0022904	GO:0000166	GO:0005746
Unigene10830_CmRNA	GO:0044464
Unigene10831_CmRNA	GO:0016020	GO:0005261	GO:0006810	GO:0009415
Unigene10832_CmRNA	GO:0043412	GO:0003824	GO:0000166
Unigene10833_CmRNA	GO:0015002	GO:0005746	GO:0016755
Unigene10834_CmRNA	GO:0005488
Unigene10835_CmRNA	GO:0008213	GO:0006351	GO:0005488	GO:0043231	GO:0006730	GO:0007635	GO:0008168
Unigene10840_CmRNA	GO:0019941	GO:0000209	GO:0004842	GO:0019899	GO:0032559	GO:0044424
Unigene10842_CmRNA	GO:0008135	GO:0046914	GO:0006730	GO:0070011	GO:0016741	GO:0006412
Unigene10843_CmRNA	GO:0005083	GO:0004672	GO:0046914	GO:0032012	GO:0016791	GO:0032559	GO:0006464
Unigene10844_CmRNA	GO:0032991	GO:0032559	GO:0042623
Unigene10855_CmRNA	GO:0004812	GO:0006418	GO:0032559	GO:0015630
Unigene10861_CmRNA	GO:0006351	GO:0046914	GO:0003677	GO:0001071	GO:0043231
Unigene10864_CmRNA	GO:0006259	GO:0003676
Unigene10866_CmRNA	GO:0015031	GO:0022892
Unigene10867_CmRNA	GO:0008135	GO:0043234	GO:0006413	GO:0044424
Unigene10873_CmRNA	GO:0048731	GO:0022900	GO:0005746	GO:0043648	GO:0009060	GO:0051234	GO:0050662	GO:0000104
Unigene10875_CmRNA	GO:0016791
Unigene10879_CmRNA	GO:0016788
Unigene10880_CmRNA	GO:0007431	GO:0016477
Unigene10882_CmRNA	GO:0016491	GO:0005506
Unigene10886_CmRNA	GO:0035556	GO:0032561	GO:0004620	GO:0016192
Unigene10887_CmRNA	GO:0016301	GO:0006464	GO:0032559
Unigene10889_CmRNA	GO:0046914
Unigene10892_CmRNA	GO:0006476	GO:0017136	GO:0006325	GO:0043231
Unigene10894_CmRNA	GO:0004520
Unigene10895_CmRNA	GO:0015031	GO:0022892
Unigene10899_CmRNA	GO:0070569
Unigene1089_CmRNA	GO:0009987	GO:0044424
Unigene10901_CmRNA	GO:0000785	GO:0000377	GO:0003723	GO:0043231	GO:0030529	GO:0048232
Unigene10903_CmRNA	GO:0005694
Unigene10905_CmRNA	GO:0018011	GO:0035570	GO:0035568	GO:0043231	GO:0000226	GO:0008168
Unigene10906_CmRNA	GO:0004558	GO:0008152
Unigene10910_CmRNA	GO:0031981	GO:0032561	GO:0007548	GO:0018193	GO:0030426	GO:0030518	GO:0010975	GO:0005527	GO:0001655	GO:0008092	GO:0031109	GO:0032559	GO:0008104	GO:0035258	GO:0005856	GO:0016859	GO:0043623	GO:0000041	GO:0044444
Unigene10911_CmRNA	GO:0008152	GO:0003824
Unigene10912_CmRNA	GO:0032501	GO:0044464	GO:0007165	GO:0060089
Unigene10913_CmRNA	GO:0019538	GO:0004180
Unigene10914_CmRNA	GO:0043232	GO:0016787	GO:0042995
Unigene10923_CmRNA	GO:0004812	GO:0006418	GO:0032559	GO:0044424
Unigene10924_CmRNA	GO:0000377	GO:0005681
Unigene10928_CmRNA	GO:0009888	GO:0034968	GO:0016279	GO:0001501
Unigene10935_CmRNA	GO:0006066	GO:0030301	GO:0006694	GO:0018988
Unigene10937_CmRNA	GO:0000090	GO:0005875	GO:0000819	GO:0000226	GO:0003774	GO:0005876	GO:0032559
Unigene10940_CmRNA	GO:0035114	GO:0006351	GO:0007444	GO:0003006	GO:0000902	GO:0048468	GO:0009887	GO:0007292	GO:0050794	GO:0007399
Unigene10942_CmRNA	GO:0016798	GO:0044238	GO:0005488
Unigene10945_CmRNA	GO:0005488	GO:0006810	GO:0043231	GO:0016020
Unigene10947_CmRNA	GO:0004180
Unigene10948_CmRNA	GO:0044424	GO:0044238	GO:0004553
Unigene10950_CmRNA	GO:0046872	GO:0003676
Unigene10952_CmRNA	GO:0006810
Unigene10957_CmRNA	GO:0046872
Unigene10959_CmRNA	GO:0008152	GO:0032561	GO:0008905
Unigene10960_CmRNA	GO:0006464
Unigene10962_CmRNA	GO:0016668	GO:0048598	GO:0001669	GO:0019538	GO:0022904	GO:0042995	GO:0006873	GO:0050662	GO:0003006
Unigene10963_CmRNA	GO:0046872	GO:0003677	GO:0004879	GO:0050794	GO:0006351
Unigene10964_CmRNA	GO:0022892	GO:0010876
Unigene10969_CmRNA	GO:0043062	GO:0035151	GO:0006909	GO:0035148	GO:0030137	GO:0002168	GO:0040003	GO:0030120	GO:0019915	GO:0048193	GO:0015031	GO:0035146
Unigene10970_CmRNA	GO:0032559	GO:0042623
Unigene10971_CmRNA	GO:0016020
Unigene10972_CmRNA	GO:0006909	GO:0043231	GO:0006355	GO:0001071	GO:0008624	GO:0005694	GO:0001666	GO:0035071	GO:0003677	GO:0044248
Unigene10973_CmRNA	GO:0031224	GO:0018988	GO:0006066	GO:0030301	GO:0006694	GO:0004888
Unigene10975_CmRNA	GO:0048731	GO:0017111	GO:0043408	GO:0005701	GO:0003676	GO:0012502	GO:0006935	GO:0070828	GO:0016477
Unigene10978_CmRNA	GO:0006351	GO:0043234	GO:0003676	GO:0001071	GO:0043231
Unigene10981_CmRNA	GO:0004386	GO:0003676	GO:0032392	GO:0044429	GO:0000166
Unigene10984_CmRNA	GO:0004672	GO:0006464	GO:0032559
Unigene10989_CmRNA	GO:0016772	GO:0043169	GO:0043648	GO:0004611	GO:0006796	GO:0032561	GO:0031960	GO:0044429	GO:0000267	GO:0006006
Unigene10996_CmRNA	GO:0006596	GO:0016831
Unigene10999_CmRNA	GO:0030528	GO:0003676	GO:0006351
Unigene11001_CmRNA	GO:0031224	GO:0043231	GO:0019866	GO:0030097	GO:0006826	GO:0048469	GO:0022890	GO:0003006
Unigene11004_CmRNA	GO:0044444	GO:0043231
Unigene11006_CmRNA	GO:0044464	GO:0003824	GO:0008033
Unigene11007_CmRNA	GO:0043229	GO:0048731	GO:0005488	GO:0010038	GO:0048545	GO:0031667	GO:0018065	GO:0016765	GO:0044444	GO:0006779	GO:0014075
Unigene11009_CmRNA	GO:0044424	GO:0023052
Unigene11015_CmRNA	GO:0031090	GO:0008375	GO:0006487
Unigene11017_CmRNA	GO:0003676	GO:0044464	GO:0046914
Unigene1101_CmRNA	GO:0016705	GO:0008152	GO:0016209	GO:0019725
Unigene11020_CmRNA	GO:0007635	GO:0018988	GO:0005739	GO:0016491	GO:0009653	GO:0008202
Unigene11022_CmRNA	GO:0006071	GO:0016901	GO:0046872	GO:0043234	GO:0008344	GO:0043231	GO:0044444	GO:0022904
Unigene11024_CmRNA	GO:0015908	GO:0043231	GO:0019866	GO:0009062	GO:0003333	GO:0019217	GO:0016406
Unigene11026_CmRNA	GO:0006259	GO:0003676	GO:0003824
Unigene1102_CmRNA	GO:0006259	GO:0004519	GO:0007275
Unigene11030_CmRNA	GO:0006464	GO:0004091	GO:0007166	GO:0004713	GO:0032559
Unigene11033_CmRNA	GO:0006629	GO:0008415	GO:0016020
Unigene11035_CmRNA	GO:0003824
Unigene11038_CmRNA	GO:0007281	GO:0033206
Unigene1103_CmRNA	GO:0009790	GO:0040009	GO:0009058	GO:0006522	GO:0043648	GO:0048037	GO:0016846	GO:0002164	GO:0047635
Unigene11042_CmRNA	GO:0006810	GO:0017111	GO:0035556	GO:0004620	GO:0009207	GO:0005769	GO:0032561	GO:0012506
Unigene11045_CmRNA	GO:0009314	GO:0001101	GO:0034698	GO:0009267	GO:0016884	GO:0042802	GO:0014070	GO:0048513	GO:0000267	GO:0006528
Unigene11046_CmRNA	GO:0035437	GO:0043231	GO:0010556	GO:0044444	GO:0009895	GO:0031090
Unigene11049_CmRNA	GO:0005875	GO:0009207	GO:0003774	GO:0007017	GO:0032559
Unigene11051_CmRNA	GO:0015837	GO:0015171	GO:0044464	GO:0044238
Unigene11053_CmRNA	GO:0004871	GO:0006464	GO:0004713	GO:0044464	GO:0007167	GO:0032559
Unigene11055_CmRNA	GO:0043170	GO:0008238
Unigene11058_CmRNA	GO:0005929	GO:0006928	GO:0010927	GO:0043229
Unigene11059_CmRNA	GO:0035091	GO:0044464	GO:0016740
Unigene1105_CmRNA	GO:0007166	GO:0016020
Unigene11061_CmRNA	GO:0043231	GO:0005488
Unigene11063_CmRNA	GO:0015630	GO:0003676	GO:0032561
Unigene11065_CmRNA	GO:0002165	GO:0007635	GO:0000989	GO:0003002	GO:0043231	GO:0046914	GO:0050793	GO:0001071	GO:0003677	GO:0004879	GO:0009755	GO:0035108	GO:0006351	GO:0048102
Unigene11066_CmRNA	GO:0006259	GO:0046914	GO:0003676
Unigene11068_CmRNA	GO:0005681
Unigene11071_CmRNA	GO:0044464	GO:0015075	GO:0005488	GO:0006811
Unigene11073_CmRNA	GO:0016803	GO:0006950	GO:0043231	GO:0004601	GO:0042221	GO:0008152	GO:0044425
Unigene11074_CmRNA	GO:0050896
Unigene11075_CmRNA	GO:0019318	GO:0048037	GO:0016857
Unigene11076_CmRNA	GO:0005198
Unigene11079_CmRNA	GO:0016491
Unigene11081_CmRNA	GO:0046872	GO:0006811
Unigene11084_CmRNA	GO:0031224	GO:0071702
Unigene11085_CmRNA	GO:0006606	GO:0046914	GO:0003676	GO:0005515	GO:0043231	GO:0030529	GO:0006396
Unigene1109_CmRNA	GO:0017111	GO:0000166	GO:0005215	GO:0016020
Unigene1111_CmRNA	GO:0016859	GO:0003676	GO:0043231	GO:0044267	GO:0030529	GO:0006396
Unigene1112_CmRNA	GO:0019538	GO:0046914	GO:0006691	GO:0070011
Unigene1139_CmRNA	GO:0003824
Unigene1146_CmRNA	GO:0044464
Unigene1151_CmRNA	GO:0009987	GO:0005739	GO:0005515
Unigene1152_CmRNA	GO:0044464
Unigene1159_CmRNA	GO:0051536	GO:0016836
Unigene1169_CmRNA	GO:0016874
Unigene1172_CmRNA	GO:0065008	GO:0048869	GO:0043234	GO:0006909	GO:0030030	GO:0007423	GO:0006935	GO:0030036	GO:0050794	GO:0044424
Unigene1173_CmRNA	GO:0000278	GO:0016887	GO:0005515	GO:0044267	GO:0032559	GO:0015630
Unigene1174_CmRNA	GO:0006412	GO:0070011	GO:0016741	GO:0046914	GO:0005667	GO:0006352	GO:0006730	GO:0008135	GO:0003702
Unigene1175_CmRNA	GO:0016615	GO:0005488	GO:0055114	GO:0043648	GO:0044262	GO:0070013	GO:0006732	GO:0044429	GO:0016020	GO:0005634
Unigene1179_CmRNA	GO:0048638	GO:0032991	GO:0016020
Unigene1182_CmRNA	GO:0006351	GO:0030528	GO:0009124	GO:0046578	GO:0014706	GO:0051647	GO:0005083	GO:0048870	GO:0008092	GO:0030036	GO:0031674	GO:0005856	GO:0003723	GO:0016829	GO:0012505	GO:0007300	GO:0005887	GO:0035556
Unigene1183_CmRNA	GO:0005783	GO:0002118
Unigene1191_CmRNA	GO:0019538	GO:0004175
Unigene1204_CmRNA	GO:0009987	GO:0050896	GO:0050789	GO:0002376
Unigene1206_CmRNA	GO:0043169	GO:0016740
Unigene1208_CmRNA	GO:0015988	GO:0015077	GO:0033176	GO:0003824
Unigene1212_CmRNA	GO:0010257	GO:0007005	GO:0051536	GO:0043231	GO:0000166
Unigene1220_CmRNA	GO:0009987
Unigene1226_CmRNA	GO:0044424	GO:0005488
Unigene1229_CmRNA	GO:0005783
Unigene1231_CmRNA	GO:0006875	GO:0005506	GO:0000041
Unigene1232_CmRNA	GO:0046872
Unigene1235_CmRNA	GO:0004448	GO:0046872	GO:0000166	GO:0009060
Unigene1239_CmRNA	GO:0003676	GO:0043170	GO:0044238
Unigene1249_CmRNA	GO:0043231
Unigene1250_CmRNA	GO:0005488	GO:0016740	GO:0006040
Unigene1257_CmRNA	GO:0006909
Unigene12587_CmRNA	GO:0016772	GO:0044464	GO:0006644
Unigene12589_CmRNA	GO:0003824	GO:0008152
Unigene12592_CmRNA	GO:0006412	GO:0043231	GO:0022402	GO:0000339	GO:0031332	GO:0008135	GO:0044444	GO:0034518	GO:0007346
Unigene12594_CmRNA	GO:0046914	GO:0043231
Unigene12596_CmRNA	GO:0007186	GO:0016020
Unigene1259_CmRNA	GO:0019318	GO:0048037	GO:0016857
Unigene12601_CmRNA	GO:0007050	GO:0007548	GO:0040007	GO:0048513	GO:0009790
Unigene12603_CmRNA	GO:0046873	GO:0070838
Unigene12610_CmRNA	GO:0006909	GO:0046914	GO:0006396
Unigene12611_CmRNA	GO:0005887	GO:0004871	GO:0007166
Unigene12613_CmRNA	GO:0003824
Unigene12614_CmRNA	GO:0005488	GO:0051234
Unigene12621_CmRNA	GO:0004672	GO:0006464	GO:0032559
Unigene12627_CmRNA	GO:0046914	GO:0032446	GO:0019787
Unigene12631_CmRNA	GO:0016747
Unigene12635_CmRNA	GO:0004518	GO:0006399
Unigene12637_CmRNA	GO:0006259	GO:0007005	GO:0043566	GO:0043231	GO:0000229
Unigene12642_CmRNA	GO:0004672	GO:0044424
Unigene12643_CmRNA	GO:0016740
Unigene12646_CmRNA	GO:0010467	GO:0016876	GO:0032991	GO:0032559
Unigene12647_CmRNA	GO:0015031	GO:0044464	GO:0005515
Unigene12650_CmRNA	GO:0006810	GO:0035556	GO:0043231	GO:0000070	GO:0042551	GO:0000775	GO:0005700	GO:0032561	GO:0000793	GO:0010467
Unigene12653_CmRNA	GO:0032943	GO:0043169	GO:0009168	GO:0044444	GO:0016616
Unigene12655_CmRNA	GO:0010467	GO:0016740	GO:0016070
Unigene12657_CmRNA	GO:0044464	GO:0007165	GO:0008092	GO:0008289	GO:0004673
Unigene12659_CmRNA	GO:0031224
Unigene12660_CmRNA	GO:0000315	GO:0010467	GO:0005198
Unigene12663_CmRNA	GO:0050794
Unigene12665_CmRNA	GO:0009207	GO:0019829	GO:0051234	GO:0016020	GO:0032559
Unigene12670_CmRNA	GO:0003002	GO:0006403	GO:0003729	GO:0000578	GO:0043231	GO:0000087
Unigene12671_CmRNA	GO:0006351	GO:0003677	GO:0001071	GO:0043231
Unigene12672_CmRNA	GO:0070161	GO:0035556	GO:0004620	GO:0051235	GO:0032501	GO:0032561	GO:0033674
Unigene12674_CmRNA	GO:0044444
Unigene12678_CmRNA	GO:0031224
Unigene12681_CmRNA	GO:0005488
Unigene12683_CmRNA	GO:0006351	GO:0006464	GO:0004672	GO:0032559
Unigene12684_CmRNA	GO:0070011
Unigene12687_CmRNA	GO:0003824
Unigene12689_CmRNA	GO:0043231	GO:0006259
Unigene12690_CmRNA	GO:0015075	GO:0006464	GO:0035251	GO:0044464	GO:0006811
Unigene12694_CmRNA	GO:0044424	GO:0019538	GO:0008238
Unigene12695_CmRNA	GO:0005488
Unigene12698_CmRNA	GO:0016020
Unigene12699_CmRNA	GO:0016740
Unigene12702_CmRNA	GO:0043234	GO:0005488	GO:0016881	GO:0033554	GO:0006749	GO:0043231	GO:0044444
Unigene12704_CmRNA	GO:0016787	GO:0008152	GO:0046914
Unigene12705_CmRNA	GO:0044267	GO:0044424	GO:0050896	GO:0005515	GO:0032559
Unigene12707_CmRNA	GO:0001071	GO:0003702	GO:0061061	GO:0009888
Unigene1270_CmRNA	GO:0044238
Unigene12716_CmRNA	GO:0004866
Unigene12718_CmRNA	GO:0017111	GO:0035556	GO:0004620	GO:0009207	GO:0032561	GO:0044464
Unigene12720_CmRNA	GO:0008233
Unigene12724_CmRNA	GO:0006810	GO:0044464
Unigene12726_CmRNA	GO:0004871	GO:0007292	GO:0031224	GO:0048232
Unigene12728_CmRNA	GO:0006810
Unigene12734_CmRNA	GO:0016646	GO:0019842	GO:0022892	GO:0009256	GO:0043231	GO:0006730	GO:0016741
Unigene12735_CmRNA	GO:0016861	GO:0006041	GO:0044424
Unigene12739_CmRNA	GO:0008152	GO:0003824
Unigene12742_CmRNA	GO:0015698	GO:0015108	GO:0031224	GO:0015291	GO:0030001
Unigene12745_CmRNA	GO:0005099	GO:0044464	GO:0032318
Unigene12747_CmRNA	GO:0031410	GO:0016790
Unigene1275_CmRNA	GO:0008233
Unigene12760_CmRNA	GO:0006259	GO:0003676	GO:0003824
Unigene12761_CmRNA	GO:0030529
Unigene12765_CmRNA	GO:0003824
Unigene12766_CmRNA	GO:0044424
Unigene12770_CmRNA	GO:0016817
Unigene12771_CmRNA	GO:0031981	GO:0017111	GO:0072542	GO:0000267	GO:0008287	GO:0046983	GO:0009207	GO:0042802	GO:0032559	GO:0006915	GO:0034703	GO:0019903	GO:0016859	GO:0010923	GO:0006470	GO:0010922
Unigene12774_CmRNA	GO:0005859	GO:0032989	GO:0032501	GO:0003774	GO:0003779	GO:0048468	GO:0007610	GO:0071842
Unigene12777_CmRNA	GO:0046872	GO:0019538	GO:0070011	GO:0044429
Unigene12780_CmRNA	GO:0051641	GO:0043473	GO:0043231	GO:0044444
Unigene12782_CmRNA	GO:0044238	GO:0003824
Unigene12787_CmRNA	GO:0008104	GO:0008306	GO:0005488	GO:0016020
Unigene1278_CmRNA	GO:0003676	GO:0034061	GO:0004518	GO:0006260
Unigene12792_CmRNA	GO:0005515	GO:0044267	GO:0050794	GO:0003824
Unigene12793_CmRNA	GO:0051536	GO:0005746	GO:0022904	GO:0016301	GO:0050136	GO:0032559	GO:0006464
Unigene12795_CmRNA	GO:0000166	GO:0043231	GO:0018130	GO:0007088	GO:0006915	GO:0009201	GO:0016049	GO:0048523	GO:0009132	GO:0016776
Unigene12797_CmRNA	GO:0008152
Unigene12800_CmRNA	GO:0070646	GO:0016790	GO:0015630
Unigene12802_CmRNA	GO:0005249	GO:0050804	GO:0007626	GO:0042391	GO:0034220	GO:0030001	GO:0005887
Unigene12810_CmRNA	GO:0070011
Unigene12811_CmRNA	GO:0016740
Unigene12812_CmRNA	GO:0003824
Unigene12817_CmRNA	GO:0006560	GO:0016646
Unigene1281_CmRNA	GO:0005856
Unigene12828_CmRNA	GO:0060089	GO:0046872	GO:0006351	GO:0001071	GO:0043231	GO:0023052
Unigene12829_CmRNA	GO:0007635	GO:0043231	GO:0000912	GO:0003676	GO:0007450	GO:0032535	GO:0001071	GO:0006869	GO:0033043	GO:0007365	GO:0010467	GO:0001751
Unigene12830_CmRNA	GO:0005488	GO:0005622
Unigene12832_CmRNA	GO:0016787
Unigene12833_CmRNA	GO:0046914	GO:0003676	GO:0006020	GO:0010467	GO:0016701	GO:0044424
Unigene12835_CmRNA	GO:0031224	GO:0046872	GO:0009206	GO:0005548	GO:0006869	GO:0019829	GO:0032559
Unigene12840_CmRNA	GO:0000377	GO:0006351	GO:0003676	GO:0001071	GO:0005681	GO:0031012
Unigene12843_CmRNA	GO:0001654	GO:0003002	GO:0016055	GO:0007476	GO:0001738	GO:0009629	GO:0032559	GO:0004702	GO:0006464
Unigene12844_CmRNA	GO:0016740
Unigene12845_CmRNA	GO:0006886	GO:0005634
Unigene12846_CmRNA	GO:0003676	GO:0043170	GO:0044238	GO:0003824
Unigene12855_CmRNA	GO:0060089	GO:0023052
Unigene12857_CmRNA	GO:0018904	GO:0015036	GO:0019725
Unigene1285_CmRNA	GO:0009987
Unigene12861_CmRNA	GO:0019538	GO:0004175	GO:0043169
Unigene12866_CmRNA	GO:0006915	GO:0051716	GO:0023052	GO:0048519	GO:0046872	GO:0044260	GO:0050877	GO:0022414	GO:0065009	GO:0080090	GO:0006801	GO:0006873	GO:0000302	GO:0050794	GO:0071842	GO:0008015	GO:0043229	GO:0051239	GO:0044444	GO:0034641	GO:0048731	GO:0005576
Unigene12868_CmRNA	GO:0005488
Unigene12872_CmRNA	GO:0009987	GO:0005488	GO:0004872
Unigene12873_CmRNA	GO:0004812	GO:0006418	GO:0032559	GO:0044424
Unigene12874_CmRNA	GO:0046872
Unigene12875_CmRNA	GO:0043234	GO:0019941	GO:0004842	GO:0032446
Unigene12878_CmRNA	GO:0030528	GO:0043231	GO:0006355
Unigene12879_CmRNA	GO:0016740
Unigene12885_CmRNA	GO:0034062	GO:0006351	GO:0046914	GO:0003676	GO:0001071
Unigene12886_CmRNA	GO:0016787	GO:0005488
Unigene12889_CmRNA	GO:0007472	GO:0007169	GO:0002682	GO:0022402	GO:0009207	GO:0035264	GO:0046669	GO:0032561	GO:0061245	GO:0060446	GO:0006605	GO:0017111	GO:0043066	GO:0001700	GO:0045666	GO:0000578	GO:0007297	GO:0045165	GO:0008283	GO:0035556	GO:0002164	GO:0003002	GO:0048598	GO:0016020	GO:0042065
Unigene12898_CmRNA	GO:0006935	GO:0007631	GO:0005488	GO:0008039	GO:0035272	GO:0016020
Unigene1289_CmRNA	GO:0005924	GO:0007059	GO:0000793	GO:0006996	GO:0032559
Unigene12903_CmRNA	GO:0000278	GO:0031967	GO:0006997	GO:0005882
Unigene12904_CmRNA	GO:0015820	GO:0031224	GO:0005275
Unigene12905_CmRNA	GO:0016779	GO:0005739	GO:0034645	GO:0090304	GO:0007005
Unigene12912_CmRNA	GO:0030529
Unigene12914_CmRNA	GO:0006810
Unigene12915_CmRNA	GO:0015075	GO:0016757	GO:0004871	GO:0016628	GO:0044464	GO:0006811	GO:0009987	GO:0008152
Unigene12922_CmRNA	GO:0044444	GO:0003824
Unigene12923_CmRNA	GO:0006909
Unigene12925_CmRNA	GO:0035556	GO:0032561	GO:0006810	GO:0017111
Unigene12931_CmRNA	GO:0005488	GO:0044424
Unigene12932_CmRNA	GO:0044267	GO:0043234	GO:0005515
Unigene12933_CmRNA	GO:0009987	GO:0048856	GO:0007275
Unigene12934_CmRNA	GO:0005488
Unigene12940_CmRNA	GO:0005488
Unigene12942_CmRNA	GO:0044444
Unigene12943_CmRNA	GO:0003676	GO:0046914
Unigene12946_CmRNA	GO:0000377	GO:0005681	GO:0051536	GO:0030532
Unigene12949_CmRNA	GO:0005488	GO:0043231
Unigene12953_CmRNA	GO:0007423	GO:0005506	GO:0043231
Unigene12955_CmRNA	GO:0009207	GO:0032561	GO:0017111
Unigene12957_CmRNA	GO:0005488	GO:0016874
Unigene12963_CmRNA	GO:0016741	GO:0046914	GO:0003676	GO:0006730	GO:0043231
Unigene12968_CmRNA	GO:0030528	GO:0016055	GO:0043231	GO:0007472	GO:0046914	GO:0006342	GO:0007346
Unigene12969_CmRNA	GO:0009060	GO:0046872	GO:0043231	GO:0004448	GO:0000166	GO:0015630
Unigene12975_CmRNA	GO:0060541	GO:0004190	GO:0043231	GO:0031224	GO:0006508
Unigene12981_CmRNA	GO:0000278	GO:0015630	GO:0044267	GO:0006909	GO:0005743	GO:0015662	GO:0005515	GO:0032559
Unigene12982_CmRNA	GO:0031224
Unigene12985_CmRNA	GO:0043231	GO:0046914	GO:0008289	GO:0001071	GO:0003677	GO:0004879	GO:0009755	GO:0006351
Unigene12986_CmRNA	GO:0000377	GO:0005681
Unigene12987_CmRNA	GO:0016571	GO:0046914	GO:0003676	GO:0016279	GO:0043231
Unigene12988_CmRNA	GO:0043231	GO:0003676	GO:0000060	GO:0046914	GO:0033554	GO:0030518	GO:0030177	GO:0019941	GO:0004842	GO:0035411	GO:0016567
Unigene12992_CmRNA	GO:0009987	GO:0048731	GO:0048598	GO:0048729
Unigene1299_CmRNA	GO:0009062	GO:0050662	GO:0042579	GO:0016634
Unigene13004_CmRNA	GO:0044464	GO:0046914
Unigene13013_CmRNA	GO:0003824	GO:0008152
Unigene13014_CmRNA	GO:0016755	GO:0019538	GO:0016787	GO:0043231
Unigene13015_CmRNA	GO:0016020	GO:0021782
Unigene13019_CmRNA	GO:0006405	GO:0005488	GO:0043231
Unigene13029_CmRNA	GO:0012501	GO:0019538	GO:0004175
Unigene13030_CmRNA	GO:0006364	GO:0031981
Unigene13033_CmRNA	GO:0017182	GO:0006909	GO:0043231
Unigene13039_CmRNA	GO:0007292	GO:0008152	GO:0044464	GO:0071842
Unigene13041_CmRNA	GO:0019866	GO:0022892	GO:0006810	GO:0031224
Unigene13043_CmRNA	GO:0016773	GO:0044237
Unigene13048_CmRNA	GO:0005488
Unigene13050_CmRNA	GO:0016251	GO:0043234	GO:0043231	GO:0006355
Unigene13052_CmRNA	GO:0016491	GO:0008152
Unigene13055_CmRNA	GO:0006546	GO:0048037	GO:0016642
Unigene13060_CmRNA	GO:0016787	GO:0008152	GO:0005488	GO:0044464
Unigene13063_CmRNA	GO:0016020	GO:0006810
Unigene13069_CmRNA	GO:0019866	GO:0043231	GO:0008746
Unigene13070_CmRNA	GO:0004553	GO:0006022	GO:0005488
Unigene13073_CmRNA	GO:0043231	GO:0043234	GO:0006355	GO:0016251	GO:0023052	GO:0005515
Unigene13076_CmRNA	GO:0048037
Unigene13077_CmRNA	GO:0000152	GO:0007088
Unigene13078_CmRNA	GO:0034062	GO:0044451	GO:0006351	GO:0031016	GO:0003676	GO:0001882
Unigene13079_CmRNA	GO:0005488
Unigene13082_CmRNA	GO:0033554
Unigene13089_CmRNA	GO:0006730	GO:0006364	GO:0008173	GO:0005634
Unigene1308_CmRNA	GO:0051707
Unigene13090_CmRNA	GO:0030832	GO:0051017	GO:0004672	GO:0051276	GO:0008306	GO:0007420	GO:0006468	GO:0001700	GO:0032559	GO:0045171	GO:0007431	GO:0007300	GO:0007293	GO:0000165
Unigene13091_CmRNA	GO:0003676	GO:0030529	GO:0044428
Unigene13092_CmRNA	GO:0008092	GO:0044425	GO:0043232
Unigene13093_CmRNA	GO:0005488	GO:0043232
Unigene13097_CmRNA	GO:0050896	GO:0031224	GO:0004872
Unigene13101_CmRNA	GO:0009605
Unigene13103_CmRNA	GO:0009987	GO:0007276	GO:0006810	GO:0016887	GO:0006950
Unigene13109_CmRNA	GO:0006259	GO:0007005	GO:0043566	GO:0043231	GO:0000229
Unigene1310_CmRNA	GO:0017111	GO:0005488	GO:0016903	GO:0008152
Unigene13111_CmRNA	GO:0043231	GO:0015630	GO:0006259	GO:0003677	GO:0016462	GO:0005657	GO:0032559
Unigene13114_CmRNA	GO:0044424
Unigene13116_CmRNA	GO:0019752	GO:0004312	GO:0005488	GO:0043231	GO:0016788	GO:0006766	GO:0044444	GO:0044255
Unigene13117_CmRNA	GO:0005488	GO:0051234
Unigene13118_CmRNA	GO:0005515	GO:0009987	GO:0008152
Unigene13120_CmRNA	GO:0005488
Unigene13123_CmRNA	GO:0017111	GO:0046872	GO:0006811	GO:0016791	GO:0009207	GO:0032561	GO:0015075
Unigene13127_CmRNA	GO:0006631	GO:0015645
Unigene13129_CmRNA	GO:0006818	GO:0006909	GO:0044444	GO:0015075
Unigene13136_CmRNA	GO:0006351	GO:0030528	GO:0014706	GO:0051647	GO:0048870	GO:0008092	GO:0030036	GO:0031674	GO:0005856	GO:0007165	GO:0003723	GO:0012505	GO:0003824	GO:0007300	GO:0005887	GO:0009117
Unigene13137_CmRNA	GO:0050896
Unigene13138_CmRNA	GO:0016788
Unigene13139_CmRNA	GO:0050658	GO:0016471	GO:0015662	GO:0010259	GO:0019829	GO:0015988
Unigene13143_CmRNA	GO:0006996	GO:0043234	GO:0043232	GO:0004812	GO:0006418	GO:0032559
Unigene13145_CmRNA	GO:0043231	GO:0019884	GO:0046638	GO:0016044	GO:0034613	GO:0044444	GO:0015031
Unigene13148_CmRNA	GO:0004812	GO:0003723	GO:0006418	GO:0032559	GO:0044424
Unigene1314_CmRNA	GO:0046914	GO:0043412	GO:0007017	GO:0003774	GO:0032559	GO:0015630
Unigene13150_CmRNA	GO:0000288	GO:0005488	GO:0010467	GO:0044444
Unigene1315_CmRNA	GO:0051346	GO:0004866
Unigene13160_CmRNA	GO:0008152	GO:0016491	GO:0005506
Unigene13161_CmRNA	GO:0005488	GO:0016055
Unigene13162_CmRNA	GO:0006560	GO:0016646	GO:0044429
Unigene13176_CmRNA	GO:0005488
Unigene13178_CmRNA	GO:0005488
Unigene13181_CmRNA	GO:0006810	GO:0016021	GO:0005326	GO:0015291	GO:0080134	GO:0007154	GO:0004888	GO:0042065
Unigene13182_CmRNA	GO:0031224
Unigene13183_CmRNA	GO:0004672	GO:0044444	GO:0007165	GO:0032559	GO:0006464
Unigene13187_CmRNA	GO:0016879	GO:0009081	GO:0032559	GO:0044429
Unigene13188_CmRNA	GO:0007186	GO:0005102
Unigene13190_CmRNA	GO:0031981
Unigene13191_CmRNA	GO:0016020
Unigene13192_CmRNA	GO:0004812	GO:0006418	GO:0032559	GO:0015630
Unigene13193_CmRNA	GO:0048102	GO:0006950	GO:0016021	GO:0004888
Unigene13195_CmRNA	GO:0043234	GO:0005515	GO:0000166	GO:0006351
Unigene13197_CmRNA	GO:0015988	GO:0015077	GO:0033176	GO:0003824
Unigene13198_CmRNA	GO:0016740
Unigene1319_CmRNA	GO:0016787
Unigene13206_CmRNA	GO:0006164	GO:0009975	GO:0005506
Unigene13210_CmRNA	GO:0016462
Unigene13219_CmRNA	GO:0009888
Unigene13228_CmRNA	GO:0004812	GO:0006418	GO:0000166
Unigene13231_CmRNA	GO:0031224	GO:0043169	GO:0009206	GO:0019829	GO:0070838	GO:0005789	GO:0032559
Unigene13232_CmRNA	GO:0044464	GO:0046914	GO:0000087
Unigene13234_CmRNA	GO:0005488	GO:0003824
Unigene13236_CmRNA	GO:0051018	GO:0043231	GO:0032147	GO:0001894	GO:0001756
Unigene13238_CmRNA	GO:0008306	GO:0016810
Unigene13239_CmRNA	GO:0008415	GO:0008152
Unigene13240_CmRNA	GO:0003676	GO:0043170	GO:0044238
Unigene13243_CmRNA	GO:0043231	GO:0007269	GO:0016198	GO:0007019	GO:0015631	GO:0008582	GO:0043232	GO:0044459	GO:0044444	GO:0007293	GO:0045202
Unigene13244_CmRNA	GO:0043967	GO:0007166	GO:0046914	GO:0010484	GO:0007626	GO:0005515	GO:0006357	GO:0043231	GO:0001752	GO:0048534	GO:0007067	GO:0003713	GO:0043234	GO:0043966	GO:0001505	GO:0007623
Unigene13251_CmRNA	GO:0032531	GO:0044459	GO:0042995	GO:0007448	GO:0030703	GO:0007166
Unigene13256_CmRNA	GO:0006351	GO:0003677
Unigene13262_CmRNA	GO:0016787
Unigene13264_CmRNA	GO:0003676	GO:0043170	GO:0044238
Unigene13266_CmRNA	GO:0006357	GO:0043231	GO:0031641	GO:0010624	GO:0043565
Unigene13269_CmRNA	GO:0003676	GO:0005622
Unigene1326_CmRNA	GO:0003824
Unigene13271_CmRNA	GO:0007166	GO:0005700	GO:0006357	GO:0003712	GO:0051301	GO:0019827	GO:0016604	GO:0001654	GO:0001709	GO:0007476
Unigene13272_CmRNA	GO:0009207	GO:0017111	GO:0032559
Unigene13273_CmRNA	GO:0016491
Unigene13275_CmRNA	GO:0046914	GO:0019941	GO:0008238	GO:0016790
Unigene13276_CmRNA	GO:0051234	GO:0031224
Unigene13280_CmRNA	GO:0008152	GO:0016787	GO:0005488	GO:0043231
Unigene13286_CmRNA	GO:0016772
Unigene13287_CmRNA	GO:0044464	GO:0008324	GO:0006812
Unigene13288_CmRNA	GO:0050658	GO:0016471	GO:0015662	GO:0010259	GO:0019829	GO:0015988
Unigene13301_CmRNA	GO:0072379	GO:0045048
Unigene13302_CmRNA	GO:0008375
Unigene13303_CmRNA	GO:0000785	GO:0003676	GO:0034728	GO:0043231
Unigene13304_CmRNA	GO:0016787
Unigene13312_CmRNA	GO:0051234
Unigene13315_CmRNA	GO:0005488
Unigene13321_CmRNA	GO:0016740
Unigene13323_CmRNA	GO:0016740
Unigene13325_CmRNA	GO:0005681	GO:0044267	GO:0016859
Unigene13326_CmRNA	GO:0004866
Unigene13328_CmRNA	GO:0030247	GO:0006022
Unigene13334_CmRNA	GO:0070646	GO:0019783	GO:0006915
Unigene13339_CmRNA	GO:0030247	GO:0016787	GO:0006022
Unigene13343_CmRNA	GO:0005515	GO:0016020	GO:0071842	GO:0048856	GO:0007165
Unigene13350_CmRNA	GO:0046872	GO:0016812
Unigene13351_CmRNA	GO:0009894	GO:0043234
Unigene13354_CmRNA	GO:0005488	GO:0044238	GO:0044260
Unigene13357_CmRNA	GO:0046872	GO:0005622
Unigene13365_CmRNA	GO:0046914	GO:0019538	GO:0004175
Unigene13369_CmRNA	GO:0006351	GO:0003677	GO:0001071	GO:0043231
Unigene13371_CmRNA	GO:0000278	GO:0007017	GO:0005815	GO:0043231	GO:0016055	GO:0007143	GO:0045165	GO:0045185	GO:0000912	GO:0032559	GO:0003774	GO:0005875	GO:0007399	GO:0042993
Unigene13372_CmRNA	GO:0046872	GO:0003676
Unigene13374_CmRNA	GO:0043231	GO:0018065	GO:0022904
Unigene13376_CmRNA	GO:0003007	GO:0048729	GO:0043231	GO:0001667	GO:0001568	GO:0006355	GO:0048534	GO:0048732	GO:0001071	GO:0042802	GO:0003677	GO:0042471	GO:0035239
Unigene13380_CmRNA	GO:0006351	GO:0003677	GO:0001071	GO:0005515	GO:0043231
Unigene13381_CmRNA	GO:0009987	GO:0016787
Unigene13383_CmRNA	GO:0008219	GO:0003006
Unigene13384_CmRNA	GO:0003676
Unigene13387_CmRNA	GO:0043231	GO:0044444
Unigene13389_CmRNA	GO:0007166	GO:0004871	GO:0005515	GO:0007424	GO:0007409	GO:0016337	GO:0048870	GO:0007439	GO:0010669	GO:0031589	GO:0006935	GO:0007431	GO:0005887	GO:0007472	GO:0007606
Unigene13391_CmRNA	GO:0016740
Unigene13392_CmRNA	GO:0009207	GO:0019829	GO:0051234	GO:0044464	GO:0032559
Unigene13394_CmRNA	GO:0009987
Unigene13397_CmRNA	GO:0032991	GO:0005488	GO:0006396	GO:0043231
Unigene13401_CmRNA	GO:0003824
Unigene13405_CmRNA	GO:0046872
Unigene13409_CmRNA	GO:0006351	GO:0001071	GO:0043231
Unigene1340_CmRNA	GO:0005488	GO:0006810	GO:0043231	GO:0044444
Unigene13410_CmRNA	GO:0009062	GO:0050662	GO:0042579	GO:0016634
Unigene13413_CmRNA	GO:0005488	GO:0008152	GO:0003824
Unigene13415_CmRNA	GO:0006351	GO:0043231	GO:0033500	GO:0051707	GO:0006073	GO:0009968	GO:0008283	GO:0001071	GO:0010259	GO:0031669	GO:0007169	GO:0048592	GO:0006629	GO:0003677	GO:0048869	GO:0016049	GO:0033554	GO:0035264	GO:0006979	GO:0010506
Unigene13417_CmRNA	GO:0016491	GO:0008152
Unigene13418_CmRNA	GO:0003002	GO:0046872	GO:0019538	GO:0070011
Unigene13424_CmRNA	GO:0006810	GO:0015291	GO:0016021
Unigene13425_CmRNA	GO:0000315	GO:0043231	GO:0005198
Unigene13433_CmRNA	GO:0009987	GO:0004672	GO:0000166
Unigene13434_CmRNA	GO:0006730	GO:0044464	GO:0006364	GO:0008168
Unigene13436_CmRNA	GO:0031224	GO:0017111	GO:0006810	GO:0009207	GO:0015405	GO:0032559
Unigene13437_CmRNA	GO:0003676	GO:0044464	GO:0046914
Unigene13439_CmRNA	GO:0017111	GO:0015629	GO:0032559
Unigene13441_CmRNA	GO:0009987	GO:0003676
Unigene13442_CmRNA	GO:0004871	GO:0008320	GO:0031966	GO:0015031
Unigene13443_CmRNA	GO:0016743	GO:0009064	GO:0031406	GO:0006220	GO:0016879	GO:0016810	GO:0019856	GO:0032559
Unigene13445_CmRNA	GO:0044459	GO:0030313	GO:0008066	GO:0006810	GO:0031224	GO:0005231
Unigene13447_CmRNA	GO:0016747	GO:0006464	GO:0043231	GO:0016755
Unigene13448_CmRNA	GO:0006260	GO:0046914	GO:0003676	GO:0004518	GO:0044464	GO:0034061
Unigene13449_CmRNA	GO:0003824
Unigene13453_CmRNA	GO:0051657	GO:0007599	GO:0019829	GO:0051560	GO:0090075	GO:0005789	GO:0032469	GO:0031672	GO:0009207	GO:0046872	GO:0042802	GO:0032559	GO:0031443	GO:0006915	GO:0034703	GO:0033554	GO:0001775	GO:0070588	GO:0042598	GO:0009206	GO:0006942
Unigene13458_CmRNA	GO:0016788	GO:0003676	GO:0044260
Unigene13459_CmRNA	GO:0045926	GO:0035556	GO:0005488	GO:0006915	GO:0022402	GO:0005913	GO:0001745	GO:0043232	GO:0045570	GO:0016310	GO:0016197	GO:0007178	GO:0008283	GO:0007346
Unigene13461_CmRNA	GO:0019941	GO:0000151	GO:0019899
Unigene13462_CmRNA	GO:0000175	GO:0006464	GO:0016301	GO:0032559
Unigene13463_CmRNA	GO:0005488	GO:0016301
Unigene13465_CmRNA	GO:0070011
Unigene13475_CmRNA	GO:0004674	GO:0006464	GO:0032559
Unigene13476_CmRNA	GO:0016709	GO:0044271	GO:0005506	GO:0005515	GO:0050662	GO:0000166
Unigene13483_CmRNA	GO:0046872	GO:0031224	GO:0016337
Unigene13484_CmRNA	GO:0031224	GO:0009206	GO:0006811	GO:0009207	GO:0019829	GO:0032559
Unigene13485_CmRNA	GO:0016787
Unigene13489_CmRNA	GO:0046914	GO:0006308	GO:0031981	GO:0008409
Unigene13490_CmRNA	GO:0006351	GO:0046914	GO:0003677	GO:0001071	GO:0044464
Unigene13494_CmRNA	GO:0007635	GO:0006024	GO:0002118	GO:0007420	GO:0016616	GO:0007169	GO:0015012	GO:0000166	GO:0060446	GO:0001707
Unigene13504_CmRNA	GO:0016740
Unigene13507_CmRNA	GO:0044267	GO:0016859	GO:0009790
Unigene13511_CmRNA	GO:0007049
Unigene13513_CmRNA	GO:0046872	GO:0006810	GO:0015291	GO:0016021
Unigene13514_CmRNA	GO:0042461	GO:0006351	GO:0046914	GO:0007450	GO:0009880	GO:0043231	GO:0043409	GO:0007424	GO:0007320	GO:0001071	GO:0001736	GO:0007169	GO:0010669	GO:0001700	GO:0001654	GO:0035028
Unigene13523_CmRNA	GO:0016798
Unigene13524_CmRNA	GO:0044464	GO:0046914
Unigene13527_CmRNA	GO:0042254	GO:0005634
Unigene13530_CmRNA	GO:0046914	GO:0006810	GO:0015291	GO:0016021	GO:0005326
Unigene13531_CmRNA	GO:0004620	GO:0031224	GO:0007165	GO:0016740	GO:0048037	GO:0044238
Unigene13533_CmRNA	GO:0030246
Unigene13536_CmRNA	GO:0046872	GO:0004871	GO:0031224	GO:0043231
Unigene13538_CmRNA	GO:0030176
Unigene13539_CmRNA	GO:0040009	GO:0031667	GO:0005740	GO:0005506	GO:0040011	GO:0050662	GO:0016670
Unigene13544_CmRNA	GO:0008233
Unigene13545_CmRNA	GO:0004527	GO:0004175	GO:0005488	GO:0034641	GO:0000502	GO:0006508
Unigene13549_CmRNA	GO:0006892	GO:0043231	GO:0003006	GO:0016197
Unigene1354_CmRNA	GO:0003676	GO:0002376	GO:0003824	GO:0032559
Unigene13556_CmRNA	GO:0031224	GO:0017111	GO:0031966	GO:0009207	GO:0006944	GO:0032561
Unigene13557_CmRNA	GO:0043231	GO:0007297	GO:0007423	GO:0009416	GO:0006935	GO:0033267	GO:0031982	GO:0001505	GO:0016197	GO:0006904
Unigene13560_CmRNA	GO:0005488
Unigene13564_CmRNA	GO:0016020
Unigene13565_CmRNA	GO:0008152	GO:0016903
Unigene13567_CmRNA	GO:0043231	GO:0003676	GO:0006259	GO:0006220	GO:0046914	GO:0009064	GO:0016879	GO:0032559
Unigene13568_CmRNA	GO:0004812	GO:0006418	GO:0000166
Unigene1356_CmRNA	GO:0008152	GO:0016787
Unigene13573_CmRNA	GO:0016859	GO:0000377	GO:0005488	GO:0005681	GO:0044267
Unigene13579_CmRNA	GO:0005088	GO:0007266	GO:0044464
Unigene1358_CmRNA	GO:0005905	GO:0012510	GO:0015031
Unigene1371_CmRNA	GO:0044238
Unigene1376_CmRNA	GO:0016251	GO:0043234	GO:0006355
Unigene1378_CmRNA	GO:0031032	GO:0009888	GO:0031674	GO:0005198
Unigene1379_CmRNA	GO:0044444	GO:0070011	GO:0015630
Unigene1381_CmRNA	GO:0016787
Unigene1382_CmRNA	GO:0044424
Unigene1398_CmRNA	GO:0043234	GO:0016192
Unigene1401_CmRNA	GO:0007588	GO:0007292	GO:0042335
Unigene1405_CmRNA	GO:0044452	GO:0016866	GO:0016872	GO:0006644	GO:0003723	GO:0006020
Unigene1410_CmRNA	GO:0006144	GO:0001654	GO:0006188	GO:0016882	GO:0016742	GO:0006730	GO:0044424	GO:0032559
Unigene1411_CmRNA	GO:0034641
Unigene1414_CmRNA	GO:0008092	GO:0044464
Unigene1418_CmRNA	GO:0009987
Unigene1427_CmRNA	GO:0008233
Unigene1432_CmRNA	GO:0046914	GO:0016627	GO:0050662	GO:0006399
Unigene1435_CmRNA	GO:0003676	GO:0003678	GO:0043231	GO:0042623	GO:0032559	GO:0006281
Unigene1444_CmRNA	GO:0008152	GO:0004553
Unigene1449_CmRNA	GO:0005488	GO:0000315	GO:0043231	GO:0010467	GO:0005198
Unigene1451_CmRNA	GO:0005488	GO:0016787
Unigene1454_CmRNA	GO:0016859	GO:0000377	GO:0005681	GO:0044267
Unigene14587_CmRNA	GO:0043231	GO:0003677
Unigene14589_CmRNA	GO:0016811	GO:0008283	GO:0018193	GO:0043231
Unigene14591_CmRNA	GO:0000315	GO:0005198
Unigene14593_CmRNA	GO:0000315
Unigene14595_CmRNA	GO:0044260	GO:0030528	GO:0019901	GO:0048518	GO:0003676	GO:0042345	GO:0007249	GO:0006915	GO:0044238
Unigene14598_CmRNA	GO:0043234	GO:0043648	GO:0016624	GO:0009060	GO:0019674	GO:0005515	GO:0044429
Unigene14599_CmRNA	GO:0005681
Unigene1459_CmRNA	GO:0016251	GO:0043234	GO:0043231	GO:0006355
Unigene14600_CmRNA	GO:0044238	GO:0007165	GO:0004620
Unigene14602_CmRNA	GO:0005488	GO:0008080	GO:0006351	GO:0048102	GO:0044424	GO:0032502
Unigene14603_CmRNA	GO:0003824
Unigene14606_CmRNA	GO:0016408	GO:0015645	GO:0035337	GO:0004497
Unigene14610_CmRNA	GO:0008175	GO:0005488	GO:0033554	GO:0001510	GO:0043231	GO:0044444
Unigene14612_CmRNA	GO:0007166	GO:0010259	GO:0031224	GO:0004888
Unigene14613_CmRNA	GO:0006810
Unigene14614_CmRNA	GO:0009987	GO:0032991	GO:0003676	GO:0031981	GO:0043232	GO:0005515
Unigene14615_CmRNA	GO:0043161	GO:0009894	GO:0051320	GO:0016070	GO:0051439	GO:0043234	GO:0006520	GO:0006915	GO:0030330	GO:0005488
Unigene14619_CmRNA	GO:0006464	GO:0004702	GO:0006796	GO:0032559
Unigene14620_CmRNA	GO:0004812	GO:0031224	GO:0006418	GO:0032559	GO:0044424
Unigene14621_CmRNA	GO:0006412	GO:0030528	GO:0008415	GO:0006355	GO:0008135	GO:0006368
Unigene14622_CmRNA	GO:0005975	GO:0016798
Unigene14623_CmRNA	GO:0022891	GO:0016491	GO:0005622	GO:0005886	GO:0006810	GO:0044425
Unigene14626_CmRNA	GO:0009987	GO:0005488	GO:0004879
Unigene14628_CmRNA	GO:0016740
Unigene14633_CmRNA	GO:0006909	GO:0016023	GO:0005515	GO:0031224
Unigene14637_CmRNA	GO:0005488
Unigene14638_CmRNA	GO:0004091
Unigene14639_CmRNA	GO:0019538	GO:0004175
Unigene14640_CmRNA	GO:0004683
Unigene14642_CmRNA	GO:0005488
Unigene14644_CmRNA	GO:0007265	GO:0005088	GO:0006935	GO:0042551	GO:0044444
Unigene14649_CmRNA	GO:0003676
Unigene14650_CmRNA	GO:0003676	GO:0043170	GO:0044238
Unigene14652_CmRNA	GO:0000377	GO:0030529
Unigene14653_CmRNA	GO:0004860	GO:0019900	GO:0031981	GO:0006469	GO:0051283
Unigene14658_CmRNA	GO:0009653	GO:0006355	GO:0007162	GO:0016021	GO:0046983	GO:0048513	GO:0007154	GO:0019904	GO:0035567	GO:0042802	GO:0030154	GO:0007399	GO:0043388	GO:0004888
Unigene1465_CmRNA	GO:0016614	GO:0044281	GO:0050662
Unigene14662_CmRNA	GO:0016787	GO:0004866
Unigene14663_CmRNA	GO:0044267	GO:0005527
Unigene14665_CmRNA	GO:0016741	GO:0032451	GO:0006730	GO:0005700
Unigene14667_CmRNA	GO:0017111	GO:0046872
Unigene14668_CmRNA	GO:0009207	GO:0032561	GO:0017111
Unigene14671_CmRNA	GO:0016491	GO:0008152	GO:0005506
Unigene14673_CmRNA	GO:0005488
Unigene14674_CmRNA	GO:0016859	GO:0044267
Unigene14680_CmRNA	GO:0006796	GO:0016772
Unigene14681_CmRNA	GO:0031224	GO:0006810	GO:0042623	GO:0009207	GO:0015405	GO:0032559
Unigene14684_CmRNA	GO:0016787	GO:0004866
Unigene14685_CmRNA	GO:0005198	GO:0006950
Unigene14692_CmRNA	GO:0044464	GO:0046914	GO:0032446	GO:0019787
Unigene14695_CmRNA	GO:0044238	GO:0007049	GO:0043170	GO:0005515	GO:0050794	GO:0008283	GO:0010033
Unigene14697_CmRNA	GO:0003824
Unigene14700_CmRNA	GO:0006298	GO:0000018	GO:0009314	GO:0032300	GO:0042981	GO:0007127	GO:0043231	GO:0032559	GO:0032138	GO:0005515	GO:0007050	GO:0016887	GO:0002204	GO:0010564	GO:0000217	GO:0051276
Unigene14701_CmRNA	GO:0005622	GO:0005488
Unigene14706_CmRNA	GO:0043436	GO:0048037	GO:0016832
Unigene14707_CmRNA	GO:0044267	GO:0050896	GO:0005515	GO:0032559
Unigene14708_CmRNA	GO:0005975	GO:0043169	GO:0015923
Unigene14711_CmRNA	GO:0031224	GO:0017111	GO:0006811	GO:0009207	GO:0015405	GO:0032559
Unigene14713_CmRNA	GO:0003002	GO:0006403	GO:0003729	GO:0000578	GO:0043231	GO:0000087
Unigene14715_CmRNA	GO:0019538	GO:0004175
Unigene14721_CmRNA	GO:0030119	GO:0006357	GO:0006901	GO:0048333	GO:0030130	GO:0007517	GO:0001708	GO:0015031	GO:0000981	GO:0022892	GO:0003677	GO:0048565	GO:0001505
Unigene14724_CmRNA	GO:0007297	GO:0016192
Unigene14730_CmRNA	GO:0006144	GO:0043169	GO:0006188	GO:0016882	GO:0016742	GO:0006730	GO:0044424	GO:0032559
Unigene14731_CmRNA	GO:0006950
Unigene1473_CmRNA	GO:0010970	GO:0005488	GO:0044444	GO:0019915	GO:0044238	GO:0015630	GO:0032879
Unigene14740_CmRNA	GO:0046914
Unigene14741_CmRNA	GO:0046872	GO:0044464
Unigene14743_CmRNA	GO:0005179
Unigene14744_CmRNA	GO:0003676	GO:0043170	GO:0006139	GO:0016787
Unigene14747_CmRNA	GO:0034061	GO:0003677	GO:0006259
Unigene14748_CmRNA	GO:0000166
Unigene14750_CmRNA	GO:0003824
Unigene14752_CmRNA	GO:0016651	GO:0022904	GO:0005746
Unigene14755_CmRNA	GO:0030529
Unigene14758_CmRNA	GO:0005815	GO:0048592	GO:0070161	GO:0034331
Unigene14763_CmRNA	GO:0016055	GO:0005488	GO:0043231	GO:0043234	GO:0006355	GO:0016251
Unigene14764_CmRNA	GO:0055067	GO:0003676	GO:0005451	GO:0031224	GO:0030001
Unigene14766_CmRNA	GO:0015988	GO:0015077	GO:0033176	GO:0031224
Unigene14774_CmRNA	GO:0007411	GO:0030528	GO:0009888	GO:0043231	GO:0008354	GO:0046914	GO:0001071	GO:0003677	GO:0006959	GO:0048534	GO:0001700	GO:0045137	GO:0006351	GO:0042386
Unigene14775_CmRNA	GO:0004672	GO:0009987	GO:0000166
Unigene14779_CmRNA	GO:0004812	GO:0044444	GO:0006418	GO:0032559
Unigene14781_CmRNA	GO:0006464	GO:0043231	GO:0031224	GO:0016758
Unigene14784_CmRNA	GO:0004812	GO:0006418	GO:0000166
Unigene14787_CmRNA	GO:0016709	GO:0008152	GO:0050662
Unigene1478_CmRNA	GO:0048037	GO:0043231
Unigene14794_CmRNA	GO:0006163	GO:0004114
Unigene14797_CmRNA	GO:0005488
Unigene14799_CmRNA	GO:0051234	GO:0044448	GO:0003012	GO:0035026	GO:0017022	GO:0032155	GO:0035151	GO:0007391	GO:0003002	GO:0031674	GO:0032559	GO:0035071	GO:0030010	GO:0031034	GO:0010927	GO:0016887	GO:0001738	GO:0007476	GO:0016477	GO:0031032	GO:0016459
Unigene1479_CmRNA	GO:0008415
Unigene14802_CmRNA	GO:0070011
Unigene14808_CmRNA	GO:0007275	GO:0009653
Unigene1480_CmRNA	GO:0044238	GO:0044237
Unigene14813_CmRNA	GO:0009888	GO:0051276	GO:0048513	GO:0007059	GO:0022402	GO:0048646	GO:0005488	GO:0030017
Unigene14817_CmRNA	GO:0005488
Unigene14823_CmRNA	GO:0044459	GO:0032529	GO:0050794	GO:0030703
Unigene14826_CmRNA	GO:0031224	GO:0016757	GO:0043231
Unigene1482_CmRNA	GO:0046872
Unigene14831_CmRNA	GO:0043231
Unigene14841_CmRNA	GO:0046872	GO:0004721	GO:0008092	GO:0043232	GO:0022402
Unigene14846_CmRNA	GO:0019538	GO:0004175
Unigene14847_CmRNA	GO:0043234	GO:0005635	GO:0008565	GO:0044444	GO:0015630	GO:0015031
Unigene14848_CmRNA	GO:0003824
Unigene14849_CmRNA	GO:0048565	GO:0043231	GO:0006355	GO:0014016	GO:0001071	GO:0003677	GO:0048534	GO:0007380	GO:0003702
Unigene14850_CmRNA	GO:0006351	GO:0003677	GO:0032501	GO:0001071	GO:0043231
Unigene14854_CmRNA	GO:0016747
Unigene14857_CmRNA	GO:0034062	GO:0044452	GO:0006351	GO:0003676	GO:0015630
Unigene14859_CmRNA	GO:0017111	GO:0005764	GO:0035556	GO:0015630	GO:0000087	GO:0009207	GO:0005770	GO:0032561	GO:0015631	GO:0044430
Unigene14861_CmRNA	GO:0008081	GO:0005488	GO:0019400
Unigene14862_CmRNA	GO:0006007	GO:0016624	GO:0019842
Unigene14863_CmRNA	GO:0065008	GO:0008565	GO:0015630	GO:0042993	GO:0000087	GO:0030036	GO:0044444	GO:0005635
Unigene14864_CmRNA	GO:0032868	GO:0006357	GO:0000123	GO:0006474	GO:0003712	GO:0004468	GO:0015629	GO:0008283	GO:0000775	GO:0019899	GO:0016573	GO:0030017
Unigene14866_CmRNA	GO:0044238	GO:0008374
Unigene14870_CmRNA	GO:0016747	GO:0007276	GO:0030247	GO:0031224	GO:0006022
Unigene14872_CmRNA	GO:0016421	GO:0006732	GO:0044429	GO:0032559
Unigene14875_CmRNA	GO:0018212	GO:0016881	GO:0015078	GO:0032559
Unigene14877_CmRNA	GO:0044464	GO:0008047	GO:0009966
Unigene14885_CmRNA	GO:0005506
Unigene14886_CmRNA	GO:0008152	GO:0016628
Unigene14891_CmRNA	GO:0004866
Unigene14897_CmRNA	GO:0046914
Unigene14898_CmRNA	GO:0046872
Unigene1489_CmRNA	GO:0033036	GO:0033674	GO:0044448	GO:0007266	GO:0005088	GO:0016020	GO:0007405	GO:0006897	GO:0030136	GO:0005488	GO:0007416	GO:0008593
Unigene14900_CmRNA	GO:0003824
Unigene14901_CmRNA	GO:0016787
Unigene14906_CmRNA	GO:0006807	GO:0031224	GO:0004601	GO:0009058
Unigene14908_CmRNA	GO:0016020	GO:0005261	GO:0006810	GO:0009415
Unigene14912_CmRNA	GO:0008092	GO:0044464
Unigene14915_CmRNA	GO:0008092	GO:0005815	GO:0000228	GO:0047496	GO:0023052	GO:0007599	GO:0005871	GO:0050794	GO:0005819	GO:0065003
Unigene14916_CmRNA	GO:0001934	GO:0032559	GO:0004702
Unigene14923_CmRNA	GO:0004518
Unigene14924_CmRNA	GO:0044238	GO:0003676	GO:0044260
Unigene14925_CmRNA	GO:0009987	GO:0043234	GO:0015630	GO:0042995	GO:0003774	GO:0000166	GO:0008152	GO:0044430
Unigene14928_CmRNA	GO:0004812	GO:0006418	GO:0000166
Unigene14931_CmRNA	GO:0071702	GO:0031224	GO:0022857
Unigene14934_CmRNA	GO:0030695	GO:0010033	GO:0005737	GO:0006446	GO:0006950	GO:0005488	GO:0021782
Unigene14936_CmRNA	GO:0046914	GO:0019538	GO:0004175
Unigene14938_CmRNA	GO:0009987
Unigene14939_CmRNA	GO:0016787	GO:0046872
Unigene14944_CmRNA	GO:0016020
Unigene14945_CmRNA	GO:0006810	GO:0031224
Unigene14946_CmRNA	GO:0016884	GO:0009168	GO:0000166
Unigene14947_CmRNA	GO:0005488	GO:0043231	GO:0000307	GO:0006355	GO:0006352	GO:0016251	GO:0031572	GO:0019887
Unigene14948_CmRNA	GO:0009987	GO:0031224
Unigene14949_CmRNA	GO:0008152	GO:0016740
Unigene14951_CmRNA	GO:0009987
Unigene14955_CmRNA	GO:0003676
Unigene14956_CmRNA	GO:0005488
Unigene14957_CmRNA	GO:0030532	GO:0005681	GO:0003676	GO:0000380	GO:0000087
Unigene14959_CmRNA	GO:0010467	GO:0016772	GO:0003676
Unigene14962_CmRNA	GO:0009057	GO:0004175	GO:0019538	GO:0046914	GO:0043231	GO:0031224	GO:0016462	GO:0032559
Unigene14965_CmRNA	GO:0031224	GO:0043231	GO:0006486	GO:0048513	GO:0031090	GO:0035292	GO:0030258	GO:0000030
Unigene14971_CmRNA	GO:0016682	GO:0008152	GO:0046914
Unigene1497_CmRNA	GO:0016740
Unigene14981_CmRNA	GO:0070566	GO:0031123	GO:0003676	GO:0043231
Unigene14983_CmRNA	GO:0046914	GO:0003676	GO:0006020	GO:0010467	GO:0016701	GO:0044424
Unigene14985_CmRNA	GO:0016787
Unigene14991_CmRNA	GO:0015031	GO:0030119
Unigene14992_CmRNA	GO:0044431	GO:0030246	GO:0008376	GO:0031224	GO:0009311
Unigene14995_CmRNA	GO:0016746
Unigene14999_CmRNA	GO:0008238
Unigene15002_CmRNA	GO:0009987	GO:0044464	GO:0004871
Unigene15007_CmRNA	GO:0003824
Unigene15010_CmRNA	GO:0016787
Unigene15020_CmRNA	GO:0030695	GO:0008152
Unigene15021_CmRNA	GO:0005488	GO:0034641
Unigene15023_CmRNA	GO:0016787
Unigene15024_CmRNA	GO:0005488	GO:0017111
Unigene15029_CmRNA	GO:0009986	GO:0010259	GO:0043394	GO:0030509
Unigene15032_CmRNA	GO:0006810
Unigene15034_CmRNA	GO:0006810
Unigene15035_CmRNA	GO:0044237	GO:0005488	GO:0016620
Unigene15040_CmRNA	GO:0046872
Unigene15046_CmRNA	GO:0031224
Unigene15050_CmRNA	GO:0008152	GO:0003824
Unigene15059_CmRNA	GO:0006865	GO:0050789	GO:0031224	GO:0005275
Unigene15060_CmRNA	GO:0005488
Unigene15065_CmRNA	GO:0046872	GO:0044464
Unigene15067_CmRNA	GO:0031981	GO:0000781	GO:0005515	GO:0006310	GO:0043565	GO:0043234	GO:0022415	GO:0003690	GO:0003824	GO:0006281
Unigene15072_CmRNA	GO:0000346	GO:0005488	GO:0006406	GO:0006396
Unigene15074_CmRNA	GO:0006726	GO:0016787
Unigene15075_CmRNA	GO:0006935	GO:0009987	GO:0023052	GO:0004888
Unigene15078_CmRNA	GO:0016874	GO:0006412
Unigene15079_CmRNA	GO:0016798	GO:0008152
Unigene1507_CmRNA	GO:0044444	GO:0043234	GO:0051084	GO:0005515
Unigene15080_CmRNA	GO:0030695	GO:0044464	GO:0008047	GO:0000279	GO:0007059	GO:0009966	GO:0009887	GO:0035556
Unigene15085_CmRNA	GO:0005768	GO:0016791	GO:0010975
Unigene1509_CmRNA	GO:0032501
Unigene1514_CmRNA	GO:0005905	GO:0012510	GO:0015031
Unigene1515_CmRNA	GO:0042254
Unigene1517_CmRNA	GO:0043623	GO:0005515	GO:0015630
Unigene1521_CmRNA	GO:0005924	GO:0005488	GO:0031252	GO:0044444
Unigene1525_CmRNA	GO:0006351	GO:0005488	GO:0032991
Unigene1527_CmRNA	GO:0031224
Unigene1528_CmRNA	GO:0030684	GO:0042254
Unigene1530_CmRNA	GO:0017111	GO:0000166
Unigene1532_CmRNA	GO:0000931	GO:0034629	GO:0004672	GO:0000166
Unigene1535_CmRNA	GO:0005488
Unigene1539_CmRNA	GO:0016049	GO:0005102
Unigene1542_CmRNA	GO:0044238	GO:0044260	GO:0010467	GO:0044424
Unigene15588_CmRNA	GO:0044464	GO:0003723
Unigene15589_CmRNA	GO:0005102
Unigene15591_CmRNA	GO:0016757	GO:0016020
Unigene15592_CmRNA	GO:0030427	GO:0005818	GO:0007267	GO:0070161	GO:0001558	GO:0016198	GO:0016787	GO:0009886	GO:0007420	GO:0035148	GO:0035146	GO:0001709	GO:0007019	GO:0015631	GO:0060541	GO:0044444
Unigene15595_CmRNA	GO:0006810
Unigene15596_CmRNA	GO:0004175	GO:0043231	GO:0000502	GO:0006508
Unigene15598_CmRNA	GO:0044464	GO:0046914
Unigene155_CmRNA	GO:0030001	GO:0005886
Unigene15602_CmRNA	GO:0001934	GO:0030041	GO:0009967	GO:0043234	GO:0044444	GO:0032319
Unigene15605_CmRNA	GO:0000166
Unigene15608_CmRNA	GO:0031981	GO:0046914	GO:0044444	GO:0004812	GO:0000267	GO:0006418	GO:0032559
Unigene15609_CmRNA	GO:0006816	GO:0004871	GO:0043231	GO:0031224	GO:0005261	GO:0005217
Unigene15613_CmRNA	GO:0042802	GO:0048193	GO:0004871	GO:0006464	GO:0016301	GO:0044444	GO:0032559
Unigene15616_CmRNA	GO:0033764	GO:0019866	GO:0051260	GO:0008289	GO:0035258	GO:0007568	GO:0000166	GO:0044429	GO:0009063	GO:0003006
Unigene15619_CmRNA	GO:0031224
Unigene15620_CmRNA	GO:0006260	GO:0004175	GO:0019538	GO:0003676	GO:0034061
Unigene15621_CmRNA	GO:0016787
Unigene15623_CmRNA	GO:0031589
Unigene15624_CmRNA	GO:0016591	GO:0016073	GO:0016020
Unigene15626_CmRNA	GO:0046914
Unigene15631_CmRNA	GO:0016406
Unigene15635_CmRNA	GO:0005635	GO:0051234
Unigene15640_CmRNA	GO:0044464	GO:0032561	GO:0035556
Unigene15641_CmRNA	GO:0034062	GO:0044452	GO:0006351	GO:0005488
Unigene15644_CmRNA	GO:0006464	GO:0005506	GO:0004674	GO:0032559
Unigene15645_CmRNA	GO:0005488	GO:0050953	GO:0044464
Unigene15650_CmRNA	GO:0006259	GO:0043169	GO:0003676	GO:0043231	GO:0032559	GO:0000087
Unigene15651_CmRNA	GO:0005488
Unigene15653_CmRNA	GO:0043231	GO:0009987
Unigene15654_CmRNA	GO:0003676	GO:0009987	GO:0016462	GO:0005515	GO:0032559
Unigene15658_CmRNA	GO:0006277	GO:0016458	GO:0043231	GO:0003676	GO:0000070	GO:0000808	GO:0006260
Unigene1565_CmRNA	GO:0006259	GO:0006351	GO:0030528	GO:0043231
Unigene15662_CmRNA	GO:0019207	GO:0043234	GO:0043169	GO:0044464	GO:0007165	GO:0006796	GO:0016772
Unigene15666_CmRNA	GO:0016491
Unigene15667_CmRNA	GO:0048037	GO:0008152	GO:0003824
Unigene15669_CmRNA	GO:0006261	GO:0006351
Unigene15671_CmRNA	GO:0008168	GO:0006544	GO:0044424
Unigene15672_CmRNA	GO:0003676
Unigene1567_CmRNA	GO:0016647	GO:0006598
Unigene15680_CmRNA	GO:0046872
Unigene15683_CmRNA	GO:0003676	GO:0043170	GO:0044238
Unigene15684_CmRNA	GO:0043231	GO:0046527	GO:0016020	GO:0006487
Unigene15687_CmRNA	GO:0005488	GO:0005622	GO:0009987	GO:0016740
Unigene15690_CmRNA	GO:0003676	GO:0043170	GO:0044238
Unigene15692_CmRNA	GO:0003676
Unigene15693_CmRNA	GO:0031572	GO:0006351	GO:0016458	GO:0003916	GO:0016585	GO:0000267	GO:0051303	GO:0001071	GO:0005678	GO:0006259	GO:0032559	GO:0043565	GO:0000217	GO:0000070	GO:0003723	GO:0043232
Unigene15697_CmRNA	GO:0043231	GO:0006359
Unigene15700_CmRNA	GO:0051536	GO:0016836
Unigene15701_CmRNA	GO:0046872	GO:0008092	GO:0004721
Unigene15702_CmRNA	GO:0016879	GO:0006464	GO:0044464
Unigene15705_CmRNA	GO:0004180
Unigene15709_CmRNA	GO:0043231	GO:0043234	GO:0003676	GO:0019900	GO:0061135	GO:0043623	GO:0010627	GO:0010952	GO:0006354
Unigene15714_CmRNA	GO:0003824
Unigene15715_CmRNA	GO:0001727	GO:0007186	GO:0006796
Unigene15716_CmRNA	GO:0046872	GO:0003676
Unigene15717_CmRNA	GO:0004091
Unigene15720_CmRNA	GO:0015078	GO:0022900	GO:0005488	GO:0015630	GO:0005743	GO:0045333	GO:0000226	GO:0003824
Unigene15723_CmRNA	GO:0045926	GO:0035556	GO:0005488	GO:0006915	GO:0022402	GO:0005913	GO:0001745	GO:0043232	GO:0045570	GO:0016310	GO:0016197	GO:0007178	GO:0008283	GO:0007346
Unigene15724_CmRNA	GO:0006139	GO:0003676	GO:0016779
Unigene15726_CmRNA	GO:0046872
Unigene15729_CmRNA	GO:0006575	GO:0006766	GO:0016881	GO:0044429	GO:0006760	GO:0032559
Unigene15731_CmRNA	GO:0005488
Unigene15734_CmRNA	GO:0006810	GO:0043234	GO:0016021	GO:0042626	GO:0009207	GO:0006726	GO:0032559
Unigene15738_CmRNA	GO:0005488
Unigene15741_CmRNA	GO:0050954	GO:0042623	GO:0007476	GO:0015629	GO:0030029	GO:0017022	GO:0032559
Unigene15742_CmRNA	GO:0009987
Unigene15743_CmRNA	GO:0008233
Unigene15747_CmRNA	GO:0005737	GO:0004812	GO:0005488	GO:0006418
Unigene15751_CmRNA	GO:0009987	GO:0051179	GO:0005488	GO:0050789	GO:0040011	GO:0007275	GO:0010467
Unigene15752_CmRNA	GO:0015291	GO:0031224	GO:0015698
Unigene15757_CmRNA	GO:0043234	GO:0006259	GO:0031981	GO:0009165	GO:0016728	GO:0051262	GO:0044444	GO:0032559
Unigene15759_CmRNA	GO:0016209
Unigene15760_CmRNA	GO:0008593	GO:0048598	GO:0006469
Unigene15766_CmRNA	GO:0044260
Unigene15767_CmRNA	GO:0048037	GO:0050136	GO:0022904	GO:0005746
Unigene15769_CmRNA	GO:0044424	GO:0010212	GO:0072593
Unigene15770_CmRNA	GO:0005488
Unigene15776_CmRNA	GO:0005488	GO:0004721	GO:0004518	GO:0006397	GO:0044464	GO:0006796
Unigene15777_CmRNA	GO:0005488
Unigene15779_CmRNA	GO:0005506	GO:0008152	GO:0000041	GO:0003824	GO:0006875
Unigene1577_CmRNA	GO:0016337	GO:0016020
Unigene15783_CmRNA	GO:0031032	GO:0009888	GO:0004674	GO:0031674	GO:0005198	GO:0032559	GO:0006464
Unigene15785_CmRNA	GO:0017111	GO:0035556	GO:0004620	GO:0009207	GO:0032561	GO:0016020
Unigene15787_CmRNA	GO:0006909
Unigene15790_CmRNA	GO:0015850	GO:0031224	GO:0008493	GO:0042221
Unigene15794_CmRNA	GO:0044464	GO:0046914
Unigene15796_CmRNA	GO:0016802	GO:0044237
Unigene15797_CmRNA	GO:0032559	GO:0042623
Unigene15798_CmRNA	GO:0016787	GO:0005488
Unigene15799_CmRNA	GO:0008152	GO:0016491
Unigene1579_CmRNA	GO:0070011
Unigene15801_CmRNA	GO:0004553	GO:0030247	GO:0006026	GO:0043167
Unigene15802_CmRNA	GO:0004674	GO:0006464	GO:0032559
Unigene15803_CmRNA	GO:0005488	GO:0005764	GO:0031224
Unigene15804_CmRNA	GO:0000070	GO:0046983	GO:0000793	GO:0043231	GO:0044419
Unigene15806_CmRNA	GO:0003824
Unigene15808_CmRNA	GO:0046872	GO:0044464	GO:0015924
Unigene15811_CmRNA	GO:0005488
Unigene15815_CmRNA	GO:0019538	GO:0004175
Unigene15818_CmRNA	GO:0005488
Unigene15819_CmRNA	GO:0031224	GO:0006811	GO:0015301
Unigene1581_CmRNA	GO:0016787
Unigene15821_CmRNA	GO:0032559	GO:0042623
Unigene15823_CmRNA	GO:0030286	GO:0009207	GO:0003774	GO:0016887	GO:0007017	GO:0015631	GO:0032559
Unigene15829_CmRNA	GO:0046872	GO:0044464	GO:0019538	GO:0004197
Unigene15834_CmRNA	GO:0008152	GO:0003824
Unigene15836_CmRNA	GO:0046872
Unigene15840_CmRNA	GO:0016709	GO:0031966	GO:0046496
Unigene15845_CmRNA	GO:0003676	GO:0044464	GO:0046914
Unigene15851_CmRNA	GO:0003012	GO:0005515	GO:0005231	GO:0005626	GO:0006904	GO:0006906	GO:0015031	GO:0016021	GO:0044087	GO:0035216	GO:0001505
Unigene15853_CmRNA	GO:0044464	GO:0046914	GO:0000087
Unigene15856_CmRNA	GO:0005856	GO:0000377	GO:0005488	GO:0030529	GO:0031981
Unigene15857_CmRNA	GO:0006909
Unigene15858_CmRNA	GO:0003676
Unigene15860_CmRNA	GO:0016568	GO:0071103	GO:0005488	GO:0004468	GO:0006473	GO:0044424
Unigene15861_CmRNA	GO:0005099	GO:0044464	GO:0032318
Unigene15862_CmRNA	GO:0009987	GO:0005488
Unigene15863_CmRNA	GO:0016787
Unigene15869_CmRNA	GO:0044238	GO:0004091
Unigene15870_CmRNA	GO:0007606	GO:0005488	GO:0043231	GO:0004930
Unigene15871_CmRNA	GO:0016763	GO:0043096	GO:0044424
Unigene15873_CmRNA	GO:0006351	GO:0005488	GO:0016779	GO:0005634
Unigene15875_CmRNA	GO:0017111	GO:0003676	GO:0032559
Unigene15879_CmRNA	GO:0010467	GO:0009451	GO:0003676	GO:0006730	GO:0008168
Unigene15883_CmRNA	GO:0019318	GO:0043167	GO:0015928
Unigene15884_CmRNA	GO:0046872	GO:0006950	GO:0008152
Unigene15886_CmRNA	GO:0003824	GO:0008152
Unigene15887_CmRNA	GO:0006464	GO:0004702	GO:0032559
Unigene15892_CmRNA	GO:0023052
Unigene15895_CmRNA	GO:0016859	GO:0005681	GO:0044267
Unigene15903_CmRNA	GO:0015698	GO:0015081	GO:0015301	GO:0006818	GO:0031224	GO:0030001
Unigene15906_CmRNA	GO:0010467	GO:0009451	GO:0006730	GO:0005488	GO:0008168
Unigene15907_CmRNA	GO:0005488
Unigene15909_CmRNA	GO:0007166	GO:0043167	GO:0004620	GO:0006684	GO:0031224	GO:0004888
Unigene15911_CmRNA	GO:0016787
Unigene15915_CmRNA	GO:0004721	GO:0006796	GO:0006464
Unigene15917_CmRNA	GO:0046914	GO:0009057	GO:0032446	GO:0019787
Unigene15918_CmRNA	GO:0006458	GO:0044432	GO:0035251	GO:0005515	GO:0006487
Unigene15919_CmRNA	GO:0043234	GO:0022892	GO:0043231	GO:0016192	GO:0015031
Unigene15927_CmRNA	GO:0004872	GO:0042742	GO:0006959	GO:0032501	GO:0009653	GO:0031224	GO:0009987	GO:0005626	GO:0023052	GO:0044424
Unigene15928_CmRNA	GO:0016798	GO:0008152
Unigene15934_CmRNA	GO:0044421	GO:0003676	GO:0004091	GO:0044238
Unigene15936_CmRNA	GO:0016879	GO:0044444
Unigene15937_CmRNA	GO:0004812	GO:0006418
Unigene1593_CmRNA	GO:0016614	GO:0019538	GO:0010038
Unigene15940_CmRNA	GO:0005515	GO:0044267
Unigene15941_CmRNA	GO:0003676	GO:0032559	GO:0042623
Unigene15946_CmRNA	GO:0006351	GO:0003677	GO:0001071	GO:0005515	GO:0043231
Unigene15947_CmRNA	GO:0009987
Unigene15949_CmRNA	GO:0043169	GO:0006464	GO:0007165	GO:0004674	GO:0032559
Unigene15951_CmRNA	GO:0004091	GO:0005740	GO:0042598	GO:0005764	GO:0005635	GO:0031224	GO:0006650
Unigene15954_CmRNA	GO:0016740
Unigene15958_CmRNA	GO:0006796	GO:0016772
Unigene15963_CmRNA	GO:0016020	GO:0006810
Unigene15964_CmRNA	GO:0046914	GO:0048193	GO:0012507	GO:0015031
Unigene15968_CmRNA	GO:0006259	GO:0003676	GO:0003824
Unigene15975_CmRNA	GO:0010467	GO:0030529	GO:0005198
Unigene15977_CmRNA	GO:0030529
Unigene15979_CmRNA	GO:0016859	GO:0044444	GO:0044267	GO:0015630
Unigene15982_CmRNA	GO:0008344	GO:0048667	GO:0042461	GO:0032446	GO:0042221	GO:0007154	GO:0019787	GO:0032559
Unigene15987_CmRNA	GO:0010467	GO:0032991	GO:0005488	GO:0043231
Unigene15989_CmRNA	GO:0009209	GO:0016776	GO:0006796	GO:0009206	GO:0009132	GO:0044424	GO:0032559
Unigene15992_CmRNA	GO:0010467	GO:0030529	GO:0005198
Unigene15993_CmRNA	GO:0006351	GO:0003676	GO:0001071	GO:0034399
Unigene15996_CmRNA	GO:0010467	GO:0030529	GO:0005198
Unigene16001_CmRNA	GO:0004725	GO:0006796	GO:0006464
Unigene16002_CmRNA	GO:0004672	GO:0000166
Unigene16005_CmRNA	GO:0016301	GO:0016776	GO:0006796	GO:0032559	GO:0009205	GO:0044424
Unigene16006_CmRNA	GO:0016020	GO:0022900	GO:0003954
Unigene16009_CmRNA	GO:0003824
Unigene16011_CmRNA	GO:0022904	GO:0003954
Unigene16013_CmRNA	GO:0017111	GO:0032991	GO:0015630	GO:0000087	GO:0043623	GO:0009207	GO:0032561	GO:0007017	GO:0009790
Unigene16015_CmRNA	GO:0030139	GO:0031090	GO:0031981	GO:0051091	GO:0050851	GO:0006259	GO:0051320	GO:0030330	GO:0043066	GO:0007173	GO:0043161	GO:0002224	GO:0007249	GO:0051439	GO:0016192	GO:0000165	GO:0001818	GO:0005488	GO:0006917
Unigene16020_CmRNA	GO:0006412	GO:0017111	GO:0009207	GO:0008135	GO:0032561	GO:0044424
Unigene16023_CmRNA	GO:0005753	GO:0006818	GO:0015630	GO:0015077	GO:0015662	GO:0006754
Unigene16024_CmRNA	GO:0010467	GO:0030529	GO:0005198
Unigene16029_CmRNA	GO:0005198
Unigene16030_CmRNA	GO:0010467	GO:0030529	GO:0005198
Unigene16031_CmRNA	GO:0006412	GO:0022402	GO:0007169	GO:0006405	GO:0031332	GO:0008135	GO:0044444	GO:0000288	GO:0034518	GO:0007346
Unigene16034_CmRNA	GO:0031224
Unigene16035_CmRNA	GO:0010467	GO:0030529	GO:0005198
Unigene16039_CmRNA	GO:0007052	GO:0010467	GO:0015934	GO:0005198
Unigene16040_CmRNA	GO:0010467	GO:0030529	GO:0005198
Unigene16042_CmRNA	GO:0003723	GO:0010467	GO:0030529	GO:0005198
Unigene16043_CmRNA	GO:0007166	GO:0007424	GO:0044464	GO:0001736	GO:0003002	GO:0001700	GO:0001654	GO:0030154	GO:0004872	GO:0001894
Unigene16045_CmRNA	GO:0018904	GO:0015036	GO:0043231	GO:0019725
Unigene16046_CmRNA	GO:0046914
Unigene16047_CmRNA	GO:0043169	GO:0010467	GO:0030529	GO:0005198
Unigene16049_CmRNA	GO:0000470	GO:0031981
Unigene16052_CmRNA	GO:0016740
Unigene16057_CmRNA	GO:0043169	GO:0007052	GO:0003723	GO:0010467	GO:0015934	GO:0005198
Unigene16058_CmRNA	GO:0003954
Unigene1605_CmRNA	GO:0005488
Unigene16066_CmRNA	GO:0016651
Unigene16067_CmRNA	GO:0010467	GO:0030529	GO:0005198
Unigene16068_CmRNA	GO:0009987	GO:0004871
Unigene16070_CmRNA	GO:0006950	GO:0030529	GO:0005198
Unigene16072_CmRNA	GO:0010467	GO:0030529	GO:0005198
Unigene16073_CmRNA	GO:0010467	GO:0030529	GO:0005198
Unigene16074_CmRNA	GO:0016757
Unigene16076_CmRNA	GO:0007417	GO:0007126	GO:0003676	GO:0031981	GO:0009719	GO:0002164	GO:0033554	GO:0010259	GO:0000785	GO:0040009	GO:0007599	GO:0009653	GO:0034728	GO:0009790
Unigene16078_CmRNA	GO:0006825	GO:0006971	GO:0010038
Unigene1607_CmRNA	GO:0008415	GO:0043231	GO:0019752
Unigene16080_CmRNA	GO:0023052
Unigene16082_CmRNA	GO:0010467	GO:0030529	GO:0005198
Unigene16084_CmRNA	GO:0042742	GO:0044421
Unigene1608_CmRNA	GO:0004152	GO:0051540	GO:0019856	GO:0009174	GO:0044424
Unigene160_CmRNA	GO:0005198
Unigene1610_CmRNA	GO:0032561	GO:0043231
Unigene1611_CmRNA	GO:0003824
Unigene1612_CmRNA	GO:0005488	GO:0015630
Unigene1614_CmRNA	GO:0004812	GO:0006418	GO:0000166
Unigene1616_CmRNA	GO:0016791
Unigene1619_CmRNA	GO:0008374	GO:0016044	GO:0006644	GO:0031966
Unigene1622_CmRNA	GO:0006546	GO:0043234
Unigene1629_CmRNA	GO:0046666	GO:0016787	GO:0044267
Unigene1635_CmRNA	GO:0005622
Unigene1636_CmRNA	GO:0009987	GO:0008645	GO:0033036	GO:0012505
Unigene1642_CmRNA	GO:0000315	GO:0010467
Unigene166_CmRNA	GO:0006887
Unigene168_CmRNA	GO:0007588	GO:0007292	GO:0042335
Unigene17088_CmRNA	GO:0006796	GO:0016775	GO:0032559
Unigene17089_CmRNA	GO:0005198
Unigene17093_CmRNA	GO:0050954	GO:0022904	GO:0003954	GO:0005746
Unigene17095_CmRNA	GO:0010467	GO:0030529	GO:0005198
Unigene17100_CmRNA	GO:0008152	GO:0004553
Unigene17103_CmRNA	GO:0016859	GO:0044267
Unigene17108_CmRNA	GO:0016787
Unigene17109_CmRNA	GO:0031224	GO:0043231
Unigene17113_CmRNA	GO:0015002	GO:0005746	GO:0010259	GO:0022904	GO:0042598
Unigene17114_CmRNA	GO:0043231
Unigene17116_CmRNA	GO:0032559	GO:0050896
Unigene17117_CmRNA	GO:0016651	GO:0005739
Unigene17119_CmRNA	GO:0046872
Unigene17121_CmRNA	GO:0005539	GO:0005102
Unigene17122_CmRNA	GO:0006351	GO:0005488
Unigene17123_CmRNA	GO:0010467	GO:0030529	GO:0005198
Unigene17125_CmRNA	GO:0003824	GO:0008152
Unigene17127_CmRNA	GO:0004553	GO:0006026	GO:0043167
Unigene17128_CmRNA	GO:0017111	GO:0032991	GO:0015630	GO:0043623	GO:0009207	GO:0032561	GO:0007017
Unigene17129_CmRNA	GO:0044424
Unigene17131_CmRNA	GO:0016757	GO:0002118	GO:0005783
Unigene17136_CmRNA	GO:0016787
Unigene17137_CmRNA	GO:0046872
Unigene17138_CmRNA	GO:0010467	GO:0030529	GO:0005198	GO:0005488
Unigene17139_CmRNA	GO:0016301	GO:0009070	GO:0048513	GO:0032559
Unigene17141_CmRNA	GO:0050136	GO:0022904	GO:0005746
Unigene17143_CmRNA	GO:0043234	GO:0032787	GO:0044444	GO:0016418
Unigene17145_CmRNA	GO:0032559	GO:0050896
Unigene17148_CmRNA	GO:0008135	GO:0006909	GO:0007052	GO:0007166	GO:0070993	GO:0006412
Unigene17149_CmRNA	GO:0010467	GO:0030529	GO:0005198
Unigene17152_CmRNA	GO:0005488
Unigene17153_CmRNA	GO:0051234
Unigene17155_CmRNA	GO:0005488	GO:0010467	GO:0044444	GO:0030529	GO:0005198
Unigene17160_CmRNA	GO:0046872	GO:0042598	GO:0044444	GO:0016020
Unigene17164_CmRNA	GO:0030246
Unigene17170_CmRNA	GO:0012501	GO:0043169	GO:0051536	GO:0005746	GO:0009205	GO:0022904	GO:0042391	GO:0050136
Unigene17174_CmRNA	GO:0046872	GO:0044432	GO:0030246	GO:0005515	GO:0044267
Unigene17175_CmRNA	GO:0046872	GO:0044432	GO:0030246	GO:0005515	GO:0044267
Unigene17177_CmRNA	GO:0005789	GO:0006486	GO:0031224	GO:0004576
Unigene17181_CmRNA	GO:0046872
Unigene17182_CmRNA	GO:0009987	GO:0005840	GO:0003676	GO:0044446
Unigene17184_CmRNA	GO:0005198	GO:0016043	GO:0050794	GO:0006950
Unigene17185_CmRNA	GO:0043412	GO:0043231
Unigene17186_CmRNA	GO:0046872	GO:0005739	GO:0055114	GO:0003954
Unigene17189_CmRNA	GO:0010467	GO:0030529	GO:0005198
Unigene17190_CmRNA	GO:0043231	GO:0003676
Unigene17193_CmRNA	GO:0005488	GO:0044464
Unigene17201_CmRNA	GO:0015630	GO:0005838	GO:0019538	GO:0070011
Unigene17207_CmRNA	GO:0044237	GO:0044424	GO:0016802
Unigene17214_CmRNA	GO:0032559	GO:0043232
Unigene17215_CmRNA	GO:0003824	GO:0008152
Unigene17216_CmRNA	GO:0007052	GO:0010467	GO:0015935	GO:0005198
Unigene17219_CmRNA	GO:0043231	GO:0033177	GO:0019866	GO:0015077	GO:0006754
Unigene17221_CmRNA	GO:0008152	GO:0050662	GO:0016627
Unigene17222_CmRNA	GO:0017111	GO:0051259	GO:0044427	GO:0008023	GO:0009207	GO:0005515	GO:0044444	GO:0051234	GO:0032559
Unigene17223_CmRNA	GO:0016651	GO:0005746
Unigene17225_CmRNA	GO:0046872	GO:0016887	GO:0003774	GO:0072593	GO:0015629
Unigene17226_CmRNA	GO:0015078	GO:0015630	GO:0005746	GO:0004175	GO:0046914	GO:0051604	GO:0000226	GO:0022904
Unigene17230_CmRNA	GO:0006796	GO:0016772
Unigene17231_CmRNA	GO:0008152	GO:0016713	GO:0005506
Unigene17233_CmRNA	GO:0010467	GO:0030529	GO:0005198
Unigene17235_CmRNA	GO:0010467	GO:0030529	GO:0005198
Unigene17238_CmRNA	GO:0006952	GO:0001562
Unigene17239_CmRNA	GO:0005488
Unigene17240_CmRNA	GO:0050136	GO:0022904	GO:0000166	GO:0005746
Unigene17241_CmRNA	GO:0003824	GO:0043231
Unigene17242_CmRNA	GO:0016787
Unigene17244_CmRNA	GO:0042743	GO:0044444	GO:0016705	GO:0004601	GO:0019725
Unigene17249_CmRNA	GO:0046872	GO:0008152	GO:0016628
Unigene17255_CmRNA	GO:0016620	GO:0009081	GO:0043231	GO:0006206	GO:0005504
Unigene17258_CmRNA	GO:0017111	GO:0032991	GO:0015630	GO:0043623	GO:0009207	GO:0032561	GO:0007017
Unigene17261_CmRNA	GO:0022904	GO:0050136
Unigene17262_CmRNA	GO:0022904	GO:0005746
Unigene17263_CmRNA	GO:0003676	GO:0044424
Unigene17266_CmRNA	GO:0015630	GO:0016616	GO:0009062	GO:0005759	GO:0048037	GO:0016836
Unigene17268_CmRNA	GO:0046872
Unigene17270_CmRNA	GO:0031072
Unigene17271_CmRNA	GO:0005488
Unigene17273_CmRNA	GO:0016055	GO:0009887	GO:0016020	GO:0001664
Unigene17274_CmRNA	GO:0010467	GO:0030529	GO:0005198
Unigene17277_CmRNA	GO:0016192	GO:0048731	GO:0008593	GO:0008417	GO:0031982	GO:0005102	GO:0007155	GO:0006486	GO:0031228	GO:0009057
Unigene17278_CmRNA	GO:0044464	GO:0008047	GO:0009966
Unigene17279_CmRNA	GO:0006259	GO:0016830	GO:0044424
Unigene17281_CmRNA	GO:0043062	GO:0005488	GO:0005576	GO:0005198	GO:0016787
Unigene17282_CmRNA	GO:0003676	GO:0043170	GO:0044238
Unigene17283_CmRNA	GO:0044424	GO:0032989
Unigene17284_CmRNA	GO:0005515	GO:0043231	GO:0016070
Unigene17285_CmRNA	GO:0009207	GO:0032561	GO:0017111
Unigene17287_CmRNA	GO:0031224	GO:0031032	GO:0043231	GO:0048513	GO:0031090	GO:0030258	GO:0000030	GO:0006493	GO:0061061
Unigene17290_CmRNA	GO:0031224	GO:0006508	GO:0004190
Unigene17291_CmRNA	GO:0031981	GO:0006355	GO:0040009	GO:0043565	GO:0009790	GO:0043232	GO:0006325
Unigene17295_CmRNA	GO:0005488	GO:0030097	GO:0050794	GO:0006351
Unigene17298_CmRNA	GO:0007525
Unigene17299_CmRNA	GO:0016469	GO:0015988	GO:0015077
Unigene17302_CmRNA	GO:0004871	GO:0006464	GO:0004713	GO:0031224	GO:0007167	GO:0032559
Unigene17306_CmRNA	GO:0006909	GO:0006796	GO:0032559	GO:0019206
Unigene17307_CmRNA	GO:0006952	GO:0023052	GO:0031224	GO:0004872
Unigene17309_CmRNA	GO:0031224	GO:0030001	GO:0015373
Unigene17312_CmRNA	GO:0046914	GO:0016791	GO:0043231	GO:0043102
Unigene17314_CmRNA	GO:0032561	GO:0007423	GO:0048741	GO:0005102	GO:0007267	GO:0017111	GO:0060089	GO:0034285	GO:0050909	GO:0031234	GO:0030534	GO:0009207	GO:0007189	GO:0032403	GO:0007472
Unigene17316_CmRNA	GO:0030247	GO:0006022
Unigene17317_CmRNA	GO:0009987
Unigene17318_CmRNA	GO:0005622
Unigene17320_CmRNA	GO:0048806	GO:0033057	GO:0048729	GO:0044237	GO:0005578
Unigene17321_CmRNA	GO:0004175	GO:0019538	GO:0030247	GO:0044464	GO:0006022	GO:0004888
Unigene17324_CmRNA	GO:0060089	GO:0006351	GO:0003676	GO:0001071	GO:0043231	GO:0023052
Unigene17325_CmRNA	GO:0044448	GO:0050954	GO:0042623	GO:0007476	GO:0042995	GO:0015629	GO:0030029	GO:0017022	GO:0032559
Unigene17326_CmRNA	GO:0006260	GO:0004175	GO:0019538	GO:0046914	GO:0003676	GO:0034061
Unigene17327_CmRNA	GO:0004812	GO:0003723	GO:0006418	GO:0032559	GO:0044424
Unigene17330_CmRNA	GO:0044464	GO:0008047	GO:0009966
Unigene17332_CmRNA	GO:0043234	GO:0003676	GO:0003682	GO:0043231	GO:0006338	GO:0017111	GO:0032559
Unigene17335_CmRNA	GO:0007010	GO:0003824	GO:0015630
Unigene17340_CmRNA	GO:0043005	GO:0004175	GO:0022617	GO:0046872	GO:0045168	GO:0007292	GO:0008543	GO:0008152	GO:0007560	GO:0007424	GO:0016020
Unigene17342_CmRNA	GO:0008152	GO:0003824
Unigene17344_CmRNA	GO:0006810
Unigene17346_CmRNA	GO:0016787
Unigene17347_CmRNA	GO:0004812	GO:0006418	GO:0032559	GO:0015630
Unigene17351_CmRNA	GO:0044424	GO:0005515	GO:0033036	GO:0001745
Unigene17354_CmRNA	GO:0008092	GO:0017111	GO:0032559	GO:0015629
Unigene17357_CmRNA	GO:0043410	GO:0012501	GO:0008154
Unigene17361_CmRNA	GO:0009987	GO:0044424
Unigene17362_CmRNA	GO:0006497
Unigene17366_CmRNA	GO:0003002	GO:0009968	GO:0004674	GO:0004871	GO:0007186	GO:0006796	GO:0005543	GO:0007602	GO:0005102	GO:0032559	GO:0006464
Unigene17367_CmRNA	GO:0000377
Unigene17369_CmRNA	GO:0051234	GO:0043169	GO:0043231	GO:0031224	GO:0003824	GO:0022900
Unigene17375_CmRNA	GO:0032559	GO:0042623
Unigene17376_CmRNA	GO:0005615	GO:0001775	GO:0043623	GO:0005515	GO:0023052
[truncated: 6,840 more rows]
[truncated: 25 more columns]
