# Supplementary material for: Transcriptome and Gene Expression Analysis of the Rice Leaf Folder, Cnaphalocrosis medinalis
Source: PLoS One. 2012 Nov 19;7(11):e47401. doi: 10.1371/journal.pone.0047401 (PMC3501527; doi:10.1371/journal.pone.0047401)
Supplement: Table S4 — COG annotation of unigenes. (XLS) [file pone.0047401.s007.xls]

## Sheet: Table S4
Supplementary Table S4. COG annotation of unigenes.
Code	Functional-Categories	Gene-Number	Genes
A	RNA processing and modification	111	Unigene4877_CmRNA,COG5178	Unigene7303_CmRNA,COG5107	Unigene7361_CmRNA,COG5238	Unigene8051_CmRNA,COG1949	Unigene8506_CmRNA,COG5213	Unigene8696_CmRNA,COG5176	Unigene8762_CmRNA,COG5181	Unigene9675_CmRNA,COG5136	Unigene11308_CmRNA,COG5228	Unigene11391_CmRNA,COG5181	Unigene11715_CmRNA,COG5623	Unigene12510_CmRNA,COG5226	Unigene12646_CmRNA,COG2136	Unigene12943_CmRNA,COG5176	Unigene12946_CmRNA,COG5104	Unigene13397_CmRNA,COG5182	Unigene13489_CmRNA,COG5049	Unigene13631_CmRNA,COG5182	Unigene13635_CmRNA,COG5161	Unigene13696_CmRNA,COG5049	Unigene13751_CmRNA,COG5246	Unigene13859_CmRNA,COG0430	Unigene14145_CmRNA,COG5049	Unigene14652_CmRNA,COG5178	Unigene14801_CmRNA,COG5183	Unigene15464_CmRNA,COG5239	Unigene15534_CmRNA,COG2136	Unigene16737_CmRNA,COG5246	Unigene17633_CmRNA,COG5186	Unigene17674_CmRNA,COG5049	Unigene19023_CmRNA,COG5182	CL199.Contig1_CmRNA,COG5049	CL199.Contig2_CmRNA,COG5049	Unigene19755_CmRNA,COG5178	Unigene20106_CmRNA,COG5178	Unigene20280_CmRNA,COG5178	Unigene20859_CmRNA,COG5178	Unigene21320_CmRNA,COG5178	Unigene21739_CmRNA,COG5049	Unigene22929_CmRNA,COG5200	Unigene22951_CmRNA,COG5178	Unigene23280_CmRNA,COG5049	Unigene23565_CmRNA,COG5238	Unigene23724_CmRNA,COG5147	Unigene23927_CmRNA,COG5147	Unigene24479_CmRNA,COG2136	Unigene24877_CmRNA,COG5228
B	Chromatin structure and dynamics	243	Unigene4091_CmRNA,COG5602	Unigene4500_CmRNA,COG5259	Unigene4520_CmRNA,COG5032	Unigene5062_CmRNA,COG2036	Unigene5235_CmRNA,COG5648	Unigene5314_CmRNA,COG1243	Unigene5394_CmRNA,COG5076	Unigene5399_CmRNA,COG5648	Unigene5466_CmRNA,COG5076	Unigene5466_CmRNA,COG5137	Unigene5556_CmRNA,COG5137	Unigene5989_CmRNA,COG5602	Unigene6032_CmRNA,COG5648	Unigene6263_CmRNA,COG5137	Unigene6520_CmRNA,COG5137	Unigene6524_CmRNA,COG5137	Unigene6565_CmRNA,COG0123	Unigene6831_CmRNA,COG5076	Unigene6831_CmRNA,COG5137	Unigene7544_CmRNA,COG5076	Unigene7869_CmRNA,COG5137	Unigene8361_CmRNA,COG5032	Unigene8493_CmRNA,COG5648	Unigene8848_CmRNA,COG2036	Unigene8883_CmRNA,COG5531	Unigene8936_CmRNA,COG5137	Unigene9308_CmRNA,COG5531	Unigene9359_CmRNA,COG5648	Unigene9381_CmRNA,COG5262	Unigene9579_CmRNA,COG5137	Unigene9847_CmRNA,COG5648	Unigene9951_CmRNA,COG1243	Unigene9986_CmRNA,COG5137	Unigene10180_CmRNA,COG5034	Unigene10713_CmRNA,COG5137	Unigene10892_CmRNA,COG0123	Unigene11537_CmRNA,COG5137	Unigene11548_CmRNA,COG2036	Unigene11585_CmRNA,COG5032	Unigene12048_CmRNA,COG5137	Unigene12048_CmRNA,COG5406	Unigene12073_CmRNA,COG5114	Unigene12113_CmRNA,COG5648	Unigene12223_CmRNA,COG5648	Unigene12487_CmRNA,COG5027	Unigene12675_CmRNA,COG1243	Unigene12942_CmRNA,COG5076
C	Energy production and conversion	627	Unigene4259_CmRNA,COG5274	Unigene4349_CmRNA,COG0567	Unigene4396_CmRNA,COG0221	Unigene4489_CmRNA,COG0022	Unigene4513_CmRNA,COG0604	Unigene4548_CmRNA,COG1071	Unigene4604_CmRNA,COG1048	Unigene4695_CmRNA,COG0508	Unigene4707_CmRNA,COG1052	Unigene4757_CmRNA,COG0667	Unigene4815_CmRNA,COG1150	Unigene4815_CmRNA,COG0508	Unigene4843_CmRNA,COG1053	Unigene5046_CmRNA,COG1052	Unigene5154_CmRNA,COG0377	Unigene5329_CmRNA,COG0604	Unigene5396_CmRNA,COG5127	Unigene5484_CmRNA,COG3245	Unigene5491_CmRNA,COG0039	Unigene5515_CmRNA,COG0281	Unigene5517_CmRNA,COG0778	Unigene5561_CmRNA,COG0526	Unigene5624_CmRNA,COG0526	Unigene5755_CmRNA,COG0526	Unigene5822_CmRNA,COG0649	Unigene5930_CmRNA,COG1390	Unigene6330_CmRNA,COG0526	Unigene6394_CmRNA,COG0567	Unigene6628_CmRNA,COG4555	Unigene6944_CmRNA,COG1009	Unigene7208_CmRNA,COG0644	Unigene7232_CmRNA,COG0604	Unigene7254_CmRNA,COG0224	Unigene7297_CmRNA,COG0508	Unigene7435_CmRNA,COG0554	Unigene7714_CmRNA,COG0712	Unigene8275_CmRNA,COG1529	Unigene8336_CmRNA,COG0567	Unigene8510_CmRNA,COG1034	Unigene8560_CmRNA,COG4656	Unigene8613_CmRNA,COG0636	Unigene8624_CmRNA,COG1254	Unigene8644_CmRNA,COG0355	Unigene8678_CmRNA,COG0045	Unigene8720_CmRNA,COG0055	Unigene8804_CmRNA,COG1290	Unigene8829_CmRNA,COG0055
D	Cell cycle control, cell division, chromosome partitioning	806	Unigene4178_CmRNA,COG0455	Unigene4253_CmRNA,COG0455	Unigene4330_CmRNA,COG0489	Unigene4333_CmRNA,COG0455	Unigene4361_CmRNA,COG1196	Unigene4361_CmRNA,COG0455	Unigene4441_CmRNA,COG0455	Unigene4520_CmRNA,COG5032	Unigene4529_CmRNA,COG0455	Unigene4550_CmRNA,COG1196	Unigene4572_CmRNA,COG1196	Unigene4626_CmRNA,COG1196	Unigene4655_CmRNA,COG5184	Unigene4751_CmRNA,COG1196	Unigene4751_CmRNA,COG4942	Unigene4864_CmRNA,COG5189	Unigene4979_CmRNA,COG1196	Unigene5214_CmRNA,COG0455	Unigene5252_CmRNA,COG1196	Unigene5258_CmRNA,COG1196	Unigene5425_CmRNA,COG1196	Unigene5469_CmRNA,COG0455	Unigene5475_CmRNA,COG1196	Unigene5477_CmRNA,COG1196	Unigene5503_CmRNA,COG0455	Unigene5855_CmRNA,COG0455	Unigene5879_CmRNA,COG0455	Unigene6157_CmRNA,COG1196	Unigene6329_CmRNA,COG5126	Unigene6459_CmRNA,COG5024	Unigene6510_CmRNA,COG5126	Unigene6578_CmRNA,COG5244	Unigene6694_CmRNA,COG1674	Unigene6694_CmRNA,COG3115	Unigene6840_CmRNA,COG1674	Unigene6840_CmRNA,COG3115	Unigene6989_CmRNA,COG5189	Unigene7120_CmRNA,COG1674	Unigene7308_CmRNA,COG5103	Unigene7691_CmRNA,COG0455	Unigene8127_CmRNA,COG1196	Unigene8213_CmRNA,COG5035	Unigene8361_CmRNA,COG5032	Unigene8422_CmRNA,COG1674	Unigene8493_CmRNA,COG1674	Unigene8504_CmRNA,COG5189	Unigene8519_CmRNA,COG1674
E	Amino acid transport and metabolism	775	Unigene4113_CmRNA,COG0339	Unigene4173_CmRNA,COG0747	Unigene4210_CmRNA,COG0814	Unigene4212_CmRNA,COG0747	Unigene4269_CmRNA,COG0814	Unigene4318_CmRNA,COG0308	Unigene4348_CmRNA,COG0241	Unigene4363_CmRNA,COG0477	Unigene4430_CmRNA,COG0747	Unigene4616_CmRNA,COG0436	Unigene4660_CmRNA,COG2939	Unigene4707_CmRNA,COG0111	Unigene4711_CmRNA,COG2939	Unigene4716_CmRNA,COG0477	Unigene4721_CmRNA,COG2866	Unigene4801_CmRNA,COG0477	Unigene4832_CmRNA,COG0747	Unigene4878_CmRNA,COG0367	Unigene4880_CmRNA,COG0747	Unigene4894_CmRNA,COG0477	Unigene4951_CmRNA,COG0160	Unigene4987_CmRNA,COG0031	Unigene5016_CmRNA,COG2303	Unigene5045_CmRNA,COG1748	Unigene5046_CmRNA,COG0111	Unigene5094_CmRNA,COG0174	Unigene5129_CmRNA,COG0477	Unigene5228_CmRNA,COG0531	Unigene5267_CmRNA,COG2939	Unigene5325_CmRNA,COG3340	Unigene5365_CmRNA,COG0462	Unigene5439_CmRNA,COG0028	Unigene5469_CmRNA,COG0747	Unigene5472_CmRNA,COG1171	Unigene5516_CmRNA,COG0308	Unigene5524_CmRNA,COG0531	Unigene5556_CmRNA,COG2939	Unigene5565_CmRNA,COG0010	Unigene5572_CmRNA,COG0308	Unigene5752_CmRNA,COG2008	Unigene5821_CmRNA,COG0477	Unigene5828_CmRNA,COG0477	Unigene5913_CmRNA,COG0308	Unigene5929_CmRNA,COG0308	Unigene5935_CmRNA,COG0404	Unigene5955_CmRNA,COG1505	Unigene5955_CmRNA,COG1770
F	Nucleotide transport and metabolism	266	Unigene4088_CmRNA,COG1816	Unigene4250_CmRNA,COG0209	Unigene4339_CmRNA,COG0563	Unigene4438_CmRNA,COG2759	Unigene4574_CmRNA,COG1816	Unigene4581_CmRNA,COG0015	Unigene4862_CmRNA,COG0737	Unigene4945_CmRNA,COG0208	Unigene5081_CmRNA,COG2820	Unigene5120_CmRNA,COG0516	Unigene5244_CmRNA,COG0504	Unigene5307_CmRNA,COG0005	Unigene5365_CmRNA,COG0462	Unigene5429_CmRNA,COG0005	Unigene5687_CmRNA,COG0035	Unigene5687_CmRNA,COG0572	Unigene5708_CmRNA,COG0046	Unigene5834_CmRNA,COG0150	Unigene5855_CmRNA,COG0737	Unigene5987_CmRNA,COG0034	Unigene6096_CmRNA,COG0044	Unigene6241_CmRNA,COG0572	Unigene6590_CmRNA,COG0194	Unigene6707_CmRNA,COG0756	Unigene6897_CmRNA,COG1816	Unigene7005_CmRNA,COG0046	Unigene7107_CmRNA,COG0572	Unigene7159_CmRNA,COG0125	Unigene7260_CmRNA,COG2131	Unigene7369_CmRNA,COG0458	Unigene7450_CmRNA,COG0167	Unigene7752_CmRNA,COG0194	Unigene7844_CmRNA,COG1051	Unigene7887_CmRNA,COG1972	Unigene7999_CmRNA,COG0046	Unigene8080_CmRNA,COG1437	Unigene8091_CmRNA,COG0151	Unigene8275_CmRNA,COG4631	Unigene8335_CmRNA,COG1816	Unigene8396_CmRNA,COG0518	Unigene8409_CmRNA,COG0563	Unigene8431_CmRNA,COG0194	Unigene8498_CmRNA,COG0563	Unigene9064_CmRNA,COG0208	Unigene9236_CmRNA,COG0756	Unigene9354_CmRNA,COG0537	Unigene9366_CmRNA,COG0167
G	Carbohydrate transport and metabolism	1083	Unigene4115_CmRNA,COG3588	Unigene4221_CmRNA,COG3839	Unigene4227_CmRNA,COG2017	Unigene4236_CmRNA,COG0469	Unigene4253_CmRNA,COG2730	Unigene4271_CmRNA,COG5026	Unigene4276_CmRNA,COG2273	Unigene4291_CmRNA,COG5297	Unigene4363_CmRNA,COG0477	Unigene4391_CmRNA,COG1070	Unigene4405_CmRNA,COG0451	Unigene4423_CmRNA,COG5309	Unigene4430_CmRNA,COG5309	Unigene4441_CmRNA,COG2730	Unigene4463_CmRNA,COG0383	Unigene4521_CmRNA,COG1626	Unigene4575_CmRNA,COG5297	Unigene4641_CmRNA,COG5026	Unigene4716_CmRNA,COG0477	Unigene4801_CmRNA,COG0477	Unigene4824_CmRNA,COG0366	Unigene4849_CmRNA,COG5297	Unigene4894_CmRNA,COG0477	Unigene5096_CmRNA,COG0063	Unigene5129_CmRNA,COG0477	Unigene5214_CmRNA,COG2730	Unigene5261_CmRNA,COG0363	Unigene5469_CmRNA,COG2273	Unigene5503_CmRNA,COG2730	Unigene5537_CmRNA,COG1626	Unigene5659_CmRNA,COG1501	Unigene5821_CmRNA,COG0477	Unigene5828_CmRNA,COG0477	Unigene5850_CmRNA,COG5297	Unigene5850_CmRNA,COG2730	Unigene5855_CmRNA,COG2730	Unigene5963_CmRNA,COG2723	Unigene6059_CmRNA,COG0477	Unigene6117_CmRNA,COG5297	Unigene6117_CmRNA,COG2273	Unigene6117_CmRNA,COG5309	Unigene6168_CmRNA,COG3250	Unigene6177_CmRNA,COG1109	Unigene6199_CmRNA,COG0366	Unigene6204_CmRNA,COG5297	Unigene6286_CmRNA,COG0477	Unigene6351_CmRNA,COG0366
H	Coenzyme transport and metabolism	295	Unigene4221_CmRNA,COG1120	Unigene4461_CmRNA,COG0476	Unigene4507_CmRNA,COG0476	Unigene4660_CmRNA,COG0452	Unigene4707_CmRNA,COG0111	Unigene4707_CmRNA,COG1052	Unigene4951_CmRNA,COG0161	Unigene4964_CmRNA,COG0142	Unigene5046_CmRNA,COG1052	Unigene5046_CmRNA,COG0111	Unigene5320_CmRNA,COG0476	Unigene5320_CmRNA,COG1179	Unigene5439_CmRNA,COG0028	Unigene5556_CmRNA,COG0452	Unigene5890_CmRNA,COG0276	Unigene6055_CmRNA,COG0276	Unigene6087_CmRNA,COG0452	Unigene6418_CmRNA,COG0142	Unigene6520_CmRNA,COG0452	Unigene6520_CmRNA,COG4547	Unigene6831_CmRNA,COG0452	Unigene7190_CmRNA,COG1232	Unigene7324_CmRNA,COG1057	Unigene7577_CmRNA,COG2941	Unigene7649_CmRNA,COG0113	Unigene7744_CmRNA,COG0476	Unigene7862_CmRNA,COG0452	Unigene7869_CmRNA,COG0452	Unigene8066_CmRNA,COG0181	Unigene8132_CmRNA,COG0320	Unigene8362_CmRNA,COG0452	Unigene8412_CmRNA,COG0190	Unigene8504_CmRNA,COG0452	Unigene8506_CmRNA,COG0452	Unigene8619_CmRNA,COG0476	Unigene8842_CmRNA,COG1932	Unigene8922_CmRNA,COG0111	Unigene8922_CmRNA,COG1052	Unigene8936_CmRNA,COG0452	Unigene8944_CmRNA,COG0499	Unigene8989_CmRNA,COG0111	Unigene9336_CmRNA,COG1932	Unigene9337_CmRNA,COG4547	Unigene9430_CmRNA,COG0499	Unigene9579_CmRNA,COG0452	Unigene9787_CmRNA,COG0262	Unigene9794_CmRNA,COG0190
I	Lipid transport and metabolism	553	Unigene4259_CmRNA,COG5274	Unigene4311_CmRNA,COG1260	Unigene4355_CmRNA,COG3425	Unigene4361_CmRNA,COG2267	Unigene4390_CmRNA,COG1028	Unigene4818_CmRNA,COG1960	Unigene4874_CmRNA,COG1250	Unigene4921_CmRNA,COG1028	Unigene5075_CmRNA,COG0183	Unigene5123_CmRNA,COG1028	Unigene5176_CmRNA,COG2267	Unigene5229_CmRNA,COG1028	Unigene5442_CmRNA,COG0511	Unigene5442_CmRNA,COG0439	Unigene5449_CmRNA,COG1028	Unigene5576_CmRNA,COG2272	Unigene5655_CmRNA,COG0204	Unigene5675_CmRNA,COG1960	Unigene5876_CmRNA,COG1960	Unigene5891_CmRNA,COG2030	Unigene5950_CmRNA,COG4799	Unigene6084_CmRNA,COG3407	Unigene6142_CmRNA,COG0204	Unigene6159_CmRNA,COG1028	Unigene6245_CmRNA,COG1398	Unigene6595_CmRNA,COG1024	Unigene6867_CmRNA,COG1502	Unigene6997_CmRNA,COG4770	Unigene6997_CmRNA,COG0439	Unigene7078_CmRNA,COG0318	Unigene7078_CmRNA,COG1022	Unigene7312_CmRNA,COG0318	Unigene7487_CmRNA,COG3425	Unigene7567_CmRNA,COG2030	Unigene7657_CmRNA,COG1960	Unigene7712_CmRNA,COG1028	Unigene7886_CmRNA,COG5050	Unigene8098_CmRNA,COG1028	Unigene8317_CmRNA,COG1028	Unigene8322_CmRNA,COG1028	Unigene8329_CmRNA,COG1250	Unigene8509_CmRNA,COG0318	Unigene8571_CmRNA,COG0318	Unigene8590_CmRNA,COG1028	Unigene8738_CmRNA,COG1028	Unigene8824_CmRNA,COG1398	Unigene8871_CmRNA,COG2272
J	Translation, ribosomal structure and biogenesis	1750	Unigene4124_CmRNA,COG0513	Unigene4137_CmRNA,COG5593	Unigene4156_CmRNA,COG5269	Unigene4167_CmRNA,COG2123	Unigene4172_CmRNA,COG0522	Unigene4178_CmRNA,COG0532	Unigene4187_CmRNA,COG0539	Unigene4206_CmRNA,COG0060	Unigene4253_CmRNA,COG0532	Unigene4276_CmRNA,COG5099	Unigene4333_CmRNA,COG0532	Unigene4361_CmRNA,COG0532	Unigene4361_CmRNA,COG1187	Unigene4393_CmRNA,COG0441	Unigene4430_CmRNA,COG1530	Unigene4441_CmRNA,COG1187	Unigene4443_CmRNA,COG1530	Unigene4445_CmRNA,COG5269	Unigene4451_CmRNA,COG0532	Unigene4480_CmRNA,COG1374	Unigene4510_CmRNA,COG0023	Unigene4529_CmRNA,COG0532	Unigene4550_CmRNA,COG0532	Unigene4550_CmRNA,COG1498	Unigene4550_CmRNA,COG0130	Unigene4563_CmRNA,COG0018	Unigene4637_CmRNA,COG0162	Unigene4651_CmRNA,COG1530	Unigene4655_CmRNA,COG0532	Unigene4660_CmRNA,COG0144	Unigene4720_CmRNA,COG0088	Unigene4771_CmRNA,COG2123	Unigene4815_CmRNA,COG1530	Unigene4815_CmRNA,COG0255	Unigene4815_CmRNA,COG0532	Unigene4850_CmRNA,COG1498	Unigene4862_CmRNA,COG0532	Unigene4913_CmRNA,COG0216	Unigene4993_CmRNA,COG0513	Unigene5082_CmRNA,COG0513	Unigene5107_CmRNA,COG1187	Unigene5107_CmRNA,COG0532	Unigene5107_CmRNA,COG0513	Unigene5107_CmRNA,COG1530	Unigene5134_CmRNA,COG0532	Unigene5146_CmRNA,COG1096	Unigene5210_CmRNA,COG1498
K	Transcription	1342	Unigene4124_CmRNA,COG0513	Unigene4187_CmRNA,COG2183	Unigene4220_CmRNA,COG0515	Unigene4253_CmRNA,COG0515	Unigene4253_CmRNA,COG0086	Unigene4276_CmRNA,COG0086	Unigene4295_CmRNA,COG5025	Unigene4309_CmRNA,COG0515	Unigene4416_CmRNA,COG2183	Unigene4423_CmRNA,COG0515	Unigene4439_CmRNA,COG0515	Unigene4477_CmRNA,COG5576	Unigene4487_CmRNA,COG1061	Unigene4500_CmRNA,COG5259	Unigene4514_CmRNA,COG1958	Unigene4547_CmRNA,COG2183	Unigene4583_CmRNA,COG1675	Unigene4593_CmRNA,COG0515	Unigene4626_CmRNA,COG1318	Unigene4655_CmRNA,COG0515	Unigene4660_CmRNA,COG5164	Unigene4785_CmRNA,COG5111	Unigene4798_CmRNA,COG5190	Unigene4829_CmRNA,COG5108	Unigene4849_CmRNA,COG5164	Unigene4860_CmRNA,COG0515	Unigene4864_CmRNA,COG5189	Unigene4882_CmRNA,COG0086	Unigene4905_CmRNA,COG0086	Unigene4941_CmRNA,COG0515	Unigene4993_CmRNA,COG0513	Unigene5082_CmRNA,COG0513	Unigene5092_CmRNA,COG0553	Unigene5107_CmRNA,COG0513	Unigene5210_CmRNA,COG5164	Unigene5235_CmRNA,COG5068	Unigene5235_CmRNA,COG5624	Unigene5273_CmRNA,COG1958	Unigene5314_CmRNA,COG1243	Unigene5346_CmRNA,COG0515	Unigene5379_CmRNA,COG0513	Unigene5394_CmRNA,COG5076	Unigene5409_CmRNA,COG5025	Unigene5425_CmRNA,COG1318	Unigene5454_CmRNA,COG5641	Unigene5466_CmRNA,COG5076	Unigene5466_CmRNA,COG5137
L	Replication, recombination and repair	1173	Unigene4112_CmRNA,COG1643	Unigene4124_CmRNA,COG0513	Unigene4220_CmRNA,COG0515	Unigene4253_CmRNA,COG0515	Unigene4257_CmRNA,COG5600	Unigene4309_CmRNA,COG0515	Unigene4361_CmRNA,COG2812	Unigene4361_CmRNA,COG0419	Unigene4423_CmRNA,COG0515	Unigene4439_CmRNA,COG0515	Unigene4487_CmRNA,COG1061	Unigene4520_CmRNA,COG5032	Unigene4528_CmRNA,COG0419	Unigene4529_CmRNA,COG1112	Unigene4530_CmRNA,COG0419	Unigene4550_CmRNA,COG0419	Unigene4550_CmRNA,COG0470	Unigene4572_CmRNA,COG0419	Unigene4593_CmRNA,COG0515	Unigene4626_CmRNA,COG0419	Unigene4655_CmRNA,COG0515	Unigene4670_CmRNA,COG1643	Unigene4701_CmRNA,COG1525	Unigene4751_CmRNA,COG0419	Unigene4860_CmRNA,COG0515	Unigene4862_CmRNA,COG2812	Unigene4941_CmRNA,COG0515	Unigene4979_CmRNA,COG0419	Unigene4993_CmRNA,COG0513	Unigene5082_CmRNA,COG0513	Unigene5092_CmRNA,COG0553	Unigene5107_CmRNA,COG0513	Unigene5143_CmRNA,COG1112	Unigene5163_CmRNA,COG1643	Unigene5182_CmRNA,COG1643	Unigene5200_CmRNA,COG0494	Unigene5223_CmRNA,COG2801	Unigene5239_CmRNA,COG0188	Unigene5252_CmRNA,COG0419	Unigene5259_CmRNA,COG0419	Unigene5336_CmRNA,COG0470	Unigene5346_CmRNA,COG0515	Unigene5379_CmRNA,COG0513	Unigene5383_CmRNA,COG0419	Unigene5425_CmRNA,COG0419	Unigene5458_CmRNA,COG0419	Unigene5466_CmRNA,COG3569
M	Cell wall/membrane/envelope biogenesis	872	Unigene4162_CmRNA,COG3637	Unigene4253_CmRNA,COG0810	Unigene4253_CmRNA,COG3637	Unigene4267_CmRNA,COG0744	Unigene4405_CmRNA,COG0451	Unigene4430_CmRNA,COG3468	Unigene4430_CmRNA,COG2335	Unigene4550_CmRNA,COG3064	Unigene4655_CmRNA,COG0810	Unigene4660_CmRNA,COG0744	Unigene4815_CmRNA,COG3468	Unigene4815_CmRNA,COG0810	Unigene4815_CmRNA,COG3064	Unigene5214_CmRNA,COG3637	Unigene5258_CmRNA,COG3468	Unigene5383_CmRNA,COG0744	Unigene5425_CmRNA,COG3064	Unigene5503_CmRNA,COG0810	Unigene5503_CmRNA,COG3637	Unigene5512_CmRNA,COG3468	Unigene5624_CmRNA,COG0744	Unigene5870_CmRNA,COG0810	Unigene6000_CmRNA,COG1589	Unigene6157_CmRNA,COG1589	Unigene6157_CmRNA,COG0810	Unigene6250_CmRNA,COG3468	Unigene6693_CmRNA,COG0481	Unigene6752_CmRNA,COG0510	Unigene6955_CmRNA,COG0810	Unigene7207_CmRNA,COG0463	Unigene7466_CmRNA,COG0438	Unigene7488_CmRNA,COG0463	Unigene7604_CmRNA,COG3064	Unigene7621_CmRNA,COG1589	Unigene7869_CmRNA,COG0744	Unigene8026_CmRNA,COG0472	Unigene8069_CmRNA,COG0744	Unigene8405_CmRNA,COG1089	Unigene8560_CmRNA,COG3064	Unigene8560_CmRNA,COG3468	Unigene8560_CmRNA,COG0739	Unigene8564_CmRNA,COG3064	Unigene8564_CmRNA,COG3468	Unigene8564_CmRNA,COG0810	Unigene8687_CmRNA,COG0810	Unigene8687_CmRNA,COG0744	Unigene8687_CmRNA,COG3064
N	Cell motility	328	Unigene4550_CmRNA,COG3351	Unigene4655_CmRNA,COG0630	Unigene4667_CmRNA,COG0840	Unigene4815_CmRNA,COG3351	Unigene4849_CmRNA,COG5651	Unigene5210_CmRNA,COG1705	Unigene5259_CmRNA,COG5651	Unigene5425_CmRNA,COG1317	Unigene5425_CmRNA,COG0840	Unigene5484_CmRNA,COG3170	Unigene5936_CmRNA,COG5651	Unigene6157_CmRNA,COG3351	Unigene6157_CmRNA,COG0643	Unigene6250_CmRNA,COG5651	Unigene6671_CmRNA,COG3351	Unigene7862_CmRNA,COG1317	Unigene8475_CmRNA,COG5603	Unigene8504_CmRNA,COG1317	Unigene8564_CmRNA,COG3351	Unigene8564_CmRNA,COG1705	Unigene8675_CmRNA,COG3351	Unigene8675_CmRNA,COG0840	Unigene8687_CmRNA,COG3351	Unigene8800_CmRNA,COG1705	Unigene8800_CmRNA,COG5651	Unigene8879_CmRNA,COG5651	Unigene8936_CmRNA,COG1705	Unigene8936_CmRNA,COG3351	Unigene8936_CmRNA,COG1317	Unigene8962_CmRNA,COG1705	Unigene9020_CmRNA,COG0840	Unigene9062_CmRNA,COG1705	Unigene9186_CmRNA,COG1705	Unigene9351_CmRNA,COG3351	Unigene9352_CmRNA,COG5651	Unigene9352_CmRNA,COG1705	Unigene9514_CmRNA,COG3144	Unigene9579_CmRNA,COG1317	Unigene9690_CmRNA,COG0840	Unigene9702_CmRNA,COG3170	Unigene10858_CmRNA,COG3351	Unigene11284_CmRNA,COG1345	Unigene11635_CmRNA,COG5491	Unigene11811_CmRNA,COG0643	Unigene11900_CmRNA,COG1705	Unigene12048_CmRNA,COG1317	Unigene12471_CmRNA,COG3351
O	Posttranslational modification, protein turnover, chaperones	1323	Unigene4156_CmRNA,COG5269	Unigene4159_CmRNA,COG5160	Unigene4191_CmRNA,COG5640	Unigene4200_CmRNA,COG5071	Unigene4253_CmRNA,COG0443	Unigene4253_CmRNA,COG1404	Unigene4267_CmRNA,COG5021	Unigene4273_CmRNA,COG0443	Unigene4345_CmRNA,COG0484	Unigene4345_CmRNA,COG2214	Unigene4361_CmRNA,COG2377	Unigene4372_CmRNA,COG0533	Unigene4423_CmRNA,COG0443	Unigene4441_CmRNA,COG0443	Unigene4445_CmRNA,COG5269	Unigene4445_CmRNA,COG0484	Unigene4445_CmRNA,COG2214	Unigene4451_CmRNA,COG0443	Unigene4472_CmRNA,COG0638	Unigene4476_CmRNA,COG5021	Unigene4478_CmRNA,COG5021	Unigene4524_CmRNA,COG5656	Unigene4535_CmRNA,COG0443	Unigene4550_CmRNA,COG0760	Unigene4568_CmRNA,COG1222	Unigene4598_CmRNA,COG5272	Unigene4608_CmRNA,COG5078	Unigene4647_CmRNA,COG2214	Unigene4674_CmRNA,COG4826	Unigene4747_CmRNA,COG5640	Unigene4819_CmRNA,COG0484	Unigene4819_CmRNA,COG2214	Unigene4907_CmRNA,COG5078	Unigene4939_CmRNA,COG0501	Unigene4972_CmRNA,COG1076	Unigene5005_CmRNA,COG0443	Unigene5157_CmRNA,COG5640	Unigene5220_CmRNA,COG0501	Unigene5224_CmRNA,COG5046	Unigene5226_CmRNA,COG5021	Unigene5259_CmRNA,COG0265	Unigene5260_CmRNA,COG0638	Unigene5271_CmRNA,COG5110	Unigene5373_CmRNA,COG0459	Unigene5421_CmRNA,COG5148	Unigene5424_CmRNA,COG5540	Unigene5461_CmRNA,COG1404
P	Inorganic ion transport and metabolism	419	Unigene4162_CmRNA,COG1230	Unigene4221_CmRNA,COG1122	Unigene4221_CmRNA,COG1120	Unigene4361_CmRNA,COG1119	Unigene4363_CmRNA,COG0477	Unigene4376_CmRNA,COG1230	Unigene4716_CmRNA,COG0477	Unigene4801_CmRNA,COG0477	Unigene4894_CmRNA,COG0477	Unigene5129_CmRNA,COG0477	Unigene5501_CmRNA,COG1824	Unigene5709_CmRNA,COG0474	Unigene5711_CmRNA,COG0369	Unigene5821_CmRNA,COG0477	Unigene5828_CmRNA,COG0477	Unigene6059_CmRNA,COG0477	Unigene6286_CmRNA,COG0477	Unigene6286_CmRNA,COG2223	Unigene6338_CmRNA,COG2967	Unigene6401_CmRNA,COG0477	Unigene6401_CmRNA,COG2223	Unigene6527_CmRNA,COG0003	Unigene6615_CmRNA,COG1840	Unigene6628_CmRNA,COG1116	Unigene6628_CmRNA,COG4555	Unigene6684_CmRNA,COG0474	Unigene6944_CmRNA,COG1009	Unigene6956_CmRNA,COG0428	Unigene7061_CmRNA,COG0474	Unigene7140_CmRNA,COG1055	Unigene7304_CmRNA,COG0474	Unigene7613_CmRNA,COG1230	Unigene7835_CmRNA,COG4531	Unigene7841_CmRNA,COG2032	Unigene8073_CmRNA,COG3119	Unigene8114_CmRNA,COG1230	Unigene8114_CmRNA,COG0053	Unigene8266_CmRNA,COG2072	Unigene8295_CmRNA,COG0369	Unigene8415_CmRNA,COG0477	Unigene8520_CmRNA,COG3119	Unigene8549_CmRNA,COG0477	Unigene8551_CmRNA,COG1528	Unigene8734_CmRNA,COG1119	Unigene8818_CmRNA,COG1840	Unigene8952_CmRNA,COG0477	Unigene9174_CmRNA,COG0474
Q	Secondary metabolites biosynthesis, transport and catabolism	490	Unigene4390_CmRNA,COG1028	Unigene4441_CmRNA,COG2931	Unigene4451_CmRNA,COG1463	Unigene4451_CmRNA,COG2931	Unigene4513_CmRNA,COG3321	Unigene4921_CmRNA,COG1028	Unigene5123_CmRNA,COG1028	Unigene5229_CmRNA,COG1028	Unigene5329_CmRNA,COG3321	Unigene5449_CmRNA,COG1028	Unigene5503_CmRNA,COG2931	Unigene6043_CmRNA,COG3321	Unigene6159_CmRNA,COG1028	Unigene6565_CmRNA,COG0123	Unigene6925_CmRNA,COG2132	Unigene7078_CmRNA,COG0318	Unigene7312_CmRNA,COG0318	Unigene7712_CmRNA,COG1028	Unigene8098_CmRNA,COG1028	Unigene8190_CmRNA,COG3508	Unigene8317_CmRNA,COG1028	Unigene8322_CmRNA,COG1028	Unigene8509_CmRNA,COG0318	Unigene8571_CmRNA,COG0318	Unigene8590_CmRNA,COG1028	Unigene8652_CmRNA,COG2124	Unigene8729_CmRNA,COG2124	Unigene8738_CmRNA,COG1028	Unigene8744_CmRNA,COG2124	Unigene8879_CmRNA,COG2931	Unigene8894_CmRNA,COG2931	Unigene8894_CmRNA,COG1463	Unigene8933_CmRNA,COG1028	Unigene8937_CmRNA,COG2124	Unigene9000_CmRNA,COG2124	Unigene9002_CmRNA,COG2931	Unigene9002_CmRNA,COG1463	Unigene9029_CmRNA,COG3508	Unigene9295_CmRNA,COG2931	Unigene9326_CmRNA,COG2931	Unigene9560_CmRNA,COG2931	Unigene9606_CmRNA,COG1463	Unigene9606_CmRNA,COG2931	Unigene9665_CmRNA,COG1028	Unigene9744_CmRNA,COG0318	Unigene9744_CmRNA,COG1020	Unigene9754_CmRNA,COG1028
R	General function prediction only	2994	Unigene4089_CmRNA,COG2319	Unigene4127_CmRNA,COG0457	Unigene4162_CmRNA,COG0523	Unigene4168_CmRNA,COG0724	Unigene4173_CmRNA,COG2319	Unigene4220_CmRNA,COG0515	Unigene4221_CmRNA,COG1245	Unigene4253_CmRNA,COG0515	Unigene4253_CmRNA,COG2319	Unigene4256_CmRNA,COG0724	Unigene4263_CmRNA,COG2319	Unigene4270_CmRNA,COG2319	Unigene4274_CmRNA,COG2319	Unigene4279_CmRNA,COG2319	Unigene4286_CmRNA,COG0637	Unigene4288_CmRNA,COG0579	Unigene4309_CmRNA,COG0515	Unigene4337_CmRNA,COG1100	Unigene4344_CmRNA,COG0724	Unigene4354_CmRNA,COG0457	Unigene4363_CmRNA,COG0477	Unigene4390_CmRNA,COG1028	Unigene4390_CmRNA,COG4221	Unigene4399_CmRNA,COG5088	Unigene4417_CmRNA,COG0724	Unigene4423_CmRNA,COG0515	Unigene4424_CmRNA,COG0724	Unigene4431_CmRNA,COG2940	Unigene4439_CmRNA,COG0515	Unigene4441_CmRNA,COG2823	Unigene4443_CmRNA,COG5271	Unigene4450_CmRNA,COG0488	Unigene4460_CmRNA,COG1163	Unigene4470_CmRNA,COG5271	Unigene4477_CmRNA,COG5048	Unigene4513_CmRNA,COG0604	Unigene4538_CmRNA,COG1033	Unigene4538_CmRNA,COG2409	Unigene4549_CmRNA,COG0656	Unigene4550_CmRNA,COG0724	Unigene4553_CmRNA,COG1100	Unigene4565_CmRNA,COG0666	Unigene4593_CmRNA,COG0515	Unigene4635_CmRNA,COG0637	Unigene4637_CmRNA,COG0073	Unigene4651_CmRNA,COG0724	Unigene4655_CmRNA,COG0724
S	Function unknown	981	Unigene4212_CmRNA,COG4372	Unigene4253_CmRNA,COG1714	Unigene4253_CmRNA,COG3501	Unigene4253_CmRNA,COG4371	Unigene4361_CmRNA,COG4372	Unigene4361_CmRNA,COG1307	Unigene4423_CmRNA,COG3501	Unigene4430_CmRNA,COG2340	Unigene4530_CmRNA,COG5644	Unigene4550_CmRNA,COG1340	Unigene4572_CmRNA,COG4487	Unigene4608_CmRNA,COG4372	Unigene4647_CmRNA,COG5216	Unigene4651_CmRNA,COG4991	Unigene4660_CmRNA,COG5644	Unigene4784_CmRNA,COG1791	Unigene4815_CmRNA,COG3883	Unigene4816_CmRNA,COG4372	Unigene4862_CmRNA,COG3266	Unigene4930_CmRNA,COG3391	Unigene4997_CmRNA,COG4886	Unigene5176_CmRNA,COG4372	Unigene5221_CmRNA,COG1756	Unigene5252_CmRNA,COG1340	Unigene5355_CmRNA,COG2850	Unigene5466_CmRNA,COG1340	Unigene5469_CmRNA,COG3501	Unigene5484_CmRNA,COG3743	Unigene5503_CmRNA,COG1714	Unigene5618_CmRNA,COG0327	Unigene5863_CmRNA,COG3501	Unigene6000_CmRNA,COG4499	Unigene6133_CmRNA,COG2340	Unigene6157_CmRNA,COG4499	Unigene6157_CmRNA,COG1340	Unigene6204_CmRNA,COG3501	Unigene6250_CmRNA,COG3501	Unigene6350_CmRNA,COG5604	Unigene6404_CmRNA,COG5473	Unigene6615_CmRNA,COG3266	Unigene6694_CmRNA,COG2340	Unigene7189_CmRNA,COG4886	Unigene7287_CmRNA,COG1739	Unigene7326_CmRNA,COG2106	Unigene7424_CmRNA,COG4372	Unigene7597_CmRNA,COG5291	Unigene7691_CmRNA,COG3501
T	Signal transduction mechanisms	695	Unigene4097_CmRNA,COG0664	Unigene4220_CmRNA,COG0515	Unigene4247_CmRNA,COG1716	Unigene4253_CmRNA,COG0515	Unigene4266_CmRNA,COG3476	Unigene4309_CmRNA,COG0515	Unigene4423_CmRNA,COG0515	Unigene4439_CmRNA,COG0515	Unigene4488_CmRNA,COG5599	Unigene4520_CmRNA,COG5032	Unigene4593_CmRNA,COG0515	Unigene4638_CmRNA,COG5599	Unigene4644_CmRNA,COG1716	Unigene4655_CmRNA,COG0515	Unigene4667_CmRNA,COG0840	Unigene4860_CmRNA,COG0515	Unigene4901_CmRNA,COG0631	Unigene4925_CmRNA,COG0664	Unigene4941_CmRNA,COG0515	Unigene4994_CmRNA,COG5599	Unigene5176_CmRNA,COG5422	Unigene5346_CmRNA,COG0515	Unigene5423_CmRNA,COG2453	Unigene5425_CmRNA,COG0840	Unigene5469_CmRNA,COG0515	Unigene5757_CmRNA,COG0515	Unigene5803_CmRNA,COG0515	Unigene6122_CmRNA,COG0515	Unigene6140_CmRNA,COG0515	Unigene6143_CmRNA,COG0515	Unigene6157_CmRNA,COG0643	Unigene6329_CmRNA,COG5126	Unigene6510_CmRNA,COG5126	Unigene6520_CmRNA,COG0515	Unigene6594_CmRNA,COG0515	Unigene6612_CmRNA,COG0515	Unigene6840_CmRNA,COG0515	Unigene7002_CmRNA,COG5329	Unigene7065_CmRNA,COG0515	Unigene7079_CmRNA,COG0515	Unigene7138_CmRNA,COG5329	Unigene7361_CmRNA,COG5238	Unigene7490_CmRNA,COG0631	Unigene7644_CmRNA,COG4725	Unigene7660_CmRNA,COG0515	Unigene7782_CmRNA,COG0834	Unigene7813_CmRNA,COG0515
U	Intracellular trafficking, secretion, and vesicular transport	621	Unigene4197_CmRNA,COG0681	Unigene4379_CmRNA,COG5196	Unigene4430_CmRNA,COG3468	Unigene4520_CmRNA,COG5032	Unigene4655_CmRNA,COG0552	Unigene4655_CmRNA,COG5295	Unigene4655_CmRNA,COG0630	Unigene4815_CmRNA,COG3468	Unigene4815_CmRNA,COG0552	Unigene5030_CmRNA,COG5232	Unigene5210_CmRNA,COG1705	Unigene5258_CmRNA,COG3468	Unigene5425_CmRNA,COG1317	Unigene5474_CmRNA,COG5232	Unigene5484_CmRNA,COG4796	Unigene5484_CmRNA,COG3170	Unigene5512_CmRNA,COG3468	Unigene5855_CmRNA,COG4796	Unigene6250_CmRNA,COG3468	Unigene6250_CmRNA,COG4796	Unigene6587_CmRNA,COG5325	Unigene6705_CmRNA,COG5028	Unigene6840_CmRNA,COG0342	Unigene7604_CmRNA,COG3210	Unigene7862_CmRNA,COG1317	Unigene8316_CmRNA,COG5158	Unigene8361_CmRNA,COG5032	Unigene8387_CmRNA,COG5347	Unigene8504_CmRNA,COG1317	Unigene8508_CmRNA,COG5196	Unigene8560_CmRNA,COG3468	Unigene8560_CmRNA,COG3210	Unigene8564_CmRNA,COG0552	Unigene8564_CmRNA,COG3468	Unigene8564_CmRNA,COG1705	Unigene8577_CmRNA,COG5233	Unigene8800_CmRNA,COG1705	Unigene8800_CmRNA,COG5347	Unigene8903_CmRNA,COG5407	Unigene8921_CmRNA,COG0541	Unigene8936_CmRNA,COG1705	Unigene8936_CmRNA,COG1317	Unigene8938_CmRNA,COG5058	Unigene8962_CmRNA,COG1705	Unigene9062_CmRNA,COG1705	Unigene9128_CmRNA,COG3468	Unigene9186_CmRNA,COG1705
V	Defense mechanisms	155	Unigene4221_CmRNA,COG1131	Unigene5628_CmRNA,COG1132	Unigene5628_CmRNA,COG2274	Unigene6192_CmRNA,COG1132	Unigene6192_CmRNA,COG2274	Unigene6347_CmRNA,COG1132	Unigene6567_CmRNA,COG1132	Unigene6628_CmRNA,COG1131	Unigene6628_CmRNA,COG1136	Unigene7124_CmRNA,COG1132	Unigene7299_CmRNA,COG1131	Unigene7667_CmRNA,COG1132	Unigene7997_CmRNA,COG1131	Unigene7997_CmRNA,COG1136	Unigene8194_CmRNA,COG1132	Unigene8194_CmRNA,COG2274	Unigene9002_CmRNA,COG2720	Unigene9690_CmRNA,COG0577	Unigene9702_CmRNA,COG1401	Unigene9813_CmRNA,COG1132	Unigene9813_CmRNA,COG2274	Unigene9884_CmRNA,COG1132	Unigene9921_CmRNA,COG1132	Unigene9966_CmRNA,COG1131	Unigene9966_CmRNA,COG1136	Unigene10317_CmRNA,COG1132	Unigene10322_CmRNA,COG1132	Unigene11429_CmRNA,COG1132	Unigene11761_CmRNA,COG1132	Unigene12306_CmRNA,COG2274	Unigene12306_CmRNA,COG1132	Unigene12542_CmRNA,COG1131	Unigene12542_CmRNA,COG1136	Unigene12569_CmRNA,COG1132	Unigene12665_CmRNA,COG0842	Unigene13103_CmRNA,COG1132	Unigene13392_CmRNA,COG1131	Unigene13436_CmRNA,COG1132	Unigene13905_CmRNA,COG1132	Unigene14681_CmRNA,COG1132	Unigene14681_CmRNA,COG2274	Unigene14711_CmRNA,COG1132	Unigene15219_CmRNA,COG1131	Unigene15362_CmRNA,COG2720	Unigene15445_CmRNA,COG1132	Unigene15687_CmRNA,COG2720	Unigene15993_CmRNA,COG1566
W	Extracellular structures	25	Unigene4655_CmRNA,COG5295	Unigene9352_CmRNA,COG5295	Unigene16431_CmRNA,COG5295	Unigene16832_CmRNA,COG5295	CL12.Contig1_CmRNA,COG5295	CL12.Contig2_CmRNA,COG5295	CL120.Contig2_CmRNA,COG5295	CL265.Contig1_CmRNA,COG5295	CL265.Contig2_CmRNA,COG5295	CL265.Contig3_CmRNA,COG5295	Unigene27744_CmRNA,COG5295	Unigene31539_CmRNA,COG5295	CL1069.Contig1_CmRNA,COG5295	CL1281.Contig1_CmRNA,COG5295	CL1335.Contig1_CmRNA,COG5295	CL1419.Contig1_CmRNA,COG5295	CL1900.Contig1_CmRNA,COG5295	CL2665.Contig1_CmRNA,COG5295	CL2665.Contig2_CmRNA,COG5295	CL2967.Contig2_CmRNA,COG5295	CL3585.Contig2_CmRNA,COG5295	Unigene2_CmRNA,COG5295	Unigene360_CmRNA,COG5295	Unigene713_CmRNA,COG5295	Unigene1939_CmRNA,COG5295
Y	Nuclear structure	8	Unigene5131_CmRNA,COG5100	Unigene10395_CmRNA,COG5101	Unigene11576_CmRNA,COG5101	Unigene19861_CmRNA,COG5100	Unigene22210_CmRNA,COG5100	Unigene23121_CmRNA,COG5100	Unigene23568_CmRNA,COG5100	CL720.Contig1_CmRNA,COG5101
Z	Cytoskeleton	350	Unigene4361_CmRNA,COG5022	Unigene4572_CmRNA,COG5022	Unigene4655_CmRNA,COG5184	Unigene4970_CmRNA,COG5059	Unigene5252_CmRNA,COG5022	Unigene5290_CmRNA,COG5059	Unigene5340_CmRNA,COG5277	Unigene5505_CmRNA,COG5245	Unigene5514_CmRNA,COG5277	Unigene5863_CmRNA,COG5059	Unigene6034_CmRNA,COG5023	Unigene6042_CmRNA,COG5277	Unigene6329_CmRNA,COG5126	Unigene6510_CmRNA,COG5126	Unigene7004_CmRNA,COG5277	Unigene7049_CmRNA,COG5023	Unigene7395_CmRNA,COG5245	Unigene7892_CmRNA,COG5277	Unigene8314_CmRNA,COG5277	Unigene8507_CmRNA,COG5022	Unigene8606_CmRNA,COG5126	Unigene8625_CmRNA,COG5022	Unigene8651_CmRNA,COG5126	Unigene8675_CmRNA,COG5022	Unigene8704_CmRNA,COG5022	Unigene8734_CmRNA,COG5022	Unigene8786_CmRNA,COG5022	Unigene8786_CmRNA,COG5059	Unigene8860_CmRNA,COG5022	Unigene8953_CmRNA,COG5126	Unigene9020_CmRNA,COG5022	Unigene9067_CmRNA,COG5023	Unigene9082_CmRNA,COG5022	Unigene9419_CmRNA,COG5199	Unigene9432_CmRNA,COG5022	Unigene9513_CmRNA,COG5022	Unigene9690_CmRNA,COG5022	Unigene9948_CmRNA,COG5069	Unigene9994_CmRNA,COG5126	Unigene10260_CmRNA,COG5022	Unigene10268_CmRNA,COG5022	Unigene11221_CmRNA,COG5069	Unigene11276_CmRNA,COG5022	Unigene11286_CmRNA,COG5184	Unigene11322_CmRNA,COG5023	Unigene11326_CmRNA,COG5184	Unigene11386_CmRNA,COG5069
[truncated: 206 more columns]
