# Supplementary material for: Transcriptome and Gene Expression Analysis of the Rice Leaf Folder, Cnaphalocrosis medinalis
Source: PLoS One. 2012 Nov 19;7(11):e47401. doi: 10.1371/journal.pone.0047401 (PMC3501527; doi:10.1371/journal.pone.0047401)
Supplement: Table S6 — Sequence information of unigenes encoded odorant-binding proteins (OBPs). (XLS) [file pone.0047401.s009.xls]

## Sheet: Table S4
Supplementary Table S6. Sequence information of unigenes encoded odorant-binding proteins (OBPs).
Name	Unigene ID	Length	Sequence
CmedOBP1	CL3092.Contig1_CmRNA	941	TGAGTTTGGACCTTATTGACCACCATTTTTGTATATGTATGTGCACCTAC TTAATGTTATTTTCCGTTTCTTTTTACCTATTTACTTATATTATACCTTG TACTCTGTGTCATACTATTTTTTGTGTTATATGTTATCCTTTCTGTTTGT GGTCAATAAATGTTTTACTTACTTACTTACTTAGACGGGAAAAGTTGGTC GTATGTTATCTTAAGGAATATTTTGTTGGCAACACTTATTCCAATTTTGT TCCAATTTGCCTGGGCGTATGGTAGCAACTCCCTGTAGAGAAGTCTCCAG TTTTGATTGGTGAATCTATTCCCCAATTCGGTCAAATCTCTACTGTCTGG ATTATCATTTGTTAAATGCGATTTCATGCTGCCTACATCGGG…
CmedOBP2	Unigene16055_CmRNA	614	GGTATATTGGCTAAGGGTCGATAGTTATGTTTTCCTAGTAATCAGATTTC ATAGAGTTACTTTATTATACTCGACTGGTATATCACAGTTTTCAGCGACG ACGGGCTTCAGGCATCAATTCTGACTTGTGTTTGGCGAAACAGCCCAGGA GCAACTTCGAGCGCTCGCAGCCCTCCTTACCATCAGACACGTCCTCGTCA TTCACTTTGGCACAGTCATTTGCAATATCCTTGAACTTGGCTTTATCATC GTCGCTGCTCAGGTATTTGTTGCTGTCTTCAATCGCTACGTCTGGGTCGT ACAAGCCTTCATCATTGACCAGCTTGGTACTCTTGAAGACGCATCCGATG AGGCAAGGGTCCATGCCCTCGATGTCGTGCTTCTCCTTCGCT…
CmedOBP3	Unigene18775_CmRNA	673	ACCTGATATGATCCATAAGGGTGCATATAAATATCTTCGAAAATTAAAGC TTATTTTCATTTATTTTATGGTGACCGTGGTAACGCGTAGCATGCATTAC AGGAGCCAATAGGGATTTGTTGTGAGAAGCACTCCGACGGGCACAAGGGG CAGGAGGCGGCAAACCGGCGCACGGCCTCGCACTTGGGTGACGTCGACCA CTGGGACGGCTGGGCGTTCTTGATTAGATAGTGTAGCCAGCACGTCACAA CGTCGTAAGCAGGGCAGTTGAGGTAGTACCCCTGAGCGGGTAGGTCGTAA GTGGCGCAGGCCGCCTTCGCTGGCTCGATGAGGGGCGCCCACTCCGGATG CGAGACTCCATACATATCGAACACCTCCCGCAGCTTCGCCTT…
CmedOBP4	Unigene276_CmRNA	646	GCATTTTTTTTACCTACTTCATTATTTACTCGCTATATCAGCAGTTGAAG AAAAAGCTTTATTGTATTAAATATTCCTATTAAAATGTTCCGGTTCATAT TAGCAGCAATTTTAGCCCTTACTGTTGCAGACGAGCAGACAGTTCTCCTA AGGGTCATAGACGCTGAGTTACTTCAAGATACGAGTAGAAGTAGAGGGGC CACTTTGAAACCAATATCAGCATGCTGTGATATTCCAGAATTAGGTGATC CTAAACCACTTTCTGAATGTTCCAATCCGAAATTATCTGGTCCTTGTAAC GACATCCAATGTGTATTCGAGAAGTCTGGCTTCTTAGTCGACAAGAACAC CCTCAATAAGGATGTATACCGCCGCCACCTCAGGAAATGGGC…
CmedOBP5	Unigene28300_CmRNA	353	GTCCTATCGAGAATCATACGTAGATACATATATCTACCTATTTTAATCCT TGCTCCTAATATTTTAAAAGTACCAAGCTAATATCACTGTCGTCCTCTTC ACCTCCTTACAACATCATCATCAGCATTAAGGTCGTGCTAGTATCGCTCT ATGACCGCCTCAATCATGGTGATCTCGGGAGCGATGCCTTCCTTCTGGCA GTCCTTCTTGAAGCAGGCTGCCACCTTCACGGTCCTGTCGCAGTCGTCCG TGATGGCGTCGTACTGCTTCTCGCAGTTGTGGAGGAGTTCCACCATCTTG GCGGAGAGGACCTCACCATTAGGGAAGCTCTTGACATAGTCATGCATGTT GAC
CmedOBP6	Unigene33626_CmRNA	542	CGCGGCCAGTCGCACTCCTTTCGCCGCACGTGACAGAAAAAACTCGTTCG AATTTTAAAATTTACGAAAAATAAAGTGTCAAATTGGGAAAGTTGAAAAG AGGTTGGTGTTGTGTGAAAACAAAATGGTTCGCCAAATTAGTGCGCTTCT GTGTTGCCTCTGCATGTTCGGCATTTCTTTGAGTGATAGCGCCATATCAG CTGATAGCGAAAAAAGATGTCGAAACCCGCCCACAGCCCCGCAGAAGATT GAAAGGGTGATCACATTATGTCAAGATGAAATTAAATTGTCTATTTTGAG AGAGGCCTTGGATGTGATCAAGGAGGAGCACACAATGCCGGAGAAGAGGC GGCGGAACAAGCGAGAGGTGCCCTTCACTCACGACGAGAAAC…
CmedOBP7	Unigene9094_CmRNA	894	CTTCACGGAGCAGGCAAGTCGTGTCCAAATGTCTAAGATGTCCAAAAAAG TTTTGACATTTATTTGTTTAGTAAGTTTTATCAGCATCGGAAATTTTGCA GCTGTGCCAAATCTCACAAAATGTTTGTCAACGGACAACAAATGTTTGAA GTCCTCGGCTCAAGCCCTATTACCAATATTTGCGAAGGGACTTCCTGAAT ATGGCGTGGAACCTCTAGACCCTGTCACATTTAAGAAACCGATCGACGCC AGCGCAGCAGGGCTAAAACTCATCATCAACAACTTTGTAGTAAAAGGAAT GAAGGATTGTGTCTTGAAAAAAATCTCACGTGACGTTCCTAACTCAAAAT TGATGGGTAAAATTCTATGCAACGTGGTTGGAGACGGTGATT…
CmedOBP8	Unigene9631_CmRNA	718	GGGCCGTAAGGTTAAATGAAGAATCATAATTTCAATGACGGTTTAATAGT TAACTTGAATCTTGTGCTTGTTGGAGATCATGAGGTCGTTGGTGCAGGCG TTGAGCCGCGCCGCGAGCGCACACTCGTCCCCGCGGTACGCAGCGCTCAT CTCCACACAGCGGTCCAGATTCTTCTCCAGTTTCTTCATCAGCTTTGTGT CTTTTGCGTAAAATTTGCCGACTAACGAAATGAGGTTGCCTTTATTAATC TTCCCATGCTCTATCACCCCATTGCGCTTCAGCACACAGGCTATAAGGCA CTCCCCGTGCACAGGGGACTCCTGTTTCGGGGAGATCCTCTTCACCGGCC GCTTGTCCTGCGCCTGCGTCTCCTTGAGGCACTCCGTCATGT…
CmedOBP9	Unigene13117_CmRNA	336	GTAGCATCGGTTCAGTAAATATGGCGTCGAGGTCAGCGTGGTTGATGGTG CTGGTGGTGTCGCTGGGCGGCGCGCGGGGCATGGACGAGGAGATGGCGGA GCTGGCCAAGATGCTGCACGACAACTGCGGCGAGGAGACGGGCGCGGACC TCAGCGCGGTGGACAAGGTGAACGCCGGCACCGACCTGACCAGCCTCACG GACGGCAAGTTCAAGTGCTACATCAAGTGCCTCATGGAGACGTCGGGCAT GATGTCGGAGGGCGCCGTGGACCTGGACGCGGTGCTGGCGCTGCTGCCCG AGGACCTGCGCCACAAGAACGAGGACAAGCTGCGCG
CmedOBP10	Unigene17022_CmRNA	407	GGTAGCTACTGCAAAATGAAGACTTTCGTTGTATTCGCCGTCTGCCTCGT GGCTGTTCAGGCCCTAACTGATGAGCAAAAAGAAAAGCTAAAGAAACACA AGGGCGAATGCCTTTCAGAGACCAAAGTAGAGGAGGCGTTGGTAAACAAG CTCAGAACTGGAGATTACAAAACGGAGAATGATGCTCTGAAGAAGTATGC CCTCTGCATGATGATTAAGTCTGAGCTGATGACCAAAGACGGAAAGTTCA AGAAGGATGTTGCCATGGCTAAAGTAGCTAACCCTGCTGACAAACCTCAA GTAGAGAAGCTGATCGACACCTGCTTAGCCAACAAAGGGAACAGCCCGCA CCAGACAGCTTGGAACTACGTGAAGTGCTACCACGAGAAAGA…
CmedOBP11	Unigene3622_CmRNA	200	TTTCTCGGTCTTTAGGTGGTACCATTGCCATAGCTGTGTCTAGTTTGAAA ACTCCCTCGGGGGACATCAAATCATTCTTGATCAACAAACAATGCACCCA TTTCTTCAAAGATATGTCTTCAACATTCCATTTCCCAGTCGTCAATTTCA AAATCATTTCCGGGTTCGTTTTGGTTTCGTCAAAACATTCCATATGAAAT
CmedOBP12	Unigene12614_CmRNA	792	CCATTGGACTGGTCTACTAAAATCAGTGTCTTTAATTTTAAATTCTGTTG GTGAACCTATCAAAAATCTTAGTATAGAACTTTAAGATTCCAAAAATGTG GGCTAAAATGCTGATGGTAGTAGTAACCGTGGTCATGATGAGCGTGAACG TAGAATCGTCACAAACCTTGCTGAAGGATATGACGAAGAATTTCTTGAAG GCTTATGGCCAATGTCAGAAGGAGTTGGGTCTTCCGGATTCAACAGCGAC TGAGTTGATGAACTTCTGGAAGGAAGGGTACGAGATTAAGTCCCGAGAGG CCGGGTGCGCGATCATGTGCCTCTCTAAGAAGCTGGAGGTGATCGACCCT GAGGGCAAGCTGCATAAGGGCAAGACGACAGAGTTCATAGTG…
CmedOBP13	Unigene24375_CmRNA	234	ACATTTTTTAAGCTTCTGGATGAGTGTAAGAAGGAGCTCTCAGTATCAGA TGACCTGATCCAAGGGCTGGTCCGCTTCTGGCGCGAGGACGCGGACCTGG GCGCGCGCGAGCTGGGCTGCGTCATCATGTGCATCGCCAGCAAGCAGGAC CTCGTCATCCTAGAGGACTATAAGATGCACCACGAGAACGCGTACAACTT CGCCAGGGATCATGGAGCAGATGACGAAACGGCC
CmedOBP14	Unigene3153_CmRNA	497	TGTATCTCTTTTGATTCCATAGGCACCCCTTGGGGTATCCAGCTAGACGC CATTACGGCCTCCCGCATACATTTCATGGTGTCCAGGGCTCGAACACATG GGTTCGTCGACTCTGTCATCCTGCGGCATCCCACAAATAAGTCCACGAGA ATCTTCGCGATTCTTTCGTCGCCACCGTTCGCCCTGACGAAGCCCTTGCT ATTCTCCACGTGTATGTCTCCATTGTCCTCGAGCAGTTTCAGCTTCCTGC TGATGCAGACCAGGGCGCACCCGATCCTCGTGTCGGAGAACTGGAAGCGA GGGTCCCAGTAGTGCATCATGACCCTCTTCACATCCTGGCCGTATCCTAG CTCATCCAGGCACTTATGCGCCTTGTGGGAGAAAGCGAAGGT…
