# Supplementary material for: Transcriptome and Gene Expression Analysis of the Rice Leaf Folder, Cnaphalocrosis medinalis
Source: PLoS One. 2012 Nov 19;7(11):e47401. doi: 10.1371/journal.pone.0047401 (PMC3501527; doi:10.1371/journal.pone.0047401)
Supplement: Table S7 — The 10 most upregulated and 10 most downregulated genes in each library of comparisons. (XLS) [file pone.0047401.s010.xls]

## Sheet: Sheet1
Supplementary Table S7. The 10 most upregulated and 10 most downregulated genes in each library of comparisons.
	Cm1: eggs; Cm5: 3rd instar larvae.
Gene	RawIntensity-Cm1	RawIntensity-Cm5	TPM-Cm1	TPM-Cm5	log2 Ratio(Cm5/Cm1)	P-Value	FDR	GO Component	GO Function	GO Process	blast nr
Unigene16602_CmRNA	0	1792	0.01	301.48	14.8798	0	0	-	-	-	gi|156554399|ref|XP_001604593.1|/0.0/PREDICTED: ATP-dependent RNA helicase p62-like [Nasonia vitripennis]
Unigene4863_CmRNA	0	1772	0.01	298.11	14.8636	0	0	-	-	-	-
Unigene28430_CmRNA	0	1540	0.01	259.08	14.6611	0	0	-	-	-	gi|82568430|dbj|BAE48505.1|/e-156/juvenile hormone epoxide hydrolase [Athalia rosae]
Unigene16688_CmRNA	0	1520	0.01	255.72	14.6423	0	0	-	-	-	gi|340710483|ref|XP_003393817.1|/1e-53/PREDICTED: myelin P2 protein-like [Bombus terrestris]
Unigene18548_CmRNA	0	1350	0.01	227.12	14.4712	0	0	-	-	-	gi|156545396|ref|XP_001606403.1|/1e-15/PREDICTED: hypothetical protein LOC100122800 [Nasonia vitripennis]
Unigene16069_CmRNA	0	1036	0.01	174.29	14.0892	0	0	-	-	-	gi|285027695|gb|ADC34221.1|/e-118/60S ribosomal protein L7 [Solenopsis invicta]
Unigene31355_CmRNA	0	915	0.01	153.94	13.9101	5.49722e-278	2.72271e-276	-	-	-	gi|307192147|gb|EFN75475.1|/1e-75/27 kDa hemolymph protein [Harpegnathos saltator]
CL1164.Contig1_CmRNA	0	885	0.01	148.89	13.862	6.76964e-269	3.24564e-267	-	-	-	gi|91083579|ref|XP_968212.1|/e-173/PREDICTED: similar to lysyl-tRNA synthetase [Tribolium castaneum]
Unigene9206_CmRNA	0	873	0.01	146.87	13.8423	2.9291e-265	1.38221e-263	-	-	-	-
Unigene34154_CmRNA	0	807	0.01	135.77	13.7289	2.92188e-245	1.32157e-243	-	-	-	gi|156547524|ref|XP_001606841.1|/0.0/PREDICTED: asparaginyl-tRNA synthetase, cytoplasmic-like [Nasonia vitripennis]
Unigene16990_CmRNA	495	0	82.52	0.01	-13.0105	9.32774e-149	2.81618e-147	-	-	-	-
Unigene34932_CmRNA	438	0	73.02	0.01	-12.8341	1.03731e-131	2.91176e-130	-	-	-	gi|270006200|gb|EFA02648.1|/9e-42/hypothetical protein TcasGA2_TC008369 [Tribolium castaneum]
Unigene16853_CmRNA	428	0	71.35	0.01	-12.8007	1.01498e-128	2.81611e-127	-	-	-	gi|290560940|ref|NP_001166715.1|/2e-51/cuticular protein RR-1 motif 37 [Bombyx mori]
Unigene9658_CmRNA	382	0	63.68	0.01	-12.6366	5.7941e-115	1.50647e-113	-	-	-	gi|328779035|ref|XP_003249582.1|/4e-17/PREDICTED: hypothetical protein LOC100576540 [Apis mellifera]
Unigene11775_CmRNA	369	0	61.52	0.01	-12.5868	4.47404e-111	1.13614e-109	-	-	-	-
Unigene8770_CmRNA	314	0	52.35	0.01	-12.354	1.25523e-94	2.80693e-93	-	GO:0016746//transferase activity, transferring acyl groups	-	gi|91082923|ref|XP_972752.1|/0.0/PREDICTED: similar to transglutaminase [Tribolium castaneum]
CL1543.Contig1_CmRNA	238	0	39.68	0.01	-11.9542	6.7127e-72	1.23214e-70	-	-	-	-
Unigene16263_CmRNA	219	0	36.51	0.01	-11.8341	3.22806e-66	5.52736e-65	-	-	-	gi|290559915|ref|NP_001166760.1|/3e-29/cuticular protein hypothetical 17 [Bombyx mori]
Unigene16150_CmRNA	203	0	33.84	0.01	-11.7245	1.96708e-61	3.18613e-60	-	-	-	gi|260765451|gb|ACX49763.1|/0.0/beta-fructofuranosidase 2 [Manduca sexta]
CL538.Contig1_CmRNA	195	0	32.51	0.01	-11.6667	4.8558e-59	7.56848e-58	-	-	-	gi|3135759|emb|CAA70117.1|/2e-07/s18 chorion protein [Ceratitis capitata]
	Cm5: 3rd instar larvae; Cm3: pupae.
Gene	RawIntensity-Cm5	RawIntensity-Cm3	TPM-Cm5	TPM-Cm3	log2 Ratio(Cm3/Cm5)	P-Value	FDR	GO Component	GO Function	GO Process	blast nr
Unigene9658_CmRNA	0	1109	0.01	189.02	14.2063	0	0	-	-	-	gi|328779035|ref|XP_003249582.1|/4e-17/PREDICTED: hypothetical protein LOC100576540 [Apis mellifera]
Unigene16853_CmRNA	0	799	0.01	136.18	13.7332	1.607e-243	6.67608e-242	-	-	-	gi|290560940|ref|NP_001166715.1|/2e-51/cuticular protein RR-1 motif 37 [Bombyx mori]
Unigene11775_CmRNA	0	746	0.01	127.15	13.6342	2.04672e-227	7.9787e-226	-	-	-	-
Unigene8770_CmRNA	0	695	0.01	118.46	13.5321	6.43232e-212	2.33182e-210	-	GO:0016746//transferase activity, transferring acyl groups	-	gi|91082923|ref|XP_972752.1|/0.0/PREDICTED: similar to transglutaminase [Tribolium castaneum]
Unigene34932_CmRNA	0	678	0.01	115.56	13.4964	9.42186e-207	3.35153e-205	-	-	-	gi|270006200|gb|EFA02648.1|/9e-42/hypothetical protein TcasGA2_TC008369 [Tribolium castaneum]
Unigene16263_CmRNA	0	339	0.01	57.78	12.4964	9.67496e-104	2.11789e-102	-	-	-	gi|290559915|ref|NP_001166760.1|/3e-29/cuticular protein hypothetical 17 [Bombyx mori]
Unigene16326_CmRNA	0	295	0.01	50.28	12.2958	2.2692e-90	4.5237e-89	-	-	-	gi|291480639|gb|ADE06397.1|/3e-35/peritrophin type-A domain protein 2 [Mamestra configurata]
Unigene16150_CmRNA	0	225	0.01	38.35	11.905	4.2334e-69	6.94363e-68	-	-	-	gi|260765451|gb|ACX49763.1|/0.0/beta-fructofuranosidase 2 [Manduca sexta]
CL538.Contig1_CmRNA	0	225	0.01	38.35	11.905	4.2334e-69	6.93364e-68	-	-	-	gi|3135759|emb|CAA70117.1|/2e-07/s18 chorion protein [Ceratitis capitata]
Unigene33885_CmRNA	0	213	0.01	36.3	11.8258	1.87549e-65	2.97335e-64	-	-	-	gi|270297230|ref|NP_001161908.1|/e-104/cuticular protein analogous to peritrophins 3-D1 [Tribolium castaneum]
Unigene16551_CmRNA	47482	0	7988.15	0.01	-19.6075	0	0	-	-	-	gi|156547504|ref|XP_001602423.1|/2e-50/PREDICTED: 60S acidic ribosomal protein P1-like [Nasonia vitripennis]
Unigene16573_CmRNA	21195	0	3565.75	0.01	-18.4438	0	0	-	-	-	-
Unigene16014_CmRNA	20086	0	3379.18	0.01	-18.3663	0	0	-	-	-	gi|345498009|ref|XP_001603551.2|/4e-57/PREDICTED: venom allergen 3-like [Nasonia vitripennis]
Unigene16513_CmRNA	17034	0	2865.72	0.01	-18.1285	0	0	-	-	-	gi|307177476|gb|EFN66603.1|/e-106/40S ribosomal protein S8 [Camponotus floridanus]
Unigene16095_CmRNA	16928	0	2847.89	0.01	-18.1195	0	0	-	-	-	gi|66562243|ref|XP_624256.1|/1e-78/PREDICTED: 40S ribosomal protein S13 [Apis mellifera]
Unigene16160_CmRNA	15695	0	2640.45	0.01	-18.0104	0	0	-	-	-	gi|332018935|gb|EGI59481.1|/0.0/Hexamerin [Acromyrmex echinatior]
Unigene16569_CmRNA	14582	0	2453.21	0.01	-17.9043	0	0	-	-	-	gi|156553282|ref|XP_001599651.1|/e-116/PREDICTED: 40S ribosomal protein S3-like [Nasonia vitripennis]
Unigene16746_CmRNA	13258	0	2230.47	0.01	-17.767	0	0	-	-	-	gi|289629288|ref|NP_001166227.1|/e-160/elongation factor 1-alpha [Nasonia vitripennis]
Unigene17012_CmRNA	13227	0	2225.25	0.01	-17.7636	0	0	-	-	-	gi|66506623|ref|XP_396588.2|/e-108/PREDICTED: 60S ribosomal protein L15 [Apis mellifera]
CL1346.Contig1_CmRNA	12214	0	2054.83	0.01	-17.6487	0	0	-	-	-	-
	Cm3: pupae; Cm63A: female adults.
Gene	RawIntensity-Cm3	RawIntensity-Cm63A	TPM-Cm3	TPM-Cm63A	log2 Ratio(Cm63A/Cm3)	P-Value	FDR	GO Component	GO Function	GO Process	blast nr
Unigene5062_CmRNA	0	1898	0.01	330.29	15.0114	0	0	GO:0043231//intracellular membrane-bounded organelle;GO:0000785//chromatin;GO:0044444//cytoplasmic part	GO:0003676//nucleic acid binding	GO:0045638//negative regulation of myeloid cell differentiation;GO:0034728	gi|170058994|ref|XP_001865168.1|/2e-52/histone 1 [Culex quinquefasciatus]
Unigene29498_CmRNA	0	852	0.01	148.27	13.8559	4.4836e-261	6.09155e-259	-	-	-	gi|4235368|gb|AAD13187.1|/3e-48/follicular epithelium yolk protein subunit [Plodia interpunctella]
Unigene31586_CmRNA	0	536	0.01	93.28	13.1874	1.62584e-164	1.33265e-162	-	-	-	-
Unigene38094_CmRNA	0	484	0.01	84.23	13.0401	1.26069e-148	9.47235e-147	-	-	-	-
Unigene31786_CmRNA	0	368	0.01	64.04	12.6448	3.5195e-113	2.12844e-111	-	-	-	-
Unigene4386_CmRNA	0	355	0.01	61.78	12.5929	3.30266e-109	1.90441e-107	-	-	-	gi|327420502|gb|AEA76327.1|/5e-54/530_247_1 protein [Mamestra configurata]
Unigene16590_CmRNA	0	254	0.01	44.2	12.1098	2.40558e-78	9.8589e-77	-	-	-	-
Unigene9089_CmRNA	0	243	0.01	42.29	12.0461	5.52672e-75	2.18383e-73	-	-	-	-
Unigene37357_CmRNA	0	229	0.01	39.85	11.9604	1.04813e-70	3.87888e-69	GO:0016020//membrane	-	-	gi|308736974|ref|NP_001184180.1|/2e-11/vitellogenin receptor [Bombyx mori]
CL3114.Contig1_CmRNA	0	209	0.01	36.37	11.8285	1.35449e-64	4.60061e-63	-	-	-	-
Unigene16515_CmRNA	1028	0	175.21	0.01	-14.0968	1.4e-305	2.23955e-303	-	-	-	gi|333827700|gb|AEG19552.1|/0.0/storage protein [Ostrinia furnacalis]
Unigene22272_CmRNA	825	0	140.61	0.01	-13.7794	2.28974e-245	3.02795e-243	-	-	-	-
Unigene11775_CmRNA	746	0	127.15	0.01	-13.6342	6.11464e-222	7.05174e-220	-	-	-	-
Unigene34932_CmRNA	678	0	115.56	0.01	-13.4964	8.93356e-202	9.42586e-200	-	-	-	gi|270006200|gb|EFA02648.1|/9e-42/hypothetical protein TcasGA2_TC008369 [Tribolium castaneum]
Unigene16496_CmRNA	582	0	99.2	0.01	-13.2761	2.62284e-173	2.26203e-171	-	-	-	gi|328712442|ref|XP_003244811.1|/7e-20/PREDICTED: hypothetical protein LOC100572369 [Acyrthosiphon pisum]
Unigene15995_CmRNA	367	0	62.55	0.01	-12.6108	1.49508e-109	8.67148e-108	-	-	-	gi|15146043|gb|AAK83435.1|/2e-20/alpha-crystallin [Galleria mellonella]
Unigene16263_CmRNA	339	0	57.78	0.01	-12.4964	3.0044e-101	1.58498e-99	-	-	-	gi|290559915|ref|NP_001166760.1|/3e-29/cuticular protein hypothetical 17 [Bombyx mori]
Unigene16108_CmRNA	333	0	56.76	0.01	-12.4707	1.80714e-99	9.33502e-98	-	-	-	gi|194746281|ref|XP_001955609.1|/3e-57/GF16160 [Drosophila ananassae]
Unigene193_CmRNA	331	0	56.42	0.01	-12.462	7.0806e-99	3.58293e-97	-	-	-	-
Unigene17106_CmRNA	302	0	51.47	0.01	-12.3295	2.81646e-90	1.33017e-88	-	-	-	-
	Cm3: pupae; Cm62: male adults.
Gene	RawIntensity-Cm3	RawIntensity-Cm62	TPM-Cm3	TPM-Cm62	log2 Ratio(Cm62/Cm3)	P-Value	FDR	GO Component	GO Function	GO Process	blast nr
CL1229.Contig1_CmRNA	0	2887	0.01	482.11	15.5571	0	0	-	-	-	-
CL2263.Contig1_CmRNA	0	1463	0.01	244.31	14.5764	0	0	-	GO:0005488//binding;GO:0004672//protein kinase activity	GO:0044237//cellular metabolic process	gi|299930677|gb|ADJ58554.1|/2e-14/seminal fluid protein HACP006 [Heliconius melpomene]
CL1549.Contig1_CmRNA	0	1414	0.01	236.13	14.5273	0	0	-	-	-	gi|299930617|gb|ADJ58524.1|/7e-09/seminal fluid protein HACP021 [Heliconius erato]
Unigene18596_CmRNA	0	464	0.01	77.48	12.9196	2.3777e-138	1.00853e-136	-	-	-	-
CL2528.Contig1_CmRNA	0	440	0.01	73.48	12.8431	3.12508e-131	1.25357e-129	-	-	-	gi|257124471|gb|ACV41934.1|/1e-47/pyriform spidroin 1 [Latrodectus hesperus]
Unigene16500_CmRNA	0	429	0.01	71.64	12.8065	5.7227e-128	2.25474e-126	-	-	-	gi|28571535|ref|NP_731093.2|/1e-11/PFTAIRE-interacting factor 2 [Drosophila melanogaster]
Unigene19649_CmRNA	0	426	0.01	71.14	12.7964	4.44056e-127	1.73417e-125	-	-	-	-
Unigene12719_CmRNA	0	403	0.01	67.3	12.7164	2.948e-120	1.11209e-118	-	-	-	-
Unigene1404_CmRNA	0	320	0.01	53.44	12.3837	1.22568e-95	3.83945e-94	-	-	-	gi|345485435|ref|XP_001605801.2|/6e-12/PREDICTED: hypothetical protein LOC100122199 [Nasonia vitripennis]
Unigene33056_CmRNA	0	309	0.01	51.6	12.3332	2.24448e-92	6.81415e-91	-	GO:0004672//protein kinase activity;GO:0000166//nucleotide binding	-	gi|242016558|ref|XP_002428853.1|/e-131/cAMP-dependent protein kinase catalytic subunit, putative [Pediculus humanus corporis]
CL1681.Contig1_CmRNA	14514	0	2473.79	0.01	-17.9164	0	0	-	-	-	gi|290563283|ref|NP_001166765.1|/1e-34/cuticular protein hypothetical 12 [Bombyx mori]
CL2484.Contig1_CmRNA	214572	2	36572.1	0.33	-16.7579	0	0	-	-	-	gi|290560822|ref|NP_001166761.1|/8e-63/cuticular protein hypothetical 16 [Bombyx mori]
Unigene8734_CmRNA	1644	0	280.21	0.01	-14.7742	0	0	-	GO:0005198//structural molecule activity	-	gi|223671268|tpd|FAA00586.1|/3e-77/TPA: putative cuticle protein [Bombyx mori]
Unigene17234_CmRNA	1147	0	195.5	0.01	-14.2549	0	0	-	-	-	gi|290560816|ref|NP_001166748.1|/2e-94/cuticular protein hypothetical 30 [Bombyx mori]
Unigene16515_CmRNA	1028	0	175.21	0.01	-14.0968	0	0	-	-	-	gi|333827700|gb|AEG19552.1|/0.0/storage protein [Ostrinia furnacalis]
Unigene22272_CmRNA	825	0	140.61	0.01	-13.7794	9.20476e-253	6.47621e-251	-	-	-	-
Unigene11775_CmRNA	746	0	127.15	0.01	-13.6342	1.25297e-228	8.10771e-227	-	-	-	-
CL578.Contig1_CmRNA	22988	2	3918.12	0.33	-13.5354	0	0	GO:0044421//extracellular region part	GO:0022892	GO:0015669//gas transport	gi|110743533|dbj|BAE98324.1|/0.0/methionine-rich storage protein [Chilo suppressalis]
Unigene151_CmRNA	537	0	91.53	0.01	-13.16	8.8293e-165	4.2539e-163	-	-	-	gi|223671143|tpd|FAA00523.1|/2e-73/TPA: putative cuticle protein [Bombyx mori]
Unigene16263_CmRNA	339	0	57.78	0.01	-12.4964	2.71326e-104	9.07662e-103	-	-	-	gi|290559915|ref|NP_001166760.1|/3e-29/cuticular protein hypothetical 17 [Bombyx mori]
