# Supplementary material for: Transcriptome and Gene Expression Analysis of the Rice Leaf Folder, Cnaphalocrosis medinalis
Source: PLoS One. 2012 Nov 19;7(11):e47401. doi: 10.1371/journal.pone.0047401 (PMC3501527; doi:10.1371/journal.pone.0047401)
Supplement: Table S8 — Gene set enrichment analysis compared 3rd instar larvae with eggs. (XLS) [file pone.0047401.s011.xls]

## Sheet: GO
Supplementary Table S8. Gene set enrichment analysis compared 3rd instar larvae with eggs.
Category	Subcategory	P-value	Total	Upregulation	Downregulation
Biological Process	generation of precursor metabolites and energy	6.63e-06	27	13	14
	oxidation-reduction process	2.36e-05	27	13	14
	energy derivation by oxidation of organic compounds	9.88e-05	23	12	11
	cellular respiration	0.00078	20	10	10
	electron transport chain	0.0131	14	5	9
	respiratory electron transport chain	0.0271	12	5	7
	metabolic process	0.0437	342	249	93
Cellular Component	ribonucleoprotein complex	6.03e-11	67	46	21
	ribosome	8.48e-06	20	13	7
	macromolecular complex	1.15e-05	132	92	40
	cytoplasm	3.98e-05	118	77	41
	cytoplasmic part	4.59e-05	114	73	41
	small ribosomal subunit	0.00012	11	6	5
	intracellular	0.00096	302	217	85
	ribosomal subunit	0.00097	15	9	6
	intracellular part	0.0015	296	214	82
	mitochondrion	0.00393	29	16	13
	respiratory chain	0.0227	10	4	6
	mitochondrial inner membrane	0.0359	13	6	7
Molecular Function	structural molecule activity	3.28e-09	45	28	17
	NADH dehydrogenase activity	0.00043	11	4	7
	oxidoreductase activity, acting on NADH or NADPH	0.00059	16	5	11
	oxidoreductase activity	0.00139	71	48	23

## Sheet: KO
KEGG Pathway Category	Q-value	Total
Ribosome	1.58e-39	103
Oxidative phosphorylation	3.82e-36	115
Parkinson's disease	1.95e-33	103
Alzheimer's disease	8.56e-28	124
Metabolic pathways	9.77e-16	438
Huntington's disease	1.03e-15	116
Vibrio cholerae infection	7.75e-10	86
Protein export	1.9e-06	22
Citrate cycle (TCA cycle)	3.92e-06	35
Cardiac muscle contraction	2.12e-05	48
Glycolysis/Gluconeogenesis	2.12e-05	36
Protein processing in endoplasmic reticulum	0.000132	79
Antigen processing and presentation	0.000293	26
Phagosome	0.000317	63
alpha-Linolenic acid metabolism	0.000541	24
Proteasome	0.000541	28
Valine, leucine and isoleucine degradation	0.00158	34
Amoebiasis	0.00237	75
Tyrosine metabolism	0.00553	32
Fatty acid metabolism	0.00603	27
Phototransduction-fly	0.00661	23
Rheumatoid arthritis	0.0135	21
Collecting duct acid secretion	0.0224	15
Melanogenesis	0.0266	27
Complement and coagulation cascades	0.0279	20
Gastric acid secretion	0.03	32
Long-term potentiation	0.0304	24
PPAR signaling pathway	0.0408	33
Glyoxylate and dicarboxylate metabolism	0.0408	11
