# Supplementary material for: Transcriptome and Gene Expression Analysis of the Rice Leaf Folder, Cnaphalocrosis medinalis
Source: PLoS One. 2012 Nov 19;7(11):e47401. doi: 10.1371/journal.pone.0047401 (PMC3501527; doi:10.1371/journal.pone.0047401)
Supplement: Table S10 — Gene set enrichment analysis compared adults with pupae. (XLS) [file pone.0047401.s013.xls]

## Sheet: GO
Supplementary Table S10. Gene set enrichment analysis compared adults with pupae.
	Gene set enrichment analysis compared female adults with pupae
Category	Subcategory	P-value	Total	Upregulation	Downregulation
Biological Process	gene expression	2.87e-05	61	56	5
	macromolecule metabolic process	0.0231	102	93	9
Cellular Component	ribonucleoprotein complex	7.63e-08	37	33	4
	intracellular	0.00024	149	125	24
	ribosome	0.00026	12	10	2
	intracellular part	0.00047	146	122	24
	macromolecular complex	0.00086	66	60	6
	ribosomal subunit	0.00127	10	9	1
	organellar ribosome	0.00722	8	8	0
Molecular Function	-	-	-	-	-
	Gene set enrichment analysis compared male adults with pupae
Category	Subcategory	P-value	Total	Upregulation	Downregulation
Biological Process	serine family amino acid metabolic process	0.00648	5	1	4
Cellular Component	ribonucleoprotein complex	9.53e-05	24	2	22
	macromolecular complex	0.0373	43	9	34
Molecular Function	structural molecule activity	0.014	15	0	15

## Sheet: KO
Gene set enrichment analysis compared female adults with pupae
KEGG Pathway Category	Q-value	Total
Vibrio cholerae infection	3.56e-06	48
Amoebiasis	0.00455	45
RNA transport	0.00578	55
Parkinson's disease	0.00605	29
Systemic lupus erythematosus	0.023	11
Huntington's disease	0.023	42
Protein export	0.023	10
Alzheimer's disease	0.037	35
Spliceosome	0.0494	50
Gene set enrichment analysis compared male adults with pupae
KEGG Pathway Category	Q-value	Total
Ribosome	6.04e-22	54
Vibrio cholerae infection	2.33e-08	49
Parkinson's disease	6.36e-07	36
Amoebiasis	8.32e-07	51
Alzheimer's disease	1.5e-06	45
Oxidative phosphorylation	3.33e-06	36
Metabolic pathways	5.76e-05	184
Huntington's disease	0.000117	46
Phototransduction-fly	0.000689	16
Gastric acid secretion	0.00101	22
Glycine, serine and threonine metabolism	0.00277	17
Pathogenic Escherichia coli infection	0.0195	23
Glycolysis/Gluconeogenesis	0.0202	16
Cardiac muscle contraction	0.0228	21
Metabolism of xenobiotics by cytochrome P450	0.0229	16
Antigen processing and presentation	0.0356	12
Salivary secretion	0.0449	19
