# Supplementary material for: Transcriptome and Gene Expression Analysis of the Rice Leaf Folder, Cnaphalocrosis medinalis
Source: PLoS One. 2012 Nov 19;7(11):e47401. doi: 10.1371/journal.pone.0047401 (PMC3501527; doi:10.1371/journal.pone.0047401)
Supplement: Table S12 — Genes related to sex differences. (XLS) [file pone.0047401.s015.xls]

## Sheet: Sheet1
Supplementary Table S12. Genes related to sex differences.
	Cm62: male adult; Cm63A: female adult.
Gene	RawIntensity-Cm62	RawIntensity-Cm63A	TPM-Cm62	TPM-Cm63A	log2 Ratio(Cm63A/Cm62)	P-Value	FDR	GO Component	GO Function	GO Process	blast nr	Gene Name	Description
Unigene34074_CmRNA	0	35	0.01	6.09	9.2503	1.37488e-11	8.65921e-11	-	-	-	gi|343965926|gb|AEM75020.1|/0.0/vitellogenin [Cnaphalocrocis medinalis]	Vg	vitellogenin
Unigene37357_CmRNA	0	229	0.01	39.85	11.9604	9.62428e-72	2.32143e-70	GO:0016020//membrane	-	-	gi|308736974|ref|NP_001184180.1|/2e-11/vitellogenin receptor [Bombyx mori]	VgR	vitellogenin receptor
Unigene29498_CmRNA	0	852	0.01	148.27	13.8559	6.39038e-265	5.77e-263	-	-	-	gi|4235368|gb|AAD13187.1|/3e-48/follicular epithelium yolk protein subunit [Plodia interpunctella]	YP4	follicular epithelium yolk protein subunit
Unigene16070_CmRNA	7	338	1.17	58.82	5.65173	1.5597e-93	4.79325e-92	GO:0030529//ribonucleoprotein complex	GO:0005198//structural molecule activity	GO:0006950//response to stress	gi|323541200|gb|ADX96000.1|/1e-91/small heat shock protein 19.8 [Cydia pomonella]	HSP19.8	small heat shock protein 19.8
Unigene18288_CmRNA	25	65	4.17	11.31	1.43948	8.35866e-06	3.35894e-05	GO:0005634//nucleus	-	GO:0007281//germ cell development;GO:0007275//multicellular organismal development	gi|9256486|gb|AAB31298.2|/7e-12/temperature-dependent sex determining protein [Chelydra serpentina]	TSD	temperature-dependent sex determining protein
Unigene19479_CmRNA	19	54	3.17	9.4	1.56818	1.55299e-05	6.05932e-05	-	GO:0005488//binding	-	gi|187281373|ref|NP_001119707.1|/7e-37/transformer 2 isoform C [Bombyx mori]	Tra2	involving in insect sex determination
CL2970.Contig1_CmRNA	464	1509	77.48	262.6	1.76097	3.10526e-138	1.35397e-136	-	-	-	gi|6671050|gb|AAF23078.1|AF128867_1/3e-71/glutathione S-transferase [Choristoneura fumiferana]	GST	glutathione S-transferase
Unigene31941_CmRNA	0	18	0.01	3.13	8.29002	2.56786e-06	1.0944e-05	-	-	-	gi|339283874|gb|AEJ38206.1|/4e-54/antennal esterase CarE7 [Spodoptera exigua]	CarE7	carboxylesterase
Unigene8652_CmRNA	18	0	3.01	0.01	-8.23362	5.62136e-06	2.29511e-05	GO:0044464//cell part	GO:0046872//metal ion binding;GO:0016491//oxidoreductase activity	-	gi|241659423|emb|CAZ65618.1|/e-108/cytochrome P450 [Cnaphalocrocis medinalis]	CYP6CV1	cytochrome P450
Unigene12614_CmRNA	53	0	8.85	0.01	-9.78953	3.3417e-16	2.61668e-15	-	GO:0005488//binding	GO:0051234//establishment of localization	gi|205361600|dbj|BAG71419.1|/3e-63/pheromone binding protein [Diaphania indica]	PBP	pheromone binding protein
Unigene9631_CmRNA	231	0	38.58	0.01	-11.9136	3.29684e-68	7.6974e-67	-	-	-	gi|226501484|ref|NP_001140186.1|/7e-08/odorant-binding protein 2 [Bombyx mori]	OBP2	odorant-binding protein
CL2263.Contig1_CmRNA	1463	0	244.31	0.01	-14.5764	0	0	-	GO:0005488//binding;GO:0004672//protein kinase activity	GO:0044237//cellular metabolic process	gi|299930677|gb|ADJ58554.1|/2e-14/seminal fluid protein HACP006 [Heliconius melpomene]	SFP	seminal fluid protein
