# Supplementary material for: Transcriptome and Gene Expression Analysis of the Rice Leaf Folder, Cnaphalocrosis medinalis
Source: PLoS One. 2012 Nov 19;7(11):e47401. doi: 10.1371/journal.pone.0047401 (PMC3501527; doi:10.1371/journal.pone.0047401)
Supplement: Table S13 — Top 10 specific expressed genes in each library comparison. (XLS) [file pone.0047401.s016.xls]

## Sheet: Sheet1
Supplemental Table S13. Top 10 specific expressed genes in each library comparison.
Comparison	Library	Unigene ID	Discription	Gene expression copy numbers (TPM)
egg/3rd instar larva	Specific genes in egg	Unigene16990_CmRNA	-	82.52
		Unigene34932_CmRNA	gi|270006200|gb|EFA02648.1|/9e-42/hypothetical protein TcasGA2_TC008369 [Tribolium castaneum]	73.02
		Unigene16853_CmRNA	gi|290560940|ref|NP_001166715.1|/2e-51/cuticular protein RR-1 motif 37 [Bombyx mori]	71.35
		Unigene9658_CmRNA	gi|328779035|ref|XP_003249582.1|/4e-17/PREDICTED: hypothetical protein LOC100576540 [Apis mellifera]	63.68
		Unigene11775_CmRNA	-	61.52
		Unigene8770_CmRNA	gi|91082923|ref|XP_972752.1|/0.0/PREDICTED: similar to transglutaminase [Tribolium castaneum]	52.35
		CL1543.Contig1_CmRNA	-	39.68
		Unigene16263_CmRNA	gi|290559915|ref|NP_001166760.1|/3e-29/cuticular protein hypothetical 17 [Bombyx mori]	36.51
		Unigene16150_CmRNA	gi|260765451|gb|ACX49763.1|/0.0/beta-fructofuranosidase 2 [Manduca sexta]	33.84
		CL538.Contig1_CmRNA	gi|3135759|emb|CAA70117.1|/2e-07/s18 chorion protein [Ceratitis capitata]	32.51
	Specific genes in 3rd instar larva	Unigene16602_CmRNA	gi|156554399|ref|XP_001604593.1|/0.0/PREDICTED: ATP-dependent RNA helicase p62-like [Nasonia vitripennis]	301.48
		Unigene4863_CmRNA	-	298.11
		Unigene28430_CmRNA	gi|82568430|dbj|BAE48505.1|/e-156/juvenile hormone epoxide hydrolase [Athalia rosae]	259.08
		Unigene16688_CmRNA	gi|340710483|ref|XP_003393817.1|/1e-53/PREDICTED: myelin P2 protein-like [Bombus terrestris]	255.72
		Unigene18548_CmRNA	gi|156545396|ref|XP_001606403.1|/1e-15/PREDICTED: hypothetical protein LOC100122800 [Nasonia vitripennis]	227.12
		Unigene16069_CmRNA	gi|285027695|gb|ADC34221.1|/e-118/60S ribosomal protein L7 [Solenopsis invicta]	174.29
		Unigene31355_CmRNA	gi|307192147|gb|EFN75475.1|/1e-75/27 kDa hemolymph protein [Harpegnathos saltator]	153.94
		CL1164.Contig1_CmRNA	gi|91083579|ref|XP_968212.1|/e-173/PREDICTED: similar to lysyl-tRNA synthetase [Tribolium castaneum]	148.89
		Unigene9206_CmRNA	-	146.87
		Unigene34154_CmRNA	gi|156547524|ref|XP_001606841.1|/0.0/PREDICTED: asparaginyl-tRNA synthetase, cytoplasmic-like [Nasonia vitripennis]	135.77
3rd instar larva/pupa	Specific genes in 3rd instar larva	Unigene16551_CmRNA	gi|156547504|ref|XP_001602423.1|/2e-50/PREDICTED: 60S acidic ribosomal protein P1-like [Nasonia vitripennis]	7988.15
		Unigene16573_CmRNA	-	3565.75
		Unigene16014_CmRNA	gi|345498009|ref|XP_001603551.2|/4e-57/PREDICTED: venom allergen 3-like [Nasonia vitripennis]	3379.18
		Unigene16513_CmRNA	gi|307177476|gb|EFN66603.1|/e-106/40S ribosomal protein S8 [Camponotus floridanus]	2865.72
		Unigene16095_CmRNA	gi|66562243|ref|XP_624256.1|/1e-78/PREDICTED: 40S ribosomal protein S13 [Apis mellifera]	2847.89
		Unigene16160_CmRNA	gi|332018935|gb|EGI59481.1|/0.0/Hexamerin [Acromyrmex echinatior]	2640.45
		Unigene16569_CmRNA	gi|156553282|ref|XP_001599651.1|/e-116/PREDICTED: 40S ribosomal protein S3-like [Nasonia vitripennis]	2453.21
		Unigene16746_CmRNA	gi|289629288|ref|NP_001166227.1|/e-160/elongation factor 1-alpha [Nasonia vitripennis]	2230.47
		Unigene17012_CmRNA	gi|66506623|ref|XP_396588.2|/e-108/PREDICTED: 60S ribosomal protein L15 [Apis mellifera]	2225.25
		CL1346.Contig1_CmRNA	-	2054.83
	Specific genes in pupa	Unigene9658_CmRNA	gi|328779035|ref|XP_003249582.1|/4e-17/PREDICTED: hypothetical protein LOC100576540 [Apis mellifera]	189.02
		Unigene16853_CmRNA	gi|290560940|ref|NP_001166715.1|/2e-51/cuticular protein RR-1 motif 37 [Bombyx mori]	136.18
		Unigene11775_CmRNA	-	127.15
		Unigene8770_CmRNA	gi|91082923|ref|XP_972752.1|/0.0/PREDICTED: similar to transglutaminase [Tribolium castaneum]	118.46
		Unigene34932_CmRNA	gi|270006200|gb|EFA02648.1|/9e-42/hypothetical protein TcasGA2_TC008369 [Tribolium castaneum]	115.56
		Unigene16263_CmRNA	gi|290559915|ref|NP_001166760.1|/3e-29/cuticular protein hypothetical 17 [Bombyx mori]	57.78
		Unigene16326_CmRNA	gi|291480639|gb|ADE06397.1|/3e-35/peritrophin type-A domain protein 2 [Mamestra configurata]	50.28
		Unigene16150_CmRNA	gi|260765451|gb|ACX49763.1|/0.0/beta-fructofuranosidase 2 [Manduca sexta]	38.35
		CL538.Contig1_CmRNA	gi|3135759|emb|CAA70117.1|/2e-07/s18 chorion protein [Ceratitis capitata]	38.35
		Unigene33885_CmRNA	gi|270297230|ref|NP_001161908.1|/e-104/cuticular protein analogous to peritrophins 3-D1 [Tribolium castaneum]	36.3
adults/pupa	Specific genes in pupa	CL1681.Contig1_CmRNA	gi|290563283|ref|NP_001166765.1|/1e-34/cuticular protein hypothetical 12 [Bombyx mori]	2473.79
		Unigene8734_CmRNA	gi|223671268|tpd|FAA00586.1|/3e-77/TPA: putative cuticle protein [Bombyx mori]	280.21
		Unigene17234_CmRNA	gi|290560816|ref|NP_001166748.1|/2e-94/cuticular protein hypothetical 30 [Bombyx mori]	195.5
		Unigene16515_CmRNA	gi|333827700|gb|AEG19552.1|/0.0/storage protein [Ostrinia furnacalis]	175.21
		Unigene22272_CmRNA	-	140.61
		Unigene11775_CmRNA	-	127.15
		Unigene34932_CmRNA	gi|270006200|gb|EFA02648.1|/9e-42/hypothetical protein TcasGA2_TC008369 [Tribolium castaneum]	115.56
		Unigene16496_CmRNA	gi|328712442|ref|XP_003244811.1|/7e-20/PREDICTED: hypothetical protein LOC100572369 [Acyrthosiphon pisum]	99.2
		Unigene151_CmRNA	gi|223671143|tpd|FAA00523.1|/2e-73/TPA: putative cuticle protein [Bombyx mori]	91.53
		Unigene16263_CmRNA	gi|290559915|ref|NP_001166760.1|/3e-29/cuticular protein hypothetical 17 [Bombyx mori]	57.78
	Specific genes in adults	CL1229.Contig1_CmRNA	-	482.11
		Unigene5062_CmRNA	gi|170058994|ref|XP_001865168.1|/2e-52/histone 1 [Culex quinquefasciatus]	330.29
		CL2263.Contig1_CmRNA	gi|299930677|gb|ADJ58554.1|/2e-14/seminal fluid protein HACP006 [Heliconius melpomene]	244.31
		CL1549.Contig1_CmRNA	gi|299930617|gb|ADJ58524.1|/7e-09/seminal fluid protein HACP021 [Heliconius erato]	236.13
		Unigene29498_CmRNA	gi|4235368|gb|AAD13187.1|/3e-48/follicular epithelium yolk protein subunit [Plodia interpunctella]	148.27
		Unigene31586_CmRNA	-	93.28
		Unigene38094_CmRNA	-	84.23
		Unigene18596_CmRNA	-	77.48
		CL2528.Contig1_CmRNA	gi|257124471|gb|ACV41934.1|/1e-47/pyriform spidroin 1 [Latrodectus hesperus]	73.48
		Unigene16500_CmRNA	gi|28571535|ref|NP_731093.2|/1e-11/PFTAIRE-interacting factor 2 [Drosophila melanogaster]	71.64
Note: adults/pupa: gene expression numbers of adults(female and male adults) and pupa were performed.
TPM is number of transcripts per million clean tags in each sample.
